# Supplementary material
Source: Research Square preprint supplement (doi:10.21203/rs.3.rs-8682343/v1)
Supplement: Supplementary file 2 [file 96f1db23ca3a19bad55b7cfd.xlsx]

## Sheet: Table_S1
differential proteaosme gene expression in GSCs vs NSPCs single cell data
	p_val	avg_log2FC	pct.1	pct.2	p_val_adj	gene
AP006222.2	1.12661e-196	0.682367	1	0.5	1.78894e-192	AP006222.2
AC093323.3	1.14929e-169	0.0928743	1	0.75	1.82496e-165	AC093323.3
AC090498.1	2.89231e-127	2.44788	1	1	4.5927e-123	AC090498.1
RPS7	1.56689e-109	4.29921	1	1	2.48806e-105	RPS7
RPS17	1.9172e-104	4.97374	1	1	3.04433e-100	RPS17
EIF3C	8.04416e-102	-5.3589	1	1	1.27733e-97	EIF3C
ETNK1	8.11005e-98	-4.21563	1	1	1.28779e-93	ETNK1
PTMS	1.06058e-90	4.03186	1	1	1.6841e-86	PTMS
RC3H1	4.67856e-90	-4.79161	1	1	7.42909e-86	RC3H1
RPLP1	1.98414e-86	4.62519	1	1	3.15061e-82	RPLP1
RPS16	1.48303e-85	4.59044	1	1	2.35491e-81	RPS16
RPL14	1.17608e-84	3.83248	1	1	1.86751e-80	RPL14
CCNT2	2.47362e-82	-3.85429	1	1	3.92786e-78	CCNT2
USP33	1.14485e-80	-2.87461	1	1	1.81791e-76	USP33
RPLP2	2.04778e-80	5.37799	1	1	3.25167e-76	RPLP2
RPL30	6.1284e-80	4.42094	1	1	9.73129e-76	RPL30
NACA2	1.36435e-79	-1.26618	1	0.75	2.16645e-75	NACA2
FAU	6.49831e-79	3.80351	1	1	1.03187e-74	FAU
PDAP1	3.39484e-77	2.17873	1	1	5.39066e-73	PDAP1
RPL29	2.10834e-76	4.11093	1	1	3.34783e-72	RPL29
MYL6B	1.13616e-75	2.02376	1	1	1.8041e-71	MYL6B
UBE2M	1.22078e-75	2.44546	1	1	1.93848e-71	UBE2M
RPL12	3.07359e-75	4.32046	1	1	4.88056e-71	RPL12
CYP51A1	3.3002e-75	-6.55777	1	1	5.24038e-71	CYP51A1
LINC00685	3.90577e-75	0.745433	1	0.75	6.20197e-71	LINC00685
C19orf53	5.23121e-75	3.47729	1	1	8.30663e-71	C19orf53
MRPS33	2.50167e-74	2.26886	1	1	3.97241e-70	MRPS33
RPL9	2.36546e-72	3.30031	1	1	3.75612e-68	RPL9
COA4	3.39747e-70	1.57779	1	1	5.39485e-66	COA4
RPL26	1.11175e-69	4.44798	1	1	1.76535e-65	RPL26
RPL39	1.04275e-68	5.42751	1	1	1.65578e-64	RPL39
DDT	8.80986e-68	2.82534	1	1	1.39892e-63	DDT
RPL35A	3.82897e-67	4.28749	1	1	6.08003e-63	RPL35A
ANKHD1	1.3776e-66	-3.92929	1	1	2.18749e-62	ANKHD1
TBCA	5.36545e-65	3.73014	1	1	8.5198e-61	TBCA
RPL32	7.0182e-65	4.57794	1	1	1.11442e-60	RPL32
RPS20	8.13972e-65	4.14641	1	1	1.29251e-60	RPS20
RPL24	1.24756e-64	3.98694	1	1	1.98101e-60	RPL24
SEC61B	2.43583e-64	3.11864	1	1	3.86785e-60	SEC61B
BRI3	1.51926e-63	3.29572	1	1	2.41243e-59	BRI3
DPM3	1.9861e-63	2.01018	1	1	3.15372e-59	DPM3
RPL7A	4.52822e-63	3.65746	1	1	7.19036e-59	RPL7A
NACA	4.86412e-63	2.75519	1	1	7.72373e-59	NACA
TMEM256	9.86029e-63	2.41968	1	1	1.56572e-58	TMEM256
DYNLL1	3.90703e-62	2.39236	1	1	6.20398e-58	DYNLL1
UBALD2	2.07988e-61	1.64	1	1	3.30265e-57	UBALD2
CSNK1G2	2.35985e-61	0.705572	1	1	3.7472e-57	CSNK1G2
RPL28	2.58984e-61	4.81118	1	1	4.1124e-57	RPL28
RPL37	3.4186e-61	4.42383	1	1	5.42839e-57	RPL37
DNAJB1	4.87911e-61	-5.62753	1	1	7.74754e-57	DNAJB1
MTRNR2L12	6.59946e-61	0.511043	1	0.75	1.04793e-56	MTRNR2L12
RLF	6.68504e-61	-3.85231	1	1	1.06152e-56	RLF
MT-CO2	5.93537e-60	3.45288	1	1	9.42477e-56	MT-CO2
DYNLRB1	7.41606e-60	2.26722	1	1	1.1776e-55	DYNLRB1
FKBP2	9.58746e-60	2.05772	1	1	1.52239e-55	FKBP2
QRICH1	1.34488e-59	-3.44613	1	1	2.13554e-55	QRICH1
EVA1B	1.4616e-59	0.899069	1	1	2.32087e-55	EVA1B
MT-ATP6	1.63834e-59	3.6898	1	1	2.60152e-55	MT-ATP6
RPS15	3.89867e-59	4.29435	1	1	6.1907e-55	RPS15
C1orf122	6.41285e-59	2.66895	1	1	1.0183e-54	C1orf122
TBX2-AS1	1.80996e-58	0.408868	1	0.5	2.87403e-54	TBX2-AS1
BTF3	2.20288e-58	2.72586	1	1	3.49795e-54	BTF3
CHCHD10	2.7553e-58	2.85085	1	1	4.37514e-54	CHCHD10
CHMP4B	3.04083e-58	1.65558	1	1	4.82853e-54	CHMP4B
ALG11	3.77213e-58	-4.06283	1	1	5.98977e-54	ALG11
RPL37A	5.48588e-58	5.36309	1	1	8.71103e-54	RPL37A
RPS21	9.2002e-58	5.1628	1	1	1.4609e-53	RPS21
UQCRH	5.13171e-57	3.8868	1	1	8.14864e-53	UQCRH
AP4B1	1.59147e-56	-3.7419	1	1	2.52709e-52	AP4B1
NECAP1	1.89911e-56	-3.13851	1	1	3.0156e-52	NECAP1
HEATR5B	3.06055e-56	-3.92455	1	1	4.85985e-52	HEATR5B
CLK1	5.49525e-56	-4.39099	1	1	8.72591e-52	CLK1
RAB13	1.07817e-55	2.96459	1	1	1.71203e-51	RAB13
RPS27A	1.32547e-55	3.82677	1	1	2.10471e-51	RPS27A
STRIP1	3.46137e-55	-3.56041	1	1	5.49631e-51	STRIP1
EDF1	4.89279e-55	2.63442	1	1	7.76927e-51	EDF1
MT-ND3	6.08519e-55	6.07423	1	1	9.66268e-51	MT-ND3
EEF1G	6.32243e-55	-6.75216	1	1	1.00394e-50	EEF1G
ERH	6.4115e-55	2.37938	1	1	1.01808e-50	ERH
RPL36	7.93344e-55	4.57614	1	1	1.25975e-50	RPL36
RPL35	2.65449e-54	4.30328	1	1	4.21507e-50	RPL35
UBA52	1.85015e-53	3.63893	1	1	2.93786e-49	UBA52
UQCC2	3.11896e-53	2.02316	1	1	4.9526e-49	UQCC2
EYA3	3.22261e-53	-3.17536	1	1	5.11719e-49	EYA3
RPL41	4.47111e-53	4.62904	1	1	7.09968e-49	RPL41
NDUFB10	8.19416e-53	2.22904	1	1	1.30115e-48	NDUFB10
RPL27A	9.25657e-53	4.04885	1	1	1.46985e-48	RPL27A
ZNF460	9.6373e-53	-6.60804	0.931	1	1.53031e-48	ZNF460
TET2	1.14323e-52	-4.09006	1	1	1.81533e-48	TET2
PAPOLG	2.34287e-52	-3.70945	1	1	3.72024e-48	PAPOLG
ZCRB1	7.69614e-52	1.89419	1	1	1.22207e-47	ZCRB1
RPL23A	7.98744e-52	4.04563	1	1	1.26833e-47	RPL23A
DDX39B	9.28249e-52	-5.12853	1	1	1.47397e-47	DDX39B
UXT	2.8002e-51	1.94983	1	1	4.44643e-47	UXT
SMIM4	3.38399e-51	2.18102	1	1	5.37343e-47	SMIM4
TSPYL4	4.71032e-51	-5.38397	1	1	7.47952e-47	TSPYL4
RPL6	6.26885e-51	2.92474	1	1	9.95431e-47	RPL6
HSPA1B	6.47055e-51	-7.7068	1	1	1.02746e-46	HSPA1B
RPL18	7.98973e-51	3.29011	1	1	1.26869e-46	RPL18
HNRNPLL	8.26137e-51	-2.54743	1	1	1.31182e-46	HNRNPLL
MGA	9.94885e-51	-3.23521	1	1	1.57978e-46	MGA
RPS19BP1	1.09234e-50	2.16966	1	1	1.73452e-46	RPS19BP1
PAN3	1.73697e-50	-4.73664	1	1	2.75814e-46	PAN3
IER5L	2.24889e-50	0.0840562	1	1	3.57102e-46	IER5L
FAM120B	2.94643e-50	-4.6132	1	1	4.67864e-46	FAM120B
SCAND1	6.99195e-50	1.85802	1	1	1.11025e-45	SCAND1
ATP6V1F	9.81023e-50	2.04592	1	1	1.55777e-45	ATP6V1F
RPS12	1.61968e-49	5.28416	1	1	2.57189e-45	RPS12
TMA7	4.52269e-49	3.81845	1	1	7.18157e-45	TMA7
WDR47	5.00516e-49	-4.5803	1	1	7.9477e-45	WDR47
COX17	5.22309e-49	3.23608	1	1	8.29374e-45	COX17
TADA3	6.98431e-49	1.15477	1	1	1.10904e-44	TADA3
ZNF580	7.6179e-49	1.7208	1	1	1.20965e-44	ZNF580
S100A13	8.21703e-49	3.40176	1	1	1.30478e-44	S100A13
RPS13	1.00039e-48	3.65658	1	1	1.58853e-44	RPS13
MRPL34	1.06407e-48	2.07521	1	1	1.68964e-44	MRPL34
CHCHD2	1.10314e-48	3.05623	1	1	1.75167e-44	CHCHD2
COX7C	2.13973e-48	3.51888	1	1	3.39767e-44	COX7C
ETV3	2.1449e-48	-3.81799	1	1	3.40588e-44	ETV3
NDUFB1	4.25226e-48	3.59471	1	1	6.75217e-44	NDUFB1
ZNF141	7.18094e-48	-3.62722	1	1	1.14026e-43	ZNF141
COX6B1	8.61212e-48	3.36152	1	1	1.36752e-43	COX6B1
COX8A	1.38638e-47	3.73168	1	1	2.20144e-43	COX8A
TSC1	1.47381e-47	-4.48857	1	1	2.34026e-43	TSC1
LATS1	1.97694e-47	-4.0756	1	1	3.13918e-43	LATS1
RPS2	3.22552e-47	3.5257	1	1	5.1218e-43	RPS2
TMSB10	8.32081e-47	4.83808	1	1	1.32126e-42	TMSB10
TOMM7	1.20658e-46	4.25623	1	1	1.91593e-42	TOMM7
RPS19	1.29438e-46	3.97956	1	1	2.05535e-42	RPS19
EMC6	1.53892e-46	2.12865	1	1	2.44365e-42	EMC6
MRPL52	1.59641e-46	2.58375	1	1	2.53494e-42	MRPL52
DIABLO	1.67984e-46	-4.08739	1	1	2.66742e-42	DIABLO
RPS9	2.07023e-46	2.689	1	1	3.28732e-42	RPS9
NSA2	2.37776e-46	1.8422	1	1	3.77565e-42	NSA2
BOLA3	2.86439e-46	2.23438	1	1	4.54836e-42	BOLA3
KRT10	3.85552e-46	3.17897	1	1	6.12217e-42	KRT10
BCLAF1	4.73383e-46	-3.22495	1	1	7.51684e-42	BCLAF1
NDUFA2	5.50329e-46	2.54875	1	1	8.73867e-42	NDUFA2
FAAP20	5.52163e-46	2.00919	1	1	8.76779e-42	FAAP20
EEF1B2	9.3127e-46	2.72984	1	1	1.47876e-41	EEF1B2
ZSCAN16-AS1	1.17569e-45	1.70282	1	1	1.86688e-41	ZSCAN16-AS1
MRPL12	1.17778e-45	2.09116	1	1	1.8702e-41	MRPL12
NPM3	1.65377e-45	1.66223	1	1	2.62603e-41	NPM3
MT-ND1	1.74804e-45	3.69865	1	1	2.77571e-41	MT-ND1
RPL38	2.23732e-45	4.57192	1	1	3.55264e-41	RPL38
TAF10	2.74241e-45	1.33836	1	1	4.35467e-41	TAF10
LAMTOR2	3.06955e-45	1.88837	1	1	4.87414e-41	LAMTOR2
RPL11	3.28548e-45	3.69184	1	1	5.21701e-41	RPL11
HDDC2	4.01847e-45	1.91749	1	1	6.38093e-41	HDDC2
FAM117B	4.55851e-45	-4.20899	1	1	7.23845e-41	FAM117B
PPP1R14B	7.93346e-45	3.97063	1	1	1.25975e-40	PPP1R14B
RPL22	1.10125e-44	3.18533	1	1	1.74868e-40	RPL22
NAT14	1.20055e-44	0.866289	1	1	1.90635e-40	NAT14
ZNHIT1	1.69233e-44	2.19816	1	1	2.68726e-40	ZNHIT1
RPS14	2.10278e-44	3.2703	1	1	3.339e-40	RPS14
RPL19	2.51112e-44	3.34559	1	1	3.9874e-40	RPL19
RBAK-RBAKDN	3.5683e-44	-0.401861	1	0.75	5.66611e-40	RBAK-RBAKDN
SNHG19	4.60882e-44	2.11871	1	1	7.31834e-40	SNHG19
MANF	4.89352e-44	2.06984	1	1	7.77042e-40	MANF
MRPS36	5.43351e-44	1.8447	1	1	8.62787e-40	MRPS36
ZNF292	5.48863e-44	-3.56751	1	1	8.7154e-40	ZNF292
NDUFS6	6.00656e-44	3.30381	1	1	9.53782e-40	NDUFS6
GPX1	6.0877e-44	2.94117	1	1	9.66666e-40	GPX1
HINT1	6.91804e-44	3.83395	1	1	1.09851e-39	HINT1
MZT2B	7.86009e-44	3.10813	1	1	1.2481e-39	MZT2B
GADD45GIP1	8.85236e-44	2.34191	1	1	1.40567e-39	GADD45GIP1
ZBTB8OS	1.25887e-43	1.0124	1	1	1.99897e-39	ZBTB8OS
MRPS11	1.64571e-43	1.08633	1	1	2.61322e-39	MRPS11
MRPL51	1.80196e-43	2.64584	1	1	2.86133e-39	MRPL51
ATOX1	2.42035e-43	3.28442	1	1	3.84327e-39	ATOX1
FIS1	2.86515e-43	2.33128	1	1	4.54957e-39	FIS1
RPS27	4.09247e-43	4.87137	1	1	6.49843e-39	RPS27
ATXN7L3B	5.60122e-43	-3.26438	1	1	8.89417e-39	ATXN7L3B
MRPL17	5.65445e-43	1.2317	1	1	8.9787e-39	MRPL17
USPL1	6.23306e-43	-4.1957	1	1	9.89747e-39	USPL1
MTPAP	7.82201e-43	-3.76089	1	1	1.24206e-38	MTPAP
RPS28	8.38988e-43	5.03202	1	1	1.33223e-38	RPS28
RPL10A	9.08986e-43	2.78539	1	1	1.44338e-38	RPL10A
MRPS12	9.77309e-43	1.61812	1	1	1.55187e-38	MRPS12
IVNS1ABP	1.15998e-42	-4.01106	1	1	1.84194e-38	IVNS1ABP
ZNF121	1.28919e-42	-3.48651	1	1	2.0471e-38	ZNF121
NXF1	1.29816e-42	-3.15483	1	1	2.06134e-38	NXF1
UQCC3	1.35432e-42	1.80799	1	1	2.15053e-38	UQCC3
RPS26	1.55597e-42	3.59043	1	1	2.47073e-38	RPS26
SNHG25	1.8154e-42	2.91138	1	1	2.88267e-38	SNHG25
VPS11	1.93285e-42	-3.2675	1	1	3.06917e-38	VPS11
RPSA	3.51376e-42	2.90303	1	1	5.5795e-38	RPSA
RPL34	3.79858e-42	3.62058	1	1	6.03176e-38	RPL34
PTBP2	6.11272e-42	-5.65502	1	1	9.70639e-38	PTBP2
WDR48	6.51431e-42	-3.37492	1	1	1.03441e-37	WDR48
B3GAT3	7.43618e-42	0.990486	1	1	1.18079e-37	B3GAT3
ZNF286A	7.69927e-42	-4.68771	1	1	1.22257e-37	ZNF286A
YTHDF3	1.04751e-41	-3.2807	1	1	1.66335e-37	YTHDF3
UBR2	1.82246e-41	-3.28538	1	1	2.89389e-37	UBR2
CHCHD1	1.8834e-41	1.58036	1	1	2.99066e-37	CHCHD1
MT-ND2	2.53027e-41	3.35754	1	1	4.01781e-37	MT-ND2
AC245100.1	2.77332e-41	-1.07046	1	0.5	4.40376e-37	AC245100.1
LSM2	5.61875e-41	2.20515	1	1	8.92202e-37	LSM2
CEBPB	1.34273e-40	1.62932	1	1	2.13212e-36	CEBPB
RPS23	1.70382e-40	3.76429	1	1	2.7055e-36	RPS23
EXOC2	1.76307e-40	-3.11506	1	1	2.79958e-36	EXOC2
RIMKLB	3.14027e-40	-4.28839	1	1	4.98643e-36	RIMKLB
SF3B6	4.72865e-40	2.03629	1	1	7.50862e-36	SF3B6
RPS27L	4.78721e-40	3.80343	1	1	7.60162e-36	RPS27L
UBL5	5.78871e-40	3.324	1	1	9.1919e-36	UBL5
RPL13	5.92994e-40	3.34731	1	1	9.41614e-36	RPL13
OXLD1	6.60127e-40	1.05796	1	1	1.04822e-35	OXLD1
ZNF548	7.16581e-40	-4.38207	1	1	1.13786e-35	ZNF548
ATF7IP	9.49069e-40	-3.24907	1	1	1.50703e-35	ATF7IP
SUMO2	9.7438e-40	2.31872	1	1	1.54722e-35	SUMO2
PYM1	1.0847e-39	-0.173698	1	1	1.72239e-35	PYM1
C2CD5	1.28243e-39	-3.455	1	1	2.03636e-35	C2CD5
RPS15A	4.03042e-39	3.45914	1	1	6.39991e-35	RPS15A
PRICKLE2-AS1	4.11712e-39	-1.97118	1	0.5	6.53757e-35	PRICKLE2-AS1
CCDC85B	5.15253e-39	2.95982	1	1	8.1817e-35	CCDC85B
SERF2	9.04904e-39	3.07942	1	1	1.4369e-34	SERF2
AC009506.1	1.09504e-38	-1.43266	1	0.25	1.73882e-34	AC009506.1
ZBTB11	1.35817e-38	-3.04787	1	1	2.15664e-34	ZBTB11
CLASP2	1.47374e-38	-4.51593	1	1	2.34015e-34	CLASP2
RPLP0	1.48942e-38	2.3875	1	1	2.36505e-34	RPLP0
DEXI	1.49043e-38	0.648958	1	1	2.36665e-34	DEXI
CSTB	1.60492e-38	2.63333	1	1	2.54846e-34	CSTB
WDR19	1.67795e-38	-3.49125	1	1	2.66442e-34	WDR19
TMEM141	1.71165e-38	1.57807	1	1	2.71793e-34	TMEM141
UHRF1BP1L	1.93906e-38	-2.85402	1	1	3.07903e-34	UHRF1BP1L
SNX27	2.25202e-38	-3.406	1	1	3.57599e-34	SNX27
SDHAF4	2.80835e-38	-0.752152	1	1	4.45937e-34	SDHAF4
AC002456.2	4.11769e-38	-0.847018	0.931	0.75	6.53847e-34	AC002456.2
APRT	4.95894e-38	1.99572	1	1	7.87429e-34	APRT
BCL7C	6.27934e-38	1.67286	1	1	9.97097e-34	BCL7C
TMUB1	6.33057e-38	1.33997	1	1	1.00523e-33	TMUB1
ZNF250	6.62777e-38	-3.32398	1	1	1.05242e-33	ZNF250
NGRN	8.09636e-38	-4.47267	1	1	1.28562e-33	NGRN
HINFP	8.10048e-38	-2.86705	1	1	1.28627e-33	HINFP
HAX1	9.95351e-38	0.997608	1	1	1.58052e-33	HAX1
SLC9A3R2	1.04314e-37	0.56887	1	1	1.65641e-33	SLC9A3R2
ZNF304	1.14859e-37	-3.55732	1	1	1.82384e-33	ZNF304
CDT1	1.41827e-37	0.126441	1	1	2.25208e-33	CDT1
DMTF1	1.54059e-37	-3.21519	1	1	2.4463e-33	DMTF1
MTG1	1.57343e-37	-3.25234	1	1	2.49845e-33	MTG1
TADA1	2.23158e-37	-3.81018	1	1	3.54353e-33	TADA1
IPO11	2.38008e-37	-2.68113	1	1	3.77933e-33	IPO11
RPL8	3.15188e-37	2.66192	1	1	5.00487e-33	RPL8
RPL23	3.40921e-37	3.42913	1	1	5.41348e-33	RPL23
NAA38	4.70763e-37	2.80191	1	1	7.47525e-33	NAA38
AC159540.1	5.39699e-37	-1.28905	1	0	8.56987e-33	AC159540.1
PFDN6	5.98148e-37	1.21531	1	1	9.498e-33	PFDN6
TMEM219	6.24908e-37	1.25463	1	1	9.92291e-33	TMEM219
UQCRB	6.46182e-37	2.79363	1	1	1.02607e-32	UQCRB
HOXD-AS2	7.23454e-37	-0.658338	0.931	0.25	1.14877e-32	HOXD-AS2
ARSJ	7.61067e-37	1.01224	1	0.75	1.2085e-32	ARSJ
EIF3K	8.36177e-37	1.89309	1	1	1.32777e-32	EIF3K
C15orf61	8.81273e-37	0.647532	1	1	1.39937e-32	C15orf61
OST4	9.35665e-37	3.21714	1	1	1.48574e-32	OST4
INO80D	1.58991e-36	-3.79589	1	1	2.52461e-32	INO80D
COX7A2	1.84225e-36	2.92884	1	1	2.92531e-32	COX7A2
FOXD3-AS1	2.07375e-36	-0.389343	1	0.5	3.29291e-32	FOXD3-AS1
PER2	2.3411e-36	-4.91222	1	1	3.71743e-32	PER2
GNG5	2.40464e-36	2.85867	1	1	3.81833e-32	GNG5
S100A6	2.83806e-36	6.65482	1	1	4.50656e-32	S100A6
CBLL1	3.51646e-36	-3.05309	1	1	5.58379e-32	CBLL1
LAMTOR1	3.78264e-36	1.12022	1	1	6.00645e-32	LAMTOR1
RPA3	4.88932e-36	2.83586	1	1	7.76376e-32	RPA3
MRPL11	5.40527e-36	1.61031	1	1	8.58303e-32	MRPL11
BRD8	6.30592e-36	-3.06806	1	1	1.00132e-31	BRD8
INTS7	7.54296e-36	-3.09305	1	1	1.19775e-31	INTS7
RPS8	8.46761e-36	3.11081	1	1	1.34457e-31	RPS8
CHD2	8.94287e-36	-3.33707	1	1	1.42004e-31	CHD2
NENF	9.30849e-36	2.86999	1	1	1.47809e-31	NENF
AGO1	1.66703e-35	-3.82251	1	1	2.64708e-31	AGO1
RBM4	1.78428e-35	-3.46966	1	1	2.83326e-31	RBM4
DEDD	2.33897e-35	-2.63962	1	1	3.71404e-31	DEDD
MT-CO3	2.52961e-35	2.6001	1	1	4.01677e-31	MT-CO3
NAA10	3.1394e-35	1.95521	1	1	4.98506e-31	NAA10
PTRHD1	3.21233e-35	1.25298	1	1	5.10086e-31	PTRHD1
TIMM9	3.23858e-35	1.25041	1	1	5.14254e-31	TIMM9
SF3B1	3.37829e-35	-3.07306	1	1	5.36438e-31	SF3B1
EN1	3.38372e-35	0.200387	0.931	1	5.37301e-31	EN1
HOXC13	3.70204e-35	-1.92046	0.517	0	5.87847e-31	HOXC13
SLC2A4RG	4.25869e-35	1.16149	1	1	6.76237e-31	SLC2A4RG
CCDC106	4.28353e-35	0.808873	1	1	6.80182e-31	CCDC106
TP53BP1	4.29224e-35	-4.02817	1	1	6.81564e-31	TP53BP1
POLR2L	4.94185e-35	3.52798	1	1	7.84716e-31	POLR2L
PIGP	5.08889e-35	0.784589	1	1	8.08065e-31	PIGP
RPS29	5.29076e-35	5.06094	1	1	8.4012e-31	RPS29
CTU1	6.10655e-35	-1.01336	1	1	9.69658e-31	CTU1
RPS3A	6.23793e-35	2.59757	1	1	9.90521e-31	RPS3A
SNHG9	6.71407e-35	2.17559	1	1	1.06613e-30	SNHG9
RBM19	6.83399e-35	-3.09612	1	1	1.08517e-30	RBM19
COX14	9.07718e-35	2.06919	1	1	1.44137e-30	COX14
ZNF451	1.1859e-34	-3.01168	1	1	1.88309e-30	ZNF451
UBAC1	1.29879e-34	0.825954	1	1	2.06234e-30	UBAC1
LCOR	1.6414e-34	-3.57643	1	1	2.60639e-30	LCOR
RPS4X	1.6432e-34	3.0094	1	1	2.60924e-30	RPS4X
TTC4	1.704e-34	-3.48949	1	1	2.70579e-30	TTC4
SMDT1	1.74154e-34	1.46148	1	1	2.7654e-30	SMDT1
BLOC1S1	2.32889e-34	2.17573	1	1	3.69805e-30	BLOC1S1
ARL6IP4	2.47071e-34	2.16707	1	1	3.92323e-30	ARL6IP4
MZT2A	2.70893e-34	2.39003	1	1	4.30151e-30	MZT2A
GPX4	3.15315e-34	2.99234	1	1	5.00689e-30	GPX4
NDUFB7	3.22095e-34	2.51654	1	1	5.11455e-30	NDUFB7
RPS24	3.36105e-34	3.63022	1	1	5.33701e-30	RPS24
RABGEF1	3.36341e-34	-3.17535	1	1	5.34077e-30	RABGEF1
RPS18	3.41226e-34	3.60312	1	1	5.41833e-30	RPS18
VPS13B	3.64818e-34	-3.51596	1	1	5.79295e-30	VPS13B
ZKSCAN8	4.05219e-34	-3.88095	1	1	6.43447e-30	ZKSCAN8
UAP1L1	4.56273e-34	-1.02658	1	1	7.24515e-30	UAP1L1
RNF185	4.80495e-34	-3.2318	1	1	7.62979e-30	RNF185
MTIF3	5.1675e-34	1.08632	1	1	8.20547e-30	MTIF3
EXOSC10	5.72176e-34	-3.23904	1	1	9.08558e-30	EXOSC10
POLR3K	5.93179e-34	1.53606	1	1	9.41909e-30	POLR3K
PPP4R3B	6.41903e-34	-2.43136	1	1	1.01928e-29	PPP4R3B
BCL2L12	6.74813e-34	0.495563	1	1	1.07153e-29	BCL2L12
COMMD6	6.76656e-34	2.88481	1	1	1.07446e-29	COMMD6
ANP32B	9.70744e-34	1.93569	1	1	1.54144e-29	ANP32B
NDUFC1	1.04441e-33	2.47132	1	1	1.65842e-29	NDUFC1
SSR4	1.16007e-33	2.11906	1	1	1.84208e-29	SSR4
DPF2	1.30386e-33	-3.10676	1	1	2.0704e-29	DPF2
RBM38	1.39567e-33	0.353561	1	1	2.21619e-29	RBM38
USP15	1.40364e-33	-2.95778	1	1	2.22884e-29	USP15
COX5A	1.52945e-33	2.28327	1	1	2.42861e-29	COX5A
ARPC1B	1.74342e-33	2.82619	1	1	2.76837e-29	ARPC1B
PSMA7	1.74877e-33	2.00358	1	1	2.77687e-29	PSMA7
TRMT112	1.83033e-33	2.59207	1	1	2.90637e-29	TRMT112
SSNA1	2.21422e-33	1.87063	1	1	3.51596e-29	SSNA1
PBRM1	2.60685e-33	-2.44385	1	1	4.13942e-29	PBRM1
MRPL36	2.72956e-33	1.91734	1	1	4.33426e-29	MRPL36
POLR2J	2.85885e-33	2.48145	1	1	4.53957e-29	POLR2J
RIC8B	2.98406e-33	-2.74091	1	1	4.73838e-29	RIC8B
PHC3	3.02025e-33	-4.14323	1	1	4.79586e-29	PHC3
ST20	3.1609e-33	0.734356	1	1	5.01919e-29	ST20
ZNF638	3.20625e-33	-3.28177	1	1	5.0912e-29	ZNF638
TRAFD1	3.51967e-33	-3.0105	1	1	5.58888e-29	TRAFD1
NDUFS8	3.98333e-33	1.75678	1	1	6.32513e-29	NDUFS8
S100A11	4.18628e-33	4.26215	1	1	6.64739e-29	S100A11
KIDINS220	4.84185e-33	-3.67105	1	1	7.68837e-29	KIDINS220
PRR7-AS1	5.10096e-33	-1.32087	1	0.75	8.09981e-29	PRR7-AS1
TSR3	6.00815e-33	1.045	1	1	9.54035e-29	TSR3
RPL13A	7.70082e-33	3.11092	1	1	1.22281e-28	RPL13A
TIMM13	8.87158e-33	2.1011	1	1	1.40872e-28	TIMM13
ETHE1	1.00362e-32	0.555235	1	1	1.59364e-28	ETHE1
COX6C	1.12624e-32	3.49326	1	1	1.78836e-28	COX6C
C8orf82	1.35399e-32	0.812251	1	1	2.15e-28	C8orf82
ZFAS1	1.46927e-32	2.97573	1	1	2.33305e-28	ZFAS1
ZDHHC17	1.69073e-32	-3.15264	1	1	2.68471e-28	ZDHHC17
TMEM258	1.84277e-32	2.70085	1	1	2.92614e-28	TMEM258
CSNK2B	1.93696e-32	1.00921	1	1	3.0757e-28	CSNK2B
MRPL57	2.36534e-32	1.73378	1	1	3.75592e-28	MRPL57
MRPL20	2.43527e-32	2.13842	1	1	3.86696e-28	MRPL20
PURA	2.47241e-32	0.356553	1	1	3.92594e-28	PURA
SHOX2	2.86835e-32	-0.958934	1	0.5	4.55466e-28	SHOX2
UQCR10	3.41928e-32	2.98112	1	1	5.42948e-28	UQCR10
TMEM184C	4.82199e-32	-3.12178	1	1	7.65684e-28	TMEM184C
LSM3	5.78231e-32	2.53346	1	1	9.18173e-28	LSM3
GORASP1	6.59176e-32	-2.99753	1	1	1.04671e-27	GORASP1
OGT	6.75889e-32	-3.43769	1	1	1.07324e-27	OGT
SSBP1	7.37858e-32	2.27367	1	1	1.17164e-27	SSBP1
MPG	7.79424e-32	1.82231	1	1	1.23765e-27	MPG
ISOC2	7.79785e-32	1.66719	1	1	1.23822e-27	ISOC2
MGAT4B	8.47396e-32	0.852238	1	1	1.34558e-27	MGAT4B
MTRNR2L8	8.90571e-32	0.706148	1	0.75	1.41414e-27	MTRNR2L8
HIGD2A	1.2089e-31	2.31486	1	1	1.91961e-27	HIGD2A
BANF1	1.2475e-31	1.32667	1	1	1.9809e-27	BANF1
RUBCN	1.3775e-31	-3.3012	1	1	2.18732e-27	RUBCN
WDR83OS	2.08345e-31	1.64437	1	1	3.30831e-27	WDR83OS
PRDX6	2.15303e-31	2.0756	1	1	3.41879e-27	PRDX6
PFDN2	2.33927e-31	2.32787	1	1	3.71452e-27	PFDN2
DRAP1	2.34763e-31	2.41294	1	1	3.7278e-27	DRAP1
PPP2R5D	2.51172e-31	-3.02604	1	1	3.98836e-27	PPP2R5D
BRAF	2.63117e-31	-3.04411	1	1	4.17804e-27	BRAF
GPCPD1	3.57711e-31	-3.61521	1	1	5.6801e-27	GPCPD1
MT-ND4	3.67593e-31	2.41817	1	1	5.83702e-27	MT-ND4
ANAPC11	4.43944e-31	2.65527	1	1	7.04938e-27	ANAPC11
NQO1	5.07603e-31	2.47371	1	1	8.06023e-27	NQO1
FTO	5.29469e-31	-3.68791	1	1	8.40743e-27	FTO
VPS45	5.87698e-31	-2.99733	1	1	9.33205e-27	VPS45
NDUFAF3	6.13926e-31	1.94856	1	1	9.74853e-27	NDUFAF3
LSM7	6.54469e-31	2.73185	1	1	1.03923e-26	LSM7
AGPAT2	6.93812e-31	0.640555	1	1	1.1017e-26	AGPAT2
NDUFB9	8.55792e-31	1.90273	1	1	1.35891e-26	NDUFB9
STX10	9.6409e-31	0.91019	1	1	1.53088e-26	STX10
FHL3	1.03744e-30	-0.21521	1	1	1.64735e-26	FHL3
GEMIN6	1.07052e-30	0.435344	1	1	1.69987e-26	GEMIN6
SAC3D1	1.09331e-30	1.33595	1	1	1.73606e-26	SAC3D1
TRIM56	1.16441e-30	1.13203	1	1	1.84897e-26	TRIM56
MAGOH	1.17024e-30	1.36899	1	1	1.85822e-26	MAGOH
HOXD11	1.25318e-30	-0.695331	0.862	0	1.98992e-26	HOXD11
YTHDF3-AS1	1.40777e-30	-0.834478	1	1	2.23539e-26	YTHDF3-AS1
PTMA	1.49143e-30	2.49983	1	1	2.36824e-26	PTMA
PIAS1	1.49714e-30	-2.96719	1	1	2.37731e-26	PIAS1
DEPDC5	1.55806e-30	-3.82812	1	1	2.47405e-26	DEPDC5
MAZ	1.89684e-30	1.31523	1	1	3.01199e-26	MAZ
IFI27L1	1.96126e-30	0.81706	1	1	3.11429e-26	IFI27L1
NUDT22	2.01955e-30	0.798147	1	1	3.20685e-26	NUDT22
NOP10	2.42888e-30	2.59777	1	1	3.85682e-26	NOP10
RPL18A	2.51446e-30	3.49682	1	1	3.99272e-26	RPL18A
URI1	2.61449e-30	1.00565	1	1	4.15155e-26	URI1
SERINC1	2.62042e-30	-4.21462	1	1	4.16096e-26	SERINC1
EEF1D	3.01724e-30	1.73877	1	1	4.79108e-26	EEF1D
ARNT	3.13391e-30	-3.1643	1	1	4.97634e-26	ARNT
KIAA1109	3.68685e-30	-3.07053	1	1	5.85435e-26	KIAA1109
MAP2K2	4.67922e-30	1.58292	1	1	7.43013e-26	MAP2K2
CD63	4.79828e-30	3.34738	1	1	7.61919e-26	CD63
PGP	4.87286e-30	1.62828	1	1	7.73761e-26	PGP
EDC3	4.98289e-30	-3.12324	1	1	7.91234e-26	EDC3
NDUFA4	5.16731e-30	3.31556	1	1	8.20517e-26	NDUFA4
POLR2I	5.19858e-30	2.32219	1	1	8.25482e-26	POLR2I
RPL27	6.09505e-30	3.50563	1	1	9.67833e-26	RPL27
POLR2F	6.97499e-30	2.25338	1	1	1.10756e-25	POLR2F
COMMD4	7.09318e-30	0.988393	1	1	1.12633e-25	COMMD4
RPS25	7.13285e-30	3.65145	1	1	1.13263e-25	RPS25
PGLS	7.33982e-30	1.69871	1	1	1.16549e-25	PGLS
SEC24B	7.51241e-30	-3.3879	1	1	1.1929e-25	SEC24B
AURKAIP1	7.79673e-30	2.28342	1	1	1.23804e-25	AURKAIP1
FBXO3	8.03528e-30	-2.82403	1	1	1.27592e-25	FBXO3
SMG7	8.33097e-30	-3.0977	1	1	1.32287e-25	SMG7
MT2A	8.81564e-30	5.46823	1	1	1.39983e-25	MT2A
C12orf57	1.09123e-29	2.18192	1	1	1.73277e-25	C12orf57
C2orf76	1.11036e-29	0.00932094	1	1	1.76315e-25	C2orf76
EMP3	1.12084e-29	2.72035	1	1	1.77978e-25	EMP3
UQCR11	1.22462e-29	3.29505	1	1	1.94457e-25	UQCR11
CCNI	1.40513e-29	1.58853	1	1	2.23121e-25	CCNI
UQCRQ	1.58579e-29	2.89944	1	1	2.51807e-25	UQCRQ
VTA1	1.615e-29	-3.39307	1	1	2.56446e-25	VTA1
PNKD	1.62694e-29	1.30079	1	1	2.58342e-25	PNKD
NDUFA1	1.64175e-29	2.82428	1	1	2.60694e-25	NDUFA1
STT3A	1.75557e-29	-2.78235	1	1	2.78767e-25	STT3A
SNRPB2	2.00668e-29	2.39568	1	1	3.1864e-25	SNRPB2
TBCCD1	2.08237e-29	-3.33387	1	1	3.3066e-25	TBCCD1
EMSY	2.10172e-29	-2.75326	1	1	3.33733e-25	EMSY
SMU1	2.44606e-29	-3.10179	1	1	3.8841e-25	SMU1
IRAK1	2.83172e-29	0.976178	1	1	4.49649e-25	IRAK1
TOMM40	3.23263e-29	1.24951	1	1	5.13309e-25	TOMM40
CLK4	3.84587e-29	-3.31343	1	1	6.10686e-25	CLK4
GGCT	3.93215e-29	1.9584	1	1	6.24385e-25	GGCT
MXD1	4.00546e-29	-4.65559	1	1	6.36026e-25	MXD1
KIAA1586	4.39721e-29	-2.97584	1	1	6.98234e-25	KIAA1586
AASS	4.46785e-29	-4.34742	1	1	7.09449e-25	AASS
CMSS1	5.4668e-29	1.81847	1	1	8.68073e-25	CMSS1
LTN1	5.77783e-29	-2.50962	1	1	9.17462e-25	LTN1
XPR1	6.13452e-29	-3.70174	1	1	9.741e-25	XPR1
MED11	7.41244e-29	0.179783	1	1	1.17702e-24	MED11
CHST12	7.52138e-29	0.60943	1	1	1.19432e-24	CHST12
SRCAP	8.07497e-29	-5.27447	0.966	1	1.28222e-24	SRCAP
MALSU1	8.46813e-29	1.96358	1	1	1.34465e-24	MALSU1
HDGF	1.29472e-28	1.5765	1	1	2.05588e-24	HDGF
CLPP	1.44457e-28	1.24929	1	1	2.29384e-24	CLPP
MATR3	1.57073e-28	-7.73077	0.793	1	2.49417e-24	MATR3
KANSL2	1.86544e-28	-3.32028	1	1	2.96214e-24	KANSL2
IKZF5	1.90177e-28	-3.4154	1	1	3.01983e-24	IKZF5
TOMM22	2.17441e-28	1.49978	1	1	3.45274e-24	TOMM22
SNRPE	2.50671e-28	2.489	1	1	3.9804e-24	SNRPE
RPL21	2.58704e-28	3.21259	1	1	4.10795e-24	RPL21
C1orf53	2.61121e-28	-0.631837	1	1	4.14635e-24	C1orf53
ZNF358	2.77637e-28	0.694139	1	1	4.4086e-24	ZNF358
RBX1	3.08133e-28	2.42267	1	1	4.89284e-24	RBX1
TRADD	3.08273e-28	-0.397539	1	0.75	4.89507e-24	TRADD
MRPL23	3.16135e-28	1.4916	1	1	5.0199e-24	MRPL23
NDUFB3	3.66827e-28	2.4163	1	1	5.82484e-24	NDUFB3
METTL14	3.69287e-28	-2.36175	1	1	5.8639e-24	METTL14
ARPC1A	3.84392e-28	1.83926	1	1	6.10377e-24	ARPC1A
RLIM	4.55195e-28	-3.34385	1	1	7.22804e-24	RLIM
BTAF1	4.5832e-28	-3.79881	1	1	7.27767e-24	BTAF1
RPS11	5.16049e-28	2.81421	1	1	8.19434e-24	RPS11
SBNO1	5.82512e-28	-2.83677	1	1	9.2497e-24	SBNO1
CCDC34	5.86525e-28	1.96993	1	1	9.31343e-24	CCDC34
HOXA10	6.8581e-28	0.13781	0.897	0	1.089e-23	HOXA10
SNRPF	7.08456e-28	2.5289	1	1	1.12496e-23	SNRPF
CHCHD5	7.28614e-28	1.20452	1	1	1.15697e-23	CHCHD5
SEC11A	7.33977e-28	1.47195	1	1	1.16548e-23	SEC11A
MRPL54	7.53763e-28	1.68173	1	1	1.1969e-23	MRPL54
PPIP5K2	7.56605e-28	-2.79876	1	1	1.20141e-23	PPIP5K2
RAB30	9.29125e-28	-4.1275	1	1	1.47536e-23	RAB30
C9orf16	1.00061e-27	2.58828	1	1	1.58887e-23	C9orf16
LGALS1	1.17452e-27	5.02676	1	1	1.86502e-23	LGALS1
BRK1	1.18449e-27	1.59331	1	1	1.88085e-23	BRK1
MINCR	1.29847e-27	0.585799	1	1	2.06184e-23	MINCR
ZNF654	1.34297e-27	-3.8766	1	1	2.1325e-23	ZNF654
ZNF10	1.42512e-27	-3.33355	0.966	1	2.26295e-23	ZNF10
LINC00467	1.45795e-27	0.557864	1	1	2.31507e-23	LINC00467
NDUFB2	1.59899e-27	2.80434	1	1	2.53904e-23	NDUFB2
RANBP6	1.84093e-27	-3.85844	1	1	2.92321e-23	RANBP6
HACE1	1.98085e-27	-3.23262	1	1	3.14538e-23	HACE1
MRPL33	2.0116e-27	3.20257	1	1	3.19422e-23	MRPL33
SLC2A1-AS1	2.13953e-27	-1.86988	0.966	0.5	3.39735e-23	SLC2A1-AS1
PCDHGC3	2.21145e-27	-6.13739	1	1	3.51156e-23	PCDHGC3
MRPS34	2.25163e-27	1.51615	1	1	3.57537e-23	MRPS34
SYNE2	2.25753e-27	-3.80458	1	1	3.58473e-23	SYNE2
NDUFA11	2.56882e-27	2.1607	1	1	4.07902e-23	NDUFA11
IDH1-AS1	2.69539e-27	-1.29505	1	1	4.28e-23	IDH1-AS1
LAMP1	3.00464e-27	1.49378	1	1	4.77107e-23	LAMP1
LINC00630	3.10716e-27	-3.38398	0.897	1	4.93386e-23	LINC00630
TATDN1	3.18267e-27	0.793238	1	1	5.05376e-23	TATDN1
LRRC7	3.94799e-27	-5.45965	0.897	1	6.26901e-23	LRRC7
ORAI2	4.37935e-27	0.895631	1	1	6.95397e-23	ORAI2
MRPL47	4.40126e-27	1.20937	1	1	6.98877e-23	MRPL47
LAMTOR4	4.59697e-27	2.44431	1	1	7.29953e-23	LAMTOR4
ZNF300	4.65576e-27	-3.81899	1	1	7.39288e-23	ZNF300
HRAS	4.67137e-27	1.87052	1	1	7.41767e-23	HRAS
INTS4	4.96616e-27	-2.97843	1	1	7.88576e-23	INTS4
ATP2A1-AS1	5.73158e-27	-0.230813	1	1	9.10117e-23	ATP2A1-AS1
KIF5A	6.38295e-27	-5.32957	0.966	1	1.01355e-22	KIF5A
RUSC2	6.54562e-27	-4.57307	1	1	1.03938e-22	RUSC2
HAUS5	7.03642e-27	-2.9657	1	1	1.11731e-22	HAUS5
ZBTB33	7.36645e-27	-3.40887	1	1	1.16972e-22	ZBTB33
PSEN1	7.39721e-27	-3.08692	1	1	1.1746e-22	PSEN1
LSM5	7.41286e-27	2.65815	1	1	1.17709e-22	LSM5
DAZAP1	8.9853e-27	0.617882	1	1	1.42678e-22	DAZAP1
PITX1	8.99703e-27	1.6027	1	0.5	1.42864e-22	PITX1
MAPK1IP1L	9.86448e-27	-2.4853	1	1	1.56638e-22	MAPK1IP1L
HOXD8	1.06937e-26	-1.37028	0.931	0	1.69806e-22	HOXD8
COX7B	1.09168e-26	2.6937	1	1	1.73348e-22	COX7B
IMMP1L	1.10462e-26	1.06601	1	1	1.75403e-22	IMMP1L
POGZ	1.11647e-26	-3.28271	1	1	1.77285e-22	POGZ
HOXD10	1.22066e-26	-1.42487	0.862	0	1.93828e-22	HOXD10
TMEM54	1.22524e-26	1.20685	1	1	1.94556e-22	TMEM54
ARRDC3	1.39486e-26	-5.48576	1	1	2.2149e-22	ARRDC3
NHLRC2	1.4176e-26	-3.6574	1	1	2.25101e-22	NHLRC2
HOXD9	1.48642e-26	-1.82978	0.897	0	2.36028e-22	HOXD9
YBEY	1.57068e-26	0.364953	1	1	2.49408e-22	YBEY
ZNF407	1.58576e-26	-3.32422	1	1	2.51803e-22	ZNF407
PRR34-AS1	1.61035e-26	1.01288	1	1	2.55708e-22	PRR34-AS1
SWI5	1.86823e-26	1.24114	1	1	2.96657e-22	SWI5
NDUFB11	1.87007e-26	1.97722	1	1	2.96948e-22	NDUFB11
TULP4	2.65384e-26	-3.77549	1	1	4.21404e-22	TULP4
PIN4	2.66531e-26	1.71594	1	1	4.23225e-22	PIN4
TMEM126B	2.78801e-26	0.795618	1	1	4.42708e-22	TMEM126B
MRPS14	2.88539e-26	0.370035	1	1	4.58171e-22	MRPS14
AP1S1	3.03845e-26	1.62677	1	1	4.82476e-22	AP1S1
UBE2Q1	3.41648e-26	0.629648	1	1	5.42502e-22	UBE2Q1
CCDC93	3.42051e-26	-4.0445	1	1	5.43142e-22	CCDC93
COA6	3.4738e-26	1.24292	1	1	5.51605e-22	COA6
TLX1	3.69442e-26	-2.10102	0.414	0	5.86637e-22	TLX1
WDFY1	3.89718e-26	-2.76611	1	1	6.18833e-22	WDFY1
UBE4A	3.96866e-26	-2.80515	1	1	6.30184e-22	UBE4A
CLDND1	4.18049e-26	-2.77649	1	1	6.6382e-22	CLDND1
SLC52A2	4.3893e-26	0.553262	1	1	6.96977e-22	SLC52A2
RPL22L1	4.6029e-26	3.04236	1	1	7.30894e-22	RPL22L1
AAMDC	5.14946e-26	1.22477	1	1	8.17683e-22	AAMDC
RBM6	5.35042e-26	-3.23628	1	1	8.49594e-22	RBM6
DTYMK	5.38185e-26	1.88211	1	1	8.54584e-22	DTYMK
BTRC	5.60168e-26	-3.57249	1	1	8.8949e-22	BTRC
COX5B	5.82682e-26	2.54817	1	1	9.25241e-22	COX5B
NDUFA3	6.03331e-26	2.83326	1	1	9.58029e-22	NDUFA3
NKAP	6.59031e-26	0.615207	1	1	1.04648e-21	NKAP
TMEM126A	6.60219e-26	1.15942	1	1	1.04836e-21	TMEM126A
ENDOG	6.76989e-26	0.564069	1	1	1.07499e-21	ENDOG
UBTD1	6.9685e-26	0.841858	1	1	1.10653e-21	UBTD1
ITGAE	7.19239e-26	2.09746	1	1	1.14208e-21	ITGAE
RAD52	7.44469e-26	-3.59579	1	1	1.18214e-21	RAD52
MIEN1	7.64654e-26	1.41259	1	1	1.21419e-21	MIEN1
BAX	8.47349e-26	2.49921	1	1	1.3455e-21	BAX
TXNDC17	8.69957e-26	2.16802	1	1	1.38141e-21	TXNDC17
YBX1	9.96802e-26	2.01243	1	1	1.58282e-21	YBX1
AP006621.5	1.0043e-25	-0.343567	1	0.75	1.59472e-21	AP006621.5
RPS10	1.01212e-25	2.6436	1	1	1.60715e-21	RPS10
BATF3	1.05746e-25	-0.0106074	1	0.75	1.67914e-21	BATF3
ZNF593	1.10881e-25	1.38975	1	1	1.76068e-21	ZNF593
HMGN4	1.13179e-25	-4.1686	1	1	1.79716e-21	HMGN4
MRPL40	1.30833e-25	1.2446	1	1	2.0775e-21	MRPL40
RNF126	1.32151e-25	0.94482	1	1	2.09843e-21	RNF126
HOMER3	1.39032e-25	1.09775	1	1	2.20769e-21	HOMER3
TIA1	1.67952e-25	-2.86314	1	1	2.66692e-21	TIA1
PFDN5	1.68518e-25	1.85076	1	1	2.6759e-21	PFDN5
KLHL28	1.81053e-25	-3.92546	1	1	2.87495e-21	KLHL28
ECI1	1.82017e-25	1.43769	1	1	2.89024e-21	ECI1
RPL10	1.86364e-25	2.39171	1	1	2.95928e-21	RPL10
PSMA6	1.93762e-25	-3.09726	1	1	3.07675e-21	PSMA6
MYNN	2.02881e-25	-2.87994	1	1	3.22155e-21	MYNN
TPT1	2.49424e-25	3.01871	1	1	3.96061e-21	TPT1
POP7	2.69342e-25	1.72617	1	1	4.27688e-21	POP7
SRSF6	2.97503e-25	-4.01939	1	1	4.72404e-21	SRSF6
HINT2	3.05721e-25	1.77601	1	1	4.85454e-21	HINT2
METTL23	3.16156e-25	0.591033	1	1	5.02025e-21	METTL23
CMC1	3.22756e-25	1.19759	1	1	5.12505e-21	CMC1
WASF1	3.30899e-25	-3.62316	1	1	5.25434e-21	WASF1
ETV2	3.52832e-25	-1.5395	1	1	5.60262e-21	ETV2
ZSCAN25	3.53156e-25	-3.17994	1	1	5.60776e-21	ZSCAN25
PRPF39	3.64968e-25	-3.42447	1	1	5.79532e-21	PRPF39
DCP1A	4.08016e-25	-2.72759	1	1	6.47889e-21	DCP1A
AP3D1	4.21577e-25	0.68386	1	1	6.69422e-21	AP3D1
ZBTB21	4.31766e-25	-3.23592	1	1	6.85601e-21	ZBTB21
UBXN2B	4.47384e-25	-3.11142	1	1	7.104e-21	UBXN2B
DNAJC27	4.9209e-25	-3.61495	1	1	7.81389e-21	DNAJC27
RANBP10	6.23146e-25	-3.37379	1	1	9.89494e-21	RANBP10
SETBP1	6.35869e-25	-4.10834	1	1	1.0097e-20	SETBP1
ZNF644	6.5136e-25	-2.61067	1	1	1.03429e-20	ZNF644
BRWD1	6.76355e-25	-2.77836	1	1	1.07398e-20	BRWD1
PCBD1	6.95352e-25	1.32763	1	1	1.10415e-20	PCBD1
ANKRD27	7.19588e-25	-2.94062	1	1	1.14263e-20	ANKRD27
EBPL	8.1515e-25	1.52627	1	1	1.29438e-20	EBPL
ABHD17A	8.59215e-25	0.999037	1	1	1.36435e-20	ABHD17A
RAB11B-AS1	9.29086e-25	-0.52453	1	1	1.4753e-20	RAB11B-AS1
RPL15	9.43171e-25	2.16296	1	1	1.49766e-20	RPL15
XRN1	1.0221e-24	-2.82475	1	1	1.623e-20	XRN1
BAG4	1.02566e-24	-3.22917	1	1	1.62865e-20	BAG4
RPS5	1.09972e-24	2.48139	1	1	1.74625e-20	RPS5
BBS1	1.14823e-24	-3.67402	1	1	1.82327e-20	BBS1
NDUFS5	1.17242e-24	2.50472	1	1	1.86168e-20	NDUFS5
HMGCS1	1.35112e-24	-5.58596	1	1	2.14545e-20	HMGCS1
ATF2	1.39294e-24	-2.7637	1	1	2.21185e-20	ATF2
C18orf25	1.4052e-24	-3.3031	1	1	2.23132e-20	C18orf25
FOXD1	1.57407e-24	0.256785	0.931	0.5	2.49947e-20	FOXD1
CTDNEP1	1.62685e-24	1.34835	1	1	2.58328e-20	CTDNEP1
APBB1	1.63502e-24	-3.51948	1	1	2.59624e-20	APBB1
NHSL1	1.73961e-24	-4.15567	1	1	2.76233e-20	NHSL1
CNOT8	1.78608e-24	-2.54389	1	1	2.83612e-20	CNOT8
ZNF142	1.89503e-24	-3.94081	1	1	3.00911e-20	ZNF142
NDUFAB1	2.02315e-24	1.89753	1	1	3.21257e-20	NDUFAB1
ARMC8	2.2914e-24	-2.26112	1	1	3.63852e-20	ARMC8
HOXC10	2.45209e-24	-0.537924	0.862	0.5	3.89367e-20	HOXC10
COX4I1	2.50576e-24	1.92758	1	1	3.9789e-20	COX4I1
DAPL1	2.86946e-24	-1.21502	1	0.75	4.55642e-20	DAPL1
PHLDA2	2.91737e-24	2.66903	0.966	0.75	4.63249e-20	PHLDA2
KAT6B	3.12307e-24	-3.92862	1	1	4.95913e-20	KAT6B
ELMO2	3.49492e-24	-3.39647	1	1	5.54958e-20	ELMO2
RBM34	3.58036e-24	-2.90891	1	1	5.68526e-20	RBM34
RPS3	3.6419e-24	2.30955	1	1	5.78297e-20	RPS3
UBE2V1	3.81126e-24	-4.41878	1	1	6.0519e-20	UBE2V1
RAC1	3.83963e-24	2.87766	1	1	6.09695e-20	RAC1
ZNF787	3.95182e-24	-0.138965	1	0.75	6.27509e-20	ZNF787
NUDT1	4.2573e-24	2.10315	1	1	6.76016e-20	NUDT1
TIMM10	5.24194e-24	1.89444	1	1	8.32368e-20	TIMM10
ARPC3	5.97594e-24	2.04795	1	1	9.4892e-20	ARPC3
ECD	6.51468e-24	-3.14189	1	1	1.03447e-19	ECD
SOD3	6.73712e-24	1.52354	0.931	0.5	1.06979e-19	SOD3
SPCS1	6.85809e-24	1.30319	1	1	1.089e-19	SPCS1
RPS6	7.78351e-24	2.45614	1	1	1.23594e-19	RPS6
TCERG1	8.06994e-24	-2.65437	1	1	1.28143e-19	TCERG1
TIMM8B	8.07372e-24	2.04288	1	1	1.28203e-19	TIMM8B
EEF2KMT	8.39427e-24	-0.0193557	1	1	1.33293e-19	EEF2KMT
MRPL38	8.52156e-24	-3.95535	0.966	1	1.35314e-19	MRPL38
RPL31	8.52197e-24	2.97682	1	1	1.3532e-19	RPL31
PIK3R4	8.93666e-24	-3.20357	1	1	1.41905e-19	PIK3R4
CORO1C	9.37886e-24	-3.13661	1	1	1.48927e-19	CORO1C
MXRA7	1.02187e-23	1.21303	1	1	1.62262e-19	MXRA7
ANKRD36	1.08802e-23	-4.05711	1	1	1.72767e-19	ANKRD36
FTX	1.10573e-23	-4.29282	1	1	1.75579e-19	FTX
LSM1	1.14453e-23	1.14605	1	1	1.81741e-19	LSM1
ITPRIPL2	1.16011e-23	-0.172934	1	1	1.84214e-19	ITPRIPL2
CASP2	1.18331e-23	-3.26471	1	1	1.87897e-19	CASP2
ORAI1	1.19037e-23	0.441727	1	1	1.89019e-19	ORAI1
CERS5	1.28157e-23	-2.80098	1	1	2.035e-19	CERS5
RBM4B	1.29264e-23	-2.74466	1	1	2.05258e-19	RBM4B
FBXO21	1.44352e-23	-2.75309	1	1	2.29216e-19	FBXO21
PISD	1.45388e-23	-3.19432	1	1	2.30862e-19	PISD
LAGE3	1.48663e-23	1.84437	1	1	2.36061e-19	LAGE3
PPIH	1.50733e-23	0.660052	1	1	2.39349e-19	PPIH
LY96	1.58885e-23	0.437086	0.966	0.75	2.52293e-19	LY96
KBTBD4	1.62581e-23	-2.65329	1	1	2.58162e-19	KBTBD4
ALG9	1.66227e-23	-3.3271	1	1	2.63951e-19	ALG9
RWDD1	1.84664e-23	1.94533	1	1	2.93227e-19	RWDD1
AC005592.2	1.87302e-23	-2.24241	0.897	0.25	2.97418e-19	AC005592.2
SC5D	1.91004e-23	-2.98986	1	1	3.03295e-19	SC5D
STAM2	1.95228e-23	-2.85845	1	1	3.10002e-19	STAM2
TRABD	2.32624e-23	0.0846667	1	1	3.69383e-19	TRABD
SLC22A18	2.93494e-23	-0.638863	1	1	4.6604e-19	SLC22A18
ZDHHC24	2.97458e-23	-0.0968425	1	1	4.72334e-19	ZDHHC24
ZNF346	3.50283e-23	-2.90747	1	1	5.56214e-19	ZNF346
AC005477.1	3.66558e-23	-1.70339	0.448	0	5.82057e-19	AC005477.1
IMPDH1	4.12485e-23	0.204751	1	1	6.54985e-19	IMPDH1
RBM5	4.21916e-23	-2.74549	1	1	6.69961e-19	RBM5
UBXN7	4.39047e-23	-2.53266	1	1	6.97163e-19	UBXN7
SNRPG	4.59293e-23	2.50338	1	1	7.29312e-19	SNRPG
RAD23B	4.89355e-23	0.922141	1	1	7.77047e-19	RAD23B
SPIDR	5.18531e-23	-2.88993	1	1	8.23375e-19	SPIDR
TCEAL4	5.19885e-23	1.17051	1	1	8.25526e-19	TCEAL4
IKBIP	5.20775e-23	0.872581	1	1	8.26939e-19	IKBIP
MORC2-AS1	5.32687e-23	-3.91625	1	1	8.45854e-19	MORC2-AS1
CENPB	5.6601e-23	0.335717	1	1	8.98766e-19	CENPB
FAM133B	5.90943e-23	0.829214	1	1	9.38358e-19	FAM133B
SF3B5	6.93783e-23	1.45235	1	1	1.10166e-18	SF3B5
GAPDH	7.11992e-23	2.05503	1	1	1.13057e-18	GAPDH
TRAPPC1	7.12813e-23	1.58832	1	1	1.13188e-18	TRAPPC1
RGPD5	8.68523e-23	-5.34659	0.793	1	1.37913e-18	RGPD5
LRP2BP	8.70157e-23	-3.37228	1	1	1.38172e-18	LRP2BP
WDR75	8.70335e-23	-2.58345	1	1	1.38201e-18	WDR75
CBR3	9.01415e-23	0.419661	1	1	1.43136e-18	CBR3
DDX20	9.21352e-23	-2.92515	1	1	1.46301e-18	DDX20
RBM12	9.60661e-23	-3.3427	1	1	1.52543e-18	RBM12
BRI3BP	9.85353e-23	0.262674	1	1	1.56464e-18	BRI3BP
RCBTB2	1.06595e-22	-4.06699	0.966	1	1.69262e-18	RCBTB2
NDUFAF2	1.06761e-22	1.5176	1	1	1.69525e-18	NDUFAF2
ZFP1	1.19468e-22	-3.14702	1	1	1.89703e-18	ZFP1
MED31	1.25998e-22	0.763019	1	1	2.00073e-18	MED31
TOB1	1.28034e-22	-3.95835	1	1	2.03305e-18	TOB1
CCDC167	1.30538e-22	1.56334	1	1	2.07281e-18	CCDC167
SSBP4	1.31218e-22	1.02835	1	1	2.08362e-18	SSBP4
RPL36A	1.31494e-22	2.73179	1	1	2.08799e-18	RPL36A
KCTD7	1.32425e-22	-3.29336	1	1	2.10278e-18	KCTD7
NCOA2	1.32934e-22	-3.92927	1	1	2.11087e-18	NCOA2
SUOX	1.49553e-22	-3.13716	1	1	2.37476e-18	SUOX
PKN1	1.6058e-22	0.341758	1	1	2.54985e-18	PKN1
INTS9	1.81137e-22	-3.00927	1	1	2.87628e-18	INTS9
SP4	1.8456e-22	-3.80351	1	1	2.93062e-18	SP4
SAP130	1.85179e-22	-3.19761	1	1	2.94046e-18	SAP130
RILPL2	1.86552e-22	-0.0711986	1	1	2.96226e-18	RILPL2
METTL5	1.95139e-22	1.42879	1	1	3.09861e-18	METTL5
HSPH1	2.00706e-22	-3.75977	1	1	3.18701e-18	HSPH1
BBS9	2.01245e-22	-3.33794	1	1	3.19556e-18	BBS9
PROSER1	2.06784e-22	-2.93683	1	1	3.28352e-18	PROSER1
ANGEL1	2.13077e-22	-3.8594	1	1	3.38345e-18	ANGEL1
PAFAH1B2	2.23848e-22	-2.56062	1	1	3.55448e-18	PAFAH1B2
ZNF317	2.2456e-22	-2.93845	1	1	3.56578e-18	ZNF317
PHF5A	2.39469e-22	0.73149	1	1	3.80253e-18	PHF5A
LSM8	2.58352e-22	1.44059	1	1	4.10236e-18	LSM8
GSC	2.59249e-22	-1.02903	1	0.5	4.11661e-18	GSC
VKORC1	2.67777e-22	1.26181	1	1	4.25204e-18	VKORC1
MRPS15	2.69024e-22	1.63096	1	1	4.27183e-18	MRPS15
ANKRD11	2.75113e-22	0.628482	1	1	4.36852e-18	ANKRD11
SOD1	2.81002e-22	2.13263	1	1	4.46202e-18	SOD1
YY1AP1	2.96463e-22	-2.72614	1	1	4.70754e-18	YY1AP1
CEP170	3.05322e-22	-2.83477	1	1	4.8482e-18	CEP170
ABI1	3.11151e-22	-3.56152	1	1	4.94076e-18	ABI1
C6orf226	3.65827e-22	0.226108	1	1	5.80896e-18	C6orf226
SLC25A44	3.8887e-22	-2.75637	1	1	6.17486e-18	SLC25A44
LINC01173	3.88895e-22	-2.42084	0.379	0	6.17526e-18	LINC01173
SREK1IP1	3.89451e-22	0.770483	1	1	6.1841e-18	SREK1IP1
RRBP1	3.90315e-22	1.25015	1	1	6.19782e-18	RRBP1
SNRPD2	3.97429e-22	1.94761	1	1	6.31077e-18	SNRPD2
MON2	4.03798e-22	-3.34225	1	1	6.4119e-18	MON2
ERCC3	4.11477e-22	-2.78957	1	1	6.53384e-18	ERCC3
RNPEPL1	4.13833e-22	0.0960309	1	1	6.57126e-18	RNPEPL1
NKTR	4.19741e-22	-2.2662	1	1	6.66507e-18	NKTR
NUP153	4.28139e-22	-3.37075	1	1	6.79843e-18	NUP153
RYK	4.45218e-22	-0.0423208	1	1	7.06962e-18	RYK
CUTA	4.47712e-22	1.87915	1	1	7.10922e-18	CUTA
SNF8	4.48523e-22	1.43571	1	1	7.12209e-18	SNF8
HOXC9	4.63038e-22	-0.467339	0.828	0.25	7.35258e-18	HOXC9
FAM200B	6.07269e-22	1.56917	1	1	9.64283e-18	FAM200B
USP10	6.20971e-22	-2.43575	1	1	9.86041e-18	USP10
CLTA	6.36875e-22	2.00671	1	1	1.01129e-17	CLTA
MT1X	6.72017e-22	1.86505	1	1	1.0671e-17	MT1X
TTLL5	6.77088e-22	-3.40301	1	1	1.07515e-17	TTLL5
NDUFB4	7.93055e-22	2.68308	1	1	1.25929e-17	NDUFB4
DNTTIP2	8.20098e-22	-3.01753	1	1	1.30223e-17	DNTTIP2
PIGBOS1	8.36133e-22	0.0663941	1	1	1.3277e-17	PIGBOS1
HERC1	8.44702e-22	-2.81417	1	1	1.3413e-17	HERC1
GATAD2B	8.52901e-22	-3.06513	1	1	1.35432e-17	GATAD2B
TBCK	8.88319e-22	-3.52061	1	1	1.41056e-17	TBCK
B3GNT9	9.05794e-22	-0.708276	1	0.75	1.43831e-17	B3GNT9
OAZ1	9.20469e-22	2.15274	1	1	1.46161e-17	OAZ1
THAP7	9.22079e-22	0.385365	1	1	1.46417e-17	THAP7
VIM	9.49724e-22	2.86614	1	1	1.50807e-17	VIM
CRY2	9.77206e-22	-3.3341	1	1	1.5517e-17	CRY2
NBPF15	9.78512e-22	-3.34015	1	1	1.55378e-17	NBPF15
REEP4	1.00217e-21	0.0585879	1	1	1.59135e-17	REEP4
MEX3D	1.08568e-21	-0.75054	1	1	1.72396e-17	MEX3D
TMEM33	1.18077e-21	-2.86274	1	1	1.87494e-17	TMEM33
USP22	1.20021e-21	-2.76023	1	1	1.90581e-17	USP22
CNIH3	1.2884e-21	0.737038	1	1	2.04585e-17	CNIH3
TAF11	1.2936e-21	0.472638	1	1	2.0541e-17	TAF11
MRPL41	1.31746e-21	2.56419	1	1	2.09199e-17	MRPL41
TLCD2	1.34087e-21	-1.68651	1	1	2.12917e-17	TLCD2
TIMP1	1.34381e-21	3.49624	1	1	2.13384e-17	TIMP1
MCTS1	1.36174e-21	1.28453	1	1	2.1623e-17	MCTS1
KIAA0895L	1.40393e-21	-3.5128	1	1	2.22931e-17	KIAA0895L
NUCKS1	1.42224e-21	1.3412	1	1	2.25837e-17	NUCKS1
DDX6	1.441e-21	-3.96243	1	1	2.28816e-17	DDX6
HOXC8	1.62103e-21	-1.12228	0.793	0	2.57403e-17	HOXC8
PRDX5	1.62652e-21	1.71012	1	1	2.58274e-17	PRDX5
FAM171B	1.67872e-21	-5.5965	1	1	2.66565e-17	FAM171B
ASB3	1.70364e-21	-3.36064	1	1	2.70521e-17	ASB3
RBM48	1.8863e-21	-3.17166	1	1	2.99525e-17	RBM48
TRIM35	2.0198e-21	-3.46206	1	1	3.20723e-17	TRIM35
ATAD2B	2.12057e-21	-3.21951	1	1	3.36725e-17	ATAD2B
SLC38A9	2.36159e-21	-2.69367	1	1	3.74997e-17	SLC38A9
CTC1	2.48956e-21	-3.90962	1	1	3.95317e-17	CTC1
RNF4	2.78107e-21	-2.45161	1	1	4.41607e-17	RNF4
RAC3	2.93819e-21	1.43997	1	1	4.66556e-17	RAC3
ANAPC16	2.98057e-21	1.5015	1	1	4.73284e-17	ANAPC16
GDAP2	2.99672e-21	-2.76485	1	1	4.75849e-17	GDAP2
MORC3	3.21715e-21	-2.65476	1	1	5.10852e-17	MORC3
TP53BP2	3.2587e-21	-3.15374	1	1	5.17448e-17	TP53BP2
IMP3	3.25905e-21	0.474803	1	1	5.17505e-17	IMP3
SLC19A2	3.34564e-21	-3.69755	0.966	1	5.31254e-17	SLC19A2
ZNF524	3.54948e-21	-0.20146	1	1	5.63622e-17	ZNF524
HOXC6	3.71924e-21	-0.971243	0.793	0.25	5.90577e-17	HOXC6
FOS	3.95153e-21	-6.59461	1	1	6.27463e-17	FOS
UBE3C	4.061e-21	0.0423673	1	1	6.44847e-17	UBE3C
ATXN7L2	4.17166e-21	-3.87096	1	1	6.62417e-17	ATXN7L2
MDM4	4.3119e-21	-2.94087	1	1	6.84686e-17	MDM4
NFYA	4.65072e-21	-3.76286	1	1	7.38488e-17	NFYA
POLI	4.65887e-21	-2.75529	1	1	7.39782e-17	POLI
ITGB3BP	4.74907e-21	1.03865	1	1	7.54104e-17	ITGB3BP
YY1	4.95028e-21	0.343709	1	1	7.86054e-17	YY1
APOL6	5.46554e-21	-0.83512	1	1	8.67872e-17	APOL6
NDUFA8	5.49199e-21	1.49737	1	1	8.72072e-17	NDUFA8
PRR7	5.65161e-21	1.04414	1	1	8.97419e-17	PRR7
EIF2S2	5.94999e-21	2.04848	1	1	9.44798e-17	EIF2S2
ZFC3H1	6.04613e-21	-2.83833	1	1	9.60064e-17	ZFC3H1
VIM-AS1	6.08412e-21	-1.33944	1	1	9.66097e-17	VIM-AS1
TMEM160	6.16898e-21	1.95895	1	1	9.79572e-17	TMEM160
CEP97	6.18163e-21	-3.11674	1	1	9.81581e-17	CEP97
STK16	6.41283e-21	0.42953	1	1	1.01829e-16	STK16
POLR3C	6.62342e-21	-3.3144	1	1	1.05173e-16	POLR3C
ANKRD44	6.78907e-21	-3.6652	1	1	1.07804e-16	ANKRD44
CSRNP2	6.79955e-21	-3.64691	1	1	1.0797e-16	CSRNP2
TTC31	7.5529e-21	-2.85749	1	1	1.19932e-16	TTC31
HOXB13	7.67838e-21	-2.46259	0.379	0	1.21925e-16	HOXB13
LRRC49	8.08782e-21	-2.98692	1	1	1.28426e-16	LRRC49
ASB7	8.68794e-21	-2.65471	1	1	1.37956e-16	ASB7
SUPV3L1	8.80668e-21	-2.96045	1	1	1.39841e-16	SUPV3L1
METRN	8.87705e-21	3.71394	1	1	1.40959e-16	METRN
HCFC2	8.88403e-21	-2.78538	1	1	1.4107e-16	HCFC2
C1orf35	9.04973e-21	0.358788	1	1	1.43701e-16	C1orf35
MRPL4	1.0583e-20	0.869633	1	1	1.68048e-16	MRPL4
CELSR3	1.11534e-20	-4.74108	1	1	1.77104e-16	CELSR3
PGGT1B	1.15169e-20	-3.42776	1	1	1.82876e-16	PGGT1B
RELL2	1.17109e-20	-1.16057	1	1	1.85957e-16	RELL2
ZNF574	1.28708e-20	-3.60868	1	1	2.04375e-16	ZNF574
CACNB1	1.30418e-20	-3.92687	1	1	2.0709e-16	CACNB1
MEOX2	1.3293e-20	0.0117738	0.862	0.5	2.1108e-16	MEOX2
ZCCHC8	1.34278e-20	-2.56427	1	1	2.1322e-16	ZCCHC8
BACE1-AS	1.34418e-20	-3.56631	1	1	2.13442e-16	BACE1-AS
RAD54L2	1.43574e-20	-2.93408	1	1	2.27981e-16	RAD54L2
TRIM52	1.48601e-20	-3.02127	1	1	2.35963e-16	TRIM52
PDZD8	1.69282e-20	-3.68483	1	1	2.68803e-16	PDZD8
CTNND1	1.7985e-20	-3.2014	1	1	2.85584e-16	CTNND1
ZNF462	1.80901e-20	-3.88704	1	1	2.87252e-16	ZNF462
S100A2	1.91304e-20	0.598944	1	1	3.03771e-16	S100A2
SCHIP1	1.94459e-20	-4.13457	1	1	3.08781e-16	SCHIP1
KLF7	1.9878e-20	-4.33409	1	1	3.15643e-16	KLF7
AP2S1	2.02219e-20	2.18576	1	1	3.21104e-16	AP2S1
MSX1	2.03214e-20	0.0305055	1	1	3.22683e-16	MSX1
OGFOD3	2.1665e-20	-0.037031	1	1	3.44019e-16	OGFOD3
SENP7	2.20615e-20	-3.08815	1	1	3.50315e-16	SENP7
MSRB2	2.25229e-20	0.660602	1	1	3.57642e-16	MSRB2
ZNF512	2.49636e-20	-3.07909	1	1	3.96397e-16	ZNF512
CWC22	2.5414e-20	-2.5344	1	1	4.03549e-16	CWC22
TIPARP-AS1	2.75421e-20	-1.94705	0.966	0.75	4.3734e-16	TIPARP-AS1
USF2	2.82994e-20	0.772285	1	1	4.49366e-16	USF2
RPP25L	2.90118e-20	0.337216	1	1	4.60678e-16	RPP25L
CKAP4	2.92139e-20	1.45854	1	1	4.63888e-16	CKAP4
FBXO30	3.09245e-20	-3.06471	1	1	4.9105e-16	FBXO30
BHLHB9	3.13616e-20	-3.56544	0.966	1	4.97991e-16	BHLHB9
AP1G1	3.19452e-20	-2.58062	1	1	5.07258e-16	AP1G1
RICTOR	3.26224e-20	-2.92656	1	1	5.18011e-16	RICTOR
APOM	3.69577e-20	-1.06131	1	1	5.86852e-16	APOM
LSM4	3.75943e-20	2.00959	1	1	5.9696e-16	LSM4
PABPC4	3.9443e-20	0.76984	1	1	6.26316e-16	PABPC4
MFSD3	4.07344e-20	0.219241	1	1	6.46821e-16	MFSD3
CCM2	4.43664e-20	0.757221	1	1	7.04494e-16	CCM2
HSDL1	4.74667e-20	-3.19797	1	1	7.53723e-16	HSDL1
FAM207A	4.87467e-20	0.982598	1	1	7.74049e-16	FAM207A
ELOF1	5.17638e-20	0.908791	1	1	8.21958e-16	ELOF1
MPC2	5.63401e-20	1.38451	1	1	8.94624e-16	MPC2
KIF3A	5.71287e-20	-2.6462	1	1	9.07147e-16	KIF3A
CDS2	6.39457e-20	-2.60669	1	1	1.01539e-15	CDS2
PRKAB1	6.63911e-20	-2.77215	1	1	1.05422e-15	PRKAB1
HOXC4	7.08361e-20	-1.1257	0.966	0.5	1.12481e-15	HOXC4
JOSD2	7.23043e-20	1.08431	1	1	1.14812e-15	JOSD2
NT5C2	7.24671e-20	-3.47738	1	1	1.15071e-15	NT5C2
KIAA1841	7.4378e-20	-2.63715	1	1	1.18105e-15	KIAA1841
MFAP3	7.51028e-20	-3.52573	0.931	1	1.19256e-15	MFAP3
GSTO1	7.58592e-20	1.50353	1	1	1.20457e-15	GSTO1
ANKRD36B	8.43246e-20	-4.05346	1	1	1.33899e-15	ANKRD36B
CNPY2	8.57975e-20	1.02162	1	1	1.36238e-15	CNPY2
RNF38	1.01635e-19	-3.40431	1	1	1.61386e-15	RNF38
RHOC	1.02193e-19	2.1282	1	1	1.62273e-15	RHOC
NBPF12	1.06311e-19	-3.27745	1	1	1.68811e-15	NBPF12
TRA2A	1.07847e-19	-4.60181	1	1	1.7125e-15	TRA2A
URB1-AS1	1.07864e-19	-0.0637651	1	1	1.71276e-15	URB1-AS1
THUMPD1	1.12849e-19	-2.62689	1	1	1.79192e-15	THUMPD1
USP49	1.14655e-19	-3.1886	1	1	1.8206e-15	USP49
FBXO38	1.15167e-19	-3.1177	1	1	1.82873e-15	FBXO38
MED23	1.19208e-19	-3.18285	1	1	1.8929e-15	MED23
TNFAIP1	1.24708e-19	-2.68311	1	1	1.98024e-15	TNFAIP1
ZSCAN30	1.29935e-19	-3.00103	1	1	2.06324e-15	ZSCAN30
S100A10	1.31498e-19	5.05056	0.966	1	2.08805e-15	S100A10
FUBP1	1.31946e-19	-2.83992	1	1	2.09517e-15	FUBP1
CENPA	1.37342e-19	1.22629	1	1	2.18086e-15	CENPA
RRN3	1.38746e-19	-2.94356	1	1	2.20314e-15	RRN3
EIF3G	1.46768e-19	1.24778	1	1	2.33053e-15	EIF3G
ALKBH7	1.50823e-19	1.34401	1	1	2.39492e-15	ALKBH7
MRGBP	1.6305e-19	0.566798	1	1	2.58907e-15	MRGBP
DCTN5	1.74182e-19	-2.33672	1	1	2.76584e-15	DCTN5
CISD1	1.75261e-19	1.38736	1	1	2.78297e-15	CISD1
ZNF775	1.82236e-19	-0.514043	1	1	2.89372e-15	ZNF775
SLC35F5	1.8266e-19	-2.6212	1	1	2.90046e-15	SLC35F5
CCDC25	1.96262e-19	0.823826	1	1	3.11644e-15	CCDC25
GNAI2	2.17055e-19	1.14082	1	1	3.44662e-15	GNAI2
COPA	2.25178e-19	-3.02209	1	1	3.57561e-15	COPA
EIF5AL1	2.3782e-19	-1.21544	1	1	3.77635e-15	EIF5AL1
FJX1	2.66462e-19	0.927693	1	1	4.23114e-15	FJX1
COX7A2L	2.84235e-19	1.11822	1	1	4.51337e-15	COX7A2L
CTNNBIP1	2.98023e-19	1.32655	1	1	4.73231e-15	CTNNBIP1
LMBR1L	3.00406e-19	-3.24932	1	1	4.77015e-15	LMBR1L
RANBP1	3.00721e-19	2.13044	1	1	4.77515e-15	RANBP1
SNRPD1	3.49884e-19	2.15696	1	1	5.55581e-15	SNRPD1
MAPRE2	3.54039e-19	-3.72089	1	1	5.62179e-15	MAPRE2
TBC1D24	3.78109e-19	-3.12635	1	1	6.004e-15	TBC1D24
PHPT1	3.8233e-19	2.45089	1	1	6.07102e-15	PHPT1
FBXL5	4.0201e-19	-2.52121	1	1	6.38351e-15	FBXL5
HSF2	4.07595e-19	-3.01524	1	1	6.4722e-15	HSF2
ROMO1	4.09866e-19	2.51885	1	1	6.50826e-15	ROMO1
COPRS	4.57251e-19	1.8987	1	1	7.26068e-15	COPRS
REPIN1	4.66522e-19	0.806015	1	1	7.40791e-15	REPIN1
FAM161B	5.03503e-19	-3.22591	0.966	1	7.99513e-15	FAM161B
RBBP4	5.07296e-19	-2.39367	1	1	8.05536e-15	RBBP4
POLR2K	5.08843e-19	0.904612	1	1	8.07991e-15	POLR2K
CALCOCO1	5.11414e-19	-4.41798	1	1	8.12075e-15	CALCOCO1
TMEM208	5.25216e-19	0.76575	1	1	8.3399e-15	TMEM208
PEBP1	5.50841e-19	1.66984	1	1	8.7468e-15	PEBP1
GAR1	5.79819e-19	0.525814	1	1	9.20694e-15	GAR1
ZNF614	5.97733e-19	-3.08166	1	1	9.49139e-15	ZNF614
MCUR1	6.28423e-19	1.21571	1	1	9.97873e-15	MCUR1
NUP160	6.28945e-19	-2.50114	1	1	9.98701e-15	NUP160
KBTBD6	6.7702e-19	-3.25467	1	1	1.07504e-14	KBTBD6
ACOT13	6.84259e-19	0.698877	1	1	1.08654e-14	ACOT13
S100A4	7.10485e-19	0.483546	1	1	1.12818e-14	S100A4
TIMP2	7.14593e-19	1.71244	1	1	1.1347e-14	TIMP2
PA2G4	7.15525e-19	0.964027	1	1	1.13618e-14	PA2G4
HDAC6	7.39237e-19	-2.99276	1	1	1.17383e-14	HDAC6
ZNF211	7.51333e-19	-3.69538	1	1	1.19304e-14	ZNF211
LINC01184	7.51991e-19	0.491648	1	1	1.19409e-14	LINC01184
DHX35	8.55834e-19	-3.18498	1	1	1.35898e-14	DHX35
RGS14	8.59587e-19	-0.854392	1	0.75	1.36494e-14	RGS14
GSTP1	8.62082e-19	1.52122	1	1	1.3689e-14	GSTP1
PARK7	8.92004e-19	1.53891	1	1	1.41641e-14	PARK7
ZSWIM7	9.76996e-19	1.15657	1	1	1.55137e-14	ZSWIM7
ADCK2	9.93951e-19	-0.400354	1	1	1.5783e-14	ADCK2
MRPL43	1.07782e-18	0.732468	1	1	1.71147e-14	MRPL43
ZNF598	1.0911e-18	-0.319188	1	1	1.73256e-14	ZNF598
AVEN	1.10774e-18	-0.676672	1	1	1.75898e-14	AVEN
TP53I13	1.19032e-18	0.511428	1	1	1.89011e-14	TP53I13
ZBTB26	1.22908e-18	-3.69171	0.966	1	1.95165e-14	ZBTB26
VPS52	1.23529e-18	-2.81508	1	1	1.96152e-14	VPS52
INO80E	1.2383e-18	0.523239	1	1	1.96629e-14	INO80E
ERCC6L2	1.28123e-18	-3.16645	1	1	2.03446e-14	ERCC6L2
C4orf48	1.29302e-18	2.86457	1	1	2.05318e-14	C4orf48
NBPF11	1.34746e-18	-2.96016	1	1	2.13963e-14	NBPF11
CDKN2AIPNL	1.55782e-18	0.760728	1	1	2.47366e-14	CDKN2AIPNL
ZNF143	1.57015e-18	-2.53668	1	1	2.49324e-14	ZNF143
FAM76B	1.60804e-18	-3.19967	1	1	2.5534e-14	FAM76B
LMO4	1.62953e-18	2.53287	1	1	2.58754e-14	LMO4
C2CD3	1.6774e-18	-2.90014	1	1	2.66355e-14	C2CD3
LIMK1	1.69838e-18	0.607978	1	1	2.69686e-14	LIMK1
CLEC16A	1.714e-18	-3.34313	1	1	2.72166e-14	CLEC16A
BRAP	1.73595e-18	-2.64058	1	1	2.75652e-14	BRAP
SPIN3	1.74416e-18	-3.38696	1	1	2.76955e-14	SPIN3
TBCC	1.74901e-18	-2.9177	1	1	2.77726e-14	TBCC
NT5C	1.91411e-18	0.734594	1	1	3.03942e-14	NT5C
ZNF771	2.03796e-18	0.140124	1	1	3.23608e-14	ZNF771
BCL9	2.09257e-18	-3.845	1	1	3.32279e-14	BCL9
NEDD8	2.22084e-18	1.96086	1	1	3.52647e-14	NEDD8
EIF1	2.26119e-18	1.02837	1	1	3.59054e-14	EIF1
PSME2	2.26984e-18	1.8623	1	1	3.60429e-14	PSME2
TRAPPC11	2.30301e-18	-2.81302	1	1	3.65694e-14	TRAPPC11
TPRN	2.49173e-18	-1.457	1	1	3.95661e-14	TPRN
PDCD5	2.5279e-18	2.08562	1	1	4.01405e-14	PDCD5
PPP1R35	2.76793e-18	1.0562	1	1	4.39519e-14	PPP1R35
CLCN6	2.80236e-18	-3.21254	1	1	4.44987e-14	CLCN6
UBE2S	2.86529e-18	2.42144	1	1	4.54979e-14	UBE2S
ZNF586	2.97025e-18	-3.28665	1	1	4.71646e-14	ZNF586
RNF111	2.97459e-18	-2.94815	1	1	4.72336e-14	RNF111
TSPYL1	3.25447e-18	-4.01695	1	1	5.16777e-14	TSPYL1
KIAA2013	3.3219e-18	0.00783441	1	1	5.27484e-14	KIAA2013
PSENEN	3.41251e-18	0.463869	1	1	5.41873e-14	PSENEN
MRPL55	3.49624e-18	0.829021	1	1	5.55167e-14	MRPL55
BBS4	3.62808e-18	-3.10939	1	1	5.76102e-14	BBS4
HSPB11	3.67126e-18	1.52958	1	1	5.82959e-14	HSPB11
POMT1	4.10779e-18	-2.90291	1	1	6.52275e-14	POMT1
ADD1	4.26029e-18	-2.98873	1	1	6.76491e-14	ADD1
PDIK1L	4.97585e-18	-3.32683	1	1	7.90116e-14	PDIK1L
MCPH1	5.03799e-18	-2.5489	1	1	7.99982e-14	MCPH1
ZFR	5.04364e-18	-1.97553	1	1	8.0088e-14	ZFR
PPIA	5.1218e-18	2.14408	1	1	8.13291e-14	PPIA
TMEM129	5.33793e-18	0.250261	1	1	8.47609e-14	TMEM129
TMTC3	5.74015e-18	-3.11855	1	1	9.11479e-14	TMTC3
STAM	5.74478e-18	-2.89005	1	1	9.12213e-14	STAM
AGO3	5.91194e-18	-2.8019	1	1	9.38757e-14	AGO3
ZNF160	5.94212e-18	-2.7073	1	1	9.43549e-14	ZNF160
FSD1L	6.63037e-18	-3.02146	1	1	1.05284e-13	FSD1L
ETV4	6.7467e-18	1.02228	1	1	1.07131e-13	ETV4
DCUN1D1	6.75321e-18	-3.01121	1	1	1.07234e-13	DCUN1D1
KDM3A	6.83798e-18	-3.11886	1	1	1.0858e-13	KDM3A
TMEM14C	7.13437e-18	1.73328	1	1	1.13287e-13	TMEM14C
SDHC	7.23696e-18	0.664898	1	1	1.14916e-13	SDHC
DUT	7.35001e-18	1.56369	1	1	1.16711e-13	DUT
GPS2	7.48611e-18	-2.79419	1	1	1.18872e-13	GPS2
SNHG7	7.55418e-18	1.77781	1	1	1.19953e-13	SNHG7
KLF16	7.59887e-18	-0.938807	1	1	1.20662e-13	KLF16
E2F1	7.64254e-18	0.628096	1	1	1.21356e-13	E2F1
GDAP1	7.90348e-18	-3.61947	1	1	1.25499e-13	GDAP1
MED17	8.05438e-18	-2.45025	1	1	1.27896e-13	MED17
SEPSECS	8.15648e-18	-2.91077	1	1	1.29517e-13	SEPSECS
PFN1	8.16112e-18	2.26741	1	1	1.2959e-13	PFN1
NTAN1	8.21339e-18	0.845815	1	1	1.3042e-13	NTAN1
BORCS8	8.52141e-18	0.134041	1	1	1.35311e-13	BORCS8
RGS19	8.53552e-18	0.134722	1	1	1.35535e-13	RGS19
PHF3	8.55418e-18	-2.49745	1	1	1.35832e-13	PHF3
CCNJ	8.57209e-18	-3.20242	1	1	1.36116e-13	CCNJ
TSPO	8.64861e-18	1.97206	1	1	1.37331e-13	TSPO
ZFYVE26	9.17691e-18	-4.16215	1	1	1.4572e-13	ZFYVE26
ALYREF	9.29015e-18	0.894947	1	1	1.47518e-13	ALYREF
RAD23A	9.80482e-18	1.41349	1	1	1.55691e-13	RAD23A
CRKL	1.00713e-17	-3.37609	1	1	1.59922e-13	CRKL
ZNF184	1.03236e-17	-2.96855	1	1	1.63929e-13	ZNF184
TRERF1	1.1098e-17	-4.2545	1	1	1.76225e-13	TRERF1
B3GALNT2	1.11823e-17	-3.56088	1	1	1.77564e-13	B3GALNT2
ZMAT2	1.12584e-17	0.427998	1	1	1.78772e-13	ZMAT2
CHMP4A	1.14323e-17	0.614851	1	1	1.81534e-13	CHMP4A
FBXO42	1.19601e-17	-3.09257	1	1	1.89915e-13	FBXO42
PDLIM2	1.19997e-17	1.67056	1	1	1.90544e-13	PDLIM2
SRM	1.25455e-17	2.14967	1	1	1.9921e-13	SRM
AEBP2	1.27152e-17	-3.83697	1	1	2.01904e-13	AEBP2
POLR2H	1.45252e-17	0.964288	1	1	2.30646e-13	POLR2H
EIF4EBP1	1.4831e-17	1.96077	1	1	2.35501e-13	EIF4EBP1
PDCD2	1.48878e-17	0.891031	1	1	2.36403e-13	PDCD2
NDUFS4	1.50068e-17	1.23379	1	1	2.38293e-13	NDUFS4
LUC7L	1.50924e-17	-2.22515	1	1	2.39652e-13	LUC7L
GPR89A	1.52989e-17	-2.9157	1	1	2.42931e-13	GPR89A
ZNF641	1.58858e-17	-3.19875	1	1	2.5225e-13	ZNF641
EXOC6B	1.61476e-17	-3.59008	1	1	2.56407e-13	EXOC6B
FAM234B	1.62073e-17	-3.80808	1	1	2.57356e-13	FAM234B
ERCC5	1.62083e-17	-2.89852	1	1	2.57372e-13	ERCC5
MRPS7	1.73447e-17	0.815594	1	1	2.75416e-13	MRPS7
TET3	1.75554e-17	-4.50623	1	1	2.78763e-13	TET3
ZNF532	1.91087e-17	-3.15906	1	1	3.03427e-13	ZNF532
SETD2	1.95637e-17	-2.33911	1	1	3.10652e-13	SETD2
ZSCAN26	1.97412e-17	-3.31778	1	1	3.1347e-13	ZSCAN26
LANCL1	2.08866e-17	-2.93417	1	1	3.31658e-13	LANCL1
CIB1	2.19494e-17	1.28774	1	1	3.48534e-13	CIB1
DDX46	2.24221e-17	0.811656	1	1	3.5604e-13	DDX46
SLIRP	2.27684e-17	2.71431	1	1	3.6154e-13	SLIRP
DCAF8	2.40528e-17	-2.76992	1	1	3.81935e-13	DCAF8
KMT2E-AS1	2.47936e-17	-0.755495	1	1	3.93698e-13	KMT2E-AS1
LARP7	2.6141e-17	0.362391	1	1	4.15093e-13	LARP7
SDF2L1	2.65475e-17	1.00302	1	1	4.21548e-13	SDF2L1
POLR1D	2.66636e-17	1.30024	1	1	4.23392e-13	POLR1D
HHLA3	2.71397e-17	-0.353648	1	1	4.30951e-13	HHLA3
FUT10	2.7549e-17	-2.88181	1	1	4.3745e-13	FUT10
FAM120A	2.76573e-17	0.691738	1	1	4.3917e-13	FAM120A
DCUN1D4	2.83826e-17	-2.65498	1	1	4.50687e-13	DCUN1D4
SNHG8	3.00256e-17	1.60032	1	1	4.76776e-13	SNHG8
CKLF	3.31735e-17	1.85794	1	1	5.26762e-13	CKLF
POLR3B	3.33716e-17	-3.08613	1	1	5.29908e-13	POLR3B
PPDPF	3.39765e-17	2.92286	1	1	5.39513e-13	PPDPF
CCNL1	3.43055e-17	-2.67455	1	1	5.44737e-13	CCNL1
TXLNA	3.5265e-17	-2.7419	1	1	5.59973e-13	TXLNA
MRPL22	3.59678e-17	1.07091	1	1	5.71133e-13	MRPL22
ZNF182	3.66438e-17	-2.86894	1	1	5.81868e-13	ZNF182
HEATR6	3.66636e-17	-2.91702	1	1	5.82181e-13	HEATR6
RHOG	3.70613e-17	0.43573	1	1	5.88496e-13	RHOG
POLH	3.76642e-17	-2.88084	1	1	5.9807e-13	POLH
CLPTM1L	3.76886e-17	1.03876	1	1	5.98457e-13	CLPTM1L
CIB2	4.13304e-17	-0.133462	1	1	6.56286e-13	CIB2
ACVR2A	4.13982e-17	-3.90974	1	1	6.57361e-13	ACVR2A
RHOA	4.18505e-17	0.500458	1	1	6.64545e-13	RHOA
KDELR1	4.29765e-17	1.12401	1	1	6.82424e-13	KDELR1
TBL1XR1	4.34237e-17	-2.78335	1	1	6.89524e-13	TBL1XR1
RABL6	4.8298e-17	0.651304	1	1	7.66924e-13	RABL6
CRBN	4.92648e-17	-2.38021	1	1	7.82275e-13	CRBN
C15orf40	5.06466e-17	0.178043	1	1	8.04217e-13	C15orf40
ZC2HC1A	5.07593e-17	-3.23952	1	1	8.06007e-13	ZC2HC1A
UBE2R2	5.22068e-17	0.937939	1	1	8.28992e-13	UBE2R2
ZNRD1	5.24806e-17	0.0474607	1	1	8.3334e-13	ZNRD1
USP47	5.25573e-17	-2.07772	1	1	8.34558e-13	USP47
MRPS6	5.38084e-17	2.81574	1	1	8.54424e-13	MRPS6
HOXA10-AS	5.59324e-17	-1.20891	0.345	0	8.8815e-13	HOXA10-AS
NDUFC2	5.64029e-17	1.81086	1	1	8.95622e-13	NDUFC2
NES	5.99534e-17	2.29519	1	1	9.52e-13	NES
SMAD4	6.26619e-17	-2.43148	1	1	9.95008e-13	SMAD4
PPP6R3	6.38428e-17	-2.46577	1	1	1.01376e-12	PPP6R3
UBA3	6.40222e-17	-2.48687	1	1	1.01661e-12	UBA3
DYRK4	6.81736e-17	0.281689	1	1	1.08253e-12	DYRK4
TMEM134	7.39309e-17	0.760523	1	1	1.17395e-12	TMEM134
MMAB	7.48314e-17	0.801881	1	1	1.18825e-12	MMAB
ELP4	7.59926e-17	-2.97252	1	1	1.20669e-12	ELP4
OGFR	7.62396e-17	-0.0173524	1	1	1.21061e-12	OGFR
SDF4	7.70218e-17	1.01952	1	1	1.22303e-12	SDF4
JUND	7.93287e-17	0.98231	1	1	1.25966e-12	JUND
SIVA1	7.94376e-17	1.99551	1	1	1.26139e-12	SIVA1
VPS53	7.95418e-17	-2.65096	1	1	1.26304e-12	VPS53
NMI	8.33887e-17	-0.340021	1	1	1.32413e-12	NMI
ZNF527	8.67174e-17	-3.14015	1	1	1.37698e-12	ZNF527
TSPAN4	8.70795e-17	0.352855	1	1	1.38274e-12	TSPAN4
HYPK	9.244e-17	-3.90686	0.966	1	1.46785e-12	HYPK
NR2F6	9.25372e-17	0.448328	1	1	1.4694e-12	NR2F6
MACROD1	9.4176e-17	0.107948	1	1	1.49542e-12	MACROD1
TP53TG1	9.49818e-17	0.902416	0.966	1	1.50822e-12	TP53TG1
MFSD14C	9.8376e-17	-3.63917	0.966	1	1.56211e-12	MFSD14C
ARF4-AS1	1.00559e-16	-1.70192	0.966	1	1.59678e-12	ARF4-AS1
UBIAD1	1.00735e-16	-2.71578	1	1	1.59957e-12	UBIAD1
INAFM1	1.01365e-16	1.03809	1	1	1.60957e-12	INAFM1
METAP2	1.0338e-16	0.981148	1	1	1.64158e-12	METAP2
APBB3	1.05239e-16	-3.42607	1	1	1.6711e-12	APBB3
RNF7	1.08518e-16	1.74672	1	1	1.72315e-12	RNF7
TRIM39	1.11211e-16	-2.93051	1	1	1.76592e-12	TRIM39
GATAD1	1.1874e-16	0.122562	1	1	1.88546e-12	GATAD1
NABP2	1.19221e-16	0.705165	1	1	1.89311e-12	NABP2
NUP98	1.22938e-16	-2.54786	1	1	1.95213e-12	NUP98
SACM1L	1.23032e-16	-2.19164	1	1	1.95362e-12	SACM1L
DBR1	1.2553e-16	-2.52151	1	1	1.99329e-12	DBR1
NHP2	1.28135e-16	1.81091	1	1	2.03465e-12	NHP2
GRK6	1.33845e-16	0.205533	1	1	2.12532e-12	GRK6
SOAT1	1.3642e-16	-2.76446	1	1	2.16622e-12	SOAT1
UBAP2L	1.50803e-16	-2.60579	1	1	2.39459e-12	UBAP2L
SIAH2	1.53354e-16	0.274798	1	1	2.43512e-12	SIAH2
ZBED3-AS1	1.5463e-16	-3.31942	1	1	2.45537e-12	ZBED3-AS1
SPATS2L	1.66083e-16	2.04681	1	1	2.63723e-12	SPATS2L
LRP4-AS1	1.77595e-16	-1.16773	1	0.5	2.82004e-12	LRP4-AS1
TFAP2A-AS1	1.80627e-16	-2.04788	0.793	0.25	2.86818e-12	TFAP2A-AS1
MAPKAPK2	1.81773e-16	0.110995	1	1	2.88637e-12	MAPKAPK2
PSMB2	1.86247e-16	1.06948	1	1	2.95742e-12	PSMB2
MTDH	1.91897e-16	1.30856	1	1	3.04713e-12	MTDH
KXD1	1.96686e-16	0.739093	1	1	3.12317e-12	KXD1
IL11	1.97317e-16	0.455065	0.897	0.5	3.1332e-12	IL11
CTTNBP2NL	2.13951e-16	-3.13729	1	1	3.39734e-12	CTTNBP2NL
NCBP1	2.15855e-16	-2.61916	1	1	3.42756e-12	NCBP1
SPTLC1	2.22507e-16	-3.33966	1	1	3.53319e-12	SPTLC1
CCDC107	2.26792e-16	0.701626	1	1	3.60123e-12	CCDC107
MAP7D3	2.31541e-16	0.370823	1	1	3.67664e-12	MAP7D3
EDRF1	2.34811e-16	-2.76721	1	1	3.72856e-12	EDRF1
LINC01116	2.45542e-16	-0.236562	1	1	3.89896e-12	LINC01116
RAPGEF6	2.73386e-16	-2.54948	1	1	4.3411e-12	RAPGEF6
PRDX1	2.85451e-16	1.74752	1	1	4.53268e-12	PRDX1
TUBGCP6	2.9044e-16	-3.62381	1	1	4.6119e-12	TUBGCP6
EZH1	3.07622e-16	-3.26641	1	1	4.88472e-12	EZH1
VDAC1	3.07751e-16	0.883145	1	1	4.88678e-12	VDAC1
ZNF627	3.08265e-16	-3.14156	1	1	4.89493e-12	ZNF627
EIF3J	3.13712e-16	1.5088	1	1	4.98143e-12	EIF3J
ZCCHC9	3.16189e-16	0.110997	1	1	5.02077e-12	ZCCHC9
COQ4	3.24262e-16	0.469307	1	1	5.14895e-12	COQ4
ZNF195	3.27545e-16	-2.62289	1	1	5.20109e-12	ZNF195
PHF21A	3.35683e-16	-3.15686	1	1	5.33032e-12	PHF21A
ANAPC4	3.42516e-16	-2.49776	1	1	5.43881e-12	ANAPC4
SCAMP1	3.43041e-16	-2.34304	1	1	5.44715e-12	SCAMP1
FBXL20	3.55939e-16	-3.35713	1	1	5.65195e-12	FBXL20
HECTD4	3.65803e-16	-2.71942	1	1	5.80858e-12	HECTD4
RAB3GAP1	3.69109e-16	-2.47094	1	1	5.86107e-12	RAB3GAP1
TRAPPC8	3.73236e-16	-2.82818	1	1	5.92662e-12	TRAPPC8
GNA11	3.87665e-16	-0.00413505	1	1	6.15574e-12	GNA11
ZMYM5	3.90376e-16	-2.81331	1	1	6.19878e-12	ZMYM5
ARMC10	3.95192e-16	0.881045	1	1	6.27525e-12	ARMC10
CENPC	3.97796e-16	-2.66996	1	1	6.3166e-12	CENPC
LSM10	4.08585e-16	1.48802	1	1	6.48793e-12	LSM10
ITCH	4.10675e-16	-2.64911	1	1	6.5211e-12	ITCH
LIN54	4.19178e-16	-2.75289	1	1	6.65613e-12	LIN54
ZBTB1	4.23406e-16	-2.47866	1	1	6.72326e-12	ZBTB1
C20orf27	4.26978e-16	1.33753	1	1	6.77999e-12	C20orf27
POP5	4.36438e-16	0.600961	1	1	6.93019e-12	POP5
LIMS1	4.45583e-16	1.36843	1	1	7.07541e-12	LIMS1
COA1	4.5401e-16	1.43458	1	1	7.20922e-12	COA1
SLC25A13	4.56694e-16	-0.0990034	1	1	7.25184e-12	SLC25A13
EFR3B	4.72465e-16	-4.2707	1	1	7.50227e-12	EFR3B
S100A3	4.82721e-16	-1.70696	0.724	0	7.66513e-12	S100A3
STRN3	4.91906e-16	-3.99932	1	1	7.81097e-12	STRN3
ZNF709	5.00837e-16	-4.36631	0.793	1	7.95279e-12	ZNF709
FIG4	5.00844e-16	-2.93229	1	1	7.9529e-12	FIG4
TMEM158	5.09353e-16	2.25702	1	1	8.08801e-12	TMEM158
SARNP	5.11876e-16	-2.91152	1	1	8.12809e-12	SARNP
ZCCHC4	5.1237e-16	-2.52496	1	1	8.13592e-12	ZCCHC4
IFT122	5.47944e-16	-2.97943	1	1	8.70081e-12	IFT122
RABGAP1L	5.49146e-16	-3.5223	1	1	8.71989e-12	RABGAP1L
C15orf41	5.55815e-16	-3.02565	1	1	8.82579e-12	C15orf41
DCXR	5.79489e-16	0.969734	1	1	9.20171e-12	DCXR
ENTPD3-AS1	5.83766e-16	-0.648258	1	1	9.26962e-12	ENTPD3-AS1
AC010894.3	5.89533e-16	-1.93706	0.966	0.5	9.36119e-12	AC010894.3
ZSWIM1	5.93724e-16	-3.16262	1	1	9.42774e-12	ZSWIM1
C9orf116	5.95891e-16	-0.481823	1	1	9.46215e-12	C9orf116
ZBTB7A	6.13064e-16	0.323506	1	1	9.73484e-12	ZBTB7A
IST1	6.18177e-16	-2.51655	1	1	9.81603e-12	IST1
SCO2	6.30573e-16	0.0357381	1	1	1.00129e-11	SCO2
ZNF266	6.34163e-16	-2.81576	1	1	1.00699e-11	ZNF266
ZNF384	6.35391e-16	-2.94254	1	1	1.00894e-11	ZNF384
TUBB3	6.45887e-16	-6.33815	0.793	1	1.0256e-11	TUBB3
C12orf4	6.46473e-16	-2.55238	1	1	1.02653e-11	C12orf4
SETD9	6.54356e-16	0.377925	1	1	1.03905e-11	SETD9
CSTF1	6.63322e-16	-2.07716	1	1	1.05329e-11	CSTF1
P3H4	6.75749e-16	0.468557	1	1	1.07302e-11	P3H4
KDM7A	6.81299e-16	-3.28243	1	1	1.08183e-11	KDM7A
CCDC117	7.06907e-16	-2.69162	1	1	1.1225e-11	CCDC117
ZNF26	7.3428e-16	-2.41118	1	1	1.16596e-11	ZNF26
WIPI2	7.5807e-16	0.574338	1	1	1.20374e-11	WIPI2
TRAF6	7.60416e-16	-3.45	1	1	1.20747e-11	TRAF6
GSTK1	7.62927e-16	0.750074	1	1	1.21145e-11	GSTK1
HCN2	7.67483e-16	-1.72064	0.862	0.5	1.21869e-11	HCN2
SART3	8.10951e-16	-2.40721	1	1	1.28771e-11	SART3
OSBPL2	8.34485e-16	-2.3063	1	1	1.32508e-11	OSBPL2
SZT2	8.49997e-16	-3.60091	1	1	1.34971e-11	SZT2
ANGEL2	8.86866e-16	-2.11823	1	1	1.40825e-11	ANGEL2
OPHN1	9.49236e-16	-3.49014	1	1	1.50729e-11	OPHN1
WDPCP	9.61686e-16	-2.89355	1	1	1.52706e-11	WDPCP
C6orf52	9.88545e-16	-0.659882	1	1	1.56971e-11	C6orf52
PPP1R15B	1.02272e-15	-2.9083	1	1	1.62398e-11	PPP1R15B
ARID1A	1.06603e-15	-3.95271	1	1	1.69275e-11	ARID1A
ZC3H10	1.06966e-15	-2.85155	1	1	1.69852e-11	ZC3H10
RRS1	1.09031e-15	-0.226518	1	1	1.7313e-11	RRS1
DUSP1	1.09911e-15	-5.35006	1	1	1.74528e-11	DUSP1
HUWE1	1.09966e-15	-3.59836	1	1	1.74615e-11	HUWE1
SNRPC	1.11832e-15	0.932095	1	1	1.77577e-11	SNRPC
HSCB	1.14379e-15	-0.0221276	1	1	1.81623e-11	HSCB
PSME1	1.17553e-15	1.07768	1	1	1.86662e-11	PSME1
B3GALT6	1.21701e-15	0.640045	1	1	1.93248e-11	B3GALT6
SLC27A5	1.22434e-15	0.401603	1	1	1.94413e-11	SLC27A5
CETN3	1.27461e-15	0.581734	1	1	2.02396e-11	CETN3
CLIC1	1.30672e-15	2.00257	1	1	2.07495e-11	CLIC1
STUB1	1.31543e-15	1.3014	1	1	2.08878e-11	STUB1
ZNF568	1.33418e-15	-2.76224	1	1	2.11855e-11	ZNF568
KIAA1143	1.36652e-15	0.151479	1	1	2.1699e-11	KIAA1143
LSM14B	1.39049e-15	-0.417869	1	1	2.20796e-11	LSM14B
TSC22D2	1.41441e-15	-3.04373	1	1	2.24594e-11	TSC22D2
TTC33	1.48518e-15	-2.97505	1	1	2.35832e-11	TTC33
CKS1B	1.48669e-15	1.92491	1	1	2.36072e-11	CKS1B
DYNC2H1	1.51257e-15	-3.32608	1	1	2.40181e-11	DYNC2H1
MSRB1	1.55617e-15	0.138226	1	1	2.47104e-11	MSRB1
RBM22	1.56664e-15	-2.3382	1	1	2.48767e-11	RBM22
ZNF688	1.57896e-15	-0.258574	1	1	2.50723e-11	ZNF688
WDR27	1.60759e-15	-2.8734	1	1	2.5527e-11	WDR27
PTTG1	1.62125e-15	1.8987	1	1	2.57438e-11	PTTG1
EXOC3-AS1	1.65917e-15	-0.463522	1	1	2.63459e-11	EXOC3-AS1
SYT11	1.70517e-15	-3.80987	1	1	2.70764e-11	SYT11
RP9	1.74343e-15	0.753824	1	1	2.76839e-11	RP9
CCDC88B	1.74859e-15	-1.14277	1	0.75	2.77659e-11	CCDC88B
PLEKHA4	1.75515e-15	1.35126	1	1	2.787e-11	PLEKHA4
ZBTB49	1.79115e-15	-3.10289	0.966	1	2.84416e-11	ZBTB49
GTF3C1	1.80553e-15	-3.00973	1	1	2.867e-11	GTF3C1
MYSM1	1.80602e-15	-2.62818	1	1	2.86778e-11	MYSM1
C16orf70	1.80631e-15	-2.71249	1	1	2.86824e-11	C16orf70
ZIM2-AS1	1.87301e-15	-0.852959	0.828	0.75	2.97416e-11	ZIM2-AS1
BLOC1S3	1.87809e-15	-3.05993	1	1	2.98222e-11	BLOC1S3
KIAA1328	1.88374e-15	-3.13512	1	1	2.9912e-11	KIAA1328
SUGP1	1.88992e-15	-2.63062	1	1	3.00101e-11	SUGP1
MED20	1.89429e-15	-2.55381	1	1	3.00795e-11	MED20
ATR	1.98741e-15	-2.52285	1	1	3.15581e-11	ATR
ZFYVE1	1.98943e-15	-2.80993	1	1	3.15902e-11	ZFYVE1
UHRF1BP1	1.99554e-15	-3.25841	1	1	3.16872e-11	UHRF1BP1
TCTN2	2.00823e-15	-3.20892	1	1	3.18887e-11	TCTN2
APC	2.10743e-15	-3.42623	1	1	3.34639e-11	APC
MPLKIP	2.12006e-15	0.888913	1	1	3.36644e-11	MPLKIP
TACO1	2.15519e-15	0.03515	1	1	3.42223e-11	TACO1
RBM33	2.18027e-15	-2.49242	1	1	3.46205e-11	RBM33
CDC23	2.30215e-15	-2.46489	1	1	3.65558e-11	CDC23
DYNC1H1	2.32635e-15	-2.38469	1	1	3.69401e-11	DYNC1H1
NTHL1	2.33963e-15	0.294095	1	1	3.7151e-11	NTHL1
NUDT8	2.34819e-15	-0.29306	1	1	3.72868e-11	NUDT8
ISCU	2.3646e-15	0.866039	1	1	3.75475e-11	ISCU
UQCRHL	2.40933e-15	-0.499765	1	1	3.82577e-11	UQCRHL
USP11	2.45e-15	-3.1365	1	1	3.89036e-11	USP11
DCUN1D3	2.5028e-15	-3.15085	1	1	3.97419e-11	DCUN1D3
GIPC1	2.54799e-15	0.666507	1	1	4.04595e-11	GIPC1
DPM1	2.56278e-15	0.587551	1	1	4.06944e-11	DPM1
AC005523.2	2.71905e-15	-3.28634	1	1	4.31759e-11	AC005523.2
ZNF428	2.73135e-15	1.55095	1	1	4.3371e-11	ZNF428
BBOX1-AS1	2.922e-15	-2.30563	0.828	0.25	4.63984e-11	BBOX1-AS1
KDELR2	2.94381e-15	1.78876	1	1	4.67447e-11	KDELR2
GLI4	2.97077e-15	-0.935035	1	1	4.71729e-11	GLI4
SPOCD1	3.02537e-15	-0.255659	0.931	0.5	4.80399e-11	SPOCD1
AC003092.1	3.08573e-15	-2.53855	0.276	0	4.89983e-11	AC003092.1
NAGLU	3.106e-15	-0.572779	1	1	4.93202e-11	NAGLU
ZBTB5	3.18881e-15	-3.38107	1	1	5.06351e-11	ZBTB5
MIA3	3.22728e-15	-2.49667	1	1	5.1246e-11	MIA3
STXBP1	3.28196e-15	-2.711	1	1	5.21142e-11	STXBP1
SPICE1	3.28729e-15	-3.08268	1	1	5.21988e-11	SPICE1
NME3	3.41374e-15	1.48525	1	1	5.42068e-11	NME3
PARP6	3.42801e-15	-2.91389	1	1	5.44334e-11	PARP6
TTI1	3.47365e-15	-2.53345	1	1	5.51581e-11	TTI1
STK32C	3.53353e-15	-0.0527092	1	1	5.6109e-11	STK32C
RRAS	3.62844e-15	0.47422	1	1	5.7616e-11	RRAS
FBL	3.64469e-15	1.01847	1	1	5.7874e-11	FBL
TCEAL3	3.84445e-15	0.926314	1	1	6.1046e-11	TCEAL3
NEK1	3.98206e-15	-2.42831	1	1	6.32312e-11	NEK1
GTPBP6	4.0171e-15	0.567558	1	1	6.37876e-11	GTPBP6
INVS	4.06463e-15	-2.89833	1	1	6.45423e-11	INVS
RBMX2	4.14945e-15	0.695426	1	1	6.58891e-11	RBMX2
SVBP	4.1895e-15	0.595061	1	1	6.6525e-11	SVBP
PRELID1	4.25462e-15	2.02517	1	1	6.75591e-11	PRELID1
DAZAP2	4.26222e-15	-1.9866	1	1	6.76798e-11	DAZAP2
ZNF511	4.26638e-15	0.55826	1	1	6.77459e-11	ZNF511
NFX1	4.28136e-15	-2.84347	1	1	6.79837e-11	NFX1
MRPL21	4.3326e-15	1.16057	1	1	6.87974e-11	MRPL21
PTP4A2	4.37427e-15	1.74878	1	1	6.9459e-11	PTP4A2
LCTL	4.41176e-15	-0.628475	1	0.75	7.00543e-11	LCTL
ZNF597	4.43389e-15	-3.03002	0.966	1	7.04057e-11	ZNF597
SCAPER	4.43953e-15	-3.15311	1	1	7.04953e-11	SCAPER
C10orf88	4.49331e-15	-2.70034	1	1	7.13492e-11	C10orf88
GPR89B	4.62814e-15	-3.20016	1	1	7.34902e-11	GPR89B
VCPIP1	4.63444e-15	-2.70943	1	1	7.35902e-11	VCPIP1
ZNF543	4.64216e-15	-3.75825	0.931	1	7.37128e-11	ZNF543
EPG5	4.70388e-15	-2.95012	1	1	7.46929e-11	EPG5
C1orf50	4.70447e-15	-0.245125	1	1	7.47022e-11	C1orf50
ANKRD54	4.74257e-15	-2.35973	1	1	7.53073e-11	ANKRD54
PHC1	5.01439e-15	-2.96157	1	1	7.96235e-11	PHC1
C12orf10	5.06528e-15	0.300708	1	1	8.04316e-11	C12orf10
RNF145	5.12982e-15	1.38424	1	1	8.14565e-11	RNF145
RTN3	5.23929e-15	-2.85163	1	1	8.31946e-11	RTN3
KMT2D	5.26743e-15	-3.6899	1	1	8.36416e-11	KMT2D
PUM1	5.38259e-15	-2.4072	1	1	8.54701e-11	PUM1
RAB33B	5.41238e-15	-3.79565	0.966	1	8.59432e-11	RAB33B
TM9SF1	5.51749e-15	-2.67963	1	1	8.76122e-11	TM9SF1
HMGA1	5.55922e-15	3.19815	1	1	8.82748e-11	HMGA1
PCMTD1	5.57727e-15	-3.34912	1	1	8.85615e-11	PCMTD1
TMEM203	5.68815e-15	0.632887	1	1	9.03221e-11	TMEM203
SKIL	5.69581e-15	-4.46981	1	1	9.04437e-11	SKIL
DGUOK	5.90677e-15	1.1793	1	1	9.37936e-11	DGUOK
ZNF2	6.1034e-15	-2.69247	1	1	9.69159e-11	ZNF2
PCNT	6.23135e-15	-2.94094	1	1	9.89476e-11	PCNT
TTC17	6.28413e-15	-2.31431	1	1	9.97858e-11	TTC17
RITA1	6.32231e-15	-0.290037	1	1	1.00392e-10	RITA1
YEATS2	6.41908e-15	-3.25509	1	1	1.01929e-10	YEATS2
NOMO3	6.44574e-15	-3.1224	1	1	1.02352e-10	NOMO3
CDKAL1	7.14607e-15	-2.93523	1	1	1.13472e-10	CDKAL1
SURF2	7.18426e-15	0.710634	1	1	1.14079e-10	SURF2
CD70	7.19689e-15	0.320104	0.655	0.25	1.14279e-10	CD70
SLC39A9	7.36726e-15	-2.42951	1	1	1.16985e-10	SLC39A9
TXN	7.43701e-15	2.86313	1	1	1.18092e-10	TXN
SLC25A45	7.45182e-15	-1.51858	1	1	1.18327e-10	SLC25A45
CASC3	7.63377e-15	-2.68439	1	1	1.21217e-10	CASC3
TRIM68	7.71476e-15	-2.92604	1	1	1.22503e-10	TRIM68
SH3BGRL3	7.77416e-15	2.21811	1	1	1.23446e-10	SH3BGRL3
SPIN1	7.92011e-15	-2.93869	1	1	1.25763e-10	SPIN1
RNF2	8.0773e-15	-2.41243	1	1	1.28259e-10	RNF2
PUM2	8.92534e-15	-2.49306	1	1	1.41725e-10	PUM2
DHFR	8.9962e-15	0.895088	1	1	1.42851e-10	DHFR
SURF1	9.71251e-15	0.89042	1	1	1.54225e-10	SURF1
TMEM189	9.75395e-15	0.38539	1	1	1.54883e-10	TMEM189
ISG15	9.76198e-15	1.54373	1	1	1.5501e-10	ISG15
IGFBP2	9.84865e-15	4.00578	1	1	1.56387e-10	IGFBP2
PPRC1	1.01833e-14	-3.65779	1	1	1.61701e-10	PPRC1
PPP1R12B	1.02068e-14	-3.32701	1	1	1.62073e-10	PPP1R12B
ZSCAN22	1.03771e-14	-3.30581	0.966	1	1.64779e-10	ZSCAN22
CTR9	1.04267e-14	-2.22671	1	1	1.65565e-10	CTR9
MORN2	1.13042e-14	0.639044	1	1	1.79499e-10	MORN2
ZNF410	1.13414e-14	-5.44211	0.655	1	1.80091e-10	ZNF410
PWWP2A	1.15514e-14	-2.37962	1	1	1.83425e-10	PWWP2A
ABCC5	1.17402e-14	-2.75284	1	1	1.86423e-10	ABCC5
DHX8	1.17815e-14	-2.84716	1	1	1.87078e-10	DHX8
RAB36	1.19881e-14	-3.82006	0.966	1	1.90359e-10	RAB36
KAZALD1	1.21108e-14	-1.22175	1	0.5	1.92308e-10	KAZALD1
F12	1.21654e-14	0.165258	1	1	1.93174e-10	F12
HEBP1	1.22837e-14	0.345672	1	1	1.95052e-10	HEBP1
TCFL5	1.23187e-14	-1.25211	1	1	1.95609e-10	TCFL5
ZGRF1	1.23945e-14	-3.15173	1	1	1.96813e-10	ZGRF1
AAR2	1.26092e-14	-2.11565	1	1	2.00222e-10	AAR2
MKS1	1.30663e-14	-2.51145	1	1	2.0748e-10	MKS1
LAMTOR5	1.34034e-14	1.41244	1	1	2.12833e-10	LAMTOR5
TOLLIP-AS1	1.36371e-14	-1.58509	1	1	2.16543e-10	TOLLIP-AS1
PPWD1	1.38351e-14	-2.27573	1	1	2.19688e-10	PPWD1
FAM41C	1.39394e-14	-2.0376	0.966	1	2.21343e-10	FAM41C
TNFRSF12A	1.428e-14	2.87887	1	1	2.26753e-10	TNFRSF12A
NADK	1.45733e-14	-0.0601227	1	1	2.31409e-10	NADK
KDM6A	1.46085e-14	-3.16081	0.966	1	2.31968e-10	KDM6A
PET100	1.47909e-14	1.73018	1	1	2.34864e-10	PET100
CDKN2AIP	1.56573e-14	-2.56362	1	1	2.48622e-10	CDKN2AIP
BROX	1.58397e-14	-3.28992	1	1	2.51519e-10	BROX
ZNF436-AS1	1.59391e-14	-0.53594	1	1	2.53098e-10	ZNF436-AS1
TAF2	1.60519e-14	-2.30005	1	1	2.54888e-10	TAF2
NPAT	1.61081e-14	-2.54167	1	1	2.5578e-10	NPAT
BAD	1.61147e-14	0.96183	1	1	2.55886e-10	BAD
FAM3A	1.61154e-14	-0.0911137	1	1	2.55896e-10	FAM3A
MRPS26	1.61832e-14	1.04639	1	1	2.56973e-10	MRPS26
PRKACA	1.62325e-14	0.182214	1	1	2.57756e-10	PRKACA
HOTAIRM1	1.65344e-14	1.02987	0.897	0.75	2.62549e-10	HOTAIRM1
HMBS	1.68723e-14	0.254753	1	1	2.67915e-10	HMBS
ZKSCAN3	1.70271e-14	-3.32757	0.931	1	2.70374e-10	ZKSCAN3
ISL2	1.70382e-14	-1.91344	0.966	0.75	2.70549e-10	ISL2
SAP30	1.73775e-14	1.40086	1	1	2.75937e-10	SAP30
RPL5	1.89977e-14	1.59712	1	1	3.01664e-10	RPL5
CHST2	1.91786e-14	0.85427	1	1	3.04537e-10	CHST2
DNAJC18	1.95463e-14	-2.4803	1	1	3.10376e-10	DNAJC18
ASTE1	1.95817e-14	-2.70456	1	1	3.10938e-10	ASTE1
METTL7B	2.02835e-14	1.63445	1	1	3.22082e-10	METTL7B
C9orf40	2.05184e-14	0.100541	1	1	3.25812e-10	C9orf40
PAX6	2.16031e-14	-4.25459	1	1	3.43036e-10	PAX6
GTF2H5	2.19199e-14	1.7865	1	1	3.48066e-10	GTF2H5
RPL7	2.24434e-14	1.64928	1	1	3.56378e-10	RPL7
HMG20A	2.24459e-14	-2.48696	1	1	3.56418e-10	HMG20A
JTB	2.31693e-14	1.25846	1	1	3.67905e-10	JTB
ALMS1	2.32629e-14	-3.55461	1	1	3.69391e-10	ALMS1
CD151	2.34122e-14	2.01797	1	1	3.71763e-10	CD151
PMVK	2.3516e-14	0.657542	1	1	3.73411e-10	PMVK
TPGS1	2.41919e-14	0.699556	1	1	3.84143e-10	TPGS1
UBR4	2.42387e-14	-2.45671	1	1	3.84887e-10	UBR4
ISG20	2.43144e-14	-0.628041	1	1	3.86088e-10	ISG20
GSTZ1	2.44688e-14	0.418361	1	1	3.8854e-10	GSTZ1
CEP95	2.4616e-14	-2.47855	1	1	3.90878e-10	CEP95
OLA1	2.47799e-14	0.658123	1	1	3.9348e-10	OLA1
RBSN	2.5114e-14	-2.32731	1	1	3.98785e-10	RBSN
SAMD8	2.53335e-14	-3.47123	1	1	4.02271e-10	SAMD8
ZNF287	2.58987e-14	-2.80845	1	1	4.11246e-10	ZNF287
ATP6V0A1	2.59952e-14	-2.82123	1	1	4.12777e-10	ATP6V0A1
ZNF235	2.62355e-14	-3.51319	0.931	1	4.16594e-10	ZNF235
RNASEH2C	2.63237e-14	0.905919	1	1	4.17994e-10	RNASEH2C
TAF12	2.6585e-14	0.464087	1	1	4.22144e-10	TAF12
PUS1	2.69369e-14	-0.69894	1	1	4.27731e-10	PUS1
SGPL1	2.78202e-14	-3.56	1	1	4.41757e-10	SGPL1
DENND4A	2.88553e-14	-2.89652	1	1	4.58194e-10	DENND4A
UBE2W	2.89462e-14	-2.69518	1	1	4.59637e-10	UBE2W
PRKAR2A	2.96603e-14	0.465606	1	1	4.70976e-10	PRKAR2A
SEL1L	3.01476e-14	-2.72788	1	1	4.78714e-10	SEL1L
BEND3	3.07887e-14	-3.43216	0.966	1	4.88893e-10	BEND3
SYVN1	3.12811e-14	-3.32513	1	1	4.96712e-10	SYVN1
TXNL4A	3.20885e-14	1.6403	1	1	5.09534e-10	TXNL4A
ADNP	3.22672e-14	-2.32693	1	1	5.12371e-10	ADNP
HAUS3	3.34455e-14	-2.66633	1	1	5.3108e-10	HAUS3
NRGN	3.42022e-14	0.869659	1	1	5.43096e-10	NRGN
GABARAP	3.43422e-14	-3.40561	1	1	5.4532e-10	GABARAP
DPY30	3.51531e-14	1.07084	1	1	5.58195e-10	DPY30
ZNF335	3.56417e-14	-3.10814	1	1	5.65955e-10	ZNF335
CD3EAP	3.77618e-14	-0.558017	1	1	5.9962e-10	CD3EAP
TRMT10A	3.79656e-14	-0.75602	1	1	6.02855e-10	TRMT10A
SMIM19	3.88464e-14	0.814166	1	1	6.16841e-10	SMIM19
APH1A	3.97237e-14	0.868353	1	1	6.30772e-10	APH1A
CHCHD3	4.05013e-14	1.09636	1	1	6.4312e-10	CHCHD3
GPR137	4.26314e-14	0.19262	1	1	6.76943e-10	GPR137
NDUFS3	4.2706e-14	0.668542	1	1	6.78129e-10	NDUFS3
CCP110	4.39592e-14	-2.5036	1	1	6.98028e-10	CCP110
ST7-AS1	4.50857e-14	-1.33626	0.931	0.5	7.15916e-10	ST7-AS1
HOXA7	4.53389e-14	0.236029	0.862	0.25	7.19937e-10	HOXA7
SLC39A3	4.68443e-14	0.715516	1	1	7.43841e-10	SLC39A3
CDKL3	4.75699e-14	-1.00557	1	1	7.55362e-10	CDKL3
NAPB	4.81349e-14	-2.62244	1	1	7.64335e-10	NAPB
C9orf72	5.04949e-14	-4.15669	0.966	1	8.01809e-10	C9orf72
WBP1	5.09796e-14	-3.87305	0.966	1	8.09504e-10	WBP1
USP3	5.14144e-14	-2.71828	1	1	8.16409e-10	USP3
PIGA	5.15589e-14	-3.23793	0.966	1	8.18704e-10	PIGA
NAA15	5.16961e-14	-2.7569	1	1	8.20882e-10	NAA15
VPS39	5.25733e-14	-2.9464	1	1	8.34812e-10	VPS39
AIMP1	5.45006e-14	0.708378	1	1	8.65415e-10	AIMP1
MFSD8	5.51524e-14	-2.77263	1	1	8.75765e-10	MFSD8
DENND1A	5.64706e-14	-3.14026	1	1	8.96697e-10	DENND1A
RASSF8	5.94312e-14	0.16542	1	1	9.43709e-10	RASSF8
GFOD2	6.12545e-14	-2.4585	1	1	9.72661e-10	GFOD2
GNG11	6.24539e-14	3.01251	1	1	9.91706e-10	GNG11
ARHGAP1	6.25463e-14	-2.82391	1	1	9.93172e-10	ARHGAP1
YOD1	6.44492e-14	-2.96584	0.966	1	1.02339e-09	YOD1
BRD3	6.62552e-14	-2.87004	1	1	1.05207e-09	BRD3
WDR35	6.76331e-14	-3.02694	1	1	1.07395e-09	WDR35
SPAG9	6.99643e-14	-2.54372	1	1	1.11096e-09	SPAG9
MRPS21	7.34603e-14	1.34562	1	1	1.16648e-09	MRPS21
ZNF736	7.46235e-14	-2.84186	1	1	1.18495e-09	ZNF736
ACTR8	7.83589e-14	-2.46769	1	1	1.24426e-09	ACTR8
TM9SF2	7.8416e-14	-2.47262	1	1	1.24517e-09	TM9SF2
TARDBP	8.1008e-14	-2.14234	1	1	1.28633e-09	TARDBP
ESF1	8.13809e-14	0.617287	1	1	1.29225e-09	ESF1
TMEM223	8.20761e-14	0.173931	1	1	1.30329e-09	TMEM223
CD320	8.21372e-14	1.18786	1	1	1.30426e-09	CD320
ARL16	8.25402e-14	0.892863	1	1	1.31066e-09	ARL16
EWSR1	8.35858e-14	-2.8234	1	1	1.32726e-09	EWSR1
CHORDC1	8.39578e-14	-3.30741	1	1	1.33317e-09	CHORDC1
CEP55	8.74118e-14	0.224172	1	1	1.38801e-09	CEP55
PDS5B	8.91369e-14	-3.25723	1	1	1.4154e-09	PDS5B
ZNF449	8.97853e-14	-2.74997	1	1	1.4257e-09	ZNF449
MSL2	9.07685e-14	-2.95235	1	1	1.44131e-09	MSL2
GPATCH4	9.20886e-14	0.521956	1	1	1.46228e-09	GPATCH4
B4GALT5	9.54426e-14	0.567824	1	1	1.51553e-09	B4GALT5
SETX	1.01479e-13	-2.63657	1	1	1.61138e-09	SETX
HCG18	1.02357e-13	-2.83143	1	1	1.62532e-09	HCG18
RFC1	1.03062e-13	0.41624	1	1	1.63653e-09	RFC1
TOX4	1.03655e-13	-2.55744	1	1	1.64593e-09	TOX4
FBXW5	1.0706e-13	0.482958	1	1	1.70001e-09	FBXW5
PPP2CA	1.09024e-13	-2.16596	1	1	1.73119e-09	PPP2CA
ST3GAL4	1.11605e-13	0.778689	1	1	1.77218e-09	ST3GAL4
SPEN	1.11797e-13	-2.83272	1	1	1.77523e-09	SPEN
ALKBH5	1.1543e-13	0.527068	1	1	1.83291e-09	ALKBH5
C2orf68	1.22955e-13	-2.70842	1	1	1.9524e-09	C2orf68
ASH2L	1.3044e-13	-2.10844	1	1	2.07126e-09	ASH2L
TMLHE	1.30945e-13	-2.98271	1	1	2.07927e-09	TMLHE
TIGD1	1.35635e-13	-2.88971	1	1	2.15375e-09	TIGD1
FEM1C	1.3567e-13	-3.27677	1	1	2.1543e-09	FEM1C
DNMT1	1.36008e-13	0.814031	1	1	2.15968e-09	DNMT1
SUB1	1.36978e-13	1.81313	1	1	2.17507e-09	SUB1
WSB1	1.3774e-13	-2.69734	1	1	2.18717e-09	WSB1
PRDM10	1.37994e-13	-3.03394	0.966	1	2.1912e-09	PRDM10
ANKRD50	1.40245e-13	-3.05746	1	1	2.22696e-09	ANKRD50
RMND5A	1.41035e-13	-2.68805	1	1	2.2395e-09	RMND5A
DPM2	1.45232e-13	0.633625	1	1	2.30614e-09	DPM2
C12orf73	1.4804e-13	0.0260375	1	1	2.35072e-09	C12orf73
HCFC1R1	1.50658e-13	1.82889	1	1	2.3923e-09	HCFC1R1
SLC9A8	1.5669e-13	-3.03916	1	1	2.48808e-09	SLC9A8
MRPL2	1.57726e-13	0.170251	1	1	2.50454e-09	MRPL2
MMS22L	1.61503e-13	-2.85423	1	1	2.56451e-09	MMS22L
SMARCC2	1.6217e-13	-2.53805	1	1	2.5751e-09	SMARCC2
SRSF9	1.62207e-13	1.42448	1	1	2.57569e-09	SRSF9
SCARF2	1.67193e-13	-0.656239	1	1	2.65486e-09	SCARF2
LINC00941	1.68607e-13	-1.80074	0.655	0	2.67731e-09	LINC00941
OSMR-AS1	1.68614e-13	-1.99358	0.931	1	2.67742e-09	OSMR-AS1
HMGCR	1.70673e-13	-3.02044	1	1	2.71011e-09	HMGCR
ARPC5L	1.76712e-13	1.05666	1	1	2.80601e-09	ARPC5L
GLRX5	1.77131e-13	1.93068	1	1	2.81267e-09	GLRX5
ZNF615	1.77821e-13	-3.15156	1	1	2.82361e-09	ZNF615
CUL9	1.79528e-13	-3.41498	1	1	2.85072e-09	CUL9
CSRNP1	1.80755e-13	-3.90393	1	1	2.8702e-09	CSRNP1
TMEM94	1.87246e-13	-3.54582	1	1	2.97329e-09	TMEM94
COG8	1.88459e-13	-2.07493	1	1	2.99254e-09	COG8
GOLGA6L9	1.88733e-13	-3.45561	0.966	1	2.99688e-09	GOLGA6L9
FCRLB	1.92209e-13	-1.39255	1	0.75	3.05208e-09	FCRLB
ERP29	1.96038e-13	0.872535	1	1	3.11289e-09	ERP29
ARFGAP2	2.02004e-13	-2.04655	1	1	3.20762e-09	ARFGAP2
VASP	2.04376e-13	0.261735	1	1	3.24529e-09	VASP
UNC93B1	2.09081e-13	-0.946511	1	0.75	3.32e-09	UNC93B1
AFTPH	2.09688e-13	-2.10829	1	1	3.32963e-09	AFTPH
R3HDM2	2.12096e-13	-2.61589	1	1	3.36786e-09	R3HDM2
KANSL1-AS1	2.24002e-13	-0.628138	1	1	3.55692e-09	KANSL1-AS1
MIR100HG	2.26535e-13	-6.16132	0.69	1	3.59715e-09	MIR100HG
ATRN	2.2667e-13	-2.95201	1	1	3.59929e-09	ATRN
PIF1	2.30978e-13	-0.159577	1	1	3.6677e-09	PIF1
NFXL1	2.35982e-13	-2.80331	1	1	3.74715e-09	NFXL1
IER5	2.40302e-13	0.633563	1	1	3.81576e-09	IER5
ZNF140	2.42464e-13	-2.89508	1	1	3.85008e-09	ZNF140
MAPK10	2.45161e-13	-4.53321	1	1	3.89291e-09	MAPK10
CDK5	2.45359e-13	0.298631	1	1	3.89606e-09	CDK5
LRRC40	2.62569e-13	-2.59133	1	1	4.16933e-09	LRRC40
HNRNPUL2	2.66375e-13	0.046723	1	1	4.22976e-09	HNRNPUL2
PRADC1	2.69682e-13	0.453341	1	1	4.28228e-09	PRADC1
PRDM2	2.73074e-13	-2.94911	1	1	4.33615e-09	PRDM2
RALGAPA2	2.73536e-13	-3.04983	1	1	4.34348e-09	RALGAPA2
ANKRD9	2.75435e-13	0.099202	1	1	4.37363e-09	ANKRD9
UBA6	2.81173e-13	-2.92718	1	1	4.46475e-09	UBA6
JMJD1C	2.88088e-13	-2.62215	1	1	4.57454e-09	JMJD1C
RILP	2.94151e-13	-1.36	1	0.75	4.67082e-09	RILP
MED14OS	2.97344e-13	-1.74197	1	1	4.72152e-09	MED14OS
FOXJ2	2.98267e-13	-3.09892	1	1	4.73618e-09	FOXJ2
CCDC61	2.98603e-13	-1.68828	1	1	4.74152e-09	CCDC61
CCNL2	3.03458e-13	-2.52754	1	1	4.81861e-09	CCNL2
PTCD3	3.04541e-13	-2.15213	1	1	4.83581e-09	PTCD3
CPSF4	3.09947e-13	0.0789252	1	1	4.92165e-09	CPSF4
CCDC58	3.1933e-13	0.163818	1	1	5.07063e-09	CCDC58
LINC00342	3.19744e-13	-3.73974	1	1	5.07721e-09	LINC00342
SENP5	3.2706e-13	-2.8595	1	1	5.19339e-09	SENP5
SMARCAD1	3.37129e-13	-2.34071	1	1	5.35328e-09	SMARCAD1
RASSF1-AS1	3.46952e-13	-1.63285	0.966	0.5	5.50926e-09	RASSF1-AS1
VPS8	3.51754e-13	-2.35082	1	1	5.58551e-09	VPS8
PLEKHH3	3.55873e-13	-0.484998	1	1	5.65091e-09	PLEKHH3
SLC25A12	3.58542e-13	-2.60136	1	1	5.69329e-09	SLC25A12
PRRC1	3.61033e-13	-2.41047	1	1	5.73285e-09	PRRC1
DCAF5	3.64931e-13	-2.4864	1	1	5.79474e-09	DCAF5
NDUFV3	3.65219e-13	1.0377	1	1	5.79932e-09	NDUFV3
NANOS3	3.67308e-13	-1.42608	1	1	5.83249e-09	NANOS3
MIR762HG	3.76808e-13	-0.618502	1	1	5.98334e-09	MIR762HG
ZNF609	3.89217e-13	-2.79923	1	1	6.18038e-09	ZNF609
EGR1	3.91673e-13	-6.98943	1	1	6.21938e-09	EGR1
ANAPC15	3.94569e-13	0.874114	1	1	6.26536e-09	ANAPC15
C19orf25	3.98066e-13	0.453297	1	1	6.3209e-09	C19orf25
SIN3A	4.03909e-13	-2.66601	1	1	6.41367e-09	SIN3A
UGDH	4.05716e-13	-2.74253	1	1	6.44237e-09	UGDH
POGK	4.20226e-13	-2.46611	1	1	6.67277e-09	POGK
URM1	4.22983e-13	0.747053	1	1	6.71655e-09	URM1
DDX21	4.2788e-13	1.05984	1	1	6.79431e-09	DDX21
C1QL1	4.30107e-13	1.61247	1	1	6.82966e-09	C1QL1
CBLB	4.38e-13	-3.37145	1	1	6.955e-09	CBLB
RDH5	4.38288e-13	-0.438394	1	1	6.95958e-09	RDH5
RNPC3	4.55526e-13	-2.58998	1	1	7.2333e-09	RNPC3
MIR4435-2HG	4.6082e-13	1.72724	1	1	7.31735e-09	MIR4435-2HG
SEC61A2	4.61375e-13	-3.06585	1	1	7.32617e-09	SEC61A2
MFSD14A	4.72951e-13	-2.44551	1	1	7.50998e-09	MFSD14A
LENG1	4.78394e-13	0.0920933	1	1	7.59642e-09	LENG1
SERPINE1	4.79579e-13	1.68522	1	0.75	7.61523e-09	SERPINE1
ZNF516	4.89277e-13	-3.32113	1	1	7.76923e-09	ZNF516
CLTB	4.91268e-13	1.15598	1	1	7.80084e-09	CLTB
GTF3A	4.96454e-13	1.426	1	1	7.88319e-09	GTF3A
TOP1	5.00123e-13	0.953518	1	1	7.94146e-09	TOP1
ANKRD17	5.0226e-13	-2.30887	1	1	7.97538e-09	ANKRD17
PPP4R2	5.04603e-13	0.290473	1	1	8.01259e-09	PPP4R2
CNEP1R1	5.04787e-13	-2.84715	1	1	8.01551e-09	CNEP1R1
LYAR	5.15023e-13	0.76735	1	1	8.17805e-09	LYAR
RASSF8-AS1	5.16316e-13	-0.109765	1	1	8.19858e-09	RASSF8-AS1
CNFN	5.18732e-13	-1.57275	0.931	1	8.23694e-09	CNFN
CALD1	5.19216e-13	2.59156	1	1	8.24463e-09	CALD1
ACOX3	5.21158e-13	-2.53502	1	1	8.27547e-09	ACOX3
GSPT1	5.2306e-13	0.23917	1	1	8.30566e-09	GSPT1
TRMT6	5.41771e-13	0.351298	1	1	8.60278e-09	TRMT6
HMMR	5.48771e-13	0.249795	1	1	8.71393e-09	HMMR
WWP2	5.54873e-13	-2.64549	1	1	8.81083e-09	WWP2
LYRM4	5.61227e-13	0.712844	1	1	8.91172e-09	LYRM4
RAB34	5.665e-13	1.8523	1	1	8.99546e-09	RAB34
NME4	5.72595e-13	2.05842	1	1	9.09224e-09	NME4
BRD7	5.79738e-13	0.833105	1	1	9.20566e-09	BRD7
PPM1D	5.89217e-13	-2.80593	1	1	9.35618e-09	PPM1D
API5	6.04235e-13	-2.46755	1	1	9.59465e-09	API5
ADAR	6.14709e-13	-2.62531	1	1	9.76097e-09	ADAR
ZC3H15	6.19212e-13	0.477897	1	1	9.83246e-09	ZC3H15
SPECC1L	6.23375e-13	-3.0274	1	1	9.89858e-09	SPECC1L
TMEM135	6.56083e-13	-2.94274	1	1	1.04179e-08	TMEM135
PLXNB1	6.87069e-13	-3.56269	1	1	1.091e-08	PLXNB1
MEA1	6.90202e-13	0.486143	1	1	1.09597e-08	MEA1
IFRD2	6.99347e-13	0.501102	1	1	1.11049e-08	IFRD2
INSR	7.08092e-13	-4.2212	0.966	1	1.12438e-08	INSR
GUK1	7.18729e-13	1.63277	1	1	1.14127e-08	GUK1
SNAPC2	7.21274e-13	0.186467	1	1	1.14531e-08	SNAPC2
LRR1	7.23919e-13	0.487523	1	1	1.14951e-08	LRR1
SREK1	7.28114e-13	-1.78607	1	1	1.15617e-08	SREK1
ZNF333	7.33304e-13	-3.13421	1	1	1.16441e-08	ZNF333
PDE4DIP	7.53224e-13	-3.73674	1	1	1.19605e-08	PDE4DIP
TMEM147	7.53683e-13	1.31761	1	1	1.19677e-08	TMEM147
TRPT1	7.63263e-13	0.0452448	1	1	1.21199e-08	TRPT1
PPIL4	7.76307e-13	-2.39519	1	1	1.2327e-08	PPIL4
WDR7	7.87932e-13	-2.90636	1	1	1.25116e-08	WDR7
MRPL14	7.9824e-13	1.51242	1	1	1.26752e-08	MRPL14
IQCJ-SCHIP1	8.05691e-13	-3.48204	0.966	1	1.27936e-08	IQCJ-SCHIP1
ZNF484	8.17527e-13	-3.71038	0.931	1	1.29815e-08	ZNF484
ATG13	8.25691e-13	-2.84801	1	1	1.31112e-08	ATG13
DUS1L	8.25773e-13	0.318663	1	1	1.31125e-08	DUS1L
IFI27L2	8.44594e-13	1.75646	1	1	1.34113e-08	IFI27L2
CNNM3	8.47259e-13	-2.96641	1	1	1.34536e-08	CNNM3
CAMK2N2	8.61606e-13	-0.470977	1	1	1.36814e-08	CAMK2N2
RANBP2	8.64673e-13	-2.7688	1	1	1.37302e-08	RANBP2
BUD31	8.76373e-13	1.14141	1	1	1.39159e-08	BUD31
MRPS18C	8.81436e-13	0.932207	1	1	1.39963e-08	MRPS18C
MSH6	8.84392e-13	-2.34532	1	1	1.40433e-08	MSH6
NUDT2	9.08193e-13	0.383298	1	1	1.44212e-08	NUDT2
NDUFV2	9.13986e-13	0.979192	1	1	1.45132e-08	NDUFV2
NT5M	9.17874e-13	-0.95617	1	0.75	1.45749e-08	NT5M
ING3	9.2706e-13	-2.96285	1	1	1.47208e-08	ING3
AC099850.1	9.31479e-13	-2.56242	0.724	0	1.4791e-08	AC099850.1
ANXA2R	9.48002e-13	0.101161	1	0.5	1.50533e-08	ANXA2R
PIK3C3	9.51638e-13	-2.60237	1	1	1.51111e-08	PIK3C3
KNOP1	9.74645e-13	0.717296	1	1	1.54764e-08	KNOP1
IFT172	1.00858e-12	-2.94102	1	1	1.60153e-08	IFT172
ERCC6	1.01117e-12	-3.5566	0.931	1	1.60563e-08	ERCC6
DNAAF5	1.02747e-12	-0.533088	1	1	1.63151e-08	DNAAF5
CDKN3	1.03434e-12	1.77933	1	1	1.64242e-08	CDKN3
TUBGCP3	1.04828e-12	-2.50971	1	1	1.66456e-08	TUBGCP3
NR2C1	1.06162e-12	-2.32728	1	1	1.68575e-08	NR2C1
NACAD	1.07874e-12	-3.61578	1	1	1.71293e-08	NACAD
NUBP2	1.09085e-12	0.141312	1	1	1.73217e-08	NUBP2
SEPHS2	1.10612e-12	-3.89917	0.828	1	1.7564e-08	SEPHS2
NCOA4	1.11818e-12	-2.80348	1	1	1.77556e-08	NCOA4
LMBRD2	1.12155e-12	-2.49224	1	1	1.78091e-08	LMBRD2
HOXA-AS2	1.13004e-12	-0.422877	0.897	0.5	1.79439e-08	HOXA-AS2
ZNF280C	1.13485e-12	-3.1442	1	1	1.80202e-08	ZNF280C
SIX1	1.14111e-12	0.165194	1	0.75	1.81196e-08	SIX1
FTH1	1.17049e-12	2.06384	1	1	1.85863e-08	FTH1
SRP19	1.18048e-12	0.421407	1	1	1.87449e-08	SRP19
DNAJC30	1.19699e-12	-0.0380794	1	1	1.9007e-08	DNAJC30
MYH10	1.19758e-12	-2.78294	1	1	1.90163e-08	MYH10
TFPT	1.20355e-12	0.498282	1	1	1.91112e-08	TFPT
GTDC1	1.27848e-12	-2.74679	1	1	2.03009e-08	GTDC1
GBF1	1.28151e-12	-3.32572	1	1	2.03491e-08	GBF1
FRS2	1.32483e-12	-2.62815	1	1	2.1037e-08	FRS2
CDK20	1.33936e-12	-3.03231	1	1	2.12677e-08	CDK20
SUFU	1.34673e-12	-3.68723	1	1	2.13847e-08	SUFU
AP3M1	1.35419e-12	-2.49713	1	1	2.15031e-08	AP3M1
LAMA5-AS1	1.37603e-12	-2.20293	0.759	0.5	2.18499e-08	LAMA5-AS1
ZNF550	1.40757e-12	-2.87721	1	1	2.23508e-08	ZNF550
ADRM1	1.41252e-12	0.986549	1	1	2.24294e-08	ADRM1
PHF19	1.41571e-12	1.35154	1	1	2.24801e-08	PHF19
TLCD1	1.47129e-12	-0.209129	1	0.75	2.33627e-08	TLCD1
GIGYF1	1.47147e-12	-2.68968	1	1	2.33655e-08	GIGYF1
ABCF3	1.51378e-12	-2.69172	1	1	2.40373e-08	ABCF3
WDR82	1.52671e-12	-0.121335	1	1	2.42426e-08	WDR82
CSNK2A2	1.59097e-12	-2.40814	1	1	2.52631e-08	CSNK2A2
STXBP4	1.59555e-12	-2.63753	1	1	2.53357e-08	STXBP4
UBOX5	1.59866e-12	-3.02054	1	1	2.53851e-08	UBOX5
CCDC59	1.62148e-12	0.679058	1	1	2.57475e-08	CCDC59
KTN1	1.63359e-12	1.94201	1	1	2.59398e-08	KTN1
LINC00324	1.63881e-12	-1.61841	0.966	1	2.60226e-08	LINC00324
VAMP5	1.64314e-12	2.12392	1	1	2.60915e-08	VAMP5
KLC4	1.64591e-12	-2.69158	1	1	2.61354e-08	KLC4
ZCCHC2	1.65215e-12	-2.72057	1	1	2.62346e-08	ZCCHC2
MVB12A	1.6634e-12	0.677669	1	1	2.64131e-08	MVB12A
ARHGEF37	1.66768e-12	-1.79578	1	1	2.64812e-08	ARHGEF37
ARID3B	1.77203e-12	-3.35894	0.966	1	2.8138e-08	ARID3B
DCAF17	1.81499e-12	-2.3825	1	1	2.88202e-08	DCAF17
SND1-IT1	1.86158e-12	-0.990808	1	1	2.956e-08	SND1-IT1
RPS6KB1	1.91678e-12	-2.28949	1	1	3.04365e-08	RPS6KB1
RPUSD1	1.91866e-12	-0.297425	1	1	3.04664e-08	RPUSD1
COX10	1.92236e-12	-2.90168	1	1	3.05252e-08	COX10
ZNF426	1.92933e-12	-2.57056	1	1	3.06359e-08	ZNF426
TRMT44	1.93233e-12	-2.58984	1	1	3.06835e-08	TRMT44
MREG	1.95785e-12	-0.421249	1	1	3.10887e-08	MREG
TTLL3	1.98512e-12	-3.24563	1	1	3.15217e-08	TTLL3
PPP6R1	2.00044e-12	0.1062	1	1	3.1765e-08	PPP6R1
DEF8	2.00115e-12	0.461191	1	1	3.17763e-08	DEF8
SNRPB	2.02891e-12	1.39215	1	1	3.2217e-08	SNRPB
FAM13A	2.08202e-12	-3.63102	1	1	3.30605e-08	FAM13A
LCLAT1	2.09789e-12	-2.61894	1	1	3.33124e-08	LCLAT1
BCL6	2.10346e-12	-3.48777	1	1	3.34009e-08	BCL6
UBE2C	2.14382e-12	1.72084	1	1	3.40417e-08	UBE2C
USP54	2.25584e-12	-3.80556	1	1	3.58204e-08	USP54
DZANK1	2.29033e-12	-2.87579	0.966	1	3.63682e-08	DZANK1
ZBTB3	2.30736e-12	-2.86578	1	1	3.66386e-08	ZBTB3
DUSP18	2.3253e-12	-2.61654	1	1	3.69234e-08	DUSP18
CLN6	2.34105e-12	-0.320617	1	1	3.71735e-08	CLN6
LSM6	2.3414e-12	1.1913	1	1	3.71791e-08	LSM6
WDR3	2.35312e-12	-2.39028	1	1	3.73652e-08	WDR3
C2orf42	2.36941e-12	-2.50381	1	1	3.76239e-08	C2orf42
CNOT10	2.40753e-12	-2.22005	1	1	3.82291e-08	CNOT10
LDB1	2.4863e-12	-3.83584	1	1	3.94799e-08	LDB1
ZNF503	2.51697e-12	0.0658847	1	1	3.9967e-08	ZNF503
AC004556.1	2.51852e-12	-1.21249	0.276	0	3.99916e-08	AC004556.1
C6orf62	2.52799e-12	-3.14447	1	1	4.0142e-08	C6orf62
ARPC2	2.65342e-12	0.907675	1	1	4.21337e-08	ARPC2
NLRP1	2.70555e-12	1.70185	0.966	1	4.29615e-08	NLRP1
VPS41	2.7338e-12	-2.31364	1	1	4.341e-08	VPS41
MCM9	2.76236e-12	-2.69748	1	1	4.38634e-08	MCM9
TMA16	2.77892e-12	0.73826	1	1	4.41265e-08	TMA16
OCIAD1	2.83133e-12	0.660022	1	1	4.49587e-08	OCIAD1
KIF27	2.83718e-12	-2.97447	1	1	4.50516e-08	KIF27
TFIP11	2.84028e-12	-2.70772	1	1	4.51008e-08	TFIP11
ZNF14	2.95903e-12	-3.22807	1	1	4.69865e-08	ZNF14
TMEM101	3.02717e-12	-0.390187	1	1	4.80685e-08	TMEM101
KANK2	3.08342e-12	0.676922	1	1	4.89616e-08	KANK2
SMN1	3.12513e-12	-3.45565	0.966	1	4.96239e-08	SMN1
HOXC11	3.14463e-12	-1.77438	0.621	0	4.99335e-08	HOXC11
SETDB1	3.16641e-12	-2.50928	1	1	5.02795e-08	SETDB1
RNF181	3.20976e-12	1.15944	1	1	5.09678e-08	RNF181
RRP36	3.23664e-12	0.392349	1	1	5.13946e-08	RRP36
ZNF205	3.26554e-12	-0.95097	1	1	5.18534e-08	ZNF205
TCEA2	3.31187e-12	0.658923	1	1	5.25892e-08	TCEA2
SMIM3	3.39653e-12	1.32998	1	1	5.39335e-08	SMIM3
LINC01358	3.45953e-12	-1.9581	0.862	0.5	5.49338e-08	LINC01358
NKRF	3.48015e-12	-2.65893	1	1	5.52613e-08	NKRF
HOXA13	3.48409e-12	-2.02296	0.655	0	5.53238e-08	HOXA13
GTSE1	3.56578e-12	0.648773	1	1	5.66211e-08	GTSE1
NUP214	3.6382e-12	-2.8649	1	1	5.7771e-08	NUP214
VCPKMT	3.70122e-12	-2.75056	1	1	5.87716e-08	VCPKMT
GIT2	3.70656e-12	-2.34035	1	1	5.88565e-08	GIT2
DIS3L2	3.71243e-12	-2.90321	1	1	5.89497e-08	DIS3L2
EXOC4	3.78877e-12	-2.55062	1	1	6.01619e-08	EXOC4
B4GALT2	3.80065e-12	0.164652	1	1	6.03505e-08	B4GALT2
GDF15	3.84126e-12	1.06626	1	0.75	6.09954e-08	GDF15
NOTCH2	3.86214e-12	-3.26201	1	1	6.13269e-08	NOTCH2
CBWD3	3.89283e-12	-2.98856	1	1	6.18142e-08	CBWD3
TMEM165	3.99054e-12	0.448798	1	1	6.33659e-08	TMEM165
OXSM	4.10434e-12	-0.988322	1	1	6.51727e-08	OXSM
TYW3	4.17063e-12	0.257446	1	1	6.62254e-08	TYW3
LINC01023	4.23007e-12	-0.915451	1	1	6.71693e-08	LINC01023
MFF	4.25601e-12	0.386783	1	1	6.75812e-08	MFF
AC016549.1	4.2703e-12	-1.40143	1	1	6.78081e-08	AC016549.1
KANSL1	4.31645e-12	-2.76934	1	1	6.85408e-08	KANSL1
CCDC189	4.34522e-12	-0.842916	1	1	6.89978e-08	CCDC189
MAGOHB	4.34938e-12	0.508716	1	1	6.90639e-08	MAGOHB
ZNF483	4.35196e-12	-4.43391	0.724	1	6.91047e-08	ZNF483
HNRNPH1	4.44973e-12	-4.05995	1	1	7.06572e-08	HNRNPH1
TMEM64	4.7125e-12	-0.413608	1	1	7.48298e-08	TMEM64
S100A16	4.7609e-12	2.95307	1	1	7.55984e-08	S100A16
MBD5	4.76736e-12	-3.0841	1	1	7.57009e-08	MBD5
TSPAN10	5.00461e-12	-1.74334	1	1	7.94681e-08	TSPAN10
SP140L	5.02566e-12	-1.21127	0.931	1	7.98025e-08	SP140L
PPP1CC	5.11993e-12	0.214837	1	1	8.12994e-08	PPP1CC
PCYT1B	5.12198e-12	-3.64318	1	1	8.13319e-08	PCYT1B
PSMG1	5.23838e-12	0.647728	1	1	8.31803e-08	PSMG1
PSMD8	5.43752e-12	1.181	1	1	8.63424e-08	PSMD8
MPST	5.87413e-12	0.926586	1	1	9.32753e-08	MPST
LINC01431	5.9046e-12	-2.04406	0.931	1	9.37592e-08	LINC01431
ZNF8	5.94572e-12	-3.08705	1	1	9.4412e-08	ZNF8
ENY2	5.94972e-12	1.25902	1	1	9.44757e-08	ENY2
ZYG11B	5.99337e-12	-2.36994	1	1	9.51687e-08	ZYG11B
KDM5B	6.04215e-12	-3.18616	1	1	9.59432e-08	KDM5B
HAGHL	6.04318e-12	0.525138	1	1	9.59597e-08	HAGHL
NTPCR	6.08919e-12	0.179585	1	1	9.66902e-08	NTPCR
KLHL25	6.1995e-12	-3.26015	1	1	9.84419e-08	KLHL25
VEZT	6.2259e-12	-2.10725	1	1	9.88611e-08	VEZT
ATG10	6.3692e-12	-0.565504	1	1	1.01136e-07	ATG10
ORMDL2	6.41076e-12	0.207102	1	1	1.01796e-07	ORMDL2
FEZ2	6.49202e-12	0.924855	1	1	1.03087e-07	FEZ2
ZMYM6	6.49267e-12	-2.48812	1	1	1.03097e-07	ZMYM6
SLC38A7	6.5051e-12	-2.72066	1	1	1.03295e-07	SLC38A7
PDCD7	6.52618e-12	0.310209	1	1	1.03629e-07	PDCD7
LMBR1	6.72524e-12	-2.09947	1	1	1.0679e-07	LMBR1
RRAGC	6.88114e-12	-0.0298164	1	1	1.09266e-07	RRAGC
OCEL1	7.0855e-12	-0.177832	1	1	1.12511e-07	OCEL1
POLR3G	7.12056e-12	-0.58402	1	1	1.13067e-07	POLR3G
BEND6	7.25959e-12	-0.57803	1	1	1.15275e-07	BEND6
FUNDC1	7.26912e-12	0.515519	1	1	1.15426e-07	FUNDC1
SNU13	7.29274e-12	1.57127	1	1	1.15801e-07	SNU13
USP21	7.35438e-12	-2.86276	1	1	1.1678e-07	USP21
ZBTB41	7.464e-12	-2.70479	1	1	1.18521e-07	ZBTB41
PELI1	7.66283e-12	-3.57429	1	1	1.21678e-07	PELI1
PTPN12	7.66843e-12	0.496906	1	1	1.21767e-07	PTPN12
CUL2	7.69379e-12	-2.77399	1	1	1.2217e-07	CUL2
AARS2	7.86749e-12	-3.25192	1	1	1.24928e-07	AARS2
JUN	7.97516e-12	-3.50402	1	1	1.26638e-07	JUN
PPP2R1B	8.03318e-12	-2.87555	1	1	1.27559e-07	PPP2R1B
FNBP4	8.07082e-12	-1.94384	1	1	1.28157e-07	FNBP4
DCAF16	8.07732e-12	-2.76455	1	1	1.2826e-07	DCAF16
PCIF1	8.11179e-12	-2.27138	1	1	1.28807e-07	PCIF1
UBE2D2	8.4258e-12	0.823977	1	1	1.33793e-07	UBE2D2
SPG11	8.493e-12	-2.67466	1	1	1.3486e-07	SPG11
ZNF34	8.50559e-12	-2.84148	1	1	1.3506e-07	ZNF34
PITRM1	8.70035e-12	-2.78238	1	1	1.38153e-07	PITRM1
CREB1	8.76151e-12	-1.98751	1	1	1.39124e-07	CREB1
PDCL3	9.02646e-12	0.260179	1	1	1.43331e-07	PDCL3
MIER3	9.04025e-12	-2.9056	1	1	1.4355e-07	MIER3
NPC2	9.29477e-12	2.28388	1	1	1.47592e-07	NPC2
ZBED3	9.31164e-12	-0.575654	1	1	1.4786e-07	ZBED3
HOXD13	9.4069e-12	-1.3501	0.621	0	1.49372e-07	HOXD13
ZNF581	9.43095e-12	-0.229073	1	1	1.49754e-07	ZNF581
PJA1	9.55722e-12	-2.84819	1	1	1.51759e-07	PJA1
FAM214A	9.71914e-12	-3.03879	1	1	1.5433e-07	FAM214A
SF3B3	9.84662e-12	-2.25192	1	1	1.56354e-07	SF3B3
SLX4IP	9.86566e-12	-3.00742	1	1	1.56657e-07	SLX4IP
HERC3	9.99293e-12	-2.98511	1	1	1.58678e-07	HERC3
CCNT1	1.00599e-11	-2.26555	1	1	1.59741e-07	CCNT1
MED29	1.03982e-11	-2.36511	1	1	1.65113e-07	MED29
USP30	1.0433e-11	-2.74311	1	1	1.65665e-07	USP30
BSDC1	1.04979e-11	-2.23256	1	1	1.66697e-07	BSDC1
SEC31A	1.08407e-11	-2.43369	1	1	1.72139e-07	SEC31A
FAM104B	1.10498e-11	0.298834	1	1	1.75461e-07	FAM104B
TUSC2	1.1561e-11	0.504402	1	1	1.83577e-07	TUSC2
COG1	1.17639e-11	-2.4857	1	1	1.868e-07	COG1
HBS1L	1.20744e-11	-2.40616	1	1	1.9173e-07	HBS1L
SHPK	1.20909e-11	-3.01086	1	1	1.91992e-07	SHPK
TACC2	1.24896e-11	-3.65683	1	1	1.98323e-07	TACC2
GLG1	1.27336e-11	-2.49537	1	1	2.02197e-07	GLG1
RGL1	1.29251e-11	-3.48726	1	1	2.05238e-07	RGL1
DHRS4L2	1.29932e-11	0.346572	1	1	2.0632e-07	DHRS4L2
ZBTB40	1.30523e-11	-2.91574	1	1	2.07257e-07	ZBTB40
GTF2A2	1.3092e-11	1.02571	1	1	2.07889e-07	GTF2A2
C18orf54	1.30944e-11	-3.22818	1	1	2.07925e-07	C18orf54
ABHD4	1.32721e-11	-2.9506	1	1	2.10748e-07	ABHD4
ZNF17	1.32912e-11	-2.9195	1	1	2.11051e-07	ZNF17
NIPBL	1.33102e-11	-1.97619	1	1	2.11353e-07	NIPBL
CHCHD4	1.33502e-11	-0.271368	1	1	2.11988e-07	CHCHD4
CFAP44	1.3658e-11	-2.95668	1	1	2.16875e-07	CFAP44
YIF1A	1.37852e-11	0.909021	1	1	2.18894e-07	YIF1A
IER2	1.389e-11	-4.05524	1	1	2.2056e-07	IER2
LZTS2	1.38931e-11	-0.349572	1	1	2.20609e-07	LZTS2
COX6A1	1.44763e-11	1.52425	1	1	2.29869e-07	COX6A1
FASTKD2	1.44775e-11	-2.61157	1	1	2.29889e-07	FASTKD2
C7orf50	1.4579e-11	1.31463	1	1	2.31499e-07	C7orf50
AC005253.2	1.45829e-11	-2.39346	0.828	0.75	2.31563e-07	AC005253.2
PHKG1	1.46196e-11	-0.43638	1	1	2.32145e-07	PHKG1
WWC3	1.47257e-11	-0.455668	1	1	2.3383e-07	WWC3
BAZ2B	1.48996e-11	-2.9059	1	1	2.3659e-07	BAZ2B
RAP1A	1.5399e-11	0.731456	1	1	2.44521e-07	RAP1A
EIF5B	1.54618e-11	1.47059	1	1	2.45518e-07	EIF5B
UFC1	1.57798e-11	0.646751	1	1	2.50567e-07	UFC1
MRPL24	1.60017e-11	0.57235	1	1	2.54091e-07	MRPL24
NUBP1	1.60037e-11	-0.124036	1	1	2.54123e-07	NUBP1
PPME1	1.61465e-11	-2.11026	1	1	2.56391e-07	PPME1
FRMD8	1.63494e-11	0.00586419	1	1	2.59612e-07	FRMD8
FRG1	1.64073e-11	0.5178	1	1	2.60532e-07	FRG1
SHPRH	1.64536e-11	-2.41261	1	1	2.61266e-07	SHPRH
MFSD12	1.64614e-11	0.124222	1	0.75	2.6139e-07	MFSD12
USP4	1.67632e-11	-2.44671	1	1	2.66183e-07	USP4
RELL1	1.68848e-11	-4.28137	0.966	1	2.68113e-07	RELL1
SNRNP25	1.72729e-11	0.960775	1	1	2.74276e-07	SNRNP25
TPRKB	1.76205e-11	1.01482	1	1	2.79796e-07	TPRKB
NTMT1	1.81682e-11	0.850608	1	1	2.88492e-07	NTMT1
TGS1	1.83557e-11	-0.154921	1	1	2.9147e-07	TGS1
ARL2	1.8412e-11	0.659892	1	1	2.92364e-07	ARL2
TOR1AIP1	1.84379e-11	-2.09283	1	1	2.92776e-07	TOR1AIP1
ZNF587B	1.86365e-11	-3.05954	1	1	2.95929e-07	ZNF587B
MIEF1	1.87715e-11	-2.1503	1	1	2.98072e-07	MIEF1
C1orf43	1.89743e-11	0.688824	1	1	3.01293e-07	C1orf43
GCN1	1.9063e-11	-2.92582	1	1	3.02701e-07	GCN1
CBX3	1.91537e-11	1.92486	1	1	3.04141e-07	CBX3
MRPL48	1.95179e-11	0.234667	1	1	3.09924e-07	MRPL48
CD81	1.96734e-11	1.3972	1	1	3.12393e-07	CD81
LINC00174	1.96959e-11	-4.24167	0.828	1	3.12751e-07	LINC00174
NME1	1.97785e-11	1.57437	1	1	3.14063e-07	NME1
SNX24	1.98311e-11	-0.179278	1	1	3.14898e-07	SNX24
ZSCAN9	1.99619e-11	-2.72572	1	1	3.16975e-07	ZSCAN9
PRKCI	2.0052e-11	-2.34585	1	1	3.18406e-07	PRKCI
MYO18A	2.01144e-11	-3.53996	1	1	3.19396e-07	MYO18A
BCOR	2.02375e-11	-3.62348	1	1	3.21351e-07	BCOR
TARS2	2.02718e-11	-2.45294	1	1	3.21896e-07	TARS2
ATL1	2.05337e-11	-3.23849	1	1	3.26055e-07	ATL1
MBD2	2.07348e-11	-0.0447858	1	1	3.29247e-07	MBD2
OTUD3	2.12365e-11	-2.6665	1	1	3.37214e-07	OTUD3
NBL1	2.13095e-11	0.539652	1	1	3.38374e-07	NBL1
PPA2	2.15837e-11	0.40837	1	1	3.42727e-07	PPA2
RNF187	2.16484e-11	1.45415	1	1	3.43754e-07	RNF187
PANK2	2.24436e-11	-0.179612	1	1	3.56382e-07	PANK2
STARD9	2.24541e-11	-3.31147	1	1	3.56548e-07	STARD9
GTF2IRD2B	2.2693e-11	-3.15867	1	1	3.60343e-07	GTF2IRD2B
DNAJB4	2.28862e-11	-3.1514	1	1	3.63411e-07	DNAJB4
HES1	2.36284e-11	2.26772	1	1	3.75195e-07	HES1
COTL1	2.45202e-11	2.10073	1	1	3.89356e-07	COTL1
PSMG2	2.45925e-11	0.442087	1	1	3.90504e-07	PSMG2
LRFN4	2.49015e-11	-0.78174	1	1	3.95411e-07	LRFN4
DENND4C	2.55499e-11	-3.15569	1	1	4.05706e-07	DENND4C
SAT2	2.55639e-11	1.27682	1	1	4.05929e-07	SAT2
CDK11B	2.57867e-11	-0.0951569	1	1	4.09466e-07	CDK11B
RB1CC1	2.59517e-11	-2.14789	1	1	4.12087e-07	RB1CC1
E4F1	2.60615e-11	-2.10571	1	1	4.1383e-07	E4F1
DNAJC19	2.61901e-11	1.00679	1	1	4.15872e-07	DNAJC19
MED13L	2.677e-11	-2.48934	1	1	4.25082e-07	MED13L
MRTO4	2.67796e-11	0.203659	1	1	4.25233e-07	MRTO4
MLLT10	2.68589e-11	-2.50823	1	1	4.26493e-07	MLLT10
PIN1	2.73976e-11	0.791192	1	1	4.35047e-07	PIN1
A1BG	2.75941e-11	0.978792	1	1	4.38166e-07	A1BG
PSMB3	2.76069e-11	1.30297	1	1	4.38371e-07	PSMB3
HNRNPAB	2.80752e-11	1.1183	1	1	4.45806e-07	HNRNPAB
PYGO1	2.8428e-11	-2.77714	1	1	4.51408e-07	PYGO1
RBM27	2.88595e-11	-1.97902	1	1	4.5826e-07	RBM27
ANAPC10	2.92517e-11	-0.226537	1	1	4.64488e-07	ANAPC10
GPATCH8	2.92679e-11	-2.80817	1	1	4.64745e-07	GPATCH8
BCYRN1	2.97862e-11	1.1959	1	1	4.72975e-07	BCYRN1
HIF1AN	3.02421e-11	-2.59539	1	1	4.80214e-07	HIF1AN
DDX3X	3.04082e-11	-2.25432	1	1	4.82851e-07	DDX3X
TRIM28	3.0442e-11	0.309834	1	1	4.83389e-07	TRIM28
CHP1	3.05462e-11	-2.94793	1	1	4.85043e-07	CHP1
PTGES2	3.13723e-11	0.12587	1	1	4.98161e-07	PTGES2
MED16	3.18286e-11	-2.56369	1	1	5.05407e-07	MED16
C3orf62	3.21669e-11	-1.06847	1	1	5.10779e-07	C3orf62
WIPF1	3.32251e-11	0.237075	1	1	5.27582e-07	WIPF1
CHPT1	3.34304e-11	1.34441	1	1	5.30842e-07	CHPT1
INPP4A	3.35166e-11	-2.4111	1	1	5.32211e-07	INPP4A
WDR6	3.39923e-11	-2.28993	1	1	5.39763e-07	WDR6
RPAP1	3.42632e-11	-2.79532	1	1	5.44065e-07	RPAP1
RPUSD4	3.43064e-11	-2.29215	1	1	5.44752e-07	RPUSD4
MGST3	3.59353e-11	1.23768	1	1	5.70617e-07	MGST3
RFX3	3.59741e-11	-3.09134	1	1	5.71233e-07	RFX3
VEZF1	3.62062e-11	-2.32112	1	1	5.74917e-07	VEZF1
CCDC82	3.64695e-11	-2.04279	1	1	5.79099e-07	CCDC82
ZNF589	3.71046e-11	-2.89635	1	1	5.89183e-07	ZNF589
ZNF711	3.71171e-11	-4.81091	0.931	1	5.89382e-07	ZNF711
HCN3	3.72241e-11	-3.58042	0.931	1	5.91082e-07	HCN3
KDM6B	3.7914e-11	-3.34085	1	1	6.02037e-07	KDM6B
ERC1	3.83861e-11	-2.34604	1	1	6.09532e-07	ERC1
ZFX	3.84115e-11	-2.95589	1	1	6.09937e-07	ZFX
NPIPB5	3.87251e-11	-3.26594	0.966	1	6.14916e-07	NPIPB5
RBPMS	3.8949e-11	0.292567	1	1	6.18472e-07	RBPMS
NISCH	3.91541e-11	-2.51615	1	1	6.21728e-07	NISCH
RAF1	3.95121e-11	-1.9348	1	1	6.27413e-07	RAF1
UGGT2	3.95922e-11	-2.64884	1	1	6.28684e-07	UGGT2
RFX7	4.08297e-11	-3.07662	1	1	6.48335e-07	RFX7
ZNF473	4.14559e-11	-2.98323	1	1	6.58278e-07	ZNF473
ZNF805	4.1596e-11	-4.57898	0.724	1	6.60503e-07	ZNF805
ITSN1	4.17147e-11	-2.38062	1	1	6.62389e-07	ITSN1
TCTEX1D2	4.25079e-11	0.928509	1	1	6.74983e-07	TCTEX1D2
RUFY2	4.25813e-11	-2.7816	1	1	6.76149e-07	RUFY2
KLF12	4.40191e-11	-3.43043	1	1	6.9898e-07	KLF12
MLH1	4.61242e-11	-2.17161	1	1	7.32407e-07	MLH1
KDM3B	4.62698e-11	-2.23681	1	1	7.34719e-07	KDM3B
PPM1G	4.66857e-11	0.711206	1	1	7.41321e-07	PPM1G
TRPM7	4.78757e-11	-3.04755	1	1	7.60219e-07	TRPM7
DESI2	4.86391e-11	0.0718212	1	1	7.7234e-07	DESI2
DCLRE1C	4.87422e-11	-2.64544	1	1	7.73977e-07	DCLRE1C
PARP16	4.87743e-11	-2.78329	1	1	7.74488e-07	PARP16
AL132709.8	4.9079e-11	-1.76035	0.759	0.5	7.79326e-07	AL132709.8
PDE12	4.93221e-11	-2.17106	1	1	7.83186e-07	PDE12
ZNF223	4.94677e-11	-3.11251	0.966	1	7.85498e-07	ZNF223
SPAST	4.95506e-11	-2.40599	1	1	7.86814e-07	SPAST
FTL	5.06586e-11	2.648	1	1	8.04409e-07	FTL
GPATCH3	5.07853e-11	-2.46818	1	1	8.06421e-07	GPATCH3
MZT1	5.11853e-11	0.99979	1	1	8.12771e-07	MZT1
CMTR1	5.1192e-11	-2.7305	1	1	8.12877e-07	CMTR1
SRPX	5.16958e-11	1.78736	1	1	8.20878e-07	SRPX
SLC9A6	5.17188e-11	-2.64775	1	1	8.21243e-07	SLC9A6
ECE2	5.21556e-11	-0.881051	1	0.75	8.28178e-07	ECE2
POU2F1	5.28829e-11	-2.86308	1	1	8.39728e-07	POU2F1
ROM1	5.29769e-11	-0.404673	1	1	8.4122e-07	ROM1
ZNF507	5.33013e-11	-2.46569	1	1	8.46372e-07	ZNF507
CYCS	5.35447e-11	1.15943	1	1	8.50236e-07	CYCS
BOLA1	5.37543e-11	-0.15898	1	1	8.53565e-07	BOLA1
U2AF1	5.43231e-11	-2.36599	1	1	8.62596e-07	U2AF1
KANSL3	5.46217e-11	-2.70609	1	1	8.67337e-07	KANSL3
LIG3	5.47189e-11	-2.30889	1	1	8.68882e-07	LIG3
CAPZA1	5.51713e-11	-2.99839	1	1	8.76066e-07	CAPZA1
DCTPP1	5.69862e-11	0.844956	1	1	9.04885e-07	DCTPP1
BMPR2	5.77144e-11	-2.43824	1	1	9.16447e-07	BMPR2
DAD1	5.82086e-11	1.18073	1	1	9.24295e-07	DAD1
TEX10	5.82653e-11	-2.66506	1	1	9.25195e-07	TEX10
STEAP3	5.8695e-11	-0.591116	1	0.75	9.32018e-07	STEAP3
TBX2	5.89884e-11	-0.3473	1	0.75	9.36676e-07	TBX2
HOXC-AS1	5.9589e-11	-1.94827	0.586	0	9.46213e-07	HOXC-AS1
PPM1N	5.9958e-11	-1.91009	1	1	9.52073e-07	PPM1N
PER1	6.27057e-11	-4.18569	1	1	9.95703e-07	PER1
SOX21	6.27876e-11	0.213965	0.966	1	9.97004e-07	SOX21
VAX2	6.32848e-11	-0.782853	1	1	1.0049e-06	VAX2
LRIG2	6.36459e-11	-2.87593	1	1	1.01063e-06	LRIG2
ETV7	6.38092e-11	-2.09383	0.724	0.5	1.01323e-06	ETV7
METRNL	6.38201e-11	-0.830214	1	1	1.0134e-06	METRNL
SRBD1	6.56393e-11	-2.67417	1	1	1.04229e-06	SRBD1
AZIN1	6.79287e-11	-2.42975	1	1	1.07864e-06	AZIN1
CARD19	6.93749e-11	0.800165	1	1	1.1016e-06	CARD19
PANO1	7.00652e-11	-1.99395	1	1	1.11257e-06	PANO1
CYC1	7.03521e-11	0.895785	1	1	1.11712e-06	CYC1
BCL3	7.08078e-11	-0.412554	1	1	1.12436e-06	BCL3
GSTM2	7.15463e-11	-4.44085	0.793	1	1.13608e-06	GSTM2
ARID1B	7.29888e-11	-2.38442	1	1	1.15899e-06	ARID1B
SRP14-AS1	7.62177e-11	-1.22387	1	1	1.21026e-06	SRP14-AS1
TIMM23B	8.00544e-11	-2.77861	1	1	1.27118e-06	TIMM23B
ATL2	8.02487e-11	-2.44721	1	1	1.27427e-06	ATL2
SNRPD3	8.06928e-11	0.988361	1	1	1.28132e-06	SNRPD3
LRRC37A3	8.22867e-11	-3.39579	1	1	1.30663e-06	LRRC37A3
ARHGAP33	8.29787e-11	-4.3628	1	1	1.31762e-06	ARHGAP33
CINP	8.30391e-11	0.0873016	1	1	1.31858e-06	CINP
ZNF337	8.32924e-11	-2.7639	1	1	1.3226e-06	ZNF337
USF3	8.35302e-11	-2.68476	1	1	1.32638e-06	USF3
TTC21B	8.38017e-11	-3.03207	1	1	1.33069e-06	TTC21B
MSH2	8.386e-11	-2.55528	1	1	1.33161e-06	MSH2
MTF2	8.58529e-11	-2.28204	1	1	1.36326e-06	MTF2
ZNF134	8.66238e-11	-2.67879	1	1	1.3755e-06	ZNF134
OAZ3	8.70376e-11	-1.8509	1	0.75	1.38207e-06	OAZ3
YTHDC2	8.82399e-11	-2.29634	1	1	1.40116e-06	YTHDC2
MRPL15	8.93636e-11	0.169897	1	1	1.419e-06	MRPL15
HARS2	9.20406e-11	-2.361	1	1	1.46151e-06	HARS2
RPN1	9.36633e-11	-2.26509	1	1	1.48728e-06	RPN1
YTHDF1	9.37401e-11	-0.342795	1	1	1.4885e-06	YTHDF1
WDR36	9.43525e-11	-2.40988	1	1	1.49822e-06	WDR36
SRGAP2	9.44471e-11	-2.89157	1	1	1.49973e-06	SRGAP2
SAMD1	9.60339e-11	0.0280865	1	1	1.52492e-06	SAMD1
INPP5B	9.60989e-11	-2.75738	1	1	1.52595e-06	INPP5B
SPINK2	9.67344e-11	-2.64366	0.207	0	1.53604e-06	SPINK2
SMIM20	9.82171e-11	0.894257	1	1	1.55959e-06	SMIM20
AC009961.3	9.86904e-11	-2.2756	0.862	0.5	1.5671e-06	AC009961.3
TMSB4X	9.90362e-11	3.27777	1	1	1.5726e-06	TMSB4X
RANGRF	1.02768e-10	0.657924	1	1	1.63186e-06	RANGRF
SDE2	1.04237e-10	-2.41974	1	1	1.65518e-06	SDE2
GRHPR	1.06436e-10	0.758443	1	1	1.6901e-06	GRHPR
HECA	1.06468e-10	-2.8937	1	1	1.6906e-06	HECA
[truncated: 13,855 more rows]

## Sheet: Table_S2
Bulk TCGA RNAseq differential expression with GTEx normal tissue
Primary GBM versus Recurrent GBM								Primary GBM versus GTEx normal tissue								Primary GBM versus TCGA normal Tissue								Recurrent GBM versus GTEx normal Tissue								Recurrent GBM versus TCGA normal tissue
	baseMean	log2FoldChange	lfcSE	stat	pvalue	padj			baseMean	log2FoldChange	lfcSE	stat	pvalue	padj			baseMean	log2FoldChange	lfcSE	stat	pvalue	padj			baseMean	log2FoldChange	lfcSE	stat	pvalue	padj			baseMean	log2FoldChange	lfcSE	stat	pvalue	padj
ENSG00000000003	616.253	0.253994	0.263595	0.963577	0.335258	0.500693		ENSG00000000003	616.253	2.34217	0.0533079	43.9367	0	0		ENSG00000000003	616.253	2.34217	0.0533079	43.9367	0	0		ENSG00000000003	616.253	0.253994	0.263595	0.963577	0.335258	0.500693		ENSG00000000003	616.253	0.253994	0.263595	0.963577	0.335258	0.500693
ENSG00000000005	7.31406	-2.11093	0.498551	-4.23413	2.29e-05	0.00019694		ENSG00000000005	7.31406	3.23519	0.0996867	32.4536	4.81596e-231	2.04028e-230		ENSG00000000005	7.31406	3.23519	0.0996867	32.4536	4.81596e-231	2.04028e-230		ENSG00000000005	7.31406	-2.11093	0.498551	-4.23413	2.29435e-05	0.000196938		ENSG00000000005	7.31406	-2.11093	0.498551	-4.23413	2.29435e-05	0.000196938
ENSG00000000419	497.83	0.420453	0.0894247	4.70175	2.58e-06	3.14e-05		ENSG00000000419	497.83	0.473578	0.0181309	26.1199	2.16526e-150	7.01744e-150		ENSG00000000419	497.83	0.473578	0.0181309	26.1199	2.16526e-150	7.01744e-150		ENSG00000000419	497.83	0.420453	0.0894247	4.70175	2.57937e-06	3.13705e-05		ENSG00000000419	497.83	0.420453	0.0894247	4.70175	2.57937e-06	3.13705e-05
ENSG00000000457	361.172	-0.406793	0.115498	-3.52208	0.00042817	0.00233896		ENSG00000000457	361.172	0.215384	0.0232763	9.25339	2.17475e-20	3.73784e-20		ENSG00000000457	361.172	0.215384	0.0232763	9.25339	2.17475e-20	3.73784e-20		ENSG00000000457	361.172	-0.406793	0.115498	-3.52208	0.000428171	0.00233896		ENSG00000000457	361.172	-0.406793	0.115498	-3.52208	0.000428171	0.00233896
ENSG00000000460	216.584	-0.382827	0.160315	-2.38797	0.0169415	0.0493024		ENSG00000000460	216.584	0.50066	0.0323516	15.4756	5.07078e-54	1.09061e-53		ENSG00000000460	216.584	0.50066	0.0323516	15.4756	5.07078e-54	1.09061e-53		ENSG00000000460	216.584	-0.382827	0.160315	-2.38797	0.0169415	0.0493025		ENSG00000000460	216.584	-0.382827	0.160315	-2.38797	0.0169415	0.0493025
ENSG00000000938	330.675	0.311621	0.28822	1.08119	0.279612	0.437851		ENSG00000000938	330.675	0.213578	0.0582882	3.66416	0.000248148	0.000344728		ENSG00000000938	330.675	0.213578	0.0582882	3.66416	0.000248148	0.000344728		ENSG00000000938	330.675	0.311621	0.28822	1.08119	0.279612	0.437851		ENSG00000000938	330.675	0.311621	0.28822	1.08119	0.279612	0.437851
ENSG00000000971	856.841	0.306838	0.332847	0.921857	0.356603	0.523834		ENSG00000000971	856.841	0.791653	0.0672987	11.7633	6.03447e-32	1.13414e-31		ENSG00000000971	856.841	0.791653	0.0672987	11.7633	6.03447e-32	1.13414e-31		ENSG00000000971	856.841	0.306838	0.332847	0.921857	0.356603	0.523834		ENSG00000000971	856.841	0.306838	0.332847	0.921857	0.356603	0.523834
ENSG00000001036	586.058	0.453532	0.174175	2.60389	0.0092173	0.0300965		ENSG00000001036	586.058	0.98191	0.0352376	27.8654	7.01103e-171	2.44339e-170		ENSG00000001036	586.058	0.98191	0.0352376	27.8654	7.01103e-171	2.44339e-170		ENSG00000001036	586.058	0.453532	0.174175	2.60389	0.0092173	0.0300965		ENSG00000001036	586.058	0.453532	0.174175	2.60389	0.0092173	0.0300965
ENSG00000001084	1133.07	0.131381	0.153264	0.85722	0.391323	0.560427		ENSG00000001084	1133.07	-0.09483	0.0309882	-3.06019	0.00221195	0.00299537		ENSG00000001084	1133.07	-0.09483	0.0309882	-3.06019	0.00221195	0.00299537		ENSG00000001084	1133.07	0.131381	0.153264	0.85722	0.391323	0.560427		ENSG00000001084	1133.07	0.131381	0.153264	0.85722	0.391323	0.560427
ENSG00000001167	698.351	-0.0041119	0.117506	-0.034993	0.972085	1		ENSG00000001167	698.351	-0.0787872	0.0237498	-3.31738	0.000908656	0.00124389		ENSG00000001167	698.351	-0.0787872	0.0237498	-3.31738	0.000908656	0.00124389		ENSG00000001167	698.351	-0.00411189	0.117506	-0.034993	0.972085	1		ENSG00000001167	698.351	-0.00411189	0.117506	-0.034993	0.972085	1
ENSG00000001460	462.716	0.610775	0.165956	3.68034	0.00023292	0.00140459		ENSG00000001460	462.716	-1.57974	0.0336225	-46.9848	0	0		ENSG00000001460	462.716	-1.57974	0.0336225	-46.9848	0	0		ENSG00000001460	462.716	0.610775	0.165956	3.68034	0.000232924	0.00140459		ENSG00000001460	462.716	0.610775	0.165956	3.68034	0.000232924	0.00140459
ENSG00000001461	3914.6	0.368158	0.197852	1.86077	0.0627761	0.140145		ENSG00000001461	3914.6	-1.64313	0.0400024	-41.0759	0	0		ENSG00000001461	3914.6	-1.64313	0.0400024	-41.0759	0	0		ENSG00000001461	3914.6	0.368158	0.197852	1.86077	0.0627761	0.140145		ENSG00000001461	3914.6	0.368158	0.197852	1.86077	0.0627761	0.140145
ENSG00000001497	2458.78	0.0468326	0.167971	0.278813	0.780388	0.898892		ENSG00000001497	2458.78	-1.16946	0.0339532	-34.4434	5.65278e-260	2.60552e-259		ENSG00000001497	2458.78	-1.16946	0.0339532	-34.4434	5.65278e-260	2.60552e-259		ENSG00000001497	2458.78	0.0468326	0.167971	0.278813	0.780388	0.898892		ENSG00000001497	2458.78	0.0468326	0.167971	0.278813	0.780388	0.898892
ENSG00000001561	1064.58	0.327031	0.226329	1.44494	0.148476	0.271345		ENSG00000001561	1064.58	-0.751757	0.0457637	-16.4269	1.2274e-60	2.7356e-60		ENSG00000001561	1064.58	-0.751757	0.0457637	-16.4269	1.2274e-60	2.7356e-60		ENSG00000001561	1064.58	0.327031	0.226329	1.44494	0.148476	0.271345		ENSG00000001561	1064.58	0.327031	0.226329	1.44494	0.148476	0.271345
ENSG00000001617	348.227	0.522495	0.292124	1.78861	0.073678	0.158732		ENSG00000001617	348.227	0.107813	0.0590868	1.82465	0.0680533	0.0869336		ENSG00000001617	348.227	0.107813	0.0590868	1.82465	0.0680533	0.0869336		ENSG00000001617	348.227	0.522495	0.292124	1.78861	0.073678	0.158732		ENSG00000001617	348.227	0.522495	0.292124	1.78861	0.073678	0.158732
ENSG00000001626	82.3083	-0.893847	0.320183	-2.79167	0.0052436	0.0188437		ENSG00000001626	82.3083	-0.718033	0.0641184	-11.1986	4.14436e-29	7.62775e-29		ENSG00000001626	82.3083	-0.718033	0.0641184	-11.1986	4.14436e-29	7.62775e-29		ENSG00000001626	82.3083	-0.893847	0.320183	-2.79167	0.0052436	0.0188437		ENSG00000001626	82.3083	-0.893847	0.320183	-2.79167	0.0052436	0.0188437
ENSG00000001629	2129.7	-0.513413	0.148881	-3.44849	0.00056373	0.00295046		ENSG00000001629	2129.7	1.36086	0.0300966	45.2165	0	0		ENSG00000001629	2129.7	1.36086	0.0300966	45.2165	0	0		ENSG00000001629	2129.7	-0.513414	0.148881	-3.44849	0.00056373	0.00295046		ENSG00000001629	2129.7	-0.513414	0.148881	-3.44849	0.00056373	0.00295046
ENSG00000001630	1491.66	-1.23393	0.194647	-6.33932	2.31e-10	1.02e-08		ENSG00000001630	1491.66	-2.73923	0.0390109	-70.217	0	0		ENSG00000001630	1491.66	-2.73923	0.0390109	-70.217	0	0		ENSG00000001630	1491.66	-1.23393	0.194647	-6.33932	2.30785e-10	1.02277e-08		ENSG00000001630	1491.66	-1.23393	0.194647	-6.33932	2.30785e-10	1.02277e-08
ENSG00000001631	809.406	-0.196424	0.106156	-1.85033	0.0642659	0.142655		ENSG00000001631	809.406	-1.84346	0.0213328	-86.4144	0	0		ENSG00000001631	809.406	-1.84346	0.0213328	-86.4144	0	0		ENSG00000001631	809.406	-0.196424	0.106156	-1.85033	0.0642659	0.142655		ENSG00000001631	809.406	-0.196424	0.106156	-1.85033	0.0642659	0.142655
ENSG00000002016	448.674	-0.4778	0.167519	-2.85221	0.00434161	0.0161109		ENSG00000002016	448.674	0.187657	0.0338168	5.54922	2.86942e-08	4.29923e-08		ENSG00000002016	448.674	0.187657	0.0338168	5.54922	2.86942e-08	4.29923e-08		ENSG00000002016	448.674	-0.4778	0.167519	-2.85221	0.00434161	0.0161109		ENSG00000002016	448.674	-0.4778	0.167519	-2.85221	0.00434161	0.0161109
ENSG00000002079	7.51069	-2.49541	0.325457	-7.6674	1.76e-14	2.72e-12		ENSG00000002079	7.51069	2.69371	0.0617551	43.6193	0	0		ENSG00000002079	7.51069	2.69371	0.0617551	43.6193	0	0		ENSG00000002079	7.51069	-2.49541	0.325457	-7.6674	1.75524e-14	2.71961e-12		ENSG00000002079	7.51069	-2.49541	0.325457	-7.6674	1.75524e-14	2.71961e-12
ENSG00000002330	1579.36	-0.235512	0.160445	-1.46787	0.142141	0.2626		ENSG00000002330	1579.36	-1.71139	0.0323943	-52.83	0	0		ENSG00000002330	1579.36	-1.71139	0.0323943	-52.83	0	0		ENSG00000002330	1579.36	-0.235512	0.160445	-1.46787	0.142141	0.2626		ENSG00000002330	1579.36	-0.235512	0.160445	-1.46787	0.142141	0.2626
ENSG00000002549	1688.92	0.0614004	0.207365	0.296099	0.767155	0.888448		ENSG00000002549	1688.92	1.8167	0.0419282	43.3287	0	0		ENSG00000002549	1688.92	1.8167	0.0419282	43.3287	0	0		ENSG00000002549	1688.92	0.0614004	0.207365	0.296099	0.767155	0.888448		ENSG00000002549	1688.92	0.0614004	0.207365	0.296099	0.767155	0.888448
ENSG00000002586	3767.25	0.554604	0.279318	1.98557	0.0470816	0.111713		ENSG00000002586	3767.25	2.24158	0.0564727	39.6932	0	0		ENSG00000002586	3767.25	2.24158	0.0564727	39.6932	0	0		ENSG00000002586	3767.25	0.554604	0.279318	1.98557	0.0470816	0.111713		ENSG00000002586	3767.25	0.554604	0.279318	1.98557	0.0470816	0.111713
ENSG00000002587	427.758	0.100023	0.413642	0.241811	0.808926	0.918829		ENSG00000002587	427.758	0.348901	0.0836303	4.17195	3.02001e-05	4.28309e-05		ENSG00000002587	427.758	0.348901	0.0836303	4.17195	3.02001e-05	4.28309e-05		ENSG00000002587	427.758	0.100023	0.413642	0.241811	0.808926	0.918829		ENSG00000002587	427.758	0.100023	0.413642	0.241811	0.808926	0.918829
ENSG00000002726	2.88023	-1.04617	0.505094	-2.07123	0.0383369	0.0948059		ENSG00000002726	2.88023	3.89769	0.103817	37.5437	0	0		ENSG00000002726	2.88023	3.89769	0.103817	37.5437	0	0		ENSG00000002726	2.88023	-1.04617	0.505094	-2.07123	0.0383369	0.0948059		ENSG00000002726	2.88023	-1.04617	0.505094	-2.07123	0.0383369	0.0948059
ENSG00000002745	28.1499	-1.43716	0.406287	-3.53729	0.00040426	0.00223156		ENSG00000002745	28.1499	2.08782	0.0817973	25.5243	1.06015e-143	3.35869e-143		ENSG00000002745	28.1499	2.08782	0.0817973	25.5243	1.06015e-143	3.35869e-143		ENSG00000002745	28.1499	-1.43716	0.406287	-3.53729	0.000404256	0.00223156		ENSG00000002745	28.1499	-1.43716	0.406287	-3.53729	0.000404256	0.00223156
ENSG00000002746	558.216	-0.168107	0.356848	-0.471088	0.637578	0.789619		ENSG00000002746	558.216	-1.38763	0.0721087	-19.2436	1.59752e-82	3.95593e-82		ENSG00000002746	558.216	-1.38763	0.0721087	-19.2436	1.59752e-82	3.95593e-82		ENSG00000002746	558.216	-0.168107	0.356848	-0.471088	0.637578	0.789619		ENSG00000002746	558.216	-0.168107	0.356848	-0.471088	0.637578	0.789619
ENSG00000002822	524.961	-1.18665	0.177627	-6.68056	2.38e-11	1.35e-09		ENSG00000002822	524.961	-3.46544	0.0342217	-101.264	0	0		ENSG00000002822	524.961	-3.46544	0.0342217	-101.264	0	0		ENSG00000002822	524.961	-1.18665	0.177627	-6.68056	2.38025e-11	1.35119e-09		ENSG00000002822	524.961	-1.18665	0.177627	-6.68056	2.38025e-11	1.35119e-09
ENSG00000002834	3009.47	0.319905	0.118443	2.70091	0.00691505	0.0237295		ENSG00000002834	3009.47	0.380873	0.023951	15.9022	6.11839e-57	1.33794e-56		ENSG00000002834	3009.47	0.380873	0.023951	15.9022	6.11839e-57	1.33794e-56		ENSG00000002834	3009.47	0.319905	0.118443	2.70091	0.00691505	0.0237295		ENSG00000002834	3009.47	0.319905	0.118443	2.70091	0.00691505	0.0237295
ENSG00000002919	686.838	0.275983	0.0919563	3.00125	0.00268876	0.0107874		ENSG00000002919	686.838	0.586306	0.0186184	31.4906	1.16813e-217	4.73896e-217		ENSG00000002919	686.838	0.586306	0.0186184	31.4906	1.16813e-217	4.73896e-217		ENSG00000002919	686.838	0.275983	0.0919562	3.00125	0.00268876	0.0107874		ENSG00000002919	686.838	0.275983	0.0919562	3.00125	0.00268876	0.0107874
ENSG00000002933	673.282	0.513166	0.318561	1.61089	0.107204	0.211902		ENSG00000002933	673.282	1.3828	0.0644163	21.4666	3.19829e-102	8.60667e-102		ENSG00000002933	673.282	1.3828	0.0644163	21.4666	3.19829e-102	8.60667e-102		ENSG00000002933	673.282	0.513166	0.318561	1.61089	0.107204	0.211902		ENSG00000002933	673.282	0.513166	0.318561	1.61089	0.107204	0.211902
ENSG00000003056	1313.06	-0.0056898	0.0844124	-0.0674046	0.94626	1		ENSG00000003056	1313.06	0.657281	0.0170702	38.5047	0	0		ENSG00000003056	1313.06	0.657281	0.0170702	38.5047	0	0		ENSG00000003056	1313.06	-0.00568979	0.0844124	-0.0674046	0.94626	1		ENSG00000003056	1313.06	-0.00568979	0.0844124	-0.0674046	0.94626	1
ENSG00000003096	386.663	-0.188516	0.308953	-0.610178	0.541744	0.705378		ENSG00000003096	386.663	1.20713	0.0624642	19.3251	3.30208e-83	8.20134e-83		ENSG00000003096	386.663	1.20713	0.0624642	19.3251	3.30208e-83	8.20134e-83		ENSG00000003096	386.663	-0.188516	0.308953	-0.610178	0.541744	0.705378		ENSG00000003096	386.663	-0.188516	0.308953	-0.610178	0.541744	0.705378
ENSG00000003137	715.914	0.810131	0.448511	1.80627	0.0708768	0.154122		ENSG00000003137	715.914	-2.4184	0.0907152	-26.6593	1.39614e-156	4.62371e-156		ENSG00000003137	715.914	-2.4184	0.0907152	-26.6593	1.39614e-156	4.62371e-156		ENSG00000003137	715.914	0.810131	0.448511	1.80627	0.0708768	0.154122		ENSG00000003137	715.914	0.810131	0.448511	1.80627	0.0708768	0.154122
ENSG00000003147	792.264	-0.463585	0.232691	-1.99228	0.0463405	0.110361		ENSG00000003147	792.264	-1.34759	0.0469715	-28.6895	5.15515e-181	1.85773e-180		ENSG00000003147	792.264	-1.34759	0.0469715	-28.6895	5.15515e-181	1.85773e-180		ENSG00000003147	792.264	-0.463585	0.232691	-1.99228	0.0463405	0.110361		ENSG00000003147	792.264	-0.463585	0.232691	-1.99228	0.0463405	0.110361
ENSG00000003249	1728.87	0.304424	0.231684	1.31396	0.188859	0.326444		ENSG00000003249	1728.87	-1.17849	0.0468427	-25.1584	1.14433e-139	3.56848e-139		ENSG00000003249	1728.87	-1.17849	0.0468427	-25.1584	1.14433e-139	3.56848e-139		ENSG00000003249	1728.87	0.304424	0.231684	1.31396	0.188859	0.326444		ENSG00000003249	1728.87	0.304424	0.231684	1.31396	0.188859	0.326444
ENSG00000003393	2517.77	-0.363187	0.365318	-0.994165	0.320143	0.483994		ENSG00000003393	2517.77	-0.930111	0.073848	-12.5949	2.25119e-36	4.3566e-36		ENSG00000003393	2517.77	-0.930111	0.073848	-12.5949	2.25119e-36	4.3566e-36		ENSG00000003393	2517.77	-0.363187	0.365318	-0.994164	0.320143	0.483994		ENSG00000003393	2517.77	-0.363187	0.365318	-0.994164	0.320143	0.483994
ENSG00000003400	215.253	-0.168124	0.236029	-0.712302	0.476277	0.644287		ENSG00000003400	215.253	0.616291	0.0477096	12.9176	3.58325e-38	7.01271e-38		ENSG00000003400	215.253	0.616291	0.0477096	12.9176	3.58325e-38	7.01271e-38		ENSG00000003400	215.253	-0.168124	0.236029	-0.712303	0.476277	0.644287		ENSG00000003400	215.253	-0.168124	0.236029	-0.712303	0.476277	0.644287
ENSG00000003402	3146.42	-0.185396	0.233663	-0.793432	0.427526	0.596792		ENSG00000003402	3146.42	-0.501269	0.0472352	-10.6122	2.61584e-26	4.7168e-26		ENSG00000003402	3146.42	-0.501269	0.0472352	-10.6122	2.61584e-26	4.7168e-26		ENSG00000003402	3146.42	-0.185396	0.233663	-0.793432	0.427526	0.596792		ENSG00000003402	3146.42	-0.185396	0.233663	-0.793432	0.427526	0.596792
ENSG00000003436	228.368	-0.152944	0.292716	-0.522499	0.601323	0.758298		ENSG00000003436	228.368	3.13654	0.0592233	52.9612	0	0		ENSG00000003436	228.368	3.13654	0.0592233	52.9612	0	0		ENSG00000003436	228.368	-0.152944	0.292716	-0.522499	0.601323	0.758298		ENSG00000003436	228.368	-0.152944	0.292716	-0.522499	0.601323	0.758298
ENSG00000003509	417.485	-0.215291	0.0758956	-2.83668	0.00455857	0.0167551		ENSG00000003509	417.485	-0.138002	0.0152648	-9.04057	1.55852e-19	2.65873e-19		ENSG00000003509	417.485	-0.138002	0.0152648	-9.04057	1.55852e-19	2.65873e-19		ENSG00000003509	417.485	-0.215291	0.0758956	-2.83668	0.00455857	0.0167551		ENSG00000003509	417.485	-0.215291	0.0758956	-2.83668	0.00455857	0.0167551
ENSG00000003756	4567.71	-0.418679	0.136578	-3.06549	0.00217315	0.00903532		ENSG00000003756	4567.71	-0.932381	0.027598	-33.7844	3.33867e-250	1.49297e-249		ENSG00000003756	4567.71	-0.932381	0.027598	-33.7844	3.33867e-250	1.49297e-249		ENSG00000003756	4567.71	-0.418679	0.136578	-3.06549	0.00217315	0.00903532		ENSG00000003756	4567.71	-0.418679	0.136578	-3.06549	0.00217315	0.00903532
ENSG00000003987	538.837	-0.15647	0.206018	-0.759494	0.447557	0.616536		ENSG00000003987	538.837	-2.18115	0.0415344	-52.5142	0	0		ENSG00000003987	538.837	-2.18115	0.0415344	-52.5142	0	0		ENSG00000003987	538.837	-0.156469	0.206018	-0.759494	0.447557	0.616536		ENSG00000003987	538.837	-0.156469	0.206018	-0.759494	0.447557	0.616536
ENSG00000003989	537.792	-0.383292	0.318518	-1.20336	0.228838	0.377366		ENSG00000003989	537.792	0.593629	0.0643843	9.22008	2.96874e-20	5.09641e-20		ENSG00000003989	537.792	0.593629	0.0643843	9.22008	2.96874e-20	5.09641e-20		ENSG00000003989	537.792	-0.383292	0.318518	-1.20336	0.228838	0.377366		ENSG00000003989	537.792	-0.383292	0.318518	-1.20336	0.228838	0.377366
ENSG00000004059	3353.25	0.135667	0.131384	1.0326	0.301793	0.463167		ENSG00000004059	3353.25	-0.272451	0.0265626	-10.2569	1.10154e-24	1.96174e-24		ENSG00000004059	3353.25	-0.272451	0.0265626	-10.2569	1.10154e-24	1.96174e-24		ENSG00000004059	3353.25	0.135667	0.131384	1.0326	0.301793	0.463167		ENSG00000004059	3353.25	0.135667	0.131384	1.0326	0.301793	0.463167
ENSG00000004139	1586.2	-0.270756	0.12406	-2.18246	0.0290756	0.0761381		ENSG00000004139	1586.2	-1.95721	0.0250086	-78.2615	0	0		ENSG00000004139	1586.2	-1.95721	0.0250086	-78.2615	0	0		ENSG00000004139	1586.2	-0.270756	0.12406	-2.18246	0.0290756	0.0761381		ENSG00000004139	1586.2	-0.270756	0.12406	-2.18246	0.0290756	0.0761381
ENSG00000004142	2275.88	0.131399	0.0850351	1.54523	0.12229	0.234167		ENSG00000004142	2275.88	0.507169	0.0171969	29.4918	3.66649e-191	1.36895e-190		ENSG00000004142	2275.88	0.507169	0.0171969	29.4918	3.66649e-191	1.36895e-190		ENSG00000004142	2275.88	0.131399	0.0850351	1.54523	0.12229	0.234167		ENSG00000004142	2275.88	0.131399	0.0850351	1.54523	0.12229	0.234167
ENSG00000004399	2150.71	0.587616	0.260753	2.25354	0.0242254	0.0657559		ENSG00000004399	2150.71	1.22882	0.0527216	23.3077	3.70714e-120	1.07391e-119		ENSG00000004399	2150.71	1.22882	0.0527216	23.3077	3.70714e-120	1.07391e-119		ENSG00000004399	2150.71	0.587616	0.260753	2.25354	0.0242254	0.0657559		ENSG00000004399	2150.71	0.587616	0.260753	2.25354	0.0242254	0.0657559
ENSG00000004455	1658.79	0.0273749	0.124481	0.219912	0.82594	0.931286		ENSG00000004455	1658.79	1.53535	0.0251737	60.9902	0	0		ENSG00000004455	1658.79	1.53535	0.0251737	60.9902	0	0		ENSG00000004455	1658.79	0.0273749	0.124481	0.219912	0.82594	0.931286		ENSG00000004455	1658.79	0.0273749	0.124481	0.219912	0.82594	0.931286
ENSG00000004468	401.127	-0.377713	0.378806	-0.997112	0.31871	0.482416		ENSG00000004468	401.127	0.988133	0.0765774	12.9037	4.28954e-38	8.39269e-38		ENSG00000004468	401.127	0.988133	0.0765774	12.9037	4.28954e-38	8.39269e-38		ENSG00000004468	401.127	-0.377712	0.378806	-0.997112	0.31871	0.482416		ENSG00000004468	401.127	-0.377712	0.378806	-0.997112	0.31871	0.482416
ENSG00000004478	3943.82	-0.19562	0.225158	-0.868811	0.384951	0.553609		ENSG00000004478	3943.82	-0.999388	0.0455142	-21.9577	7.30467e-107	2.00537e-106		ENSG00000004478	3943.82	-0.999388	0.0455142	-21.9577	7.30467e-107	2.00537e-106		ENSG00000004478	3943.82	-0.19562	0.225158	-0.868811	0.384951	0.553609		ENSG00000004478	3943.82	-0.19562	0.225158	-0.868811	0.384951	0.553609
ENSG00000004487	1783.02	-0.276823	0.112014	-2.47132	0.0134615	0.0410215		ENSG00000004487	1783.02	1.18125	0.0226456	52.1624	0	0		ENSG00000004487	1783.02	1.18125	0.0226456	52.1624	0	0		ENSG00000004487	1783.02	-0.276822	0.112014	-2.47132	0.0134615	0.0410215		ENSG00000004487	1783.02	-0.276822	0.112014	-2.47132	0.0134615	0.0410215
ENSG00000004534	3930.61	-0.392461	0.149981	-2.61674	0.00887746	0.0291858		ENSG00000004534	3930.61	-0.824622	0.0303087	-27.2074	5.30931e-163	1.80124e-162		ENSG00000004534	3930.61	-0.824622	0.0303087	-27.2074	5.30931e-163	1.80124e-162		ENSG00000004534	3930.61	-0.392461	0.149981	-2.61674	0.00887746	0.0291858		ENSG00000004534	3930.61	-0.392461	0.149981	-2.61674	0.00887746	0.0291858
ENSG00000004660	2514.92	0.646831	0.310524	2.08303	0.0372484	0.0927389		ENSG00000004660	2514.92	-2.61939	0.0627918	-41.7155	0	0		ENSG00000004660	2514.92	-2.61939	0.0627918	-41.7155	0	0		ENSG00000004660	2514.92	0.646831	0.310524	2.08303	0.0372484	0.0927389		ENSG00000004660	2514.92	0.646831	0.310524	2.08303	0.0372484	0.0927389
ENSG00000004700	580.288	-0.233778	0.121683	-1.92121	0.0547058	0.1258		ENSG00000004700	580.288	0.573247	0.024588	23.3141	3.1878e-120	9.2365e-120		ENSG00000004700	580.288	0.573247	0.024588	23.3141	3.1878e-120	9.2365e-120		ENSG00000004700	580.288	-0.233778	0.121683	-1.92121	0.0547058	0.1258		ENSG00000004700	580.288	-0.233778	0.121683	-1.92121	0.0547058	0.1258
ENSG00000004766	873.319	-0.289968	0.127722	-2.2703	0.0231892	0.0634004		ENSG00000004766	873.319	0.435877	0.0258076	16.8895	5.37749e-64	1.21987e-63		ENSG00000004766	873.319	0.435877	0.0258076	16.8895	5.37749e-64	1.21987e-63		ENSG00000004766	873.319	-0.289968	0.127722	-2.2703	0.0231892	0.0634004		ENSG00000004766	873.319	-0.289968	0.127722	-2.2703	0.0231892	0.0634004
ENSG00000004776	1129.28	0.932266	0.320616	2.90773	0.00364058	0.0139095		ENSG00000004776	1129.28	-2.415	0.0648605	-37.2338	1.93909e-303	1.00414e-302		ENSG00000004776	1129.28	-2.415	0.0648605	-37.2338	1.93909e-303	1.00414e-302		ENSG00000004776	1129.28	0.932266	0.320616	2.90773	0.00364058	0.0139095		ENSG00000004776	1129.28	0.932266	0.320616	2.90773	0.00364058	0.0139095
ENSG00000004777	2559.58	0.149896	0.165883	0.90362	0.366197	0.533954		ENSG00000004777	2559.58	-1.48965	0.0335332	-44.4232	0	0		ENSG00000004777	2559.58	-1.48965	0.0335332	-44.4232	0	0		ENSG00000004777	2559.58	0.149896	0.165883	0.90362	0.366197	0.533954		ENSG00000004777	2559.58	0.149896	0.165883	0.90362	0.366197	0.533954
ENSG00000004779	1343.63	0.144968	0.13351	1.08582	0.277557	0.435529		ENSG00000004779	1343.63	0.195145	0.0269964	7.22855	4.88173e-13	7.77979e-13		ENSG00000004779	1343.63	0.195145	0.0269964	7.22855	4.88173e-13	7.77979e-13		ENSG00000004779	1343.63	0.144968	0.13351	1.08582	0.277557	0.435529		ENSG00000004779	1343.63	0.144968	0.13351	1.08582	0.277557	0.435529
ENSG00000004799	1974.01	-0.149333	0.359474	-0.41542	0.677834	0.822842		ENSG00000004799	1974.01	-1.04114	0.0726681	-14.3274	1.4754e-46	3.04045e-46		ENSG00000004799	1974.01	-1.04114	0.0726681	-14.3274	1.4754e-46	3.04045e-46		ENSG00000004799	1974.01	-0.149333	0.359474	-0.41542	0.677834	0.822842		ENSG00000004799	1974.01	-0.149333	0.359474	-0.41542	0.677834	0.822842
ENSG00000004809	3.06064	0.904047	0.41715	2.1672	0.0302196	0.0785278		ENSG00000004809	3.06064	1.04733	0.0870953	12.0251	2.62206e-33	4.96915e-33		ENSG00000004809	3.06064	1.04733	0.0870953	12.0251	2.62206e-33	4.96915e-33		ENSG00000004809	3.06064	0.904047	0.41715	2.1672	0.0302196	0.0785278		ENSG00000004809	3.06064	0.904047	0.41715	2.1672	0.0302196	0.0785278
ENSG00000004838	260.606	-0.334123	0.377413	-0.885299	0.375996	0.544202		ENSG00000004838	260.606	0.307021	0.0762791	4.02497	5.69827e-05	8.03307e-05		ENSG00000004838	260.606	0.307021	0.0762791	4.02497	5.69827e-05	8.03307e-05		ENSG00000004838	260.606	-0.334123	0.377413	-0.885299	0.375996	0.544202		ENSG00000004838	260.606	-0.334123	0.377413	-0.885299	0.375996	0.544202
ENSG00000004846	1.55014	-1.90649	0.669184	-2.84898	0.00438596	0.0162427		ENSG00000004846	1.55014	4.30883	0.135448	31.8117	4.46177e-222	1.83564e-221		ENSG00000004846	1.55014	4.30883	0.135448	31.8117	4.46177e-222	1.83564e-221		ENSG00000004846	1.55014	-1.90649	0.669184	-2.84898	0.00438596	0.0162427		ENSG00000004846	1.55014	-1.90649	0.669184	-2.84898	0.00438596	0.0162427
ENSG00000004848	260.126	0.88461	0.584963	1.51225	0.13047	0.246086		ENSG00000004848	260.126	-0.967362	0.118305	-8.17681	2.91451e-16	4.8161e-16		ENSG00000004848	260.126	-0.967362	0.118305	-8.17681	2.91451e-16	4.8161e-16		ENSG00000004848	260.126	0.884611	0.584963	1.51225	0.13047	0.246086		ENSG00000004848	260.126	0.884611	0.584963	1.51225	0.13047	0.246086
ENSG00000004864	478.021	-0.268067	0.223237	-1.20082	0.229822	0.378618		ENSG00000004864	478.021	1.47195	0.0451358	32.6117	2.80261e-233	1.19446e-232		ENSG00000004864	478.021	1.47195	0.0451358	32.6117	2.80261e-233	1.19446e-232		ENSG00000004864	478.021	-0.268067	0.223237	-1.20082	0.229822	0.378618		ENSG00000004864	478.021	-0.268067	0.223237	-1.20082	0.229822	0.378618
ENSG00000004866	707.686	0.110323	0.161639	0.68253	0.494904	0.662061		ENSG00000004866	707.686	0.146047	0.0326837	4.46849	7.87741e-06	1.1299e-05		ENSG00000004866	707.686	0.146047	0.0326837	4.46849	7.87741e-06	1.1299e-05		ENSG00000004866	707.686	0.110323	0.161639	0.68253	0.494904	0.662061		ENSG00000004866	707.686	0.110323	0.161639	0.68253	0.494904	0.662061
ENSG00000004897	1257.56	-0.014884	0.0884134	-0.168345	0.866312	0.958774		ENSG00000004897	1257.56	0.5711	0.0178777	31.9448	6.37199e-224	2.63532e-223		ENSG00000004897	1257.56	0.5711	0.0178777	31.9448	6.37199e-224	2.63532e-223		ENSG00000004897	1257.56	-0.014884	0.0884134	-0.168345	0.866312	0.958774		ENSG00000004897	1257.56	-0.014884	0.0884134	-0.168345	0.866312	0.958774
ENSG00000004939	28.9135	0.379296	0.455799	0.832156	0.405321	0.574333		ENSG00000004939	28.9135	-0.855594	0.0923035	-9.26935	1.8728e-20	3.22128e-20		ENSG00000004939	28.9135	-0.855594	0.0923035	-9.26935	1.8728e-20	3.22128e-20		ENSG00000004939	28.9135	0.379296	0.455799	0.832156	0.405321	0.574333		ENSG00000004939	28.9135	0.379296	0.455799	0.832156	0.405321	0.574333
ENSG00000004948	28.5582	0.155325	0.793948	0.195636	0.844895	0.943913		ENSG00000004948	28.5582	-2.03086	0.160385	-12.6625	9.54667e-37	1.85289e-36		ENSG00000004948	28.5582	-2.03086	0.160385	-12.6625	9.54667e-37	1.85289e-36		ENSG00000004948	28.5582	0.155325	0.793948	0.195636	0.844895	0.943913		ENSG00000004948	28.5582	0.155325	0.793948	0.195636	0.844895	0.943913
ENSG00000004961	356.399	0.547577	0.128922	4.24737	2.16e-05	0.00018771		ENSG00000004961	356.399	0.488167	0.0261257	18.6853	6.51916e-78	1.58019e-77		ENSG00000004961	356.399	0.488167	0.0261257	18.6853	6.51916e-78	1.58019e-77		ENSG00000004961	356.399	0.547577	0.128922	4.24737	2.16299e-05	0.000187713		ENSG00000004961	356.399	0.547577	0.128922	4.24737	2.16299e-05	0.000187713
ENSG00000004975	969.64	-0.219237	0.152907	-1.4338	0.15163	0.275691		ENSG00000004975	969.64	0.537027	0.0309072	17.3755	1.26599e-67	2.9234e-67		ENSG00000004975	969.64	0.537027	0.0309072	17.3755	1.26599e-67	2.9234e-67		ENSG00000004975	969.64	-0.219237	0.152907	-1.4338	0.15163	0.275691		ENSG00000004975	969.64	-0.219237	0.152907	-1.4338	0.15163	0.275691
ENSG00000005001	17.5871	-0.480643	0.730359	-0.658091	0.51048	0.676977		ENSG00000005001	17.5871	-4.20322	0.139139	-30.2087	1.82214e-200	7.00935e-200		ENSG00000005001	17.5871	-4.20322	0.139139	-30.2087	1.82214e-200	7.00935e-200		ENSG00000005001	17.5871	-0.480643	0.730359	-0.658091	0.51048	0.676977		ENSG00000005001	17.5871	-0.480643	0.730359	-0.658091	0.51048	0.676977
ENSG00000005007	2910.1	-0.184321	0.141633	-1.3014	0.193122	0.332028		ENSG00000005007	2910.1	0.259874	0.028631	9.07665	1.11973e-19	1.9125e-19		ENSG00000005007	2910.1	0.259874	0.028631	9.07665	1.11973e-19	1.9125e-19		ENSG00000005007	2910.1	-0.184321	0.141633	-1.3014	0.193122	0.332028		ENSG00000005007	2910.1	-0.184321	0.141633	-1.3014	0.193122	0.332028
ENSG00000005020	686.971	0.198354	0.281367	0.704966	0.480832	0.648633		ENSG00000005020	686.971	1.23581	0.0568934	21.7216	1.28337e-104	3.48972e-104		ENSG00000005020	686.971	1.23581	0.0568934	21.7216	1.28337e-104	3.48972e-104		ENSG00000005020	686.971	0.198354	0.281367	0.704966	0.480832	0.648633		ENSG00000005020	686.971	0.198354	0.281367	0.704966	0.480832	0.648633
ENSG00000005022	3675.68	0.265217	0.129351	2.05036	0.0403291	0.0985979		ENSG00000005022	3675.68	0.50821	0.0261544	19.4311	4.2127e-84	1.05062e-83		ENSG00000005022	3675.68	0.50821	0.0261544	19.4311	4.2127e-84	1.05062e-83		ENSG00000005022	3675.68	0.265216	0.129351	2.05036	0.0403291	0.0985979		ENSG00000005022	3675.68	0.265216	0.129351	2.05036	0.0403291	0.0985979
ENSG00000005059	219.801	0.575438	0.343503	1.67521	0.0938936	0.191227		ENSG00000005059	219.801	3.10191	0.0694992	44.6324	0	0		ENSG00000005059	219.801	3.10191	0.0694992	44.6324	0	0		ENSG00000005059	219.801	0.575438	0.343503	1.67521	0.0938936	0.191228		ENSG00000005059	219.801	0.575438	0.343503	1.67521	0.0938936	0.191228
ENSG00000005073	5.88906	-0.0536049	0.569377	-0.0941466	0.924993	0.995817		ENSG00000005073	5.88906	6.15028	0.11977	51.3509	0	0		ENSG00000005073	5.88906	6.15028	0.11977	51.3509	0	0		ENSG00000005073	5.88906	-0.0536049	0.569377	-0.0941466	0.924993	0.995817		ENSG00000005073	5.88906	-0.0536049	0.569377	-0.0941466	0.924993	0.995817
ENSG00000005075	1300.13	0.127584	0.128425	0.993454	0.320489	0.484342		ENSG00000005075	1300.13	0.26446	0.0259685	10.1839	2.34052e-24	4.1587e-24		ENSG00000005075	1300.13	0.26446	0.0259685	10.1839	2.34052e-24	4.1587e-24		ENSG00000005075	1300.13	0.127584	0.128425	0.993454	0.320489	0.484342		ENSG00000005075	1300.13	0.127584	0.128425	0.993454	0.320489	0.484342
ENSG00000005100	663.759	-0.09448	0.102926	-0.917943	0.358649	0.526084		ENSG00000005100	663.759	0.567467	0.0208071	27.2727	8.9343e-164	3.03895e-163		ENSG00000005100	663.759	0.567467	0.0208071	27.2727	8.9343e-164	3.03895e-163		ENSG00000005100	663.759	-0.09448	0.102926	-0.917943	0.358649	0.526084		ENSG00000005100	663.759	-0.09448	0.102926	-0.917943	0.358649	0.526084
ENSG00000005102	4.45501	-0.939729	0.515401	-1.82329	0.0682588	0.14964		ENSG00000005102	4.45501	4.19168	0.105821	39.611	0	0		ENSG00000005102	4.45501	4.19168	0.105821	39.611	0	0		ENSG00000005102	4.45501	-0.939729	0.515401	-1.82329	0.0682587	0.14964		ENSG00000005102	4.45501	-0.939729	0.515401	-1.82329	0.0682587	0.14964
ENSG00000005108	418.2	-1.16023	0.222459	-5.2155	1.83e-07	3.29e-06		ENSG00000005108	418.2	2.10806	0.0449505	46.8974	0	0		ENSG00000005108	418.2	2.10806	0.0449505	46.8974	0	0		ENSG00000005108	418.2	-1.16023	0.222459	-5.2155	1.83321e-07	3.29074e-06		ENSG00000005108	418.2	-1.16023	0.222459	-5.2155	1.83321e-07	3.29074e-06
ENSG00000005156	1123.11	-0.603293	0.111861	-5.39325	6.92e-08	1.43e-06		ENSG00000005156	1123.11	0.124568	0.0225729	5.51846	3.41975e-08	5.11644e-08		ENSG00000005156	1123.11	0.124568	0.0225729	5.51846	3.41975e-08	5.11644e-08		ENSG00000005156	1123.11	-0.603293	0.111861	-5.39325	6.9194e-08	1.42967e-06		ENSG00000005156	1123.11	-0.603293	0.111861	-5.39325	6.9194e-08	1.42967e-06
ENSG00000005175	540.542	0.170582	0.10439	1.63408	0.102243	0.204206		ENSG00000005175	540.542	0.313823	0.0211236	14.8565	6.31006e-50	1.32591e-49		ENSG00000005175	540.542	0.313823	0.0211236	14.8565	6.31006e-50	1.32591e-49		ENSG00000005175	540.542	0.170582	0.10439	1.63408	0.102243	0.204206		ENSG00000005175	540.542	0.170582	0.10439	1.63408	0.102243	0.204206
ENSG00000005187	67.9227	-0.260271	0.167332	-1.55541	0.119848	0.230722		ENSG00000005187	67.9227	-1.70846	0.0327742	-52.1283	0	0		ENSG00000005187	67.9227	-1.70846	0.0327742	-52.1283	0	0		ENSG00000005187	67.9227	-0.260271	0.167332	-1.55541	0.119848	0.230722		ENSG00000005187	67.9227	-0.260271	0.167332	-1.55541	0.119848	0.230722
ENSG00000005189	109.753	-0.439827	0.197952	-2.22189	0.0262906	0.0702492		ENSG00000005189	109.753	1.33814	0.0399952	33.4575	2.00264e-245	8.82947e-245		ENSG00000005189	109.753	1.33814	0.0399952	33.4575	2.00264e-245	8.82947e-245		ENSG00000005189	109.753	-0.439827	0.197952	-2.22189	0.0262906	0.0702492		ENSG00000005189	109.753	-0.439827	0.197952	-2.22189	0.0262906	0.0702492
ENSG00000005194	896.807	-0.111441	0.105461	-1.0567	0.290648	0.450567		ENSG00000005194	896.807	1.11933	0.0213273	52.4834	0	0		ENSG00000005194	896.807	1.11933	0.0213273	52.4834	0	0		ENSG00000005194	896.807	-0.111441	0.105462	-1.0567	0.290648	0.450567		ENSG00000005194	896.807	-0.111441	0.105462	-1.0567	0.290648	0.450567
ENSG00000005206	2491.8	-0.225406	0.174273	-1.29341	0.195871	0.335692		ENSG00000005206	2491.8	-0.685393	0.0352226	-19.4589	2.45104e-84	6.11833e-84		ENSG00000005206	2491.8	-0.685393	0.0352226	-19.4589	2.45104e-84	6.11833e-84		ENSG00000005206	2491.8	-0.225406	0.174273	-1.29341	0.195871	0.335692		ENSG00000005206	2491.8	-0.225406	0.174273	-1.29341	0.195871	0.335692
ENSG00000005238	1134.92	0.38348	0.113521	3.37806	0.00072998	0.00365487		ENSG00000005238	1134.92	-0.311027	0.0229669	-13.5424	8.78799e-42	1.75984e-41		ENSG00000005238	1134.92	-0.311027	0.0229669	-13.5424	8.78799e-42	1.75984e-41		ENSG00000005238	1134.92	0.38348	0.113521	3.37806	0.000729979	0.00365487		ENSG00000005238	1134.92	0.38348	0.113521	3.37806	0.000729979	0.00365487
ENSG00000005243	249.573	0.752263	0.284114	2.64776	0.0081028	0.0270394		ENSG00000005243	249.573	1.5138	0.0574855	26.3336	7.91201e-153	2.58686e-152		ENSG00000005243	249.573	1.5138	0.0574855	26.3336	7.91201e-153	2.58686e-152		ENSG00000005243	249.573	0.752263	0.284114	2.64776	0.0081028	0.0270394		ENSG00000005243	249.573	0.752263	0.284114	2.64776	0.0081028	0.0270394
ENSG00000005249	1370.05	0.281806	0.244475	1.1527	0.249033	0.402059		ENSG00000005249	1370.05	-1.57452	0.0494274	-31.8551	1.11763e-222	4.60439e-222		ENSG00000005249	1370.05	-1.57452	0.0494274	-31.8551	1.11763e-222	4.60439e-222		ENSG00000005249	1370.05	0.281806	0.244475	1.1527	0.249033	0.402059		ENSG00000005249	1370.05	0.281806	0.244475	1.1527	0.249033	0.402059
ENSG00000005302	814.418	0.319227	0.0836621	3.81566	0.00013582	0.00088885		ENSG00000005302	814.418	0.0362387	0.0169396	2.13928	0.0324127	0.0420906		ENSG00000005302	814.418	0.0362387	0.0169396	2.13928	0.0324127	0.0420906		ENSG00000005302	814.418	0.319227	0.0836621	3.81566	0.000135817	0.000888852		ENSG00000005302	814.418	0.319227	0.0836621	3.81566	0.000135817	0.000888852
ENSG00000005339	2353.68	0.0182917	0.167616	0.109128	0.913101	0.988232		ENSG00000005339	2353.68	0.277597	0.0338874	8.19175	2.57456e-16	4.25729e-16		ENSG00000005339	2353.68	0.277597	0.0338874	8.19175	2.57456e-16	4.25729e-16		ENSG00000005339	2353.68	0.0182917	0.167616	0.109128	0.913101	0.988232		ENSG00000005339	2353.68	0.0182917	0.167616	0.109128	0.913101	0.988232
ENSG00000005379	5370.75	-0.445368	0.262765	-1.69493	0.0900884	0.185381		ENSG00000005379	5370.75	-2.64297	0.0530998	-49.7736	0	0		ENSG00000005379	5370.75	-2.64297	0.0530998	-49.7736	0	0		ENSG00000005379	5370.75	-0.445368	0.262765	-1.69493	0.0900884	0.185381		ENSG00000005379	5370.75	-0.445368	0.262765	-1.69493	0.0900884	0.185381
ENSG00000005381	57.7131	0.492972	0.252945	1.94893	0.0513039	0.119697		ENSG00000005381	57.7131	-1.93647	0.0514098	-37.6673	0	0		ENSG00000005381	57.7131	-1.93647	0.0514098	-37.6673	0	0		ENSG00000005381	57.7131	0.492972	0.252945	1.94893	0.0513039	0.119697		ENSG00000005381	57.7131	0.492972	0.252945	1.94893	0.0513039	0.119697
ENSG00000005421	26.2825	-2.28563	0.330242	-6.92108	4.48e-12	3.19e-10		ENSG00000005421	26.2825	-0.723668	0.0587205	-12.3239	6.73146e-35	1.28971e-34		ENSG00000005421	26.2825	-0.723668	0.0587205	-12.3239	6.73146e-35	1.28971e-34		ENSG00000005421	26.2825	-2.28563	0.330242	-6.92108	4.48227e-12	3.18979e-10		ENSG00000005421	26.2825	-2.28563	0.330242	-6.92108	4.48227e-12	3.18979e-10
ENSG00000005436	421.625	-0.0936601	0.0902577	-1.0377	0.299411	0.460523		ENSG00000005436	421.625	0.0575156	0.0182214	3.15649	0.00159682	0.00217186		ENSG00000005436	421.625	0.0575156	0.0182214	3.15649	0.00159682	0.00217186		ENSG00000005436	421.625	-0.0936601	0.0902577	-1.0377	0.299411	0.460523		ENSG00000005436	421.625	-0.0936601	0.0902577	-1.0377	0.299411	0.460523
ENSG00000005448	496.887	-0.208515	0.158926	-1.31202	0.189512	0.327286		ENSG00000005448	496.887	0.832904	0.0321265	25.9257	3.41477e-148	1.09753e-147		ENSG00000005448	496.887	0.832904	0.0321265	25.9257	3.41477e-148	1.09753e-147		ENSG00000005448	496.887	-0.208515	0.158926	-1.31202	0.189512	0.327286		ENSG00000005448	496.887	-0.208515	0.158926	-1.31202	0.189512	0.327286
ENSG00000005469	439.098	-0.029067	0.11594	-0.250706	0.802041	0.914119		ENSG00000005469	439.098	2.03405	0.0234755	86.6456	0	0		ENSG00000005469	439.098	2.03405	0.0234755	86.6456	0	0		ENSG00000005469	439.098	-0.029067	0.11594	-0.250706	0.802041	0.914119		ENSG00000005469	439.098	-0.029067	0.11594	-0.250706	0.802041	0.914119
ENSG00000005471	38.9388	-0.885482	0.257569	-3.43784	0.00058638	0.00305111		ENSG00000005471	38.9388	3.07641	0.0521844	58.9526	0	0		ENSG00000005471	38.9388	3.07641	0.0521844	58.9526	0	0		ENSG00000005471	38.9388	-0.885481	0.257569	-3.43784	0.000586382	0.00305111		ENSG00000005471	38.9388	-0.885481	0.257569	-3.43784	0.000586382	0.00305111
ENSG00000005483	2481.45	-0.0695121	0.13603	-0.511007	0.609347	0.765		ENSG00000005483	2481.45	0.0608806	0.0274989	2.21393	0.0268337	0.0349803		ENSG00000005483	2481.45	0.0608806	0.0274989	2.21393	0.0268337	0.0349803		ENSG00000005483	2481.45	-0.0695121	0.13603	-0.511006	0.609347	0.765		ENSG00000005483	2481.45	-0.0695121	0.13603	-0.511006	0.609347	0.765
ENSG00000005486	6027.27	1.37664	0.226736	6.07156	1.27e-09	4.47e-08		ENSG00000005486	6027.27	-0.320415	0.0458444	-6.98918	2.7649e-12	4.37123e-12		ENSG00000005486	6027.27	-0.320415	0.0458444	-6.98918	2.7649e-12	4.37123e-12		ENSG00000005486	6027.27	1.37664	0.226736	6.07156	1.26671e-09	4.47114e-08		ENSG00000005486	6027.27	1.37664	0.226736	6.07156	1.26671e-09	4.47114e-08
ENSG00000005513	3456.28	-0.418102	0.303018	-1.37979	0.16765	0.297836		ENSG00000005513	3456.28	0.562809	0.0612591	9.18736	4.02598e-20	6.9033e-20		ENSG00000005513	3456.28	0.562809	0.0612591	9.18736	4.02598e-20	6.9033e-20		ENSG00000005513	3456.28	-0.418102	0.303018	-1.37979	0.16765	0.297836		ENSG00000005513	3456.28	-0.418102	0.303018	-1.37979	0.16765	0.297836
ENSG00000005700	1267.97	-0.0516501	0.114816	-0.449852	0.652817	0.802647		ENSG00000005700	1267.97	0.299021	0.0232106	12.8829	5.61499e-38	1.09767e-37		ENSG00000005700	1267.97	0.299021	0.0232106	12.8829	5.61499e-38	1.09767e-37		ENSG00000005700	1267.97	-0.0516501	0.114816	-0.449852	0.652817	0.802647		ENSG00000005700	1267.97	-0.0516501	0.114816	-0.449852	0.652817	0.802647
ENSG00000005801	731.127	-0.241296	0.112741	-2.14027	0.0323332	0.0827269		ENSG00000005801	731.127	0.250599	0.0227728	11.0043	3.6432e-28	6.65925e-28		ENSG00000005801	731.127	0.250599	0.0227728	11.0043	3.6432e-28	6.65925e-28		ENSG00000005801	731.127	-0.241296	0.112741	-2.14027	0.0323332	0.0827269		ENSG00000005801	731.127	-0.241296	0.112741	-2.14027	0.0323332	0.0827269
ENSG00000005810	3403.56	-0.790148	0.201567	-3.92003	8.85e-05	0.00062463		ENSG00000005810	3403.56	-0.260529	0.0407363	-6.3955	1.60019e-10	2.47607e-10		ENSG00000005810	3403.56	-0.260529	0.0407363	-6.3955	1.60019e-10	2.47607e-10		ENSG00000005810	3403.56	-0.790148	0.201567	-3.92003	8.85378e-05	0.000624628		ENSG00000005810	3403.56	-0.790148	0.201567	-3.92003	8.85378e-05	0.000624628
ENSG00000005812	1504.89	0.294112	0.090837	3.2378	0.00120454	0.00555118		ENSG00000005812	1504.89	-0.545108	0.0183746	-29.6664	2.08541e-193	7.84493e-193		ENSG00000005812	1504.89	-0.545108	0.0183746	-29.6664	2.08541e-193	7.84493e-193		ENSG00000005812	1504.89	0.294112	0.090837	3.2378	0.00120454	0.00555118		ENSG00000005812	1504.89	0.294112	0.090837	3.2378	0.00120454	0.00555118
ENSG00000005844	149.324	0.362577	0.303558	1.19442	0.232312	0.381651		ENSG00000005844	149.324	1.51993	0.0614239	24.745	3.50759e-135	1.07552e-134		ENSG00000005844	149.324	1.51993	0.0614239	24.745	3.50759e-135	1.07552e-134		ENSG00000005844	149.324	0.362577	0.303558	1.19442	0.232312	0.381651		ENSG00000005844	149.324	0.362577	0.303558	1.19442	0.232312	0.381651
ENSG00000005882	3420.29	0.427012	0.19569	2.18208	0.0291033	0.0761754		ENSG00000005882	3420.29	-2.48451	0.0395684	-62.7903	0	0		ENSG00000005882	3420.29	-2.48451	0.0395684	-62.7903	0	0		ENSG00000005882	3420.29	0.427012	0.19569	2.18208	0.0291033	0.0761754		ENSG00000005882	3420.29	0.427012	0.19569	2.18208	0.0291033	0.0761754
ENSG00000005884	1331.55	0.58761	0.255138	2.30311	0.0212728	0.0591745		ENSG00000005884	1331.55	1.83681	0.0515901	35.6039	1.22066e-277	5.90114e-277		ENSG00000005884	1331.55	1.83681	0.0515901	35.6039	1.22066e-277	5.90114e-277		ENSG00000005884	1331.55	0.58761	0.255138	2.30311	0.0212728	0.0591745		ENSG00000005884	1331.55	0.58761	0.255138	2.30311	0.0212728	0.0591745
ENSG00000005889	754.039	-0.417841	0.14934	-2.79792	0.00514334	0.01855		ENSG00000005889	754.039	1.48275	0.0301906	49.1129	0	0		ENSG00000005889	754.039	1.48275	0.0301906	49.1129	0	0		ENSG00000005889	754.039	-0.417841	0.14934	-2.79792	0.00514334	0.01855		ENSG00000005889	754.039	-0.417841	0.14934	-2.79792	0.00514334	0.01855
ENSG00000005893	4931.62	0.653066	0.275527	2.37024	0.0177765	0.0512347		ENSG00000005893	4931.62	0.837442	0.0557056	15.0334	4.43973e-51	9.3951e-51		ENSG00000005893	4931.62	0.837442	0.0557056	15.0334	4.43973e-51	9.3951e-51		ENSG00000005893	4931.62	0.653066	0.275527	2.37024	0.0177765	0.0512347		ENSG00000005893	4931.62	0.653066	0.275527	2.37024	0.0177765	0.0512347
ENSG00000005961	136.905	-0.641188	0.30136	-2.12765	0.0333661	0.0849013		ENSG00000005961	136.905	-1.00771	0.0605908	-16.6314	4.13108e-62	9.27598e-62		ENSG00000005961	136.905	-1.00771	0.0605908	-16.6314	4.13108e-62	9.27598e-62		ENSG00000005961	136.905	-0.641188	0.30136	-2.12765	0.0333661	0.0849013		ENSG00000005961	136.905	-0.641188	0.30136	-2.12765	0.0333661	0.0849013
ENSG00000005981	94.3028	-0.273521	0.368854	-0.741543	0.458364	0.627023		ENSG00000005981	94.3028	-2.31428	0.0740268	-31.2627	1.50188e-214	6.04171e-214		ENSG00000005981	94.3028	-2.31428	0.0740268	-31.2627	1.50188e-214	6.04171e-214		ENSG00000005981	94.3028	-0.273521	0.368854	-0.741543	0.458364	0.627023		ENSG00000005981	94.3028	-0.273521	0.368854	-0.741543	0.458364	0.627023
ENSG00000006007	2340.26	0.0164829	0.135936	0.121254	0.90349	0.983071		ENSG00000006007	2340.26	-0.152376	0.0274808	-5.5448	2.94289e-08	4.40827e-08		ENSG00000006007	2340.26	-0.152376	0.0274808	-5.5448	2.94289e-08	4.40827e-08		ENSG00000006007	2340.26	0.0164829	0.135936	0.121254	0.90349	0.983071		ENSG00000006007	2340.26	0.0164829	0.135936	0.121254	0.90349	0.983071
ENSG00000006015	1601.66	-0.0437082	0.146689	-0.297965	0.76573	0.887545		ENSG00000006015	1601.66	-0.862543	0.0296446	-29.0961	4.01998e-186	1.47438e-185		ENSG00000006015	1601.66	-0.862543	0.0296446	-29.0961	4.01998e-186	1.47438e-185		ENSG00000006015	1601.66	-0.0437082	0.146689	-0.297965	0.76573	0.887545		ENSG00000006015	1601.66	-0.0437082	0.146689	-0.297965	0.76573	0.887545
ENSG00000006016	690.863	0.394598	0.397633	0.992366	0.321019	0.484972		ENSG00000006016	690.863	-1.71176	0.0803986	-21.2909	1.37777e-100	3.68275e-100		ENSG00000006016	690.863	-1.71176	0.0803986	-21.2909	1.37777e-100	3.68275e-100		ENSG00000006016	690.863	0.394598	0.397633	0.992366	0.321019	0.484972		ENSG00000006016	690.863	0.394598	0.397633	0.992366	0.321019	0.484972
ENSG00000006025	869.632	-0.423393	0.134668	-3.14398	0.00166669	0.00726779		ENSG00000006025	869.632	-0.686884	0.0271637	-25.2869	4.45629e-141	1.39747e-140		ENSG00000006025	869.632	-0.686884	0.0271637	-25.2869	4.45629e-141	1.39747e-140		ENSG00000006025	869.632	-0.423393	0.134668	-3.14398	0.00166669	0.00726779		ENSG00000006025	869.632	-0.423393	0.134668	-3.14398	0.00166669	0.00726779
ENSG00000006042	1095.86	0.242936	0.277296	0.876088	0.380982	0.549278		ENSG00000006042	1095.86	0.00570503	0.0560654	0.101757	0.91895	0.928947		ENSG00000006042	1095.86	0.00570503	0.0560654	0.101757	0.91895	0.928947		ENSG00000006042	1095.86	0.242936	0.277296	0.876088	0.380982	0.549278		ENSG00000006042	1095.86	0.242936	0.277296	0.876088	0.380982	0.549278
ENSG00000006047	48.3765	-0.630783	0.436163	-1.44621	0.148119	0.270873		ENSG00000006047	48.3765	-1.10556	0.0874835	-12.6374	1.31376e-36	2.54735e-36		ENSG00000006047	48.3765	-1.10556	0.0874835	-12.6374	1.31376e-36	2.54735e-36		ENSG00000006047	48.3765	-0.630783	0.436163	-1.44621	0.148119	0.270873		ENSG00000006047	48.3765	-0.630783	0.436163	-1.44621	0.148119	0.270873
ENSG00000006059	1.11711	0.842894	0.610084	1.3816	0.167094	0.2971		ENSG00000006059	1.11711	-0.304963	0.129425	-2.35629	0.0184586	0.0242282		ENSG00000006059	1.11711	-0.304963	0.129425	-2.35629	0.0184586	0.0242282		ENSG00000006059	1.11711	0.842894	0.610084	1.3816	0.167094	0.2971		ENSG00000006059	1.11711	0.842894	0.610084	1.3816	0.167094	0.2971
ENSG00000006062	556.089	0.00837686	0.170921	0.0490101	0.960911	1		ENSG00000006062	556.089	0.161404	0.0345546	4.671	2.99744e-06	4.33722e-06		ENSG00000006062	556.089	0.161404	0.0345546	4.671	2.99744e-06	4.33722e-06		ENSG00000006062	556.089	0.00837686	0.170921	0.0490101	0.960911	1		ENSG00000006062	556.089	0.00837686	0.170921	0.0490101	0.960911	1
ENSG00000006071	1933.61	-0.550247	0.346103	-1.58984	0.111872	0.218753		ENSG00000006071	1933.61	-3.01763	0.0698954	-43.1736	0	0		ENSG00000006071	1933.61	-3.01763	0.0698954	-43.1736	0	0		ENSG00000006071	1933.61	-0.550247	0.346103	-1.58984	0.111872	0.218753		ENSG00000006071	1933.61	-0.550247	0.346103	-1.58984	0.111872	0.218753
ENSG00000006116	1069.4	2.01927	0.517587	3.90132	9.57e-05	0.00066542		ENSG00000006116	1069.4	-4.79681	0.104898	-45.7283	0	0		ENSG00000006116	1069.4	-4.79681	0.104898	-45.7283	0	0		ENSG00000006116	1069.4	2.01927	0.517587	3.90132	9.56691e-05	0.000665424		ENSG00000006116	1069.4	2.01927	0.517587	3.90132	9.56691e-05	0.000665424
ENSG00000006118	4108.23	-0.261575	0.185755	-1.40817	0.15908	0.286093		ENSG00000006118	4108.23	0.316346	0.0375519	8.42422	3.63148e-17	6.0593e-17		ENSG00000006118	4108.23	0.316346	0.0375519	8.42422	3.63148e-17	6.0593e-17		ENSG00000006118	4108.23	-0.261575	0.185755	-1.40817	0.15908	0.286093		ENSG00000006118	4108.23	-0.261575	0.185755	-1.40817	0.15908	0.286093
ENSG00000006125	8440.34	0.134313	0.0807393	1.66354	0.0962037	0.194809		ENSG00000006125	8440.34	0.186796	0.0163242	11.4429	2.55258e-30	4.73953e-30		ENSG00000006125	8440.34	0.186796	0.0163242	11.4429	2.55258e-30	4.73953e-30		ENSG00000006125	8440.34	0.134313	0.0807393	1.66354	0.0962037	0.194809		ENSG00000006125	8440.34	0.134313	0.0807393	1.66354	0.0962037	0.194809
ENSG00000006128	1201.75	1.87184	0.622393	3.00749	0.00263413	0.0106116		ENSG00000006128	1201.75	-3.48338	0.125904	-27.6669	1.74551e-168	6.03449e-168		ENSG00000006128	1201.75	-3.48338	0.125904	-27.6669	1.74551e-168	6.03449e-168		ENSG00000006128	1201.75	1.87184	0.622393	3.00749	0.00263413	0.0106116		ENSG00000006128	1201.75	1.87184	0.622393	3.00749	0.00263413	0.0106116
ENSG00000006194	1094.28	-0.380368	0.0873651	-4.35377	1.34e-05	0.00012518		ENSG00000006194	1094.28	0.0840094	0.0176283	4.76559	1.88298e-06	2.736e-06		ENSG00000006194	1094.28	0.0840094	0.0176283	4.76559	1.88298e-06	2.736e-06		ENSG00000006194	1094.28	-0.380368	0.0873651	-4.35377	1.33814e-05	0.000125178		ENSG00000006194	1094.28	-0.380368	0.0873651	-4.35377	1.33814e-05	0.000125178
ENSG00000006210	2255.35	0.475311	0.296702	1.60198	0.10916	0.214939		ENSG00000006210	2255.35	-0.50633	0.0599886	-8.44043	3.16167e-17	5.27769e-17		ENSG00000006210	2255.35	-0.50633	0.0599886	-8.44043	3.16167e-17	5.27769e-17		ENSG00000006210	2255.35	0.475311	0.296702	1.60198	0.10916	0.214939		ENSG00000006210	2255.35	0.475311	0.296702	1.60198	0.10916	0.214939
ENSG00000006282	2297.09	-0.218152	0.170007	-1.28319	0.199425	0.340248		ENSG00000006282	2297.09	-0.29744	0.0343628	-8.65587	4.8915e-18	8.23299e-18		ENSG00000006282	2297.09	-0.29744	0.0343628	-8.65587	4.8915e-18	8.23299e-18		ENSG00000006282	2297.09	-0.218152	0.170007	-1.28319	0.199425	0.340248		ENSG00000006282	2297.09	-0.218152	0.170007	-1.28319	0.199425	0.340248
ENSG00000006283	879.447	-0.33082	0.388603	-0.851305	0.3946	0.56369		ENSG00000006283	879.447	-1.03133	0.0785409	-13.1311	2.18318e-39	4.30614e-39		ENSG00000006283	879.447	-1.03133	0.0785409	-13.1311	2.18318e-39	4.30614e-39		ENSG00000006283	879.447	-0.33082	0.388603	-0.851305	0.3946	0.56369		ENSG00000006283	879.447	-0.33082	0.388603	-0.851305	0.3946	0.56369
ENSG00000006327	365.569	0.149781	0.449926	0.332901	0.739209	0.868884		ENSG00000006327	365.569	3.97531	0.0909929	43.6881	0	0		ENSG00000006327	365.569	3.97531	0.0909929	43.6881	0	0		ENSG00000006327	365.569	0.149781	0.449926	0.332901	0.739209	0.868884		ENSG00000006327	365.569	0.149781	0.449926	0.332901	0.739209	0.868884
ENSG00000006377	147.149	0.642266	0.704081	0.912206	0.361661	0.529515		ENSG00000006377	147.149	-1.43609	0.142398	-10.0851	6.43308e-24	1.13868e-23		ENSG00000006377	147.149	-1.43609	0.142398	-10.0851	6.43308e-24	1.13868e-23		ENSG00000006377	147.149	0.642266	0.704081	0.912206	0.361661	0.529515		ENSG00000006377	147.149	0.642266	0.704081	0.912206	0.361661	0.529515
ENSG00000006432	1482.08	0.0067799	0.334802	0.0202505	0.983844	1		ENSG00000006432	1482.08	-2.76673	0.0676625	-40.8902	0	0		ENSG00000006432	1482.08	-2.76673	0.0676625	-40.8902	0	0		ENSG00000006432	1482.08	0.0067799	0.334802	0.0202505	0.983844	1		ENSG00000006432	1482.08	0.0067799	0.334802	0.0202505	0.983844	1
ENSG00000006451	1389.72	0.355001	0.138619	2.56098	0.0104378	0.0333041		ENSG00000006451	1389.72	0.48923	0.0280354	17.4504	3.41753e-68	7.91268e-68		ENSG00000006451	1389.72	0.48923	0.0280354	17.4504	3.41753e-68	7.91268e-68		ENSG00000006451	1389.72	0.355001	0.138619	2.56098	0.0104378	0.0333041		ENSG00000006451	1389.72	0.355001	0.138619	2.56098	0.0104378	0.0333041
ENSG00000006453	73.5043	-0.0720818	0.215935	-0.333813	0.738521	0.868369		ENSG00000006453	73.5043	-0.505999	0.0435227	-11.6261	3.03616e-31	5.67949e-31		ENSG00000006453	73.5043	-0.505999	0.0435227	-11.6261	3.03616e-31	5.67949e-31		ENSG00000006453	73.5043	-0.0720818	0.215935	-0.333813	0.738521	0.868369		ENSG00000006453	73.5043	-0.0720818	0.215935	-0.333813	0.738521	0.868369
ENSG00000006459	573.641	-0.401946	0.175691	-2.2878	0.0221493	0.0610575		ENSG00000006459	573.641	0.725663	0.0355035	20.4392	7.49247e-93	1.93995e-92		ENSG00000006459	573.641	0.725663	0.0355035	20.4392	7.49247e-93	1.93995e-92		ENSG00000006459	573.641	-0.401946	0.175691	-2.2878	0.0221493	0.0610575		ENSG00000006459	573.641	-0.401946	0.175691	-2.2878	0.0221493	0.0610575
ENSG00000006468	3102.14	-0.288423	0.418113	-0.68982	0.490307	0.657749		ENSG00000006468	3102.14	0.95249	0.0845295	11.2681	1.88512e-29	3.47729e-29		ENSG00000006468	3102.14	0.95249	0.0845295	11.2681	1.88512e-29	3.47729e-29		ENSG00000006468	3102.14	-0.288423	0.418113	-0.68982	0.490307	0.657749		ENSG00000006468	3102.14	-0.288423	0.418113	-0.68982	0.490307	0.657749
ENSG00000006530	1207.69	-0.33684	0.109581	-3.0739	0.00211282	0.00883622		ENSG00000006530	1207.69	0.0764063	0.022132	3.4523	0.000555829	0.000765509		ENSG00000006530	1207.69	0.0764063	0.022132	3.4523	0.000555829	0.000765509		ENSG00000006530	1207.69	-0.33684	0.109581	-3.0739	0.00211282	0.00883622		ENSG00000006530	1207.69	-0.33684	0.109581	-3.0739	0.00211282	0.00883622
ENSG00000006534	210.441	0.508842	0.284732	1.78709	0.0739226	0.159088		ENSG00000006534	210.441	1.59792	0.0576109	27.7364	2.54161e-169	8.80903e-169		ENSG00000006534	210.441	1.59792	0.0576109	27.7364	2.54161e-169	8.80903e-169		ENSG00000006534	210.441	0.508842	0.284732	1.78709	0.0739226	0.159088		ENSG00000006534	210.441	0.508842	0.284732	1.78709	0.0739226	0.159088
ENSG00000006555	50.7221	1.75805	0.49122	3.57894	0.00034499	0.0019538		ENSG00000006555	50.7221	-4.22843	0.102642	-41.1958	0	0		ENSG00000006555	50.7221	-4.22843	0.102642	-41.1958	0	0		ENSG00000006555	50.7221	1.75805	0.49122	3.57894	0.000344989	0.0019538		ENSG00000006555	50.7221	1.75805	0.49122	3.57894	0.000344989	0.0019538
ENSG00000006576	531.681	0.0818653	0.12608	0.649312	0.516137	0.682404		ENSG00000006576	531.681	0.920988	0.025507	36.1073	1.74168e-285	8.59875e-285		ENSG00000006576	531.681	0.920988	0.025507	36.1073	1.74168e-285	8.59875e-285		ENSG00000006576	531.681	0.0818653	0.12608	0.649312	0.516137	0.682404		ENSG00000006576	531.681	0.0818653	0.12608	0.649312	0.516137	0.682404
ENSG00000006606	4.15169	2.66375	0.495909	5.37144	7.81e-08	1.59e-06		ENSG00000006606	4.15169	2.86878	0.102874	27.8862	3.92456e-171	1.36898e-170		ENSG00000006606	4.15169	2.86878	0.102874	27.8862	3.92456e-171	1.36898e-170		ENSG00000006606	4.15169	2.66375	0.495909	5.37144	7.81092e-08	1.59001e-06		ENSG00000006606	4.15169	2.66375	0.495909	5.37144	7.81092e-08	1.59001e-06
ENSG00000006607	1208.79	-0.67645	0.171728	-3.93909	8.18e-05	0.00058272		ENSG00000006607	1208.79	0.0495483	0.0346871	1.42843	0.153167	0.19146		ENSG00000006607	1208.79	0.0495483	0.0346871	1.42843	0.153167	0.19146		ENSG00000006607	1208.79	-0.67645	0.171728	-3.93909	8.17904e-05	0.000582719		ENSG00000006607	1208.79	-0.67645	0.171728	-3.93909	8.17904e-05	0.000582719
ENSG00000006611	431.096	0.692632	0.504069	1.37408	0.169416	0.300272		ENSG00000006611	431.096	-1.37978	0.101935	-13.5358	9.61106e-42	1.92412e-41		ENSG00000006611	431.096	-1.37978	0.101935	-13.5358	9.61106e-42	1.92412e-41		ENSG00000006611	431.096	0.692632	0.504069	1.37408	0.169416	0.300272		ENSG00000006611	431.096	0.692632	0.504069	1.37408	0.169416	0.300272
ENSG00000006625	617.393	0.18361	0.138167	1.3289	0.183881	0.31991		ENSG00000006625	617.393	-0.749276	0.0279352	-26.8219	1.79287e-158	5.98106e-158		ENSG00000006625	617.393	-0.749276	0.0279352	-26.8219	1.79287e-158	5.98106e-158		ENSG00000006625	617.393	0.18361	0.138167	1.3289	0.183881	0.31991		ENSG00000006625	617.393	0.18361	0.138167	1.3289	0.183881	0.31991
ENSG00000006634	170.682	-0.286761	0.154113	-1.86072	0.0627839	0.14015		ENSG00000006634	170.682	2.24182	0.0312098	71.8304	0	0		ENSG00000006634	170.682	2.24182	0.0312098	71.8304	0	0		ENSG00000006634	170.682	-0.286761	0.154113	-1.86072	0.0627839	0.14015		ENSG00000006634	170.682	-0.286761	0.154113	-1.86072	0.0627839	0.14015
ENSG00000006638	42.9928	0.964023	0.281777	3.42122	0.0006234	0.00320887		ENSG00000006638	42.9928	1.43797	0.0572688	25.1092	3.94614e-139	1.22823e-138		ENSG00000006638	42.9928	1.43797	0.0572688	25.1092	3.94614e-139	1.22823e-138		ENSG00000006638	42.9928	0.964023	0.281777	3.42122	0.000623403	0.00320887		ENSG00000006638	42.9928	0.964023	0.281777	3.42122	0.000623403	0.00320887
ENSG00000006652	1165.84	-0.0792811	0.137233	-0.577711	0.56346	0.724763		ENSG00000006652	1165.84	-1.51438	0.0277074	-54.6561	0	0		ENSG00000006652	1165.84	-1.51438	0.0277074	-54.6561	0	0		ENSG00000006652	1165.84	-0.0792811	0.137233	-0.577711	0.56346	0.724763		ENSG00000006652	1165.84	-0.0792811	0.137233	-0.577711	0.56346	0.724763
ENSG00000006659	0.27444	-0.610761	1.24868	-0.489123	0.624755	0.778754		ENSG00000006659	0.27444	0.178594	0.246451	0.724663	0.468659	0.555393		ENSG00000006659	0.27444	0.178594	0.246451	0.724663	0.468659	0.555393		ENSG00000006659	0.27444	-0.61076	1.24868	-0.489123	0.624755	0.778754		ENSG00000006659	0.27444	-0.61076	1.24868	-0.489123	0.624755	0.778754
ENSG00000006695	232.345	-0.0082009	0.0931609	-0.0880289	0.929854	0.998756		ENSG00000006695	232.345	0.78302	0.0188617	41.5138	0	0		ENSG00000006695	232.345	0.78302	0.0188617	41.5138	0	0		ENSG00000006695	232.345	-0.00820086	0.0931609	-0.0880289	0.929854	0.998756		ENSG00000006695	232.345	-0.00820086	0.0931609	-0.0880289	0.929854	0.998756
ENSG00000006704	536.783	-0.101266	0.114557	-0.883981	0.376707	0.545086		ENSG00000006704	536.783	0.938685	0.0231663	40.5194	0	0		ENSG00000006704	536.783	0.938685	0.0231663	40.5194	0	0		ENSG00000006704	536.783	-0.101266	0.114557	-0.883981	0.376707	0.545086		ENSG00000006704	536.783	-0.101266	0.114557	-0.883981	0.376707	0.545086
ENSG00000006712	1654.06	0.22645	0.0912794	2.48084	0.0131073	0.0401579		ENSG00000006712	1654.06	0.0910771	0.0184622	4.93315	8.09135e-07	1.18374e-06		ENSG00000006712	1654.06	0.0910771	0.0184622	4.93315	8.09135e-07	1.18374e-06		ENSG00000006712	1654.06	0.22645	0.0912794	2.48084	0.0131073	0.0401579		ENSG00000006712	1654.06	0.22645	0.0912794	2.48084	0.0131073	0.0401579
ENSG00000006715	2147.86	-0.234445	0.120416	-1.94696	0.0515392	0.12015		ENSG00000006715	2147.86	0.674418	0.0243417	27.7062	5.87342e-169	2.03347e-168		ENSG00000006715	2147.86	0.674418	0.0243417	27.7062	5.87342e-169	2.03347e-168		ENSG00000006715	2147.86	-0.234445	0.120416	-1.94696	0.0515392	0.12015		ENSG00000006715	2147.86	-0.234445	0.120416	-1.94696	0.0515392	0.12015
ENSG00000006740	1624.11	0.957979	0.266	3.60142	0.00031648	0.0018224		ENSG00000006740	1624.11	-3.93362	0.0538705	-73.02	0	0		ENSG00000006740	1624.11	-3.93362	0.0538705	-73.02	0	0		ENSG00000006740	1624.11	0.957979	0.266	3.60142	0.000316482	0.0018224		ENSG00000006740	1624.11	0.957979	0.266	3.60142	0.000316482	0.0018224
ENSG00000006744	1454.84	-0.0714262	0.0720236	-0.991705	0.321341	0.485349		ENSG00000006744	1454.84	0.630299	0.0145622	43.2833	0	0		ENSG00000006744	1454.84	0.630299	0.0145622	43.2833	0	0		ENSG00000006744	1454.84	-0.0714262	0.0720236	-0.991705	0.321341	0.485349		ENSG00000006744	1454.84	-0.0714262	0.0720236	-0.991705	0.321341	0.485349
ENSG00000006747	443.202	0.183085	0.482502	0.37945	0.704354	0.843349		ENSG00000006747	443.202	2.21197	0.0975592	22.6731	8.25564e-114	2.335e-113		ENSG00000006747	443.202	2.21197	0.0975592	22.6731	8.25564e-114	2.335e-113		ENSG00000006747	443.202	0.183085	0.482502	0.37945	0.704354	0.843349		ENSG00000006747	443.202	0.183085	0.482502	0.37945	0.704354	0.843349
ENSG00000006756	430.504	-0.107601	0.167211	-0.643502	0.519899	0.685731		ENSG00000006756	430.504	1.56966	0.0338206	46.4114	0	0		ENSG00000006756	430.504	1.56966	0.0338206	46.4114	0	0		ENSG00000006756	430.504	-0.107601	0.167211	-0.643502	0.519899	0.685731		ENSG00000006756	430.504	-0.107601	0.167211	-0.643502	0.519899	0.685731
ENSG00000006757	474.007	0.343958	0.209138	1.64465	0.100043	0.200847		ENSG00000006757	474.007	-0.401182	0.0423	-9.48421	2.44229e-21	4.23482e-21		ENSG00000006757	474.007	-0.401182	0.0423	-9.48421	2.44229e-21	4.23482e-21		ENSG00000006757	474.007	0.343958	0.209138	1.64465	0.100043	0.200847		ENSG00000006757	474.007	0.343958	0.209138	1.64465	0.100043	0.200847
ENSG00000006788	2.25038	-0.157189	0.628157	-0.250239	0.802402	0.914389		ENSG00000006788	2.25038	-0.169789	0.125473	-1.35319	0.175994	0.218941		ENSG00000006788	2.25038	-0.169789	0.125473	-1.35319	0.175994	0.218941		ENSG00000006788	2.25038	-0.157189	0.628157	-0.250239	0.802402	0.914389		ENSG00000006788	2.25038	-0.157189	0.628157	-0.250239	0.802402	0.914389
ENSG00000006831	3363	0.0432513	0.244437	0.176943	0.859553	0.954618		ENSG00000006831	3363	-0.56006	0.0494166	-11.3334	8.96066e-30	1.65767e-29		ENSG00000006831	3363	-0.56006	0.0494166	-11.3334	8.96066e-30	1.65767e-29		ENSG00000006831	3363	0.0432513	0.244437	0.176943	0.859553	0.954618		ENSG00000006831	3363	0.0432513	0.244437	0.176943	0.859553	0.954618
ENSG00000006837	121.575	-0.81546	0.116401	-7.00559	2.46e-12	1.93e-10		ENSG00000006837	121.575	-1.37143	0.0218484	-62.7703	0	0		ENSG00000006837	121.575	-1.37143	0.0218484	-62.7703	0	0		ENSG00000006837	121.575	-0.81546	0.116401	-7.00559	2.45953e-12	1.92909e-10		ENSG00000006837	121.575	-0.81546	0.116401	-7.00559	2.45953e-12	1.92909e-10
ENSG00000007001	73.9072	-0.459217	0.244362	-1.87925	0.060211	0.135559		ENSG00000007001	73.9072	-1.48774	0.0485855	-30.6211	6.42103e-206	2.5109e-205		ENSG00000007001	73.9072	-1.48774	0.0485855	-30.6211	6.42103e-206	2.5109e-205		ENSG00000007001	73.9072	-0.459217	0.244362	-1.87925	0.060211	0.135559		ENSG00000007001	73.9072	-0.459217	0.244362	-1.87925	0.060211	0.135559
ENSG00000007038	4.93516	0.0571202	0.483365	0.118172	0.905932	0.98441		ENSG00000007038	4.93516	0.335637	0.0978782	3.42913	0.000605526	0.000832996		ENSG00000007038	4.93516	0.335637	0.0978782	3.42913	0.000605526	0.000832996		ENSG00000007038	4.93516	0.0571202	0.483365	0.118172	0.905932	0.98441		ENSG00000007038	4.93516	0.0571202	0.483365	0.118172	0.905932	0.98441
ENSG00000007047	1837.03	0.308636	0.155776	1.98129	0.047559	0.112618		ENSG00000007047	1837.03	-0.778025	0.0314982	-24.7006	1.05307e-134	3.22195e-134		ENSG00000007047	1837.03	-0.778025	0.0314982	-24.7006	1.05307e-134	3.22195e-134		ENSG00000007047	1837.03	0.308636	0.155776	1.98129	0.0475591	0.112618		ENSG00000007047	1837.03	0.308636	0.155776	1.98129	0.0475591	0.112618
ENSG00000007062	288.265	-0.887825	0.291436	-3.04638	0.00231614	0.0095211		ENSG00000007062	288.265	1.87081	0.058902	31.7614	2.21313e-221	9.08625e-221		ENSG00000007062	288.265	1.87081	0.058902	31.7614	2.21313e-221	9.08625e-221		ENSG00000007062	288.265	-0.887825	0.291436	-3.04638	0.00231614	0.0095211		ENSG00000007062	288.265	-0.887825	0.291436	-3.04638	0.00231614	0.0095211
ENSG00000007080	1662.33	0.435482	0.162509	2.67974	0.00736794	0.0249838		ENSG00000007080	1662.33	-0.53484	0.0328639	-16.2744	1.49956e-59	3.32332e-59		ENSG00000007080	1662.33	-0.53484	0.0328639	-16.2744	1.49956e-59	3.32332e-59		ENSG00000007080	1662.33	0.435482	0.162509	2.67974	0.00736794	0.0249839		ENSG00000007080	1662.33	0.435482	0.162509	2.67974	0.00736794	0.0249839
ENSG00000007129	38.6684	0.292206	0.41121	0.710599	0.477332	0.645336		ENSG00000007129	38.6684	1.07666	0.0832615	12.9311	3.00432e-38	5.88332e-38		ENSG00000007129	38.6684	1.07666	0.0832615	12.9311	3.00432e-38	5.88332e-38		ENSG00000007129	38.6684	0.292206	0.41121	0.710599	0.477332	0.645336		ENSG00000007129	38.6684	0.292206	0.41121	0.710599	0.477332	0.645336
ENSG00000007168	7049.65	-0.0618488	0.116537	-0.530722	0.595612	0.753274		ENSG00000007168	7049.65	-0.472832	0.0235581	-20.0709	1.32597e-89	3.38541e-89		ENSG00000007168	7049.65	-0.472832	0.0235581	-20.0709	1.32597e-89	3.38541e-89		ENSG00000007168	7049.65	-0.0618488	0.116537	-0.530722	0.595612	0.753274		ENSG00000007168	7049.65	-0.0618488	0.116537	-0.530722	0.595612	0.753274
ENSG00000007171	195.065	-2.2136	0.373098	-5.93302	2.97e-09	9.27e-08		ENSG00000007171	195.065	3.16819	0.0753615	42.04	0	0		ENSG00000007171	195.065	3.16819	0.0753615	42.04	0	0		ENSG00000007171	195.065	-2.2136	0.373098	-5.93302	2.97411e-09	9.27195e-08		ENSG00000007171	195.065	-2.2136	0.373098	-5.93302	2.97411e-09	9.27195e-08
ENSG00000007174	434.504	-0.789834	0.395797	-1.99555	0.0459825	0.109621		ENSG00000007174	434.504	1.3492	0.0800048	16.864	8.27394e-64	1.87582e-63		ENSG00000007174	434.504	1.3492	0.0800048	16.864	8.27394e-64	1.87582e-63		ENSG00000007174	434.504	-0.789834	0.395797	-1.99555	0.0459825	0.109621		ENSG00000007174	434.504	-0.789834	0.395797	-1.99555	0.0459825	0.109621
ENSG00000007202	3344.24	-0.339656	0.107465	-3.16063	0.00157428	0.00693835		ENSG00000007202	3344.24	0.429979	0.0217208	19.7957	3.23994e-87	8.19591e-87		ENSG00000007202	3344.24	0.429979	0.0217208	19.7957	3.23994e-87	8.19591e-87		ENSG00000007202	3344.24	-0.339656	0.107465	-3.16063	0.00157428	0.00693835		ENSG00000007202	3344.24	-0.339656	0.107465	-3.16063	0.00157428	0.00693835
ENSG00000007216	0.862937	0.322148	0.744704	0.432586	0.665315	0.813089		ENSG00000007216	0.862937	-2.0173	0.148477	-13.5866	4.80944e-42	9.6466e-42		ENSG00000007216	0.862937	-2.0173	0.148477	-13.5866	4.80944e-42	9.6466e-42		ENSG00000007216	0.862937	0.322148	0.744704	0.432586	0.665315	0.813089		ENSG00000007216	0.862937	0.322148	0.744704	0.432586	0.665315	0.813089
ENSG00000007237	11661.5	0.420373	0.213568	1.96833	0.0490296	0.115467		ENSG00000007237	11661.5	-1.20176	0.0431781	-27.8327	1.74245e-170	6.06261e-170		ENSG00000007237	11661.5	-1.20176	0.0431781	-27.8327	1.74245e-170	6.06261e-170		ENSG00000007237	11661.5	0.420373	0.213568	1.96833	0.0490296	0.115467		ENSG00000007237	11661.5	0.420373	0.213568	1.96833	0.0490296	0.115467
ENSG00000007255	339.816	0.1733	0.177901	0.974137	0.329989	0.494837		ENSG00000007255	339.816	0.00103712	0.0359802	0.0288248	0.977004	0.979735		ENSG00000007255	339.816	0.00103712	0.0359802	0.0288248	0.977004	0.979735		ENSG00000007255	339.816	0.1733	0.177901	0.974137	0.329989	0.494837		ENSG00000007255	339.816	0.1733	0.177901	0.974137	0.329989	0.494837
ENSG00000007264	994.321	0.965716	0.380436	2.53844	0.0111346	0.0351454		ENSG00000007264	994.321	-3.72727	0.077007	-48.4016	0	0		ENSG00000007264	994.321	-3.72727	0.077007	-48.4016	0	0		ENSG00000007264	994.321	0.965716	0.380436	2.53844	0.0111346	0.0351454		ENSG00000007264	994.321	0.965716	0.380436	2.53844	0.0111346	0.0351454
ENSG00000007306	1.04279	1.4945	0.815932	1.83165	0.0670043	0.147433		ENSG00000007306	1.04279	-2.88533	0.171763	-16.7983	2.51096e-63	5.67878e-63		ENSG00000007306	1.04279	-2.88533	0.171763	-16.7983	2.51096e-63	5.67878e-63		ENSG00000007306	1.04279	1.4945	0.815932	1.83165	0.0670043	0.147433		ENSG00000007306	1.04279	1.4945	0.815932	1.83165	0.0670043	0.147433
ENSG00000007312	12.7355	0.108538	0.274074	0.396018	0.692092	0.833928		ENSG00000007312	12.7355	0.34302	0.0555982	6.16963	6.84504e-10	1.05037e-09		ENSG00000007312	12.7355	0.34302	0.0555982	6.16963	6.84504e-10	1.05037e-09		ENSG00000007312	12.7355	0.108538	0.274074	0.396018	0.692092	0.833928		ENSG00000007312	12.7355	0.108538	0.274074	0.396018	0.692092	0.833928
ENSG00000007314	18.3997	-1.9259	0.364821	-5.27903	1.3e-07	2.46e-06		ENSG00000007314	18.3997	0.170879	0.0696693	2.45272	0.0141781	0.0186952		ENSG00000007314	18.3997	0.170879	0.0696693	2.45272	0.0141781	0.0186952		ENSG00000007314	18.3997	-1.9259	0.364821	-5.27903	1.2987e-07	2.45637e-06		ENSG00000007314	18.3997	-1.9259	0.364821	-5.27903	1.2987e-07	2.45637e-06
ENSG00000007341	400.507	-0.464293	0.092034	-5.0448	4.54e-07	7.14e-06		ENSG00000007341	400.507	0.515666	0.0185354	27.8206	2.44505e-170	8.50413e-170		ENSG00000007341	400.507	0.515666	0.0185354	27.8206	2.44505e-170	8.50413e-170		ENSG00000007341	400.507	-0.464293	0.092034	-5.0448	4.53995e-07	7.13738e-06		ENSG00000007341	400.507	-0.464293	0.092034	-5.0448	4.53995e-07	7.13738e-06
ENSG00000007350	21.7526	-1.1165	0.454022	-2.45913	0.0139275	0.0421668		ENSG00000007350	21.7526	2.77817	0.0917574	30.2774	2.2777e-201	8.78651e-201		ENSG00000007350	21.7526	2.77817	0.0917574	30.2774	2.2777e-201	8.78651e-201		ENSG00000007350	21.7526	-1.1165	0.454022	-2.45913	0.0139275	0.0421668		ENSG00000007350	21.7526	-1.1165	0.454022	-2.45913	0.0139275	0.0421668
ENSG00000007372	1858.71	-0.282848	0.358404	-0.789188	0.430002	0.599261		ENSG00000007372	1858.71	-1.71828	0.0724403	-23.72	2.24138e-124	6.59143e-124		ENSG00000007372	1858.71	-1.71828	0.0724403	-23.72	2.24138e-124	6.59143e-124		ENSG00000007372	1858.71	-0.282848	0.358404	-0.789187	0.430002	0.599261		ENSG00000007372	1858.71	-0.282848	0.358404	-0.789187	0.430002	0.599261
ENSG00000007376	608.982	-0.118642	0.136383	-0.86992	0.384344	0.552949		ENSG00000007376	608.982	0.114679	0.0275601	4.16104	3.16798e-05	4.49017e-05		ENSG00000007376	608.982	0.114679	0.0275601	4.16104	3.16798e-05	4.49017e-05		ENSG00000007376	608.982	-0.118642	0.136383	-0.86992	0.384344	0.552949		ENSG00000007376	608.982	-0.118642	0.136383	-0.86992	0.384344	0.552949
ENSG00000007384	595.555	-0.0919058	0.193419	-0.475164	0.63467	0.787146		ENSG00000007384	595.555	0.357588	0.0391001	9.14545	5.93847e-20	1.01675e-19		ENSG00000007384	595.555	0.357588	0.0391001	9.14545	5.93847e-20	1.01675e-19		ENSG00000007384	595.555	-0.0919058	0.193419	-0.475164	0.63467	0.787146		ENSG00000007384	595.555	-0.0919058	0.193419	-0.475164	0.63467	0.787146
ENSG00000007392	2588	-0.440509	0.13123	-3.35676	0.00078861	0.00389497		ENSG00000007392	2588	-0.778816	0.026507	-29.3816	9.44874e-190	3.5087e-189		ENSG00000007392	2588	-0.778816	0.026507	-29.3816	9.44874e-190	3.5087e-189		ENSG00000007392	2588	-0.440509	0.13123	-3.35676	0.000788614	0.00389497		ENSG00000007392	2588	-0.440509	0.13123	-3.35676	0.000788614	0.00389497
ENSG00000007402	933.553	0.107326	0.304377	0.352607	0.724383	0.858275		ENSG00000007402	933.553	-3.22136	0.0614961	-52.3832	0	0		ENSG00000007402	933.553	-3.22136	0.0614961	-52.3832	0	0		ENSG00000007402	933.553	0.107326	0.304377	0.352607	0.724383	0.858275		ENSG00000007402	933.553	0.107326	0.304377	0.352607	0.724383	0.858275
ENSG00000007516	3784.97	-0.337532	0.432618	-0.780209	0.435268	0.604381		ENSG00000007516	3784.97	-1.6757	0.0874543	-19.1608	7.86099e-82	1.94126e-81		ENSG00000007516	3784.97	-1.6757	0.0874543	-19.1608	7.86099e-82	1.94126e-81		ENSG00000007516	3784.97	-0.337532	0.432618	-0.780209	0.435268	0.604381		ENSG00000007516	3784.97	-0.337532	0.432618	-0.780209	0.435268	0.604381
ENSG00000007520	1431.15	0.0843266	0.140275	0.601152	0.547739	0.710957		ENSG00000007520	1431.15	-0.86528	0.0283539	-30.5171	1.54462e-204	6.01515e-204		ENSG00000007520	1431.15	-0.86528	0.0283539	-30.5171	1.54462e-204	6.01515e-204		ENSG00000007520	1431.15	0.0843266	0.140275	0.601152	0.547739	0.710957		ENSG00000007520	1431.15	0.0843266	0.140275	0.601152	0.547739	0.710957
ENSG00000007541	1826.45	-0.263094	0.124335	-2.11602	0.0343435	0.0868515		ENSG00000007541	1826.45	-0.707991	0.0251144	-28.1906	7.62447e-175	2.69248e-174		ENSG00000007541	1826.45	-0.707991	0.0251144	-28.1906	7.62447e-175	2.69248e-174		ENSG00000007541	1826.45	-0.263094	0.124335	-2.11602	0.0343435	0.0868515		ENSG00000007541	1826.45	-0.263094	0.124335	-2.11602	0.0343435	0.0868515
ENSG00000007545	1311.39	0.0441387	0.262654	0.168049	0.866545	0.958859		ENSG00000007545	1311.39	-1.73836	0.0530881	-32.7448	3.60298e-235	1.54349e-234		ENSG00000007545	1311.39	-1.73836	0.0530881	-32.7448	3.60298e-235	1.54349e-234		ENSG00000007545	1311.39	0.0441387	0.262654	0.168049	0.866545	0.958859		ENSG00000007545	1311.39	0.0441387	0.262654	0.168049	0.866545	0.958859
ENSG00000007866	191.068	0.408661	0.276895	1.47587	0.139979	0.259717		ENSG00000007866	191.068	1.26311	0.0560262	22.545	1.50264e-112	4.22213e-112		ENSG00000007866	191.068	1.26311	0.0560262	22.545	1.50264e-112	4.22213e-112		ENSG00000007866	191.068	0.408661	0.276895	1.47587	0.139979	0.259717		ENSG00000007866	191.068	0.408661	0.276895	1.47587	0.139979	0.259717
ENSG00000007908	142.356	0.959475	0.70261	1.36559	0.172069	0.303921		ENSG00000007908	142.356	-2.91061	0.142257	-20.4603	4.86538e-93	1.26054e-92		ENSG00000007908	142.356	-2.91061	0.142257	-20.4603	4.86538e-93	1.26054e-92		ENSG00000007908	142.356	0.959475	0.70261	1.36559	0.172069	0.303921		ENSG00000007908	142.356	0.959475	0.70261	1.36559	0.172069	0.303921
ENSG00000007923	1527.99	-0.127514	0.0907796	-1.40465	0.160125	0.287563		ENSG00000007923	1527.99	-1.01008	0.0183209	-55.1327	0	0		ENSG00000007923	1527.99	-1.01008	0.0183209	-55.1327	0	0		ENSG00000007923	1527.99	-0.127514	0.0907796	-1.40465	0.160125	0.287563		ENSG00000007923	1527.99	-0.127514	0.0907796	-1.40465	0.160125	0.287563
ENSG00000007933	45.0946	0.815732	0.325305	2.50759	0.0121558	0.0378187		ENSG00000007933	45.0946	0.225947	0.066039	3.42142	0.00062295	0.000856637		ENSG00000007933	45.0946	0.225947	0.066039	3.42142	0.00062295	0.000856637		ENSG00000007933	45.0946	0.815732	0.325305	2.50759	0.0121558	0.0378187		ENSG00000007933	45.0946	0.815732	0.325305	2.50759	0.0121558	0.0378187
ENSG00000007944	460.051	0.33558	0.174548	1.92257	0.054534	0.125452		ENSG00000007944	460.051	-0.0836178	0.0353112	-2.36802	0.0178834	0.0234893		ENSG00000007944	460.051	-0.0836178	0.0353112	-2.36802	0.0178834	0.0234893		ENSG00000007944	460.051	0.33558	0.174548	1.92257	0.054534	0.125452		ENSG00000007944	460.051	0.33558	0.174548	1.92257	0.054534	0.125452
ENSG00000007952	22.8397	0.432155	0.189493	2.28058	0.0225733	0.0620246		ENSG00000007952	22.8397	-0.10783	0.0388158	-2.778	0.00546938	0.00731642		ENSG00000007952	22.8397	-0.10783	0.0388158	-2.778	0.00546938	0.00731642		ENSG00000007952	22.8397	0.432155	0.189493	2.28058	0.0225733	0.0620246		ENSG00000007952	22.8397	0.432155	0.189493	2.28058	0.0225733	0.0620246
ENSG00000007968	38.1759	-0.353728	0.407604	-0.867823	0.385491	0.55424		ENSG00000007968	38.1759	6.43268	0.0836945	76.8591	0	0		ENSG00000007968	38.1759	6.43268	0.0836945	76.8591	0	0		ENSG00000007968	38.1759	-0.353728	0.407604	-0.867823	0.385491	0.55424		ENSG00000007968	38.1759	-0.353728	0.407604	-0.867823	0.385491	0.55424
ENSG00000008018	2101.3	0.323238	0.104686	3.0877	0.00201714	0.00851449		ENSG00000008018	2101.3	0.926996	0.0211738	43.7804	0	0		ENSG00000008018	2101.3	0.926996	0.0211738	43.7804	0	0		ENSG00000008018	2101.3	0.323238	0.104686	3.0877	0.00201714	0.00851449		ENSG00000008018	2101.3	0.323238	0.104686	3.0877	0.00201714	0.00851449
ENSG00000008056	6510.51	1.77381	0.352015	5.03904	4.68e-07	7.32e-06		ENSG00000008056	6510.51	-4.35062	0.0712089	-61.0966	0	0		ENSG00000008056	6510.51	-4.35062	0.0712089	-61.0966	0	0		ENSG00000008056	6510.51	1.77381	0.352015	5.03904	4.67876e-07	7.32164e-06		ENSG00000008056	6510.51	1.77381	0.352015	5.03904	4.67876e-07	7.32164e-06
ENSG00000008083	1005.45	-0.0905643	0.213179	-0.424828	0.670962	0.817872		ENSG00000008083	1005.45	-0.317136	0.0430902	-7.35981	1.84168e-13	2.94835e-13		ENSG00000008083	1005.45	-0.317136	0.0430902	-7.35981	1.84168e-13	2.94835e-13		ENSG00000008083	1005.45	-0.0905643	0.213179	-0.424828	0.670962	0.817872		ENSG00000008083	1005.45	-0.0905643	0.213179	-0.424828	0.670962	0.817872
ENSG00000008086	1268.93	-0.0557024	0.250835	-0.222068	0.824261	0.930274		ENSG00000008086	1268.93	-1.09377	0.0506999	-21.5733	3.19705e-103	8.63694e-103		ENSG00000008086	1268.93	-1.09377	0.0506999	-21.5733	3.19705e-103	8.63694e-103		ENSG00000008086	1268.93	-0.0557024	0.250835	-0.222068	0.824261	0.930274		ENSG00000008086	1268.93	-0.0557024	0.250835	-0.222068	0.824261	0.930274
ENSG00000008118	984.617	1.02705	0.45941	2.23558	0.0253791	0.0682983		ENSG00000008118	984.617	-3.59426	0.092957	-38.6658	0	0		ENSG00000008118	984.617	-3.59426	0.092957	-38.6658	0	0		ENSG00000008118	984.617	1.02705	0.45941	2.23558	0.0253791	0.0682983		ENSG00000008118	984.617	1.02705	0.45941	2.23558	0.0253791	0.0682983
ENSG00000008128	1188.8	-0.451564	0.180224	-2.50557	0.0122255	0.0379846		ENSG00000008128	1188.8	-5.03572	0.0355842	-141.516	0	0		ENSG00000008128	1188.8	-5.03572	0.0355842	-141.516	0	0		ENSG00000008128	1188.8	-0.451564	0.180224	-2.50557	0.0122255	0.0379846		ENSG00000008128	1188.8	-0.451564	0.180224	-2.50557	0.0122255	0.0379846
ENSG00000008130	1333.51	0.0168155	0.0768735	0.218743	0.82685	0.931883		ENSG00000008130	1333.51	0.460365	0.0155452	29.6145	9.7218e-193	3.64737e-192		ENSG00000008130	1333.51	0.460365	0.0155452	29.6145	9.7218e-193	3.64737e-192		ENSG00000008130	1333.51	0.0168155	0.0768735	0.218743	0.82685	0.931883		ENSG00000008130	1333.51	0.0168155	0.0768735	0.218743	0.82685	0.931883
ENSG00000008196	65.6382	0.575005	1.03418	0.556	0.578211	0.73773		ENSG00000008196	65.6382	-1.17751	0.209145	-5.63011	1.80097e-08	2.70827e-08		ENSG00000008196	65.6382	-1.17751	0.209145	-5.63011	1.80097e-08	2.70827e-08		ENSG00000008196	65.6382	0.575005	1.03418	0.556	0.578211	0.73773		ENSG00000008196	65.6382	0.575005	1.03418	0.556	0.578211	0.73773
ENSG00000008197	2.1841	0.45975	1.50998	0.304473	0.760767	0.883956		ENSG00000008197	2.1841	-3.39249	0.304145	-11.1542	6.8303e-29	1.25524e-28		ENSG00000008197	2.1841	-3.39249	0.304145	-11.1542	6.8303e-29	1.25524e-28		ENSG00000008197	2.1841	0.45975	1.50998	0.304473	0.760767	0.883956		ENSG00000008197	2.1841	0.45975	1.50998	0.304473	0.760767	0.883956
ENSG00000008226	751.56	-0.601813	0.205159	-2.9334	0.00335267	0.0129928		ENSG00000008226	751.56	-1.93195	0.0413113	-46.7656	0	0		ENSG00000008226	751.56	-1.93195	0.0413113	-46.7656	0	0		ENSG00000008226	751.56	-0.601813	0.205159	-2.9334	0.00335267	0.0129928		ENSG00000008226	751.56	-0.601813	0.205159	-2.9334	0.00335267	0.0129928
ENSG00000008256	1506.92	-0.119547	0.14532	-0.822646	0.41071	0.579877		ENSG00000008256	1506.92	-0.03169	0.0293733	-1.07887	0.280644	0.342995		ENSG00000008256	1506.92	-0.03169	0.0293733	-1.07887	0.280644	0.342995		ENSG00000008256	1506.92	-0.119547	0.14532	-0.822645	0.41071	0.579877		ENSG00000008256	1506.92	-0.119547	0.14532	-0.822645	0.41071	0.579877
ENSG00000008277	2931.94	-0.450638	0.275043	-1.63843	0.101333	0.202772		ENSG00000008277	2931.94	-0.708329	0.0555958	-12.7407	3.51265e-37	6.83518e-37		ENSG00000008277	2931.94	-0.708329	0.0555958	-12.7407	3.51265e-37	6.83518e-37		ENSG00000008277	2931.94	-0.450638	0.275043	-1.63843	0.101333	0.202772		ENSG00000008277	2931.94	-0.450638	0.275043	-1.63843	0.101333	0.202772
ENSG00000008282	1622.9	0.515865	0.312629	1.65009	0.0989247	0.19911		ENSG00000008282	1622.9	0.538521	0.0632095	8.51961	1.60086e-17	2.67999e-17		ENSG00000008282	1622.9	0.538521	0.0632095	8.51961	1.60086e-17	2.67999e-17		ENSG00000008282	1622.9	0.515865	0.312629	1.65009	0.0989247	0.19911		ENSG00000008282	1622.9	0.515865	0.312629	1.65009	0.0989247	0.19911
ENSG00000008283	1090.51	0.470603	0.279774	1.68208	0.0925529	0.189269		ENSG00000008283	1090.51	-0.544687	0.0565712	-9.62835	6.06984e-22	1.05775e-21		ENSG00000008283	1090.51	-0.544687	0.0565712	-9.62835	6.06984e-22	1.05775e-21		ENSG00000008283	1090.51	0.470603	0.279774	1.68208	0.0925529	0.189269		ENSG00000008283	1090.51	0.470603	0.279774	1.68208	0.0925529	0.189269
ENSG00000008294	5986.08	-0.459756	0.131768	-3.48913	0.0004846	0.0025938		ENSG00000008294	5986.08	0.383414	0.0266358	14.3947	5.58823e-47	1.15446e-46		ENSG00000008294	5986.08	0.383414	0.0266358	14.3947	5.58823e-47	1.15446e-46		ENSG00000008294	5986.08	-0.459756	0.131768	-3.48913	0.000484597	0.0025938		ENSG00000008294	5986.08	-0.459756	0.131768	-3.48913	0.000484597	0.0025938
ENSG00000008300	2002.87	-0.462591	0.339484	-1.36263	0.172999	0.305173		ENSG00000008300	2002.87	-0.916796	0.0686196	-13.3606	1.02793e-40	2.04548e-40		ENSG00000008300	2002.87	-0.916796	0.0686196	-13.3606	1.02793e-40	2.04548e-40		ENSG00000008300	2002.87	-0.462591	0.339484	-1.36263	0.172999	0.305173		ENSG00000008300	2002.87	-0.462591	0.339484	-1.36263	0.172999	0.305173
ENSG00000008311	568.479	-0.798267	0.263594	-3.0284	0.00245851	0.00999723		ENSG00000008311	568.479	2.48736	0.0532923	46.6738	0	0		ENSG00000008311	568.479	2.48736	0.0532923	46.6738	0	0		ENSG00000008311	568.479	-0.798267	0.263594	-3.0284	0.00245851	0.00999723		ENSG00000008311	568.479	-0.798267	0.263594	-3.0284	0.00245851	0.00999723
ENSG00000008323	6.56008	-1.11919	0.384543	-2.91045	0.00360908	0.0138126		ENSG00000008323	6.56008	4.08079	0.0788868	51.7297	0	0		ENSG00000008323	6.56008	4.08079	0.0788868	51.7297	0	0		ENSG00000008323	6.56008	-1.11919	0.384543	-2.91045	0.00360908	0.0138126		ENSG00000008323	6.56008	-1.11919	0.384543	-2.91045	0.00360908	0.0138126
ENSG00000008324	456.51	0.409656	0.104878	3.90604	9.38e-05	0.00065447		ENSG00000008324	456.51	-0.330874	0.0212502	-15.5704	1.15756e-54	2.49779e-54		ENSG00000008324	456.51	-0.330874	0.0212502	-15.5704	1.15756e-54	2.49779e-54		ENSG00000008324	456.51	0.409656	0.104878	3.90604	9.38225e-05	0.000654469		ENSG00000008324	456.51	0.409656	0.104878	3.90604	9.38225e-05	0.000654469
ENSG00000008382	485.942	0.169506	0.159022	1.06593	0.286456	0.445575		ENSG00000008382	485.942	-1.43603	0.0321352	-44.6871	0	0		ENSG00000008382	485.942	-1.43603	0.0321352	-44.6871	0	0		ENSG00000008382	485.942	0.169506	0.159022	1.06593	0.286456	0.445575		ENSG00000008382	485.942	0.169506	0.159022	1.06593	0.286456	0.445575
ENSG00000008394	2005.76	1.03401	0.326776	3.16427	0.00155471	0.00687065		ENSG00000008394	2005.76	-0.29799	0.066073	-4.51001	6.48249e-06	9.3145e-06		ENSG00000008394	2005.76	-0.29799	0.066073	-4.51001	6.48249e-06	9.3145e-06		ENSG00000008394	2005.76	1.03401	0.326776	3.16427	0.00155471	0.00687065		ENSG00000008394	2005.76	1.03401	0.326776	3.16427	0.00155471	0.00687065
ENSG00000008405	744.797	-0.304929	0.229811	-1.32687	0.184552	0.320673		ENSG00000008405	744.797	0.72089	0.046455	15.518	2.61932e-54	5.6414e-54		ENSG00000008405	744.797	0.72089	0.046455	15.518	2.61932e-54	5.6414e-54		ENSG00000008405	744.797	-0.304929	0.229811	-1.32687	0.184552	0.320673		ENSG00000008405	744.797	-0.304929	0.229811	-1.32687	0.184552	0.320673
ENSG00000008438	9.19196	-0.733592	0.340643	-2.15355	0.0312753	0.0806007		ENSG00000008438	9.19196	0.82659	0.0676837	12.2125	2.6647e-34	5.08453e-34		ENSG00000008438	9.19196	0.82659	0.0676837	12.2125	2.6647e-34	5.08453e-34		ENSG00000008438	9.19196	-0.733592	0.340643	-2.15355	0.0312753	0.0806007		ENSG00000008438	9.19196	-0.733592	0.340643	-2.15355	0.0312753	0.0806007
ENSG00000008441	6944.04	0.301246	0.182237	1.65304	0.098322	0.198106		ENSG00000008441	6944.04	0.288121	0.0368443	7.81996	5.28409e-15	8.61471e-15		ENSG00000008441	6944.04	0.288121	0.0368443	7.81996	5.28409e-15	8.61471e-15		ENSG00000008441	6944.04	0.301246	0.182237	1.65304	0.098322	0.198106		ENSG00000008441	6944.04	0.301246	0.182237	1.65304	0.098322	0.198106
ENSG00000008513	710.585	0.249288	0.176588	1.41169	0.158041	0.284739		ENSG00000008513	710.585	0.471952	0.0357135	13.215	7.19264e-40	1.42279e-39		ENSG00000008513	710.585	0.471952	0.0357135	13.215	7.19264e-40	1.42279e-39		ENSG00000008513	710.585	0.249288	0.176588	1.41169	0.158041	0.284739		ENSG00000008513	710.585	0.249288	0.176588	1.41169	0.158041	0.284739
ENSG00000008516	107.686	0.0785227	0.203737	0.385413	0.699931	0.839903		ENSG00000008516	107.686	-0.0497168	0.0411947	-1.20687	0.227481	0.280386		ENSG00000008516	107.686	-0.0497168	0.0411947	-1.20687	0.227481	0.280386		ENSG00000008516	107.686	0.0785227	0.203737	0.385413	0.699931	0.839903		ENSG00000008516	107.686	0.0785227	0.203737	0.385413	0.699931	0.839903
ENSG00000008517	277.904	1.17827	0.361033	3.26361	0.00110004	0.00514142		ENSG00000008517	277.904	0.425467	0.0730387	5.82522	5.70376e-09	8.63787e-09		ENSG00000008517	277.904	0.425467	0.0730387	5.82522	5.70376e-09	8.63787e-09		ENSG00000008517	277.904	1.17827	0.361033	3.26361	0.00110004	0.00514142		ENSG00000008517	277.904	1.17827	0.361033	3.26361	0.00110004	0.00514142
ENSG00000008710	19195.2	-0.531308	0.391471	-1.35721	0.174716	0.307364		ENSG00000008710	19195.2	-2.21361	0.0791401	-27.9707	3.68989e-172	1.29223e-171		ENSG00000008710	19195.2	-2.21361	0.0791401	-27.9707	3.68989e-172	1.29223e-171		ENSG00000008710	19195.2	-0.531308	0.391471	-1.35721	0.174716	0.307364		ENSG00000008710	19195.2	-0.531308	0.391471	-1.35721	0.174716	0.307364
ENSG00000008735	7447.38	0.37384	0.230975	1.61853	0.105548	0.209305		ENSG00000008735	7447.38	-3.05686	0.0466977	-65.4606	0	0		ENSG00000008735	7447.38	-3.05686	0.0466977	-65.4606	0	0		ENSG00000008735	7447.38	0.37384	0.230975	1.61853	0.105548	0.209305		ENSG00000008735	7447.38	0.37384	0.230975	1.61853	0.105548	0.209305
ENSG00000008838	2274.74	0.134297	0.131875	1.01837	0.308503	0.470647		ENSG00000008838	2274.74	-0.00590261	0.0266631	-0.221378	0.824798	0.869793		ENSG00000008838	2274.74	-0.00590261	0.0266631	-0.221378	0.824798	0.869793		ENSG00000008838	2274.74	0.134297	0.131875	1.01837	0.308503	0.470647		ENSG00000008838	2274.74	0.134297	0.131875	1.01837	0.308503	0.470647
ENSG00000008853	2548.84	0.253622	0.291278	0.870723	0.383905	0.552444		ENSG00000008853	2548.84	-1.99707	0.0588871	-33.9135	4.20723e-252	1.89406e-251		ENSG00000008853	2548.84	-1.99707	0.0588871	-33.9135	4.20723e-252	1.89406e-251		ENSG00000008853	2548.84	0.253622	0.291278	0.870723	0.383905	0.552444		ENSG00000008853	2548.84	0.253622	0.291278	0.870723	0.383905	0.552444
ENSG00000008869	1034.75	-0.565564	0.124798	-4.53183	5.85e-06	6.22e-05		ENSG00000008869	1034.75	0.56761	0.0252056	22.5192	2.69136e-112	7.55262e-112		ENSG00000008869	1034.75	0.56761	0.0252056	22.5192	2.69136e-112	7.55262e-112		ENSG00000008869	1034.75	-0.565564	0.124798	-4.53183	5.84749e-06	6.22042e-05		ENSG00000008869	1034.75	-0.565564	0.124798	-4.53183	5.84749e-06	6.22042e-05
ENSG00000008952	5506.83	0.675786	0.136	4.969	6.73e-07	9.93e-06		ENSG00000008952	5506.83	-0.830685	0.0275015	-30.2051	2.02884e-200	7.8029e-200		ENSG00000008952	5506.83	-0.830685	0.0275015	-30.2051	2.02884e-200	7.8029e-200		ENSG00000008952	5506.83	0.675786	0.136	4.969	6.72988e-07	9.93159e-06		ENSG00000008952	5506.83	0.675786	0.136	4.969	6.72988e-07	9.93159e-06
ENSG00000008988	8002.19	0.209798	0.180003	1.16552	0.243807	0.395753		ENSG00000008988	8002.19	0.719401	0.0363923	19.7679	5.62452e-87	1.42062e-86		ENSG00000008988	8002.19	0.719401	0.0363923	19.7679	5.62452e-87	1.42062e-86		ENSG00000008988	8002.19	0.209798	0.180003	1.16552	0.243807	0.395753		ENSG00000008988	8002.19	0.209798	0.180003	1.16552	0.243807	0.395753
ENSG00000009307	9631.7	0.161012	0.107325	1.50023	0.133555	0.2505		ENSG00000009307	9631.7	0.378151	0.021699	17.4272	5.13379e-68	1.18763e-67		ENSG00000009307	9631.7	0.378151	0.021699	17.4272	5.13379e-68	1.18763e-67		ENSG00000009307	9631.7	0.161012	0.107325	1.50023	0.133555	0.2505		ENSG00000009307	9631.7	0.161012	0.107325	1.50023	0.133555	0.2505
ENSG00000009335	1688.92	-0.274946	0.105946	-2.59515	0.00945493	0.0306972		ENSG00000009335	1688.92	1.05201	0.0214177	49.1187	0	0		ENSG00000009335	1688.92	1.05201	0.0214177	49.1187	0	0		ENSG00000009335	1688.92	-0.274946	0.105946	-2.59515	0.00945493	0.0306972		ENSG00000009335	1688.92	-0.274946	0.105946	-2.59515	0.00945493	0.0306972
ENSG00000009413	1596.91	-0.914729	0.246327	-3.71348	0.00020443	0.00125511		ENSG00000009413	1596.91	0.772346	0.0497865	15.5132	2.82532e-54	6.08439e-54		ENSG00000009413	1596.91	0.772346	0.0497865	15.5132	2.82532e-54	6.08439e-54		ENSG00000009413	1596.91	-0.914729	0.246327	-3.71348	0.000204431	0.00125511		ENSG00000009413	1596.91	-0.914729	0.246327	-3.71348	0.000204431	0.00125511
ENSG00000009694	1159.01	-1.3093	0.439851	-2.97669	0.00291374	0.0115581		ENSG00000009694	1159.01	0.101203	0.0888953	1.13846	0.25493	0.312809		ENSG00000009694	1159.01	0.101203	0.0888953	1.13846	0.25493	0.312809		ENSG00000009694	1159.01	-1.3093	0.439851	-2.97669	0.00291374	0.0115581		ENSG00000009694	1159.01	-1.3093	0.439851	-2.97669	0.00291374	0.0115581
ENSG00000009709	40.1317	-0.23168	0.610837	-0.379283	0.704477	0.843424		ENSG00000009709	40.1317	-2.30201	0.122796	-18.7467	2.061e-78	5.00902e-78		ENSG00000009709	40.1317	-2.30201	0.122796	-18.7467	2.061e-78	5.00902e-78		ENSG00000009709	40.1317	-0.23168	0.610837	-0.379283	0.704477	0.843424		ENSG00000009709	40.1317	-0.23168	0.610837	-0.379283	0.704477	0.843424
ENSG00000009724	204.702	-0.738091	0.28628	-2.57821	0.00993141	0.0319509		ENSG00000009724	204.702	-1.13503	0.0575777	-19.713	1.6689e-86	4.20838e-86		ENSG00000009724	204.702	-1.13503	0.0575777	-19.713	1.6689e-86	4.20838e-86		ENSG00000009724	204.702	-0.738091	0.28628	-2.57821	0.00993141	0.0319509		ENSG00000009724	204.702	-0.738091	0.28628	-2.57821	0.00993141	0.0319509
ENSG00000009765	7.7393	-0.95471	0.655492	-1.45648	0.14526	0.266975		ENSG00000009765	7.7393	-2.27177	0.121881	-18.6392	1.54626e-77	3.74216e-77		ENSG00000009765	7.7393	-2.27177	0.121881	-18.6392	1.54626e-77	3.74216e-77		ENSG00000009765	7.7393	-0.95471	0.655492	-1.45648	0.14526	0.266975		ENSG00000009765	7.7393	-0.95471	0.655492	-1.45648	0.14526	0.266975
ENSG00000009780	403.572	0.0186308	0.110363	0.168815	0.865943	0.958553		ENSG00000009780	403.572	0.25714	0.0223148	11.5233	1.00695e-30	1.87561e-30		ENSG00000009780	403.572	0.25714	0.0223148	11.5233	1.00695e-30	1.87561e-30		ENSG00000009780	403.572	0.0186308	0.110363	0.168815	0.865943	0.958553		ENSG00000009780	403.572	0.0186308	0.110363	0.168815	0.865943	0.958553
ENSG00000009790	99.7213	0.182351	0.243376	0.749256	0.453703	0.622502		ENSG00000009790	99.7213	0.0273742	0.0492408	0.555925	0.578262	0.670296		ENSG00000009790	99.7213	0.0273742	0.0492408	0.555925	0.578262	0.670296		ENSG00000009790	99.7213	0.182351	0.243376	0.749256	0.453703	0.622502		ENSG00000009790	99.7213	0.182351	0.243376	0.749256	0.453703	0.622502
ENSG00000009830	1093.12	-0.134845	0.117016	-1.15236	0.249174	0.402197		ENSG00000009830	1093.12	0.293492	0.023651	12.4093	2.32643e-35	4.47268e-35		ENSG00000009830	1093.12	0.293492	0.023651	12.4093	2.32643e-35	4.47268e-35		ENSG00000009830	1093.12	-0.134845	0.117016	-1.15236	0.249174	0.402197		ENSG00000009830	1093.12	-0.134845	0.117016	-1.15236	0.249174	0.402197
ENSG00000009844	984.601	0.191482	0.103664	1.84714	0.0647265	0.143474		ENSG00000009844	984.601	0.515388	0.0209708	24.5765	2.25273e-133	6.85733e-133		ENSG00000009844	984.601	0.515388	0.0209708	24.5765	2.25273e-133	6.85733e-133		ENSG00000009844	984.601	0.191482	0.103664	1.84714	0.0647265	0.143474		ENSG00000009844	984.601	0.191482	0.103664	1.84714	0.0647265	0.143474
ENSG00000009950	1202.78	0.100927	0.327539	0.308139	0.757977	0.8819		ENSG00000009950	1202.78	-3.1178	0.0661913	-47.1029	0	0		ENSG00000009950	1202.78	-3.1178	0.0661913	-47.1029	0	0		ENSG00000009950	1202.78	0.100927	0.327539	0.308139	0.757977	0.881901		ENSG00000009950	1202.78	0.100927	0.327539	0.308139	0.757977	0.881901
ENSG00000009954	2678.45	-0.437101	0.099539	-4.39126	1.13e-05	0.00010842		ENSG00000009954	2678.45	1.03803	0.0201196	51.5928	0	0		ENSG00000009954	2678.45	1.03803	0.0201196	51.5928	0	0		ENSG00000009954	2678.45	-0.437101	0.099539	-4.39126	1.12697e-05	0.000108417		ENSG00000009954	2678.45	-0.437101	0.099539	-4.39126	1.12697e-05	0.000108417
ENSG00000010017	1534.46	0.316269	0.103513	3.05535	0.002248	0.00929179		ENSG00000010017	1534.46	-0.0260665	0.0209383	-1.24492	0.21316	0.263344		ENSG00000010017	1534.46	-0.0260665	0.0209383	-1.24492	0.21316	0.263344		ENSG00000010017	1534.46	0.31627	0.103513	3.05535	0.002248	0.00929179		ENSG00000010017	1534.46	0.31627	0.103513	3.05535	0.002248	0.00929179
ENSG00000010030	35.485	0.210553	0.367448	0.573016	0.566634	0.727677		ENSG00000010030	35.485	1.49087	0.0744403	20.0278	3.15494e-89	8.04398e-89		ENSG00000010030	35.485	1.49087	0.0744403	20.0278	3.15494e-89	8.04398e-89		ENSG00000010030	35.485	0.210553	0.367448	0.573016	0.566634	0.727677		ENSG00000010030	35.485	0.210553	0.367448	0.573016	0.566634	0.727677
ENSG00000010072	204.61	-0.345889	0.101506	-3.40757	0.00065545	0.00334453		ENSG00000010072	204.61	1.27676	0.0205101	62.2504	0	0		ENSG00000010072	204.61	1.27676	0.0205101	62.2504	0	0		ENSG00000010072	204.61	-0.345889	0.101506	-3.40757	0.000655452	0.00334453		ENSG00000010072	204.61	-0.345889	0.101506	-3.40757	0.000655452	0.00334453
ENSG00000010165	607.628	0.0876311	0.0926396	0.945936	0.344181	0.510459		ENSG00000010165	607.628	0.991167	0.0187509	52.8597	0	0		ENSG00000010165	607.628	0.991167	0.0187509	52.8597	0	0		ENSG00000010165	607.628	0.0876311	0.0926396	0.945936	0.344181	0.510459		ENSG00000010165	607.628	0.0876311	0.0926396	0.945936	0.344181	0.510459
ENSG00000010219	448.153	0.0787874	0.112672	0.699263	0.484388	0.651992		ENSG00000010219	448.153	0.454149	0.0227929	19.9251	2.46753e-88	6.271e-88		ENSG00000010219	448.153	0.454149	0.0227929	19.9251	2.46753e-88	6.271e-88		ENSG00000010219	448.153	0.0787874	0.112672	0.699263	0.484388	0.651992		ENSG00000010219	448.153	0.0787874	0.112672	0.699263	0.484388	0.651992
ENSG00000010244	3168.45	-0.102356	0.131606	-0.777743	0.436721	0.605787		ENSG00000010244	3168.45	0.311407	0.0266055	11.7046	1.20725e-31	2.26501e-31		ENSG00000010244	3168.45	0.311407	0.0266055	11.7046	1.20725e-31	2.26501e-31		ENSG00000010244	3168.45	-0.102356	0.131606	-0.777743	0.436721	0.605787		ENSG00000010244	3168.45	-0.102356	0.131606	-0.777743	0.436721	0.605787
ENSG00000010256	3542.01	-0.0087113	0.10863	-0.080193	0.936084	1		ENSG00000010256	3542.01	0.524009	0.0219626	23.8592	8.13095e-126	2.40419e-125		ENSG00000010256	3542.01	0.524009	0.0219626	23.8592	8.13095e-126	2.40419e-125		ENSG00000010256	3542.01	-0.00871135	0.10863	-0.080193	0.936084	1		ENSG00000010256	3542.01	-0.00871135	0.10863	-0.080193	0.936084	1
ENSG00000010270	1283.72	0.0544518	0.135053	0.403187	0.686811	0.830169		ENSG00000010270	1283.72	1.28345	0.0273117	46.9925	0	0		ENSG00000010270	1283.72	1.28345	0.0273117	46.9925	0	0		ENSG00000010270	1283.72	0.0544518	0.135053	0.403187	0.686811	0.830169		ENSG00000010270	1283.72	0.0544518	0.135053	0.403187	0.686811	0.830169
ENSG00000010278	2870.97	0.40497	0.308382	1.31321	0.189112	0.326765		ENSG00000010278	2870.97	1.53941	0.0623484	24.6904	1.3556e-134	4.14492e-134		ENSG00000010278	2870.97	1.53941	0.0623484	24.6904	1.3556e-134	4.14492e-134		ENSG00000010278	2870.97	0.40497	0.308382	1.31321	0.189112	0.326765		ENSG00000010278	2870.97	0.40497	0.308382	1.31321	0.189112	0.326765
ENSG00000010282	2762.31	1.40395	0.368494	3.80997	0.00013898	0.00090581		ENSG00000010282	2762.31	-4.11113	0.0745652	-55.1348	0	0		ENSG00000010282	2762.31	-4.11113	0.0745652	-55.1348	0	0		ENSG00000010282	2762.31	1.40395	0.368494	3.80997	0.000138983	0.000905807		ENSG00000010282	2762.31	1.40395	0.368494	3.80997	0.000138983	0.000905807
ENSG00000010292	894.884	-0.0950359	0.136493	-0.69627	0.48626	0.653833		ENSG00000010292	894.884	1.69461	0.0276054	61.3867	0	0		ENSG00000010292	894.884	1.69461	0.0276054	61.3867	0	0		ENSG00000010292	894.884	-0.0950359	0.136493	-0.69627	0.48626	0.653833		ENSG00000010292	894.884	-0.0950359	0.136493	-0.69627	0.48626	0.653833
ENSG00000010295	1390.85	-0.0034727	0.152968	-0.022702	0.981888	1		ENSG00000010295	1390.85	-0.218434	0.030922	-7.06404	1.61734e-12	2.56297e-12		ENSG00000010295	1390.85	-0.218434	0.030922	-7.06404	1.61734e-12	2.56297e-12		ENSG00000010295	1390.85	-0.00347267	0.152968	-0.022702	0.981888	1		ENSG00000010295	1390.85	-0.00347267	0.152968	-0.022702	0.981888	1
ENSG00000010310	113.063	0.25205	0.391972	0.643032	0.520204	0.685978		ENSG00000010310	113.063	-2.18221	0.0792251	-27.5444	5.16646e-167	1.77692e-166		ENSG00000010310	113.063	-2.18221	0.0792251	-27.5444	5.16646e-167	1.77692e-166		ENSG00000010310	113.063	0.25205	0.391972	0.643032	0.520204	0.685978		ENSG00000010310	113.063	0.25205	0.391972	0.643032	0.520204	0.685978
ENSG00000010318	122.566	-0.266165	0.135785	-1.9602	0.0499726	0.117193		ENSG00000010318	122.566	0.123681	0.0273189	4.52728	5.97466e-06	8.59061e-06		ENSG00000010318	122.566	0.123681	0.0273189	4.52728	5.97466e-06	8.59061e-06		ENSG00000010318	122.566	-0.266165	0.135785	-1.9602	0.0499726	0.117193		ENSG00000010318	122.566	-0.266165	0.135785	-1.9602	0.0499726	0.117193
ENSG00000010319	887.49	0.00371555	0.286613	0.0129637	0.989657	1		ENSG00000010319	887.49	-2.72818	0.0578975	-47.1209	0	0		ENSG00000010319	887.49	-2.72818	0.0578975	-47.1209	0	0		ENSG00000010319	887.49	0.00371555	0.286613	0.0129637	0.989657	1		ENSG00000010319	887.49	0.00371555	0.286613	0.0129637	0.989657	1
ENSG00000010322	8566.36	-0.0162015	0.270842	-0.059819	0.9523	1		ENSG00000010322	8566.36	-1.23506	0.0547547	-22.5563	1.16517e-112	3.27696e-112		ENSG00000010322	8566.36	-1.23506	0.0547547	-22.5563	1.16517e-112	3.27696e-112		ENSG00000010322	8566.36	-0.0162015	0.270842	-0.059819	0.9523	1		ENSG00000010322	8566.36	-0.0162015	0.270842	-0.059819	0.9523	1
ENSG00000010327	2056.02	-0.0992135	0.316903	-0.313072	0.754226	0.878951		ENSG00000010327	2056.02	2.91415	0.0640725	45.4821	0	0		ENSG00000010327	2056.02	2.91415	0.0640725	45.4821	0	0		ENSG00000010327	2056.02	-0.0992135	0.316903	-0.313072	0.754226	0.878951		ENSG00000010327	2056.02	-0.0992135	0.316903	-0.313072	0.754226	0.878951
ENSG00000010361	966.395	0.0755094	0.0996367	0.757847	0.448543	0.617436		ENSG00000010361	966.395	-0.707894	0.020134	-35.1592	8.42171e-271	3.99501e-270		ENSG00000010361	966.395	-0.707894	0.020134	-35.1592	8.42171e-271	3.99501e-270		ENSG00000010361	966.395	0.0755094	0.0996367	0.757847	0.448543	0.617436		ENSG00000010361	966.395	0.0755094	0.0996367	0.757847	0.448543	0.617436
ENSG00000010379	278.844	-0.259647	0.309687	-0.838418	0.401796	0.570878		ENSG00000010379	278.844	-2.54335	0.0623586	-40.7859	0	0		ENSG00000010379	278.844	-2.54335	0.0623586	-40.7859	0	0		ENSG00000010379	278.844	-0.259647	0.309687	-0.838418	0.401796	0.570878		ENSG00000010379	278.844	-0.259647	0.309687	-0.838418	0.401796	0.570878
ENSG00000010404	28058.6	-0.350899	0.264512	-1.32659	0.184644	0.320783		ENSG00000010404	28058.6	-5.35411	0.053451	-100.168	0	0		ENSG00000010404	28058.6	-5.35411	0.053451	-100.168	0	0		ENSG00000010404	28058.6	-0.350899	0.264512	-1.32659	0.184644	0.320783		ENSG00000010404	28058.6	-0.350899	0.264512	-1.32659	0.184644	0.320783
ENSG00000010438	399.366	0.755301	0.331577	2.27791	0.0227321	0.0623658		ENSG00000010438	399.366	-3.51618	0.0672009	-52.3234	0	0		ENSG00000010438	399.366	-3.51618	0.0672009	-52.3234	0	0		ENSG00000010438	399.366	0.755301	0.331577	2.27791	0.0227321	0.0623658		ENSG00000010438	399.366	0.755301	0.331577	2.27791	0.0227321	0.0623658
ENSG00000010539	206.101	-0.224262	0.12298	-1.82356	0.0682185	0.149559		ENSG00000010539	206.101	1.06728	0.0248625	42.9272	0	0		ENSG00000010539	206.101	1.06728	0.0248625	42.9272	0	0		ENSG00000010539	206.101	-0.224262	0.12298	-1.82356	0.0682185	0.149559		ENSG00000010539	206.101	-0.224262	0.12298	-1.82356	0.0682185	0.149559
ENSG00000010610	642.764	0.889917	0.280218	3.1758	0.00149424	0.00664206		ENSG00000010610	642.764	2.07634	0.0566717	36.638	7.10175e-294	3.59236e-293		ENSG00000010610	642.764	2.07634	0.0566717	36.638	7.10175e-294	3.59236e-293		ENSG00000010610	642.764	0.889917	0.280218	3.1758	0.00149424	0.00664206		ENSG00000010610	642.764	0.889917	0.280218	3.1758	0.00149424	0.00664206
ENSG00000010626	626.251	-0.0660123	0.151552	-0.435574	0.663146	0.811203		ENSG00000010626	626.251	-0.0977608	0.0306283	-3.19184	0.00141368	0.00192573		ENSG00000010626	626.251	-0.0977608	0.0306283	-3.19184	0.00141368	0.00192573		ENSG00000010626	626.251	-0.0660123	0.151552	-0.435574	0.663146	0.811203		ENSG00000010626	626.251	-0.0660123	0.151552	-0.435574	0.663146	0.811203
ENSG00000010671	127.751	0.0658667	0.369742	0.178142	0.858611	0.95392		ENSG00000010671	127.751	2.22297	0.0747984	29.7195	4.29639e-194	1.62058e-193		ENSG00000010671	127.751	2.22297	0.0747984	29.7195	4.29639e-194	1.62058e-193		ENSG00000010671	127.751	0.0658667	0.369742	0.178142	0.858611	0.95392		ENSG00000010671	127.751	0.0658667	0.369742	0.178142	0.858611	0.95392
ENSG00000010704	110.026	0.435338	0.24299	1.79159	0.0731992	0.157932		ENSG00000010704	110.026	2.20105	0.0492354	44.7046	0	0		ENSG00000010704	110.026	2.20105	0.0492354	44.7046	0	0		ENSG00000010704	110.026	0.435338	0.24299	1.79159	0.0731992	0.157932		ENSG00000010704	110.026	0.435338	0.24299	1.79159	0.0731992	0.157932
ENSG00000010803	883.794	0.0866936	0.0978718	0.885787	0.375732	0.543934		ENSG00000010803	883.794	0.126395	0.0197914	6.38637	1.6987e-10	2.62714e-10		ENSG00000010803	883.794	0.126395	0.0197914	6.38637	1.6987e-10	2.62714e-10		ENSG00000010803	883.794	0.0866936	0.0978718	0.885787	0.375732	0.543934		ENSG00000010803	883.794	0.0866936	0.0978718	0.885787	0.375732	0.543934
ENSG00000010810	4811.36	0.0488562	0.113063	0.432114	0.665658	0.813343		ENSG00000010810	4811.36	0.728955	0.0228595	31.8884	3.86157e-223	1.59305e-222		ENSG00000010810	4811.36	0.728955	0.0228595	31.8884	3.86157e-223	1.59305e-222		ENSG00000010810	4811.36	0.0488562	0.113063	0.432114	0.665658	0.813343		ENSG00000010810	4811.36	0.0488562	0.113063	0.432114	0.665658	0.813343
ENSG00000010818	2159.45	-0.250858	0.200345	-1.25213	0.210521	0.354634		ENSG00000010818	2159.45	-0.452393	0.0404948	-11.1716	5.61476e-29	1.03251e-28		ENSG00000010818	2159.45	-0.452393	0.0404948	-11.1716	5.61476e-29	1.03251e-28		ENSG00000010818	2159.45	-0.250858	0.200345	-1.25213	0.210521	0.354634		ENSG00000010818	2159.45	-0.250858	0.200345	-1.25213	0.210521	0.354634
ENSG00000010932	7.56797	0.225787	0.320647	0.70416	0.481333	0.649137		ENSG00000010932	7.56797	1.792	0.065724	27.2655	1.08743e-163	3.6975e-163		ENSG00000010932	7.56797	1.792	0.065724	27.2655	1.08743e-163	3.6975e-163		ENSG00000010932	7.56797	0.225787	0.320647	0.70416	0.481333	0.649137		ENSG00000010932	7.56797	0.225787	0.320647	0.70416	0.481333	0.649137
ENSG00000011007	1059.73	-0.0311305	0.088012	-0.353707	0.723558	0.857782		ENSG00000011007	1059.73	0.649303	0.0177972	36.4833	2.03751e-291	1.0238e-290		ENSG00000011007	1059.73	0.649303	0.0177972	36.4833	2.03751e-291	1.0238e-290		ENSG00000011007	1059.73	-0.0311305	0.088012	-0.353707	0.723558	0.857782		ENSG00000011007	1059.73	-0.0311305	0.088012	-0.353707	0.723558	0.857782
ENSG00000011009	879.079	-0.012203	0.121895	-0.100111	0.920256	0.992635		ENSG00000011009	879.079	0.249523	0.0246429	10.1256	4.25465e-24	7.54136e-24		ENSG00000011009	879.079	0.249523	0.0246429	10.1256	4.25465e-24	7.54136e-24		ENSG00000011009	879.079	-0.012203	0.121895	-0.100111	0.920256	0.992635		ENSG00000011009	879.079	-0.012203	0.121895	-0.100111	0.920256	0.992635
ENSG00000011021	2183.48	0.05456	0.107976	0.505297	0.61335	0.768809		ENSG00000011021	2183.48	-0.78367	0.0218241	-35.9085	2.25244e-282	1.10247e-281		ENSG00000011021	2183.48	-0.78367	0.0218241	-35.9085	2.25244e-282	1.10247e-281		ENSG00000011021	2183.48	0.0545601	0.107976	0.505297	0.61335	0.768809		ENSG00000011021	2183.48	0.0545601	0.107976	0.505297	0.61335	0.768809
ENSG00000011028	1373.7	0.574737	0.316758	1.81444	0.0696106	0.152022		ENSG00000011028	1373.7	3.35764	0.0640491	52.4229	0	0		ENSG00000011028	1373.7	3.35764	0.0640491	52.4229	0	0		ENSG00000011028	1373.7	0.574737	0.316758	1.81444	0.0696106	0.152022		ENSG00000011028	1373.7	0.574737	0.316758	1.81444	0.0696106	0.152022
ENSG00000011052	3471.91	0	0.573351	0	1	1		ENSG00000011052	3471.91	-15.1681	0.109618	-138.372	0	0		ENSG00000011052	3471.91	-15.1681	0.109618	-138.372	0	0		ENSG00000011052	3471.91	0	0.573351	0	1	1		ENSG00000011052	3471.91	0	0.573351	0	1	1
ENSG00000011083	1559.87	1.18314	0.523493	2.26008	0.023816	0.0648525		ENSG00000011083	1559.87	-5.28833	0.105991	-49.8942	0	0		ENSG00000011083	1559.87	-5.28833	0.105991	-49.8942	0	0		ENSG00000011083	1559.87	1.18314	0.523493	2.26008	0.023816	0.0648525		ENSG00000011083	1559.87	1.18314	0.523493	2.26008	0.023816	0.0648525
ENSG00000011105	2286.63	1.05738	0.456995	2.31377	0.0206803	0.0578185		ENSG00000011105	2286.63	-1.18015	0.092399	-12.7724	2.33957e-37	4.55745e-37		ENSG00000011105	2286.63	-1.18015	0.092399	-12.7724	2.33957e-37	4.55745e-37		ENSG00000011105	2286.63	1.05738	0.456995	2.31377	0.0206803	0.0578185		ENSG00000011105	2286.63	1.05738	0.456995	2.31377	0.0206803	0.0578185
ENSG00000011114	667.714	-0.09495	0.111361	-0.852634	0.393863	0.56302		ENSG00000011114	667.714	0.677723	0.0225147	30.1013	4.65411e-199	1.78232e-198		ENSG00000011114	667.714	0.677723	0.0225147	30.1013	4.65411e-199	1.78232e-198		ENSG00000011114	667.714	-0.09495	0.111361	-0.852634	0.393863	0.56302		ENSG00000011114	667.714	-0.09495	0.111361	-0.852634	0.393863	0.56302
ENSG00000011132	443.168	0.0502037	0.152119	0.33003	0.741377	0.870305		ENSG00000011132	443.168	0.38685	0.030761	12.576	2.86315e-36	5.53754e-36		ENSG00000011132	443.168	0.38685	0.030761	12.576	2.86315e-36	5.53754e-36		ENSG00000011132	443.168	0.0502037	0.152119	0.33003	0.741377	0.870305		ENSG00000011132	443.168	0.0502037	0.152119	0.33003	0.741377	0.870305
ENSG00000011143	320.427	-0.209181	0.105552	-1.98179	0.0475026	0.112502		ENSG00000011143	320.427	0.89907	0.0213335	42.1436	0	0		ENSG00000011143	320.427	0.89907	0.0213335	42.1436	0	0		ENSG00000011143	320.427	-0.209181	0.105552	-1.98179	0.0475026	0.112502		ENSG00000011143	320.427	-0.209181	0.105552	-1.98179	0.0475026	0.112502
ENSG00000011198	329.157	-0.0792468	0.201528	-0.39323	0.694149	0.835464		ENSG00000011198	329.157	2.31725	0.0407734	56.8323	0	0		ENSG00000011198	329.157	2.31725	0.0407734	56.8323	0	0		ENSG00000011198	329.157	-0.0792468	0.201528	-0.39323	0.694149	0.835464		ENSG00000011198	329.157	-0.0792468	0.201528	-0.39323	0.694149	0.835464
ENSG00000011201	814.998	-0.081625	0.332855	-0.245227	0.806281	0.91703		ENSG00000011201	814.998	1.91303	0.0672992	28.4257	9.73021e-178	3.47003e-177		ENSG00000011201	814.998	1.91303	0.0672992	28.4257	9.73021e-178	3.47003e-177		ENSG00000011201	814.998	-0.081625	0.332855	-0.245227	0.806281	0.91703		ENSG00000011201	814.998	-0.081625	0.332855	-0.245227	0.806281	0.91703
ENSG00000011243	3102.27	-0.422339	0.186837	-2.26047	0.0237919	0.0647989		ENSG00000011243	3102.27	-1.57905	0.0377477	-41.8317	0	0		ENSG00000011243	3102.27	-1.57905	0.0377477	-41.8317	0	0		ENSG00000011243	3102.27	-0.422339	0.186837	-2.26047	0.0237919	0.0647989		ENSG00000011243	3102.27	-0.422339	0.186837	-2.26047	0.0237919	0.0647989
ENSG00000011258	621.045	-0.329652	0.175455	-1.87885	0.0602655	0.135648		ENSG00000011258	621.045	0.27373	0.0354509	7.72138	1.15074e-14	1.8689e-14		ENSG00000011258	621.045	0.27373	0.0354509	7.72138	1.15074e-14	1.8689e-14		ENSG00000011258	621.045	-0.329652	0.175455	-1.87885	0.0602655	0.135648		ENSG00000011258	621.045	-0.329652	0.175455	-1.87885	0.0602655	0.135648
ENSG00000011260	669.148	0.0928056	0.101502	0.914324	0.360547	0.5282		ENSG00000011260	669.148	0.965157	0.0205389	46.9917	0	0		ENSG00000011260	669.148	0.965157	0.0205389	46.9917	0	0		ENSG00000011260	669.148	0.0928056	0.101502	0.914324	0.360547	0.528201		ENSG00000011260	669.148	0.0928056	0.101502	0.914324	0.360547	0.528201
ENSG00000011275	1672.95	-0.370307	0.0778322	-4.75776	1.96e-06	2.49e-05		ENSG00000011275	1672.95	1.28221	0.015733	81.4983	0	0		ENSG00000011275	1672.95	1.28221	0.015733	81.4983	0	0		ENSG00000011275	1672.95	-0.370307	0.0778322	-4.75776	1.95748e-06	2.48571e-05		ENSG00000011275	1672.95	-0.370307	0.0778322	-4.75776	1.95748e-06	2.48571e-05
ENSG00000011295	1895.24	0.0190685	0.113348	0.168229	0.866403	0.958774		ENSG00000011295	1895.24	-0.249861	0.0229128	-10.9049	1.09223e-27	1.98884e-27		ENSG00000011295	1895.24	-0.249861	0.0229128	-10.9049	1.09223e-27	1.98884e-27		ENSG00000011295	1895.24	0.0190685	0.113348	0.168229	0.866403	0.958774		ENSG00000011295	1895.24	0.0190685	0.113348	0.168229	0.866403	0.958774
ENSG00000011304	2101.73	0.313273	0.150187	2.08588	0.0369892	0.0921925		ENSG00000011304	2101.73	1.34685	0.0303704	44.3476	0	0		ENSG00000011304	2101.73	1.34685	0.0303704	44.3476	0	0		ENSG00000011304	2101.73	0.313273	0.150187	2.08588	0.0369892	0.0921925		ENSG00000011304	2101.73	0.313273	0.150187	2.08588	0.0369892	0.0921925
ENSG00000011332	820.469	-0.237834	0.24046	-0.98908	0.322624	0.486576		ENSG00000011332	820.469	-0.455727	0.0485949	-9.37809	6.71783e-21	1.16029e-20		ENSG00000011332	820.469	-0.455727	0.0485949	-9.37809	6.71783e-21	1.16029e-20		ENSG00000011332	820.469	-0.237834	0.24046	-0.98908	0.322624	0.486576		ENSG00000011332	820.469	-0.237834	0.24046	-0.98908	0.322624	0.486576
ENSG00000011347	3088.6	1.03442	0.345533	2.99369	0.00275625	0.0110187		ENSG00000011347	3088.6	-2.63259	0.0698746	-37.6759	0	0		ENSG00000011347	3088.6	-2.63259	0.0698746	-37.6759	0	0		ENSG00000011347	3088.6	1.03442	0.345533	2.99369	0.00275625	0.0110187		ENSG00000011347	3088.6	1.03442	0.345533	2.99369	0.00275625	0.0110187
ENSG00000011376	948.429	-0.529902	0.152229	-3.48094	0.00049965	0.00266337		ENSG00000011376	948.429	0.770141	0.0307601	25.037	2.41595e-138	7.49685e-138		ENSG00000011376	948.429	0.770141	0.0307601	25.037	2.41595e-138	7.49685e-138		ENSG00000011376	948.429	-0.529902	0.152229	-3.48094	0.000499649	0.00266337		ENSG00000011376	948.429	-0.529902	0.152229	-3.48094	0.000499649	0.00266337
ENSG00000011405	2136.01	-0.629008	0.179524	-3.50375	0.00045875	0.00247379		ENSG00000011405	2136.01	0.498939	0.036284	13.7509	5.02847e-43	1.01508e-42		ENSG00000011405	2136.01	0.498939	0.036284	13.7509	5.02847e-43	1.01508e-42		ENSG00000011405	2136.01	-0.629008	0.179524	-3.50375	0.000458749	0.00247379		ENSG00000011405	2136.01	-0.629008	0.179524	-3.50375	0.000458749	0.00247379
ENSG00000011422	286.21	0.674665	0.363021	1.85847	0.0631017	0.140658		ENSG00000011422	286.21	2.52531	0.0734261	34.3925	3.25886e-259	1.49813e-258		ENSG00000011422	286.21	2.52531	0.0734261	34.3925	3.25886e-259	1.49813e-258		ENSG00000011422	286.21	0.674665	0.363021	1.85847	0.0631017	0.140658		ENSG00000011422	286.21	0.674665	0.363021	1.85847	0.0631017	0.140658
ENSG00000011426	3291.13	0.385411	0.441701	0.87256	0.382903	0.551307		ENSG00000011426	3291.13	-1.17478	0.0893002	-13.1554	1.58341e-39	3.12518e-39		ENSG00000011426	3291.13	-1.17478	0.0893002	-13.1554	1.58341e-39	3.12518e-39		ENSG00000011426	3291.13	0.385411	0.441701	0.87256	0.382903	0.551307		ENSG00000011426	3291.13	0.385411	0.441701	0.87256	0.382903	0.551307
ENSG00000011451	1943.08	0.516953	0.163694	3.15805	0.0015883	0.00698547		ENSG00000011451	1943.08	-0.481355	0.0331038	-14.5408	6.68304e-48	1.38798e-47		ENSG00000011451	1943.08	-0.481355	0.0331038	-14.5408	6.68304e-48	1.38798e-47		ENSG00000011451	1943.08	0.516953	0.163694	3.15805	0.0015883	0.00698547		ENSG00000011451	1943.08	0.516953	0.163694	3.15805	0.0015883	0.00698547
ENSG00000011454	2632.19	-0.115127	0.0895789	-1.2852	0.198722	0.339299		ENSG00000011454	2632.19	-0.0531219	0.0181044	-2.93419	0.00334415	0.00450371		ENSG00000011454	2632.19	-0.0531219	0.0181044	-2.93419	0.00334415	0.00450371		ENSG00000011454	2632.19	-0.115127	0.0895789	-1.2852	0.198722	0.339299		ENSG00000011454	2632.19	-0.115127	0.0895789	-1.2852	0.198722	0.339299
ENSG00000011465	2222.03	0.255016	0.303047	0.841507	0.400064	0.569231		ENSG00000011465	2222.03	1.7428	0.0612704	28.4444	5.7214e-178	2.04255e-177		ENSG00000011465	2222.03	1.7428	0.0612704	28.4444	5.7214e-178	2.04255e-177		ENSG00000011465	2222.03	0.255016	0.303047	0.841507	0.400064	0.569231		ENSG00000011465	2222.03	0.255016	0.303047	0.841507	0.400064	0.569231
ENSG00000011478	267.191	0.625961	0.129688	4.82666	1.39e-06	1.84e-05		ENSG00000011478	267.191	0.368707	0.0263101	14.0139	1.2821e-44	2.61192e-44		ENSG00000011478	267.191	0.368707	0.0263101	14.0139	1.2821e-44	2.61192e-44		ENSG00000011478	267.191	0.625961	0.129688	4.82666	1.38842e-06	1.84498e-05		ENSG00000011478	267.191	0.625961	0.129688	4.82666	1.38842e-06	1.84498e-05
ENSG00000011485	1771.8	-0.0365448	0.111211	-0.328608	0.742452	0.871015		ENSG00000011485	1771.8	0.221331	0.0224822	9.84472	7.22411e-23	1.26771e-22		ENSG00000011485	1771.8	0.221331	0.0224822	9.84472	7.22411e-23	1.26771e-22		ENSG00000011485	1771.8	-0.0365448	0.111211	-0.328608	0.742452	0.871015		ENSG00000011485	1771.8	-0.0365448	0.111211	-0.328608	0.742452	0.871015
ENSG00000011523	1293.19	-0.30226	0.113132	-2.67175	0.00754576	0.0254943		ENSG00000011523	1293.19	-0.0228736	0.022852	-1.00095	0.316853	0.384965		ENSG00000011523	1293.19	-0.0228736	0.022852	-1.00095	0.316853	0.384965		ENSG00000011523	1293.19	-0.30226	0.113132	-2.67175	0.00754576	0.0254943		ENSG00000011523	1293.19	-0.30226	0.113132	-2.67175	0.00754576	0.0254943
ENSG00000011566	980.245	-0.328441	0.140677	-2.33471	0.0195584	0.0553163		ENSG00000011566	980.245	0.417239	0.0284272	14.6775	8.98695e-49	1.87611e-48		ENSG00000011566	980.245	0.417239	0.0284272	14.6775	8.98695e-49	1.87611e-48		ENSG00000011566	980.245	-0.328441	0.140677	-2.33471	0.0195584	0.0553163		ENSG00000011566	980.245	-0.328441	0.140677	-2.33471	0.0195584	0.0553163
ENSG00000011590	14.7224	-2.1512	0.305998	-7.03011	2.06e-12	1.68e-10		ENSG00000011590	14.7224	2.31528	0.0599624	38.6121	0	0		ENSG00000011590	14.7224	2.31528	0.0599624	38.6121	0	0		ENSG00000011590	14.7224	-2.1512	0.305998	-7.03011	2.06365e-12	1.68033e-10		ENSG00000011590	14.7224	-2.1512	0.305998	-7.03011	2.06365e-12	1.68033e-10
ENSG00000011600	597.121	0.730797	0.382252	1.91182	0.0558995	0.127991		ENSG00000011600	597.121	2.72427	0.0772966	35.2443	4.1917e-272	1.9965e-271		ENSG00000011600	597.121	2.72427	0.0772966	35.2443	4.1917e-272	1.9965e-271		ENSG00000011600	597.121	0.730797	0.382252	1.91182	0.0558995	0.127991		ENSG00000011600	597.121	0.730797	0.382252	1.91182	0.0558995	0.127991
ENSG00000011638	369.206	0.128168	0.369957	0.346441	0.729011	0.861418		ENSG00000011638	369.206	-0.0259359	0.074798	-0.346745	0.728783	0.804711		ENSG00000011638	369.206	-0.0259359	0.074798	-0.346745	0.728783	0.804711		ENSG00000011638	369.206	0.128168	0.369957	0.346441	0.729011	0.861418		ENSG00000011638	369.206	0.128168	0.369957	0.346441	0.729011	0.861418
ENSG00000011677	464.718	-0.196952	0.413761	-0.476004	0.634071	0.786654		ENSG00000011677	464.718	-1.01641	0.0836212	-12.1549	5.4012e-34	1.02818e-33		ENSG00000011677	464.718	-1.01641	0.0836212	-12.1549	5.4012e-34	1.02818e-33		ENSG00000011677	464.718	-0.196952	0.413761	-0.476004	0.634071	0.786654		ENSG00000011677	464.718	-0.196952	0.413761	-0.476004	0.634071	0.786654
ENSG00000012048	242.26	-0.569464	0.207133	-2.74927	0.0059729	0.0210349		ENSG00000012048	242.26	2.24933	0.0418875	53.6994	0	0		ENSG00000012048	242.26	2.24933	0.0418875	53.6994	0	0		ENSG00000012048	242.26	-0.569464	0.207133	-2.74927	0.0059729	0.0210349		ENSG00000012048	242.26	-0.569464	0.207133	-2.74927	0.0059729	0.0210349
ENSG00000012061	1780.35	-0.0913807	0.076763	-1.19043	0.233879	0.383667		ENSG00000012061	1780.35	0.171214	0.0155139	11.0362	2.55696e-28	4.67852e-28		ENSG00000012061	1780.35	0.171214	0.0155139	11.0362	2.55696e-28	4.67852e-28		ENSG00000012061	1780.35	-0.0913807	0.076763	-1.19043	0.233879	0.383667		ENSG00000012061	1780.35	-0.0913807	0.076763	-1.19043	0.233879	0.383667
ENSG00000012124	1218.31	0.791602	0.409918	1.93112	0.0534678	0.123599		ENSG00000012124	1218.31	-4.20108	0.0829477	-50.6474	0	0		ENSG00000012124	1218.31	-4.20108	0.0829477	-50.6474	0	0		ENSG00000012124	1218.31	0.791602	0.409918	1.93112	0.0534678	0.123599		ENSG00000012124	1218.31	0.791602	0.409918	1.93112	0.0534678	0.123599
ENSG00000012171	3525.62	0.583797	0.328935	1.77481	0.0759294	0.162312		ENSG00000012171	3525.62	-1.69114	0.0665056	-25.4286	1.21691e-142	3.84028e-142		ENSG00000012171	3525.62	-1.69114	0.0665056	-25.4286	1.21691e-142	3.84028e-142		ENSG00000012171	3525.62	0.583797	0.328935	1.77481	0.0759294	0.162312		ENSG00000012171	3525.62	0.583797	0.328935	1.77481	0.0759294	0.162312
ENSG00000012174	447.902	0.21168	0.148042	1.42986	0.152756	0.277179		ENSG00000012174	447.902	0.913037	0.0299547	30.4806	4.71788e-204	1.83453e-203		ENSG00000012174	447.902	0.913037	0.0299547	30.4806	4.71788e-204	1.83453e-203		ENSG00000012174	447.902	0.21168	0.148042	1.42986	0.152756	0.277179		ENSG00000012174	447.902	0.21168	0.148042	1.42986	0.152756	0.277179
ENSG00000012211	78.2162	0.511194	0.20946	2.44054	0.0146655	0.0439417		ENSG00000012211	78.2162	0.76994	0.0425088	18.1125	2.53967e-73	6.02869e-73		ENSG00000012211	78.2162	0.76994	0.0425088	18.1125	2.53967e-73	6.02869e-73		ENSG00000012211	78.2162	0.511194	0.20946	2.44054	0.0146655	0.0439417		ENSG00000012211	78.2162	0.511194	0.20946	2.44054	0.0146655	0.0439417
ENSG00000012223	1983.76	1.25004	0.495583	2.52235	0.0116572	0.0365229		ENSG00000012223	1983.76	7.4027	0.100236	73.8528	0	0		ENSG00000012223	1983.76	7.4027	0.100236	73.8528	0	0		ENSG00000012223	1983.76	1.25004	0.495583	2.52235	0.0116572	0.0365229		ENSG00000012223	1983.76	1.25004	0.495583	2.52235	0.0116572	0.0365229
ENSG00000012232	2256.68	-0.0462212	0.115923	-0.398722	0.690098	0.832521		ENSG00000012232	2256.68	1.13402	0.0234395	48.3805	0	0		ENSG00000012232	2256.68	1.13402	0.0234395	48.3805	0	0		ENSG00000012232	2256.68	-0.0462212	0.115923	-0.398722	0.690098	0.832521		ENSG00000012232	2256.68	-0.0462212	0.115923	-0.398722	0.690098	0.832521
ENSG00000012504	3.18633	-2.42557	0.605799	-4.00393	6.23e-05	0.00046023		ENSG00000012504	3.18633	1.80642	0.114359	15.796	3.31672e-56	7.22503e-56		ENSG00000012504	3.18633	1.80642	0.114359	15.796	3.31672e-56	7.22503e-56		ENSG00000012504	3.18633	-2.42558	0.605799	-4.00393	6.22999e-05	0.000460233		ENSG00000012504	3.18633	-2.42558	0.605799	-4.00393	6.22999e-05	0.000460233
ENSG00000012660	2505.26	0.272005	0.20315	1.33894	0.180592	0.315432		ENSG00000012660	2505.26	0.706407	0.0410745	17.1982	2.73936e-66	6.27968e-66		ENSG00000012660	2505.26	0.706407	0.0410745	17.1982	2.73936e-66	6.27968e-66		ENSG00000012660	2505.26	0.272005	0.20315	1.33894	0.180592	0.315432		ENSG00000012660	2505.26	0.272005	0.20315	1.33894	0.180592	0.315432
ENSG00000012779	509.428	0.62013	0.400983	1.54653	0.121978	0.233731		ENSG00000012779	509.428	0.829881	0.0810815	10.2351	1.37982e-24	2.45542e-24		ENSG00000012779	509.428	0.829881	0.0810815	10.2351	1.37982e-24	2.45542e-24		ENSG00000012779	509.428	0.62013	0.400983	1.54653	0.121978	0.233731		ENSG00000012779	509.428	0.62013	0.400983	1.54653	0.121978	0.233731
ENSG00000012817	1237.7	-0.625232	0.607226	-1.02965	0.303173	0.464767		ENSG00000012817	1237.7	-0.432517	0.122751	-3.52352	0.000425856	0.000588241		ENSG00000012817	1237.7	-0.432517	0.122751	-3.52352	0.000425856	0.000588241		ENSG00000012817	1237.7	-0.625232	0.607226	-1.02965	0.303173	0.464767		ENSG00000012817	1237.7	-0.625232	0.607226	-1.02965	0.303173	0.464767
ENSG00000012822	4385.76	-0.173649	0.177527	-0.978154	0.327998	0.492523		ENSG00000012822	4385.76	-0.840025	0.035885	-23.4088	3.47636e-121	1.01037e-120		ENSG00000012822	4385.76	-0.840025	0.035885	-23.4088	3.47636e-121	1.01037e-120		ENSG00000012822	4385.76	-0.173649	0.177527	-0.978153	0.327998	0.492523		ENSG00000012822	4385.76	-0.173649	0.177527	-0.978153	0.327998	0.492523
ENSG00000012963	1230.42	0.227586	0.0889392	2.55889	0.0105007	0.03346		ENSG00000012963	1230.42	0.482866	0.0179944	26.8342	1.28967e-158	4.30436e-158		ENSG00000012963	1230.42	0.482866	0.0179944	26.8342	1.28967e-158	4.30436e-158		ENSG00000012963	1230.42	0.227586	0.0889392	2.55889	0.0105007	0.03346		ENSG00000012963	1230.42	0.227586	0.0889392	2.55889	0.0105007	0.03346
ENSG00000012983	1545.31	-0.143734	0.150031	-0.958025	0.33805	0.503728		ENSG00000012983	1545.31	-0.540233	0.0303192	-17.8181	5.11036e-71	1.19986e-70		ENSG00000012983	1545.31	-0.540233	0.0303192	-17.8181	5.11036e-71	1.19986e-70		ENSG00000012983	1545.31	-0.143734	0.150031	-0.958025	0.33805	0.503728		ENSG00000012983	1545.31	-0.143734	0.150031	-0.958025	0.33805	0.503728
ENSG00000013016	2065	0.209303	0.224026	0.934277	0.350161	0.51706		ENSG00000013016	2065	-1.1848	0.0452913	-26.1596	7.66363e-151	2.48822e-150		ENSG00000013016	2065	-1.1848	0.0452913	-26.1596	7.66363e-151	2.48822e-150		ENSG00000013016	2065	0.209303	0.224026	0.934277	0.350161	0.51706		ENSG00000013016	2065	0.209303	0.224026	0.934277	0.350161	0.51706
ENSG00000013275	1532.98	0.0172549	0.0760841	0.226787	0.820589	0.927461		ENSG00000013275	1532.98	1.2522	0.0153924	81.3521	0	0		ENSG00000013275	1532.98	1.2522	0.0153924	81.3521	0	0		ENSG00000013275	1532.98	0.0172549	0.0760841	0.226787	0.820589	0.927461		ENSG00000013275	1532.98	0.0172549	0.0760841	0.226787	0.820589	0.927461
ENSG00000013288	1356.1	0.239562	0.212864	1.12542	0.26041	0.415597		ENSG00000013288	1356.1	0.444576	0.0430401	10.3293	5.19129e-25	9.26996e-25		ENSG00000013288	1356.1	0.444576	0.0430401	10.3293	5.19129e-25	9.26996e-25		ENSG00000013288	1356.1	0.239562	0.212864	1.12542	0.26041	0.415597		ENSG00000013288	1356.1	0.239562	0.212864	1.12542	0.26041	0.415597
ENSG00000013293	1216.44	0.567995	0.274656	2.06802	0.0386379	0.0954057		ENSG00000013293	1216.44	-1.69065	0.0555429	-30.4385	1.69877e-203	6.59444e-203		ENSG00000013293	1216.44	-1.69065	0.0555429	-30.4385	1.69877e-203	6.59444e-203		ENSG00000013293	1216.44	0.567995	0.274656	2.06802	0.0386379	0.0954057		ENSG00000013293	1216.44	0.567995	0.274656	2.06802	0.0386379	0.0954057
ENSG00000013297	3137.13	1.39508	0.421417	3.31045	0.00093145	0.00447941		ENSG00000013297	3137.13	-1.72906	0.0852092	-20.292	1.5135e-91	3.89785e-91		ENSG00000013297	3137.13	-1.72906	0.0852092	-20.292	1.5135e-91	3.89785e-91		ENSG00000013297	3137.13	1.39508	0.421417	3.31045	0.000931453	0.00447941		ENSG00000013297	3137.13	1.39508	0.421417	3.31045	0.000931453	0.00447941
ENSG00000013306	1997.19	0.234988	0.0983316	2.38975	0.01686	0.0491235		ENSG00000013306	1997.19	0.360067	0.0198871	18.1055	2.88204e-73	6.83973e-73		ENSG00000013306	1997.19	0.360067	0.0198871	18.1055	2.88204e-73	6.83973e-73		ENSG00000013306	1997.19	0.234988	0.0983316	2.38975	0.01686	0.0491235		ENSG00000013306	1997.19	0.234988	0.0983316	2.38975	0.01686	0.0491235
ENSG00000013364	1458.19	0.532801	0.2147	2.48161	0.013079	0.040088		ENSG00000013364	1458.19	1.04226	0.0434147	24.0072	2.33972e-127	6.95833e-127		ENSG00000013364	1458.19	1.04226	0.0434147	24.0072	2.33972e-127	6.95833e-127		ENSG00000013364	1458.19	0.532801	0.2147	2.48161	0.013079	0.040088		ENSG00000013364	1458.19	0.532801	0.2147	2.48161	0.013079	0.040088
ENSG00000013374	1330.57	0.133919	0.0872183	1.53545	0.124673	0.237697		ENSG00000013374	1330.57	0.406611	0.0176412	23.0489	1.50846e-117	4.32895e-117		ENSG00000013374	1330.57	0.406611	0.0176412	23.0489	1.50846e-117	4.32895e-117		ENSG00000013374	1330.57	0.133919	0.0872183	1.53545	0.124673	0.237697		ENSG00000013374	1330.57	0.133919	0.0872183	1.53545	0.124673	0.237697
ENSG00000013375	1421.08	-0.0685334	0.104356	-0.656725	0.511358	0.677795		ENSG00000013375	1421.08	-0.0252145	0.0210915	-1.19548	0.231901	0.285606		ENSG00000013375	1421.08	-0.0252145	0.0210915	-1.19548	0.231901	0.285606		ENSG00000013375	1421.08	-0.0685334	0.104356	-0.656725	0.511358	0.677795		ENSG00000013375	1421.08	-0.0685334	0.104356	-0.656725	0.511358	0.677795
ENSG00000013392	426.085	0.323933	0.128372	2.52339	0.0116228	0.0364489		ENSG00000013392	426.085	-0.0862111	0.0259849	-3.31774	0.0009075	0.00124233		ENSG00000013392	426.085	-0.0862111	0.0259849	-3.31774	0.0009075	0.00124233		ENSG00000013392	426.085	0.323933	0.128372	2.52339	0.0116228	0.0364489		ENSG00000013392	426.085	0.323933	0.128372	2.52339	0.0116228	0.0364489
ENSG00000013441	4425.14	-0.21226	0.165732	-1.28075	0.200283	0.341408		ENSG00000013441	4425.14	-1.39582	0.0334951	-41.6724	0	0		ENSG00000013441	4425.14	-1.39582	0.0334951	-41.6724	0	0		ENSG00000013441	4425.14	-0.21226	0.165732	-1.28075	0.200283	0.341408		ENSG00000013441	4425.14	-0.21226	0.165732	-1.28075	0.200283	0.341408
ENSG00000013503	261.79	-0.510424	0.107301	-4.75694	1.97e-06	2.49e-05		ENSG00000013503	261.79	0.933646	0.0216291	43.1662	0	0		ENSG00000013503	261.79	0.933646	0.0216291	43.1662	0	0		ENSG00000013503	261.79	-0.510424	0.107301	-4.75694	1.96546e-06	2.49469e-05		ENSG00000013503	261.79	-0.510424	0.107301	-4.75694	1.96546e-06	2.49469e-05
ENSG00000013523	1282.32	-0.0707708	0.111383	-0.635385	0.525178	0.690637		ENSG00000013523	1282.32	-0.307346	0.0225075	-13.6553	1.87737e-42	3.77361e-42		ENSG00000013523	1282.32	-0.307346	0.0225075	-13.6553	1.87737e-42	3.77361e-42		ENSG00000013523	1282.32	-0.0707708	0.111383	-0.635384	0.525178	0.690637		ENSG00000013523	1282.32	-0.0707708	0.111383	-0.635384	0.525178	0.690637
ENSG00000013561	1601.64	0.249789	0.0969948	2.57528	0.0100159	0.0321629		ENSG00000013561	1601.64	0.368647	0.0196193	18.79	9.11991e-79	2.21987e-78		ENSG00000013561	1601.64	0.368647	0.0196193	18.79	9.11991e-79	2.21987e-78		ENSG00000013561	1601.64	0.249789	0.0969948	2.57528	0.0100159	0.0321629		ENSG00000013561	1601.64	0.249789	0.0969948	2.57528	0.0100159	0.0321629
ENSG00000013563	531.042	0.197775	0.135269	1.46208	0.143718	0.264815		ENSG00000013563	531.042	-1.4886	0.0273369	-54.4538	0	0		ENSG00000013563	531.042	-1.4886	0.0273369	-54.4538	0	0		ENSG00000013563	531.042	0.197775	0.135269	1.46208	0.143718	0.264815		ENSG00000013563	531.042	0.197775	0.135269	1.46208	0.143718	0.264815
ENSG00000013573	483.991	-0.533265	0.281252	-1.89604	0.0579549	0.131678		ENSG00000013573	483.991	0.599701	0.0568398	10.5507	5.04015e-26	9.07031e-26		ENSG00000013573	483.991	0.599701	0.0568398	10.5507	5.04015e-26	9.07031e-26		ENSG00000013573	483.991	-0.533265	0.281252	-1.89604	0.0579548	0.131678		ENSG00000013573	483.991	-0.533265	0.281252	-1.89604	0.0579548	0.131678
ENSG00000013583	765.114	0.692714	0.160812	4.3076	1.65e-05	0.00014913		ENSG00000013583	765.114	-0.334423	0.0325444	-10.2759	9.04999e-25	1.61307e-24		ENSG00000013583	765.114	-0.334423	0.0325444	-10.2759	9.04999e-25	1.61307e-24		ENSG00000013583	765.114	0.692714	0.160812	4.3076	1.65036e-05	0.000149128		ENSG00000013583	765.114	0.692714	0.160812	4.3076	1.65036e-05	0.000149128
ENSG00000013588	97.9553	0.799557	0.507143	1.57659	0.11489	0.223346		ENSG00000013588	97.9553	1.95879	0.102598	19.0918	2.95337e-81	7.27516e-81		ENSG00000013588	97.9553	1.95879	0.102598	19.0918	2.95337e-81	7.27516e-81		ENSG00000013588	97.9553	0.799557	0.507143	1.57659	0.11489	0.223346		ENSG00000013588	97.9553	0.799557	0.507143	1.57659	0.11489	0.223346
ENSG00000013619	652.446	0.10165	0.174946	0.581034	0.561218	0.722755		ENSG00000013619	652.446	-0.124836	0.0353709	-3.52933	0.000416617	0.000575618		ENSG00000013619	652.446	-0.124836	0.0353709	-3.52933	0.000416617	0.000575618		ENSG00000013619	652.446	0.10165	0.174946	0.581034	0.561218	0.722755		ENSG00000013619	652.446	0.10165	0.174946	0.581034	0.561218	0.722755
ENSG00000013725	49.4282	1.07208	0.322595	3.3233	0.0008896	0.00431676		ENSG00000013725	49.4282	-0.0762977	0.0655545	-1.16388	0.244472	0.300425		ENSG00000013725	49.4282	-0.0762977	0.0655545	-1.16388	0.244472	0.300425		ENSG00000013725	49.4282	1.07208	0.322595	3.3233	0.000889595	0.00431676		ENSG00000013725	49.4282	1.07208	0.322595	3.3233	0.000889595	0.00431676
ENSG00000013810	349.615	-0.50231	0.192876	-2.60431	0.00920583	0.0300702		ENSG00000013810	349.615	2.85235	0.0390201	73.0994	0	0		ENSG00000013810	349.615	2.85235	0.0390201	73.0994	0	0		ENSG00000013810	349.615	-0.50231	0.192876	-2.60431	0.00920583	0.0300702		ENSG00000013810	349.615	-0.50231	0.192876	-2.60431	0.00920583	0.0300702
ENSG00000014123	827.054	0.111218	0.149542	0.743721	0.457045	0.625782		ENSG00000014123	827.054	0.336328	0.0302392	11.1223	9.77731e-29	1.79464e-28		ENSG00000014123	827.054	0.336328	0.0302392	11.1223	9.77731e-29	1.79464e-28		ENSG00000014123	827.054	0.111218	0.149542	0.743721	0.457045	0.625782		ENSG00000014123	827.054	0.111218	0.149542	0.743721	0.457045	0.625782
ENSG00000014138	241.319	-0.167134	0.144061	-1.16017	0.245981	0.398299		ENSG00000014138	241.319	-0.75422	0.0290094	-25.9992	5.05812e-149	1.63174e-148		ENSG00000014138	241.319	-0.75422	0.0290094	-25.9992	5.05812e-149	1.63174e-148		ENSG00000014138	241.319	-0.167134	0.144061	-1.16017	0.245981	0.398299		ENSG00000014138	241.319	-0.167134	0.144061	-1.16017	0.245981	0.398299
ENSG00000014164	587.495	0.209786	0.120995	1.73384	0.0829473	0.173905		ENSG00000014164	587.495	-0.0713988	0.024476	-2.91709	0.00353312	0.0047543		ENSG00000014164	587.495	-0.0713988	0.024476	-2.91709	0.00353312	0.0047543		ENSG00000014164	587.495	0.209786	0.120995	1.73384	0.0829473	0.173905		ENSG00000014164	587.495	0.209786	0.120995	1.73384	0.0829473	0.173905
ENSG00000014216	2472.65	0.165879	0.127651	1.29947	0.193782	0.332916		ENSG00000014216	2472.65	0.446511	0.025811	17.2992	4.76659e-67	1.09676e-66		ENSG00000014216	2472.65	0.446511	0.025811	17.2992	4.76659e-67	1.09676e-66		ENSG00000014216	2472.65	0.165879	0.127651	1.29947	0.193782	0.332916		ENSG00000014216	2472.65	0.165879	0.127651	1.29947	0.193782	0.332916
ENSG00000014257	22.044	0.133183	0.440703	0.302207	0.762494	0.885076		ENSG00000014257	22.044	2.69398	0.0893913	30.1369	1.59208e-199	6.10472e-199		ENSG00000014257	22.044	2.69398	0.0893913	30.1369	1.59208e-199	6.10472e-199		ENSG00000014257	22.044	0.133183	0.440703	0.302207	0.762494	0.885076		ENSG00000014257	22.044	0.133183	0.440703	0.302207	0.762494	0.885076
ENSG00000014641	7207.45	0.404356	0.208634	1.93811	0.0526092	0.122102		ENSG00000014641	7207.45	-1.00526	0.0421811	-23.8319	1.55997e-125	4.60666e-125		ENSG00000014641	7207.45	-1.00526	0.0421811	-23.8319	1.55997e-125	4.60666e-125		ENSG00000014641	7207.45	0.404356	0.208634	1.93811	0.0526092	0.122102		ENSG00000014641	7207.45	0.404356	0.208634	1.93811	0.0526092	0.122102
ENSG00000014824	2197.9	0.072701	0.106044	0.685574	0.492982	0.660192		ENSG00000014824	2197.9	0.105313	0.0214402	4.91195	9.01749e-07	1.31779e-06		ENSG00000014824	2197.9	0.105313	0.0214402	4.91195	9.01749e-07	1.31779e-06		ENSG00000014824	2197.9	0.0727009	0.106044	0.685574	0.492982	0.660192		ENSG00000014824	2197.9	0.0727009	0.106044	0.685574	0.492982	0.660192
ENSG00000014914	384.161	0.16763	0.176451	0.950008	0.342108	0.508253		ENSG00000014914	384.161	1.1251	0.0356973	31.5179	4.9396e-218	2.00663e-217		ENSG00000014914	384.161	1.1251	0.0356973	31.5179	4.9396e-218	2.00663e-217		ENSG00000014914	384.161	0.16763	0.176451	0.950008	0.342108	0.508253		ENSG00000014914	384.161	0.16763	0.176451	0.950008	0.342108	0.508253
ENSG00000014919	830.515	0.078512	0.083523	0.940005	0.347215	0.51383		ENSG00000014919	830.515	-0.41263	0.0168801	-24.4447	5.72427e-132	1.73191e-131		ENSG00000014919	830.515	-0.41263	0.0168801	-24.4447	5.72427e-132	1.73191e-131		ENSG00000014919	830.515	0.078512	0.083523	0.940005	0.347215	0.51383		ENSG00000014919	830.515	0.078512	0.083523	0.940005	0.347215	0.51383
ENSG00000015133	737.32	-0.316981	0.401305	-0.789876	0.4296	0.598836		ENSG00000015133	737.32	-1.10618	0.0811044	-13.6389	2.35046e-42	4.72205e-42		ENSG00000015133	737.32	-1.10618	0.0811044	-13.6389	2.35046e-42	4.72205e-42		ENSG00000015133	737.32	-0.316981	0.401305	-0.789876	0.4296	0.598836		ENSG00000015133	737.32	-0.316981	0.401305	-0.789876	0.4296	0.598836
ENSG00000015153	695.294	-0.0714922	0.102773	-0.695632	0.486659	0.654171		ENSG00000015153	695.294	0.488853	0.0207765	23.5291	2.05267e-122	5.99137e-122		ENSG00000015153	695.294	0.488853	0.0207765	23.5291	2.05267e-122	5.99137e-122		ENSG00000015153	695.294	-0.0714922	0.102773	-0.695632	0.486659	0.654171		ENSG00000015153	695.294	-0.0714922	0.102773	-0.695632	0.486659	0.654171
ENSG00000015171	3902.44	0.0792525	0.102768	0.771178	0.440602	0.609692		ENSG00000015171	3902.44	-1.10067	0.0207724	-52.9872	0	0		ENSG00000015171	3902.44	-1.10067	0.0207724	-52.9872	0	0		ENSG00000015171	3902.44	0.0792525	0.102768	0.771178	0.440602	0.609692		ENSG00000015171	3902.44	0.0792525	0.102768	0.771178	0.440602	0.609692
ENSG00000015285	192.603	0.778164	0.273339	2.84689	0.0044149	0.0163223		ENSG00000015285	192.603	1.47094	0.055324	26.5878	9.40061e-156	3.10379e-155		ENSG00000015285	192.603	1.47094	0.055324	26.5878	9.40061e-156	3.10379e-155		ENSG00000015285	192.603	0.778164	0.273339	2.84689	0.0044149	0.0163223		ENSG00000015285	192.603	0.778164	0.273339	2.84689	0.0044149	0.0163223
ENSG00000015413	37.8821	-1.78622	0.604254	-2.95608	0.0031158	0.0122232		ENSG00000015413	37.8821	4.37973	0.122247	35.8268	4.23082e-281	2.06481e-280		ENSG00000015413	37.8821	4.37973	0.122247	35.8268	4.23082e-281	2.06481e-280		ENSG00000015413	37.8821	-1.78622	0.604254	-2.95608	0.0031158	0.0122232		ENSG00000015413	37.8821	-1.78622	0.604254	-2.95608	0.0031158	0.0122232
ENSG00000015475	1253.54	-0.0843616	0.115651	-0.72945	0.465727	0.6342		ENSG00000015475	1253.54	0.170468	0.0233765	7.29227	3.04786e-13	4.86764e-13		ENSG00000015475	1253.54	0.170468	0.0233765	7.29227	3.04786e-13	4.86764e-13		ENSG00000015475	1253.54	-0.0843616	0.115651	-0.72945	0.465727	0.6342		ENSG00000015475	1253.54	-0.0843616	0.115651	-0.72945	0.465727	0.6342
ENSG00000015479	9105.54	-1.58593	0.168504	-9.41184	4.88e-21	2.83e-18		ENSG00000015479	9105.54	-5.54816	0.0334259	-165.984	0	0		ENSG00000015479	9105.54	-5.54816	0.0334259	-165.984	0	0		ENSG00000015479	9105.54	-1.58593	0.168504	-9.41184	4.87537e-21	2.82585e-18		ENSG00000015479	9105.54	-1.58593	0.168504	-9.41184	4.87537e-21	2.82585e-18
ENSG00000015520	24.2225	-0.292828	0.522774	-0.560143	0.575382	0.735069		ENSG00000015520	24.2225	-0.877844	0.105185	-8.34568	7.0805e-17	1.17727e-16		ENSG00000015520	24.2225	-0.877844	0.105185	-8.34568	7.0805e-17	1.17727e-16		ENSG00000015520	24.2225	-0.292828	0.522774	-0.560143	0.575382	0.735069		ENSG00000015520	24.2225	-0.292828	0.522774	-0.560143	0.575382	0.735069
ENSG00000015532	671.534	-0.102891	0.130451	-0.788735	0.430267	0.599459		ENSG00000015532	671.534	0.704728	0.0263741	26.7205	2.72015e-157	9.02834e-157		ENSG00000015532	671.534	0.704728	0.0263741	26.7205	2.72015e-157	9.02834e-157		ENSG00000015532	671.534	-0.102891	0.130451	-0.788735	0.430267	0.599459		ENSG00000015532	671.534	-0.102891	0.130451	-0.788735	0.430267	0.599459
ENSG00000015568	700.978	-1.82543	0.242578	-7.52514	5.27e-14	6.97e-12		ENSG00000015568	700.978	-5.06894	0.0437243	-115.929	0	0		ENSG00000015568	700.978	-5.06894	0.0437243	-115.929	0	0		ENSG00000015568	700.978	-1.82543	0.242578	-7.52514	5.26639e-14	6.96666e-12		ENSG00000015568	700.978	-1.82543	0.242578	-7.52514	5.26639e-14	6.96666e-12
ENSG00000015592	3376.55	0.465395	0.257103	1.81015	0.070273	0.153126		ENSG00000015592	3376.55	-1.82065	0.051983	-35.0239	9.72111e-269	4.58338e-268		ENSG00000015592	3376.55	-1.82065	0.051983	-35.0239	9.72111e-269	4.58338e-268		ENSG00000015592	3376.55	0.465395	0.257103	1.81015	0.070273	0.153126		ENSG00000015592	3376.55	0.465395	0.257103	1.81015	0.070273	0.153126
ENSG00000015676	4881.63	0.00813565	0.119976	0.0678106	0.945936	1		ENSG00000015676	4881.63	0.118973	0.0242554	4.905	9.34297e-07	1.36498e-06		ENSG00000015676	4881.63	0.118973	0.0242554	4.905	9.34297e-07	1.36498e-06		ENSG00000015676	4881.63	0.00813565	0.119976	0.0678106	0.945936	1		ENSG00000015676	4881.63	0.00813565	0.119976	0.0678106	0.945936	1
ENSG00000016082	42.1396	-0.605075	1.15118	-0.525613	0.599157	0.756394		ENSG00000016082	42.1396	-4.39578	0.229717	-19.1356	1.27663e-81	3.15004e-81		ENSG00000016082	42.1396	-4.39578	0.229717	-19.1356	1.27663e-81	3.15004e-81		ENSG00000016082	42.1396	-0.605075	1.15118	-0.525613	0.599157	0.756394		ENSG00000016082	42.1396	-0.605075	1.15118	-0.525613	0.599157	0.756394
ENSG00000016391	1334.79	-0.648684	0.176625	-3.67266	0.00024004	0.00143921		ENSG00000016391	1334.79	-0.503763	0.0356678	-14.1237	2.71193e-45	5.54844e-45		ENSG00000016391	1334.79	-0.503763	0.0356678	-14.1237	2.71193e-45	5.54844e-45		ENSG00000016391	1334.79	-0.648684	0.176625	-3.67266	0.000240038	0.00143921		ENSG00000016391	1334.79	-0.648684	0.176625	-3.67266	0.000240038	0.00143921
ENSG00000016402	173.702	0.42968	0.274226	1.56688	0.117142	0.226694		ENSG00000016402	173.702	-1.34196	0.0554984	-24.1802	3.59853e-129	1.07729e-128		ENSG00000016402	173.702	-1.34196	0.0554984	-24.1802	3.59853e-129	1.07729e-128		ENSG00000016402	173.702	0.42968	0.274226	1.56688	0.117142	0.226694		ENSG00000016402	173.702	0.42968	0.274226	1.56688	0.117142	0.226694
ENSG00000016490	1.71239	-1.05173	0.7255	-1.44966	0.147154	0.269567		ENSG00000016490	1.71239	-1.31834	0.123745	-10.6537	1.67658e-26	3.02782e-26		ENSG00000016490	1.71239	-1.31834	0.123745	-10.6537	1.67658e-26	3.02782e-26		ENSG00000016490	1.71239	-1.05173	0.7255	-1.44966	0.147154	0.269567		ENSG00000016490	1.71239	-1.05173	0.7255	-1.44966	0.147154	0.269567
ENSG00000016602	202.633	1.10168	0.425307	2.59031	0.00958892	0.0310475		ENSG00000016602	202.633	-3.2576	0.0863352	-37.7321	0	0		ENSG00000016602	202.633	-3.2576	0.0863352	-37.7321	0	0		ENSG00000016602	202.633	1.10168	0.425307	2.59031	0.00958892	0.0310475		ENSG00000016602	202.633	1.10168	0.425307	2.59031	0.00958892	0.0310475
ENSG00000016864	1120.2	0.070334	0.0637194	1.10381	0.269676	0.426553		ENSG00000016864	1120.2	0.89769	0.0128973	69.6029	0	0		ENSG00000016864	1120.2	0.89769	0.0128973	69.6029	0	0		ENSG00000016864	1120.2	0.0703341	0.0637194	1.10381	0.269676	0.426553		ENSG00000016864	1120.2	0.0703341	0.0637194	1.10381	0.269676	0.426553
ENSG00000017260	3007.26	0.191955	0.0923526	2.0785	0.0376629	0.0935337		ENSG00000017260	3007.26	0.0297012	0.0186745	1.59046	0.11173	0.140969		ENSG00000017260	3007.26	0.0297012	0.0186745	1.59046	0.11173	0.140969		ENSG00000017260	3007.26	0.191955	0.0923526	2.0785	0.0376629	0.0935337		ENSG00000017260	3007.26	0.191955	0.0923526	2.0785	0.0376629	0.0935337
ENSG00000017427	72.8746	0.507487	0.363531	1.39599	0.162716	0.291162		ENSG00000017427	72.8746	-1.59858	0.0736466	-21.7061	1.79497e-104	4.8781e-104		ENSG00000017427	72.8746	-1.59858	0.0736466	-21.7061	1.79497e-104	4.8781e-104		ENSG00000017427	72.8746	0.507487	0.363531	1.39599	0.162716	0.291162		ENSG00000017427	72.8746	0.507487	0.363531	1.39599	0.162716	0.291162
ENSG00000017483	854.992	-0.514755	0.263305	-1.95498	0.0505859	0.118341		ENSG00000017483	854.992	1.04754	0.0532256	19.6812	3.12777e-86	7.88093e-86		ENSG00000017483	854.992	1.04754	0.0532256	19.6812	3.12777e-86	7.88093e-86		ENSG00000017483	854.992	-0.514755	0.263305	-1.95498	0.0505859	0.118341		ENSG00000017483	854.992	-0.514755	0.263305	-1.95498	0.0505859	0.118341
ENSG00000017797	2131.96	0.0565199	0.0975612	0.579328	0.562368	0.723634		ENSG00000017797	2131.96	0.201522	0.0197255	10.2163	1.67551e-24	2.98033e-24		ENSG00000017797	2131.96	0.201522	0.0197255	10.2163	1.67551e-24	2.98033e-24		ENSG00000017797	2131.96	0.0565199	0.0975612	0.579328	0.562368	0.723634		ENSG00000017797	2131.96	0.0565199	0.0975612	0.579328	0.562368	0.723634
ENSG00000018189	4345.32	-0.265611	0.117369	-2.26304	0.0236335	0.0644391		ENSG00000018189	4345.32	-0.0604405	0.0237233	-2.54773	0.0108427	0.0143515		ENSG00000018189	4345.32	-0.0604405	0.0237233	-2.54773	0.0108427	0.0143515		ENSG00000018189	4345.32	-0.265611	0.117369	-2.26304	0.0236335	0.0644391		ENSG00000018189	4345.32	-0.265611	0.117369	-2.26304	0.0236335	0.0644391
ENSG00000018236	5056.83	-0.994659	0.22407	-4.43905	9.04e-06	8.99e-05		ENSG00000018236	5056.83	-0.221644	0.045289	-4.894	9.88084e-07	1.44267e-06		ENSG00000018236	5056.83	-0.221644	0.045289	-4.894	9.88084e-07	1.44267e-06		ENSG00000018236	5056.83	-0.994659	0.22407	-4.43904	9.03589e-06	8.99092e-05		ENSG00000018236	5056.83	-0.994659	0.22407	-4.43904	9.03589e-06	8.99092e-05
ENSG00000018280	918.444	0.00851708	0.501865	0.0169708	0.98646	1		ENSG00000018280	918.444	1.80162	0.101466	17.7559	1.55044e-70	3.63061e-70		ENSG00000018280	918.444	1.80162	0.101466	17.7559	1.55044e-70	3.63061e-70		ENSG00000018280	918.444	0.00851708	0.501865	0.0169708	0.98646	1		ENSG00000018280	918.444	0.00851708	0.501865	0.0169708	0.98646	1
ENSG00000018408	1478.75	0.645266	0.296567	2.17578	0.0295715	0.0771487		ENSG00000018408	1478.75	1.69604	0.0599641	28.2842	5.41212e-176	1.91877e-175		ENSG00000018408	1478.75	1.69604	0.0599641	28.2842	5.41212e-176	1.91877e-175		ENSG00000018408	1478.75	0.645266	0.296567	2.17578	0.0295715	0.0771487		ENSG00000018408	1478.75	0.645266	0.296567	2.17578	0.0295715	0.0771487
ENSG00000018510	873.185	0.00455556	0.136882	0.0332808	0.973451	1		ENSG00000018510	873.185	0.827472	0.0276798	29.8945	2.32177e-196	8.81496e-196		ENSG00000018510	873.185	0.827472	0.0276798	29.8945	2.32177e-196	8.81496e-196		ENSG00000018510	873.185	0.00455556	0.136882	0.0332808	0.973451	1		ENSG00000018510	873.185	0.00455556	0.136882	0.0332808	0.973451	1
ENSG00000018607	3.26681	-0.019045	0.277059	-0.06874	0.945197	1		ENSG00000018607	3.26681	1.74818	0.0575572	30.3729	1.25312e-202	4.85167e-202		ENSG00000018607	3.26681	1.74818	0.0575572	30.3729	1.25312e-202	4.85167e-202		ENSG00000018607	3.26681	-0.019045	0.277059	-0.06874	0.945197	1		ENSG00000018607	3.26681	-0.019045	0.277059	-0.06874	0.945197	1
ENSG00000018610	481.579	0.120951	0.0937943	1.28953	0.197214	0.337344		ENSG00000018610	481.579	0.598281	0.0189855	31.5126	5.839e-218	2.37099e-217		ENSG00000018610	481.579	0.598281	0.0189855	31.5126	5.839e-218	2.37099e-217		ENSG00000018610	481.579	0.120951	0.0937943	1.28953	0.197214	0.337344		ENSG00000018610	481.579	0.120951	0.0937943	1.28953	0.197214	0.337344
ENSG00000018625	32160.9	-0.586233	0.30013	-1.95326	0.0507884	0.118726		ENSG00000018625	32160.9	-0.979689	0.060676	-16.1462	1.20703e-58	2.66167e-58		ENSG00000018625	32160.9	-0.979689	0.060676	-16.1462	1.20703e-58	2.66167e-58		ENSG00000018625	32160.9	-0.586233	0.30013	-1.95326	0.0507884	0.118726		ENSG00000018625	32160.9	-0.586233	0.30013	-1.95326	0.0507884	0.118726
ENSG00000018699	204.986	-0.236628	0.0980557	-2.4132	0.0158133	0.0466448		ENSG00000018699	204.986	1.74494	0.0198673	87.8297	0	0		ENSG00000018699	204.986	1.74494	0.0198673	87.8297	0	0		ENSG00000018699	204.986	-0.236628	0.0980557	-2.4132	0.0158133	0.0466448		ENSG00000018699	204.986	-0.236628	0.0980557	-2.4132	0.0158133	0.0466448
ENSG00000018869	141.485	-0.221279	0.0973569	-2.27287	0.0230341	0.0630429		ENSG00000018869	141.485	0.350765	0.0195849	17.9099	9.86477e-72	2.32231e-71		ENSG00000018869	141.485	0.350765	0.0195849	17.9099	9.86477e-72	2.32231e-71		ENSG00000018869	141.485	-0.22128	0.0973569	-2.27287	0.0230341	0.0630429		ENSG00000018869	141.485	-0.22128	0.0973569	-2.27287	0.0230341	0.0630429
ENSG00000019102	48.5835	-0.0271919	0.282481	-0.0962611	0.923313	0.994615		ENSG00000019102	48.5835	-1.03233	0.0568805	-18.1492	1.30397e-73	3.09988e-73		ENSG00000019102	48.5835	-1.03233	0.0568805	-18.1492	1.30397e-73	3.09988e-73		ENSG00000019102	48.5835	-0.0271919	0.282481	-0.0962611	0.923313	0.994615		ENSG00000019102	48.5835	-0.0271919	0.282481	-0.0962611	0.923313	0.994615
ENSG00000019144	7147.82	-0.283077	0.212275	-1.33354	0.182355	0.317884		ENSG00000019144	7147.82	-0.942022	0.0429113	-21.9528	8.14646e-107	2.23604e-106		ENSG00000019144	7147.82	-0.942022	0.0429113	-21.9528	8.14646e-107	2.23604e-106		ENSG00000019144	7147.82	-0.283077	0.212275	-1.33354	0.182355	0.317884		ENSG00000019144	7147.82	-0.283077	0.212275	-1.33354	0.182355	0.317884
ENSG00000019169	53.7067	1.19058	0.498091	2.39029	0.0168351	0.0490609		ENSG00000019169	53.7067	3.3719	0.100885	33.4232	6.31666e-245	2.78262e-244		ENSG00000019169	53.7067	3.3719	0.100885	33.4232	6.31666e-245	2.78262e-244		ENSG00000019169	53.7067	1.19058	0.498091	2.39029	0.0168351	0.0490609		ENSG00000019169	53.7067	1.19058	0.498091	2.39029	0.0168351	0.0490609
ENSG00000019186	16.8504	-0.135368	0.468967	-0.288652	0.772848	0.893037		ENSG00000019186	16.8504	-0.00739859	0.0946277	-0.0781863	0.93768	0.945303		ENSG00000019186	16.8504	-0.00739859	0.0946277	-0.0781863	0.93768	0.945303		ENSG00000019186	16.8504	-0.135368	0.468967	-0.288651	0.772848	0.893037		ENSG00000019186	16.8504	-0.135368	0.468967	-0.288651	0.772848	0.893037
ENSG00000019485	665.865	-0.234959	0.147919	-1.58843	0.11219	0.219219		ENSG00000019485	665.865	-0.707229	0.0298572	-23.6871	4.90243e-124	1.43927e-123		ENSG00000019485	665.865	-0.707229	0.0298572	-23.6871	4.90243e-124	1.43927e-123		ENSG00000019485	665.865	-0.234959	0.147919	-1.58843	0.11219	0.219219		ENSG00000019485	665.865	-0.234959	0.147919	-1.58843	0.11219	0.219219
ENSG00000019505	1855.48	0.890794	0.418978	2.12611	0.0334939	0.0851772		ENSG00000019505	1855.48	-2.80185	0.0847281	-33.0688	8.36257e-240	3.63067e-239		ENSG00000019505	1855.48	-2.80185	0.0847281	-33.0688	8.36257e-240	3.63067e-239		ENSG00000019505	1855.48	0.890794	0.418978	2.12611	0.0334939	0.0851772		ENSG00000019505	1855.48	0.890794	0.418978	2.12611	0.0334939	0.0851772
ENSG00000019549	99.5485	1.30029	0.34155	3.80703	0.00014064	0.000915		ENSG00000019549	99.5485	2.22307	0.069172	32.1382	1.28954e-226	5.38096e-226		ENSG00000019549	99.5485	2.22307	0.069172	32.1382	1.28954e-226	5.38096e-226		ENSG00000019549	99.5485	1.30029	0.34155	3.80703	0.000140643	0.000915		ENSG00000019549	99.5485	1.30029	0.34155	3.80703	0.000140643	0.000915
ENSG00000019582	10828.3	0.944568	0.393768	2.39879	0.0164493	0.0481403		ENSG00000019582	10828.3	2.56008	0.0796091	32.1581	6.79711e-227	2.83895e-226		ENSG00000019582	10828.3	2.56008	0.0796091	32.1581	6.79711e-227	2.83895e-226		ENSG00000019582	10828.3	0.944568	0.393768	2.39879	0.0164493	0.0481402		ENSG00000019582	10828.3	0.944568	0.393768	2.39879	0.0164493	0.0481402
ENSG00000019991	155.706	-0.124788	0.413737	-0.301613	0.762947	0.885387		ENSG00000019991	155.706	2.17827	0.0836725	26.0333	2.07856e-149	6.71484e-149		ENSG00000019991	155.706	2.17827	0.0836725	26.0333	2.07856e-149	6.71484e-149		ENSG00000019991	155.706	-0.124788	0.413737	-0.301613	0.762947	0.885387		ENSG00000019991	155.706	-0.124788	0.413737	-0.301613	0.762947	0.885387
ENSG00000019995	1944.16	-0.0428504	0.129806	-0.330111	0.741316	0.870305		ENSG00000019995	1944.16	-2.57649	0.0261931	-98.3649	0	0		ENSG00000019995	1944.16	-2.57649	0.0261931	-98.3649	0	0		ENSG00000019995	1944.16	-0.0428504	0.129806	-0.330111	0.741316	0.870305		ENSG00000019995	1944.16	-0.0428504	0.129806	-0.330111	0.741316	0.870305
ENSG00000020129	21355.7	0.614757	0.324504	1.89445	0.0581652	0.132031		ENSG00000020129	21355.7	-3.18924	0.0656069	-48.6114	0	0		ENSG00000020129	21355.7	-3.18924	0.0656069	-48.6114	0	0		ENSG00000020129	21355.7	0.614757	0.324504	1.89445	0.0581652	0.132031		ENSG00000020129	21355.7	0.614757	0.324504	1.89445	0.0581652	0.132031
ENSG00000020181	828.805	0.711983	0.175687	4.05257	5.07e-05	0.00038568		ENSG00000020181	828.805	-0.625291	0.0355501	-17.589	2.99165e-69	6.96511e-69		ENSG00000020181	828.805	-0.625291	0.0355501	-17.589	2.99165e-69	6.96511e-69		ENSG00000020181	828.805	0.711983	0.175687	4.05257	5.06577e-05	0.000385676		ENSG00000020181	828.805	0.711983	0.175687	4.05257	5.06577e-05	0.000385676
ENSG00000020219	1.35728	-1.3519	0.440306	-3.07036	0.00213802	0.00891619		ENSG00000020219	1.35728	1.32668	0.0776537	17.0846	1.93352e-65	4.41441e-65		ENSG00000020219	1.35728	1.32668	0.0776537	17.0846	1.93352e-65	4.41441e-65		ENSG00000020219	1.35728	-1.3519	0.440306	-3.07036	0.00213802	0.00891619		ENSG00000020219	1.35728	-1.3519	0.440306	-3.07036	0.00213802	0.00891619
ENSG00000020256	295.105	0.0212608	0.0964865	0.22035	0.825598	0.931235		ENSG00000020256	295.105	1.08505	0.0195434	55.5198	0	0		ENSG00000020256	295.105	1.08505	0.0195434	55.5198	0	0		ENSG00000020256	295.105	0.0212608	0.0964865	0.22035	0.825598	0.931235		ENSG00000020256	295.105	0.0212608	0.0964865	0.22035	0.825598	0.931235
ENSG00000020426	381.263	-0.339165	0.0858125	-3.95239	7.74e-05	0.00055547		ENSG00000020426	381.263	-0.177862	0.0172311	-10.3221	5.59623e-25	9.99026e-25		ENSG00000020426	381.263	-0.177862	0.0172311	-10.3221	5.59623e-25	9.99026e-25		ENSG00000020426	381.263	-0.339165	0.0858125	-3.95239	7.73731e-05	0.00055547		ENSG00000020426	381.263	-0.339165	0.0858125	-3.95239	7.73731e-05	0.00055547
ENSG00000020577	2684.58	-0.297885	0.285596	-1.04303	0.296934	0.457576		ENSG00000020577	2684.58	0.0127761	0.0577354	0.221287	0.824869	0.869852		ENSG00000020577	2684.58	0.0127761	0.0577354	0.221287	0.824869	0.869852		ENSG00000020577	2684.58	-0.297885	0.285596	-1.04303	0.296934	0.457576		ENSG00000020577	2684.58	-0.297885	0.285596	-1.04303	0.296934	0.457576
ENSG00000020633	70.2742	0.832565	0.32241	2.58231	0.00981403	0.0316508		ENSG00000020633	70.2742	1.2929	0.0653338	19.7891	3.69456e-87	9.34308e-87		ENSG00000020633	70.2742	1.2929	0.0653338	19.7891	3.69456e-87	9.34308e-87		ENSG00000020633	70.2742	0.832565	0.32241	2.58231	0.00981403	0.0316508		ENSG00000020633	70.2742	0.832565	0.32241	2.58231	0.00981403	0.0316508
ENSG00000020922	510.953	-0.224838	0.131322	-1.71212	0.0868753	0.180227		ENSG00000020922	510.953	0.407964	0.0265318	15.3764	2.35533e-53	5.0484e-53		ENSG00000020922	510.953	0.407964	0.0265318	15.3764	2.35533e-53	5.0484e-53		ENSG00000020922	510.953	-0.224838	0.131322	-1.71212	0.0868753	0.180227		ENSG00000020922	510.953	-0.224838	0.131322	-1.71212	0.0868753	0.180227
ENSG00000021300	28211.3	0.551974	0.318779	1.73153	0.0833575	0.174582		ENSG00000021300	28211.3	-2.47073	0.0644483	-38.3366	0	0		ENSG00000021300	28211.3	-2.47073	0.0644483	-38.3366	0	0		ENSG00000021300	28211.3	0.551974	0.318779	1.73153	0.0833575	0.174582		ENSG00000021300	28211.3	0.551974	0.318779	1.73153	0.0833575	0.174582
ENSG00000021355	593.221	0.627663	0.228487	2.74704	0.0060135	0.0211514		ENSG00000021355	593.221	0.941258	0.0462155	20.3667	3.29975e-92	8.52144e-92		ENSG00000021355	593.221	0.941258	0.0462155	20.3667	3.29975e-92	8.52144e-92		ENSG00000021355	593.221	0.627663	0.228487	2.74704	0.0060135	0.0211514		ENSG00000021355	593.221	0.627663	0.228487	2.74704	0.0060135	0.0211514
ENSG00000021461	5.89345	0.0351897	0.284965	0.123488	0.901721	0.981921		ENSG00000021461	5.89345	0.69099	0.0579552	11.9228	8.99976e-33	1.69963e-32		ENSG00000021461	5.89345	0.69099	0.0579552	11.9228	8.99976e-33	1.69963e-32		ENSG00000021461	5.89345	0.0351897	0.284965	0.123488	0.901721	0.981921		ENSG00000021461	5.89345	0.0351897	0.284965	0.123488	0.901721	0.981921
ENSG00000021488	38.7154	-0.682006	0.27885	-2.44578	0.0144538	0.0434022		ENSG00000021488	38.7154	-0.919705	0.0550857	-16.6959	1.40415e-62	3.16006e-62		ENSG00000021488	38.7154	-0.919705	0.0550857	-16.6959	1.40415e-62	3.16006e-62		ENSG00000021488	38.7154	-0.682006	0.27885	-2.44578	0.0144538	0.0434022		ENSG00000021488	38.7154	-0.682006	0.27885	-2.44578	0.0144538	0.0434022
ENSG00000021574	865.07	-0.190441	0.113321	-1.68054	0.0928532	0.189692		ENSG00000021574	865.07	0.447645	0.0229013	19.5467	4.39745e-85	1.10124e-84		ENSG00000021574	865.07	0.447645	0.0229013	19.5467	4.39745e-85	1.10124e-84		ENSG00000021574	865.07	-0.19044	0.113321	-1.68054	0.0928532	0.189692		ENSG00000021574	865.07	-0.19044	0.113321	-1.68054	0.0928532	0.189692
ENSG00000021645	2910.24	0.405554	0.351236	1.15465	0.248234	0.401077		ENSG00000021645	2910.24	-2.68804	0.0710128	-37.8529	0	0		ENSG00000021645	2910.24	-2.68804	0.0710128	-37.8529	0	0		ENSG00000021645	2910.24	0.405554	0.351236	1.15465	0.248234	0.401077		ENSG00000021645	2910.24	0.405554	0.351236	1.15465	0.248234	0.401077
ENSG00000021762	656.451	0.16952	0.151085	1.12202	0.261854	0.417312		ENSG00000021762	656.451	0.512184	0.0305572	16.7615	4.66855e-63	1.05414e-62		ENSG00000021762	656.451	0.512184	0.0305572	16.7615	4.66855e-63	1.05414e-62		ENSG00000021762	656.451	0.16952	0.151085	1.12202	0.261854	0.417312		ENSG00000021762	656.451	0.16952	0.151085	1.12202	0.261854	0.417312
ENSG00000021776	998.215	-0.423544	0.102755	-4.12189	3.76e-05	0.00030032		ENSG00000021776	998.215	1.09071	0.0207649	52.5264	0	0		ENSG00000021776	998.215	1.09071	0.0207649	52.5264	0	0		ENSG00000021776	998.215	-0.423544	0.102755	-4.12189	3.75784e-05	0.000300321		ENSG00000021776	998.215	-0.423544	0.102755	-4.12189	3.75784e-05	0.000300321
ENSG00000021826	266.966	-0.314446	0.356633	-0.881708	0.377935	0.546369		ENSG00000021826	266.966	1.06785	0.0720961	14.8115	1.23485e-49	2.5901e-49		ENSG00000021826	266.966	1.06785	0.0720961	14.8115	1.23485e-49	2.5901e-49		ENSG00000021826	266.966	-0.314446	0.356633	-0.881708	0.377935	0.546369		ENSG00000021826	266.966	-0.314446	0.356633	-0.881708	0.377935	0.546369
ENSG00000021852	0.725224	-0.16541	0.797021	-0.207536	0.835592	0.937724		ENSG00000021852	0.725224	-0.521655	0.155298	-3.35905	0.000782111	0.00107247		ENSG00000021852	0.725224	-0.521655	0.155298	-3.35905	0.000782111	0.00107247		ENSG00000021852	0.725224	-0.16541	0.797021	-0.207536	0.835592	0.937724		ENSG00000021852	0.725224	-0.16541	0.797021	-0.207536	0.835592	0.937724
ENSG00000022267	5771.9	-0.048814	0.141049	-0.346078	0.729284	0.861672		ENSG00000022267	5771.9	0.582127	0.0285162	20.4139	1.25734e-92	3.25213e-92		ENSG00000022267	5771.9	0.582127	0.0285162	20.4139	1.25734e-92	3.25213e-92		ENSG00000022267	5771.9	-0.048814	0.141049	-0.346078	0.729284	0.861672		ENSG00000022267	5771.9	-0.048814	0.141049	-0.346078	0.729284	0.861672
ENSG00000022277	2839.37	0.270201	0.108131	2.49884	0.01246	0.0385577		ENSG00000022277	2839.37	-0.163205	0.0218653	-7.46411	8.38619e-14	1.34905e-13		ENSG00000022277	2839.37	-0.163205	0.0218653	-7.46411	8.38619e-14	1.34905e-13		ENSG00000022277	2839.37	0.270201	0.108131	2.49884	0.01246	0.0385577		ENSG00000022277	2839.37	0.270201	0.108131	2.49884	0.01246	0.0385577
ENSG00000022355	1963.73	1.42178	0.457611	3.10697	0.00189015	0.00806656		ENSG00000022355	1963.73	-3.25124	0.0925587	-35.1262	2.68026e-270	1.26913e-269		ENSG00000022355	1963.73	-3.25124	0.0925587	-35.1262	2.68026e-270	1.26913e-269		ENSG00000022355	1963.73	1.42178	0.457611	3.10697	0.00189015	0.00806656		ENSG00000022355	1963.73	1.42178	0.457611	3.10697	0.00189015	0.00806656
ENSG00000022556	79.6447	0.395919	0.397826	0.995206	0.319636	0.48341		ENSG00000022556	79.6447	-1.2223	0.0805009	-15.1837	4.5372e-52	9.65509e-52		ENSG00000022556	79.6447	-1.2223	0.0805009	-15.1837	4.5372e-52	9.65509e-52		ENSG00000022556	79.6447	0.395919	0.397826	0.995206	0.319636	0.48341		ENSG00000022556	79.6447	0.395919	0.397826	0.995206	0.319636	0.48341
ENSG00000022567	767.538	0.0358336	0.268011	0.133702	0.893638	0.976646		ENSG00000022567	767.538	-0.953008	0.0541746	-17.5914	2.86541e-69	6.67146e-69		ENSG00000022567	767.538	-0.953008	0.0541746	-17.5914	2.86541e-69	6.67146e-69		ENSG00000022567	767.538	0.0358336	0.268011	0.133702	0.893638	0.976646		ENSG00000022567	767.538	0.0358336	0.268011	0.133702	0.893638	0.976646
ENSG00000022840	4229.01	0.318792	0.0598566	5.32593	1e-07	1.97e-06		ENSG00000022840	4229.01	-0.327485	0.0121078	-27.0475	4.08751e-161	1.37777e-160		ENSG00000022840	4229.01	-0.327485	0.0121078	-27.0475	4.08751e-161	1.37777e-160		ENSG00000022840	4229.01	0.318792	0.0598566	5.32593	1.00437e-07	1.97339e-06		ENSG00000022840	4229.01	0.318792	0.0598566	5.32593	1.00437e-07	1.97339e-06
ENSG00000022976	544.196	-0.422385	0.0947148	-4.45955	8.21e-06	8.3e-05		ENSG00000022976	544.196	-1.33669	0.0189109	-70.6835	0	0		ENSG00000022976	544.196	-1.33669	0.0189109	-70.6835	0	0		ENSG00000022976	544.196	-0.422385	0.0947148	-4.45955	8.21336e-06	8.30213e-05		ENSG00000022976	544.196	-0.422385	0.0947148	-4.45955	8.21336e-06	8.30213e-05
ENSG00000023041	690.041	0.229714	0.068604	3.34841	0.00081277	0.00399861		ENSG00000023041	690.041	0.127309	0.013896	9.16155	5.1158e-20	8.76233e-20		ENSG00000023041	690.041	0.127309	0.013896	9.16155	5.1158e-20	8.76233e-20		ENSG00000023041	690.041	0.229714	0.068604	3.34841	0.000812774	0.00399861		ENSG00000023041	690.041	0.229714	0.068604	3.34841	0.000812774	0.00399861
ENSG00000023171	4224.63	-0.304397	0.321372	-0.947178	0.343548	0.509773		ENSG00000023171	4224.63	-2.21994	0.0649582	-34.175	5.69117e-256	2.59282e-255		ENSG00000023171	4224.63	-2.21994	0.0649582	-34.175	5.69117e-256	2.59282e-255		ENSG00000023171	4224.63	-0.304397	0.321372	-0.947178	0.343548	0.509773		ENSG00000023171	4224.63	-0.304397	0.321372	-0.947178	0.343548	0.509773
ENSG00000023191	2975.16	0.211646	0.119281	1.77434	0.0760063	0.162439		ENSG00000023191	2975.16	0.413357	0.024119	17.1383	7.69073e-66	1.75936e-65		ENSG00000023191	2975.16	0.413357	0.024119	17.1383	7.69073e-66	1.75936e-65		ENSG00000023191	2975.16	0.211646	0.119281	1.77434	0.0760063	0.162439		ENSG00000023191	2975.16	0.211646	0.119281	1.77434	0.0760063	0.162439
ENSG00000023228	3052.31	-0.468555	0.104832	-4.46958	7.84e-06	7.97e-05		ENSG00000023228	3052.31	0.564332	0.0211861	26.6369	2.53632e-156	8.39102e-156		ENSG00000023228	3052.31	0.564332	0.0211861	26.6369	2.53632e-156	8.39102e-156		ENSG00000023228	3052.31	-0.468555	0.104832	-4.46958	7.83717e-06	7.9731e-05		ENSG00000023228	3052.31	-0.468555	0.104832	-4.46958	7.83717e-06	7.9731e-05
ENSG00000023287	2833.31	-0.242999	0.195958	-1.24005	0.214955	0.360244		ENSG00000023287	2833.31	-0.513471	0.0396097	-12.9632	1.97693e-38	3.87629e-38		ENSG00000023287	2833.31	-0.513471	0.0396097	-12.9632	1.97693e-38	3.87629e-38		ENSG00000023287	2833.31	-0.242999	0.195958	-1.24005	0.214956	0.360244		ENSG00000023287	2833.31	-0.242999	0.195958	-1.24005	0.214956	0.360244
ENSG00000023318	820.796	0.488013	0.0981941	4.96989	6.7e-07	9.9e-06		ENSG00000023318	820.796	0.867472	0.0198842	43.6262	0	0		ENSG00000023318	820.796	0.867472	0.0198842	43.6262	0	0		ENSG00000023318	820.796	0.488013	0.0981941	4.96989	6.69925e-07	9.89965e-06		ENSG00000023318	820.796	0.488013	0.0981941	4.96989	6.69925e-07	9.89965e-06
ENSG00000023330	1139.55	0.0313679	0.174539	0.179719	0.857373	0.953019		ENSG00000023330	1139.55	0.406514	0.0352885	11.5197	1.04947e-30	1.95437e-30		ENSG00000023330	1139.55	0.406514	0.0352885	11.5197	1.04947e-30	1.95437e-30		ENSG00000023330	1139.55	0.0313679	0.174539	0.179719	0.857373	0.953019		ENSG00000023330	1139.55	0.0313679	0.174539	0.179719	0.857373	0.953019
ENSG00000023445	160.14	0.615476	0.350316	1.75691	0.0789326	0.167343		ENSG00000023445	160.14	1.72234	0.0708779	24.3	1.9585e-130	5.88955e-130		ENSG00000023445	160.14	1.72234	0.0708779	24.3	1.9585e-130	5.88955e-130		ENSG00000023445	160.14	0.615476	0.350316	1.75691	0.0789325	0.167343		ENSG00000023445	160.14	0.615476	0.350316	1.75691	0.0789325	0.167343
ENSG00000023516	3499.86	-0.322718	0.152915	-2.11044	0.0348202	0.0878255		ENSG00000023516	3499.86	-0.306689	0.0309071	-9.92293	3.30911e-23	5.82118e-23		ENSG00000023516	3499.86	-0.306689	0.0309071	-9.92293	3.30911e-23	5.82118e-23		ENSG00000023516	3499.86	-0.322718	0.152915	-2.11044	0.0348202	0.0878255		ENSG00000023516	3499.86	-0.322718	0.152915	-2.11044	0.0348202	0.0878255
ENSG00000023572	226.711	0.0311567	0.179896	0.173193	0.8625	0.956419		ENSG00000023572	226.711	1.753	0.0364117	48.1439	0	0		ENSG00000023572	226.711	1.753	0.0364117	48.1439	0	0		ENSG00000023572	226.711	0.0311567	0.179896	0.173193	0.8625	0.956419		ENSG00000023572	226.711	0.0311567	0.179896	0.173193	0.8625	0.956419
ENSG00000023608	184.942	0.154783	0.139933	1.10612	0.268673	0.42547		ENSG00000023608	184.942	0.429795	0.0283313	15.1703	5.56068e-52	1.18269e-51		ENSG00000023608	184.942	0.429795	0.0283313	15.1703	5.56068e-52	1.18269e-51		ENSG00000023608	184.942	0.154783	0.139933	1.10612	0.268673	0.42547		ENSG00000023608	184.942	0.154783	0.139933	1.10612	0.268673	0.42547
ENSG00000023697	449.223	0.0445832	0.159972	0.278693	0.78048	0.898925		ENSG00000023697	449.223	1.55896	0.0323637	48.17	0	0		ENSG00000023697	449.223	1.55896	0.0323637	48.17	0	0		ENSG00000023697	449.223	0.0445832	0.159972	0.278693	0.78048	0.898925		ENSG00000023697	449.223	0.0445832	0.159972	0.278693	0.78048	0.898925
ENSG00000023734	2861.37	0.23869	0.100286	2.38009	0.0173084	0.0501923		ENSG00000023734	2861.37	0.221758	0.0202797	10.935	7.84202e-28	1.42962e-27		ENSG00000023734	2861.37	0.221758	0.0202797	10.935	7.84202e-28	1.42962e-27		ENSG00000023734	2861.37	0.23869	0.100286	2.38009	0.0173084	0.0501923		ENSG00000023734	2861.37	0.23869	0.100286	2.38009	0.0173084	0.0501923
ENSG00000023839	26.0906	-0.724648	0.286916	-2.52565	0.0115486	0.0362598		ENSG00000023839	26.0906	0.419009	0.0573149	7.31064	2.65867e-13	4.24867e-13		ENSG00000023839	26.0906	0.419009	0.0573149	7.31064	2.65867e-13	4.24867e-13		ENSG00000023839	26.0906	-0.724648	0.286916	-2.52565	0.0115486	0.0362598		ENSG00000023839	26.0906	-0.724648	0.286916	-2.52565	0.0115486	0.0362598
ENSG00000023892	205.137	0.257131	0.259994	0.988991	0.322667	0.486608		ENSG00000023892	205.137	0.942827	0.0525976	17.9253	7.48703e-72	1.76357e-71		ENSG00000023892	205.137	0.942827	0.0525976	17.9253	7.48703e-72	1.76357e-71		ENSG00000023892	205.137	0.257131	0.259994	0.988991	0.322667	0.486608		ENSG00000023892	205.137	0.257131	0.259994	0.988991	0.322667	0.486608
ENSG00000023902	1830.26	0.237611	0.149942	1.58469	0.113037	0.220533		ENSG00000023902	1830.26	0.208794	0.0303188	6.88661	5.71367e-12	8.99772e-12		ENSG00000023902	1830.26	0.208794	0.0303188	6.88661	5.71367e-12	8.99772e-12		ENSG00000023902	1830.26	0.237611	0.149942	1.58469	0.113037	0.220533		ENSG00000023902	1830.26	0.237611	0.149942	1.58469	0.113037	0.220533
ENSG00000023909	504.635	0.785104	0.154348	5.08657	3.65e-07	5.89e-06		ENSG00000023909	504.635	0.430295	0.0312524	13.7684	3.94945e-43	7.97797e-43		ENSG00000023909	504.635	0.430295	0.0312524	13.7684	3.94945e-43	7.97797e-43		ENSG00000023909	504.635	0.785104	0.154348	5.08657	3.64591e-07	5.8938e-06		ENSG00000023909	504.635	0.785104	0.154348	5.08657	3.64591e-07	5.8938e-06
ENSG00000024048	1382.25	-0.455562	0.140034	-3.25322	0.00114105	0.00530437		ENSG00000024048	1382.25	0.401391	0.0282958	14.1855	1.12624e-45	2.30972e-45		ENSG00000024048	1382.25	0.401391	0.0282958	14.1855	1.12624e-45	2.30972e-45		ENSG00000024048	1382.25	-0.455562	0.140034	-3.25322	0.00114105	0.00530437		ENSG00000024048	1382.25	-0.455562	0.140034	-3.25322	0.00114105	0.00530437
ENSG00000024422	997.711	1.19697	0.236804	5.05469	4.31e-07	6.82e-06		ENSG00000024422	997.711	1.00238	0.0478929	20.9295	2.88363e-97	7.60837e-97		ENSG00000024422	997.711	1.00238	0.0478929	20.9295	2.88363e-97	7.60837e-97		ENSG00000024422	997.711	1.19697	0.236804	5.05469	4.31084e-07	6.82346e-06		ENSG00000024422	997.711	1.19697	0.236804	5.05469	4.31084e-07	6.82346e-06
ENSG00000024526	36.4659	-0.196163	0.372084	-0.5272	0.598054	0.755333		ENSG00000024526	36.4659	5.61615	0.0761141	73.786	0	0		ENSG00000024526	36.4659	5.61615	0.0761141	73.786	0	0		ENSG00000024526	36.4659	-0.196163	0.372084	-0.5272	0.598054	0.755333		ENSG00000024526	36.4659	-0.196163	0.372084	-0.5272	0.598054	0.755333
ENSG00000024862	779.284	0.727508	0.135588	5.36559	8.07e-08	1.64e-06		ENSG00000024862	779.284	-1.10892	0.0274652	-40.3754	0	0		ENSG00000024862	779.284	-1.10892	0.0274652	-40.3754	0	0		ENSG00000024862	779.284	0.727508	0.135588	5.36559	8.06844e-08	1.63563e-06		ENSG00000024862	779.284	0.727508	0.135588	5.36559	8.06844e-08	1.63563e-06
ENSG00000025039	1364.48	-0.239509	0.15073	-1.58899	0.112062	0.219029		ENSG00000025039	1364.48	0.492432	0.0304677	16.1624	9.28772e-59	2.04925e-58		ENSG00000025039	1364.48	0.492432	0.0304677	16.1624	9.28772e-59	2.04925e-58		ENSG00000025039	1364.48	-0.239509	0.15073	-1.58899	0.112062	0.219029		ENSG00000025039	1364.48	-0.239509	0.15073	-1.58899	0.112062	0.219029
ENSG00000025156	525.118	-0.0431556	0.116187	-0.371431	0.710316	0.847834		ENSG00000025156	525.118	0.209727	0.0234841	8.93059	4.23752e-19	7.1996e-19		ENSG00000025156	525.118	0.209727	0.0234841	8.93059	4.23752e-19	7.1996e-19		ENSG00000025156	525.118	-0.0431556	0.116187	-0.371431	0.710316	0.847834		ENSG00000025156	525.118	-0.0431556	0.116187	-0.371431	0.710316	0.847834
ENSG00000025293	1187.36	-0.0105155	0.0879083	-0.119619	0.904785	0.983824		ENSG00000025293	1187.36	0.55682	0.0177758	31.3246	2.15907e-215	8.70803e-215		ENSG00000025293	1187.36	0.55682	0.0177758	31.3246	2.15907e-215	8.70803e-215		ENSG00000025293	1187.36	-0.0105155	0.0879083	-0.119619	0.904785	0.983825		ENSG00000025293	1187.36	-0.0105155	0.0879083	-0.119619	0.904785	0.983825
ENSG00000025423	437.383	-0.373252	0.279607	-1.33492	0.181903	0.317184		ENSG00000025423	437.383	-1.33129	0.0564385	-23.5884	5.06812e-123	1.48291e-122		ENSG00000025423	437.383	-1.33129	0.0564385	-23.5884	5.06812e-123	1.48291e-122		ENSG00000025423	437.383	-0.373252	0.279607	-1.33492	0.181903	0.317184		ENSG00000025423	437.383	-0.373252	0.279607	-1.33492	0.181903	0.317184
ENSG00000025434	400.407	0.123845	0.152731	0.810869	0.417441	0.586262		ENSG00000025434	400.407	0.605554	0.0308954	19.6002	1.54157e-85	3.86844e-85		ENSG00000025434	400.407	0.605554	0.0308954	19.6002	1.54157e-85	3.86844e-85		ENSG00000025434	400.407	0.123845	0.152731	0.810869	0.417441	0.586262		ENSG00000025434	400.407	0.123845	0.152731	0.810869	0.417441	0.586262
ENSG00000025708	559.577	0.367291	0.387343	0.948232	0.343012	0.5092		ENSG00000025708	559.577	1.03915	0.0783195	13.268	3.54792e-40	7.03543e-40		ENSG00000025708	559.577	1.03915	0.0783195	13.268	3.54792e-40	7.03543e-40		ENSG00000025708	559.577	0.367291	0.387343	0.948232	0.343012	0.5092		ENSG00000025708	559.577	0.367291	0.387343	0.948232	0.343012	0.5092
ENSG00000025770	1300.19	-0.350435	0.122585	-2.85871	0.00425362	0.0158257		ENSG00000025770	1300.19	0.38859	0.0247697	15.6881	1.82429e-55	3.95612e-55		ENSG00000025770	1300.19	0.38859	0.0247697	15.6881	1.82429e-55	3.95612e-55		ENSG00000025770	1300.19	-0.350435	0.122585	-2.85871	0.00425362	0.0158257		ENSG00000025770	1300.19	-0.350435	0.122585	-2.85871	0.00425362	0.0158257
ENSG00000025772	1440.31	0.0989634	0.295118	0.335335	0.737372	0.867412		ENSG00000025772	1440.31	-0.513799	0.0596632	-8.61165	7.20191e-18	1.20986e-17		ENSG00000025772	1440.31	-0.513799	0.0596632	-8.61165	7.20191e-18	1.20986e-17		ENSG00000025772	1440.31	0.0989634	0.295118	0.335335	0.737372	0.867412		ENSG00000025772	1440.31	0.0989634	0.295118	0.335335	0.737372	0.867412
ENSG00000025796	1863.75	0.479293	0.101952	4.70114	2.59e-06	3.14e-05		ENSG00000025796	1863.75	-0.0138609	0.0206258	-0.672019	0.501572	0.59082		ENSG00000025796	1863.75	-0.0138609	0.0206258	-0.672019	0.501572	0.59082		ENSG00000025796	1863.75	0.479293	0.101952	4.70114	2.58708e-06	3.14425e-05		ENSG00000025796	1863.75	0.479293	0.101952	4.70114	2.58708e-06	3.14425e-05
ENSG00000025800	2049.57	-0.186783	0.0946234	-1.97396	0.048386	0.114244		ENSG00000025800	2049.57	0.385605	0.019125	20.1623	2.09904e-90	5.3764e-90		ENSG00000025800	2049.57	0.385605	0.019125	20.1623	2.09904e-90	5.3764e-90		ENSG00000025800	2049.57	-0.186783	0.0946234	-1.97396	0.048386	0.114244		ENSG00000025800	2049.57	-0.186783	0.0946234	-1.97396	0.048386	0.114244
ENSG00000026025	13298.3	0.808138	0.348294	2.32027	0.020326	0.0570056		ENSG00000026025	13298.3	1.51099	0.0704154	21.4582	3.82453e-102	1.02895e-101		ENSG00000026025	13298.3	1.51099	0.0704154	21.4582	3.82453e-102	1.02895e-101		ENSG00000026025	13298.3	0.808138	0.348294	2.32027	0.020326	0.0570056		ENSG00000026025	13298.3	0.808138	0.348294	2.32027	0.020326	0.0570056
ENSG00000026036	2053.49	-0.94301	0.254396	-3.70685	0.00020985	0.00128427		ENSG00000026036	2053.49	-4.5659	0.0509444	-89.6253	0	0		ENSG00000026036	2053.49	-4.5659	0.0509444	-89.6253	0	0		ENSG00000026036	2053.49	-0.94301	0.254396	-3.70685	0.000209852	0.00128427		ENSG00000026036	2053.49	-0.94301	0.254396	-3.70685	0.000209852	0.00128427
ENSG00000026103	262.537	0.959884	0.318967	3.00935	0.00261809	0.0105545		ENSG00000026103	262.537	1.12139	0.0645306	17.3776	1.21863e-67	2.81448e-67		ENSG00000026103	262.537	1.12139	0.0645306	17.3776	1.21863e-67	2.81448e-67		ENSG00000026103	262.537	0.959884	0.318967	3.00935	0.00261809	0.0105545		ENSG00000026103	262.537	0.959884	0.318967	3.00935	0.00261809	0.0105545
ENSG00000026297	1343.74	0.124445	0.271852	0.457767	0.64712	0.797736		ENSG00000026297	1343.74	-0.101459	0.0549614	-1.846	0.0648928	0.0829942		ENSG00000026297	1343.74	-0.101459	0.0549614	-1.846	0.0648928	0.0829942		ENSG00000026297	1343.74	0.124445	0.271852	0.457767	0.64712	0.797736		ENSG00000026297	1343.74	0.124445	0.271852	0.457767	0.64712	0.797736
ENSG00000026508	2736.77	0.717259	0.45664	1.57073	0.116245	0.225423		ENSG00000026508	2736.77	3.64624	0.092323	39.4944	0	0		ENSG00000026508	2736.77	3.64624	0.092323	39.4944	0	0		ENSG00000026508	2736.77	0.717259	0.45664	1.57073	0.116245	0.225423		ENSG00000026508	2736.77	0.717259	0.45664	1.57073	0.116245	0.225423
ENSG00000026559	230.411	0.452522	0.395958	1.14285	0.253099	0.406567		ENSG00000026559	230.411	-1.07344	0.0800828	-13.4041	5.72127e-41	1.14026e-40		ENSG00000026559	230.411	-1.07344	0.0800828	-13.4041	5.72127e-41	1.14026e-40		ENSG00000026559	230.411	0.452522	0.395958	1.14285	0.253099	0.406567		ENSG00000026559	230.411	0.452522	0.395958	1.14285	0.253099	0.406567
ENSG00000026652	2167	-0.399196	0.244296	-1.63407	0.102244	0.204206		ENSG00000026652	2167	-0.605693	0.049377	-12.2667	1.36736e-34	2.61532e-34		ENSG00000026652	2167	-0.605693	0.049377	-12.2667	1.36736e-34	2.61532e-34		ENSG00000026652	2167	-0.399196	0.244296	-1.63407	0.102244	0.204206		ENSG00000026652	2167	-0.399196	0.244296	-1.63407	0.102244	0.204206
ENSG00000026751	13.3229	1.46135	0.438898	3.32958	0.00086977	0.00423173		ENSG00000026751	13.3229	2.00226	0.0894569	22.3824	5.84049e-111	1.62943e-110		ENSG00000026751	13.3229	2.00226	0.0894569	22.3824	5.84049e-111	1.62943e-110		ENSG00000026751	13.3229	1.46135	0.438898	3.32958	0.000869766	0.00423173		ENSG00000026751	13.3229	1.46135	0.438898	3.32958	0.000869766	0.00423173
ENSG00000026950	694.489	-0.060684	0.195755	-0.31	0.756561	0.880747		ENSG00000026950	694.489	1.14874	0.0395818	29.0219	3.48546e-185	1.27443e-184		ENSG00000026950	694.489	1.14874	0.0395818	29.0219	3.48546e-185	1.27443e-184		ENSG00000026950	694.489	-0.060684	0.195755	-0.31	0.756561	0.880747		ENSG00000026950	694.489	-0.060684	0.195755	-0.31	0.756561	0.880747
ENSG00000027001	226.522	-0.087854	0.146492	-0.599719	0.548694	0.711797		ENSG00000027001	226.522	1.26079	0.0296413	42.535	0	0		ENSG00000027001	226.522	1.26079	0.0296413	42.535	0	0		ENSG00000027001	226.522	-0.087854	0.146492	-0.599719	0.548694	0.711797		ENSG00000027001	226.522	-0.087854	0.146492	-0.599719	0.548694	0.711797
ENSG00000027075	504.648	-0.255615	0.301592	-0.847551	0.396688	0.565719		ENSG00000027075	504.648	-0.519183	0.0609456	-8.51878	1.61237e-17	2.69902e-17		ENSG00000027075	504.648	-0.519183	0.0609456	-8.51878	1.61237e-17	2.69902e-17		ENSG00000027075	504.648	-0.255615	0.301592	-0.847551	0.396688	0.565719		ENSG00000027075	504.648	-0.255615	0.301592	-0.847551	0.396688	0.565719
ENSG00000027644	42.4549	0.924497	0.532931	1.73474	0.082787	0.17366		ENSG00000027644	42.4549	0.554854	0.107921	5.14128	2.72873e-07	4.02736e-07		ENSG00000027644	42.4549	0.554854	0.107921	5.14128	2.72873e-07	4.02736e-07		ENSG00000027644	42.4549	0.924497	0.532931	1.73474	0.082787	0.17366		ENSG00000027644	42.4549	0.924497	0.532931	1.73474	0.082787	0.17366
ENSG00000027697	1787.95	0.0684634	0.221823	0.30864	0.757596	0.881597		ENSG00000027697	1787.95	1.05253	0.0448491	23.4683	8.59848e-122	2.50464e-121		ENSG00000027697	1787.95	1.05253	0.0448491	23.4683	8.59848e-122	2.50464e-121		ENSG00000027697	1787.95	0.0684634	0.221823	0.30864	0.757596	0.881597		ENSG00000027697	1787.95	0.0684634	0.221823	0.30864	0.757596	0.881597
ENSG00000027847	597.42	0.0654203	0.0962797	0.679483	0.496832	0.663915		ENSG00000027847	597.42	0.802346	0.0194819	41.1843	0	0		ENSG00000027847	597.42	0.802346	0.0194819	41.1843	0	0		ENSG00000027847	597.42	0.0654203	0.0962797	0.679483	0.496832	0.663915		ENSG00000027847	597.42	0.0654203	0.0962797	0.679483	0.496832	0.663915
ENSG00000027869	22.7022	0.986179	0.352794	2.79534	0.0051845	0.018674		ENSG00000027869	22.7022	0.967982	0.0718078	13.4802	2.04587e-41	4.08825e-41		ENSG00000027869	22.7022	0.967982	0.0718078	13.4802	2.04587e-41	4.08825e-41		ENSG00000027869	22.7022	0.986179	0.352794	2.79534	0.0051845	0.018674		ENSG00000027869	22.7022	0.986179	0.352794	2.79534	0.0051845	0.018674
ENSG00000028116	493.302	-0.0155528	0.240104	-0.0647754	0.948353	1		ENSG00000028116	493.302	-1.63597	0.0484981	-33.7327	1.91547e-249	8.55089e-249		ENSG00000028116	493.302	-1.63597	0.0484981	-33.7327	1.91547e-249	8.55089e-249		ENSG00000028116	493.302	-0.0155528	0.240104	-0.0647754	0.948353	1		ENSG00000028116	493.302	-0.0155528	0.240104	-0.0647754	0.948353	1
ENSG00000028137	783.701	0.523483	0.333966	1.56747	0.117004	0.226505		ENSG00000028137	783.701	1.31405	0.0675284	19.4592	2.43646e-84	6.08247e-84		ENSG00000028137	783.701	1.31405	0.0675284	19.4592	2.43646e-84	6.08247e-84		ENSG00000028137	783.701	0.523483	0.333966	1.56747	0.117004	0.226505		ENSG00000028137	783.701	0.523483	0.333966	1.56747	0.117004	0.226505
ENSG00000028203	1244.52	-0.16006	0.0768337	-2.08319	0.0372335	0.0927175		ENSG00000028203	1244.52	0.471116	0.0155268	30.3422	3.18869e-202	1.23264e-201		ENSG00000028203	1244.52	0.471116	0.0155268	30.3422	3.18869e-202	1.23264e-201		ENSG00000028203	1244.52	-0.16006	0.0768337	-2.08319	0.0372335	0.0927175		ENSG00000028203	1244.52	-0.16006	0.0768337	-2.08319	0.0372335	0.0927175
ENSG00000028277	480.716	1.11663	0.275394	4.05464	5.02e-05	0.00038281		ENSG00000028277	480.716	-0.840521	0.0557345	-15.0808	2.16682e-51	4.59326e-51		ENSG00000028277	480.716	-0.840521	0.0557345	-15.0808	2.16682e-51	4.59326e-51		ENSG00000028277	480.716	1.11663	0.275394	4.05464	5.02113e-05	0.000382807		ENSG00000028277	480.716	1.11663	0.275394	4.05464	5.02113e-05	0.000382807
ENSG00000028310	1221.77	-0.0114929	0.104571	-0.109906	0.912484	0.988001		ENSG00000028310	1221.77	-0.222579	0.0211346	-10.5315	6.18468e-26	1.11241e-25		ENSG00000028310	1221.77	-0.222579	0.0211346	-10.5315	6.18468e-26	1.11241e-25		ENSG00000028310	1221.77	-0.0114929	0.104571	-0.109906	0.912484	0.988001		ENSG00000028310	1221.77	-0.0114929	0.104571	-0.109906	0.912484	0.988001
ENSG00000028528	2954.38	0.130806	0.126336	1.03538	0.300491	0.461716		ENSG00000028528	2954.38	0.0535992	0.0255431	2.09838	0.0358712	0.0464913		ENSG00000028528	2954.38	0.0535992	0.0255431	2.09838	0.0358712	0.0464913		ENSG00000028528	2954.38	0.130806	0.126336	1.03538	0.300491	0.461716		ENSG00000028528	2954.38	0.130806	0.126336	1.03538	0.300491	0.461716
ENSG00000028839	807.116	0.322929	0.125999	2.56295	0.0103786	0.0331571		ENSG00000028839	807.116	-1.3723	0.0254861	-53.8452	0	0		ENSG00000028839	807.116	-1.3723	0.0254861	-53.8452	0	0		ENSG00000028839	807.116	0.322929	0.125999	2.56295	0.0103786	0.0331571		ENSG00000028839	807.116	0.322929	0.125999	2.56295	0.0103786	0.0331571
ENSG00000029153	266.773	-0.186284	0.227567	-0.818592	0.413019	0.582261		ENSG00000029153	266.773	1.29302	0.0460154	28.0997	9.88707e-174	3.47887e-173		ENSG00000029153	266.773	1.29302	0.0460154	28.0997	9.88707e-174	3.47887e-173		ENSG00000029153	266.773	-0.186284	0.227567	-0.818592	0.413019	0.582261		ENSG00000029153	266.773	-0.186284	0.227567	-0.818592	0.413019	0.582261
ENSG00000029363	2904.87	-0.0497127	0.110779	-0.448756	0.653608	0.803238		ENSG00000029363	2904.87	0.0605469	0.0223943	2.70368	0.00685767	0.0091418		ENSG00000029363	2904.87	0.0605469	0.0223943	2.70368	0.00685767	0.0091418		ENSG00000029363	2904.87	-0.0497127	0.110779	-0.448756	0.653608	0.803238		ENSG00000029363	2904.87	-0.0497127	0.110779	-0.448756	0.653608	0.803238
ENSG00000029364	1477.55	-0.0703634	0.0702705	-1.00132	0.316671	0.48003		ENSG00000029364	1477.55	1.16101	0.0142142	81.6794	0	0		ENSG00000029364	1477.55	1.16101	0.0142142	81.6794	0	0		ENSG00000029364	1477.55	-0.0703634	0.0702705	-1.00132	0.316671	0.48003		ENSG00000029364	1477.55	-0.0703634	0.0702705	-1.00132	0.316671	0.48003
ENSG00000029534	1712.2	0.624895	0.494532	1.26361	0.20637	0.34939		ENSG00000029534	1712.2	-3.19137	0.0999954	-31.9152	1.64298e-223	6.78718e-223		ENSG00000029534	1712.2	-3.19137	0.0999954	-31.9152	1.64298e-223	6.78718e-223		ENSG00000029534	1712.2	0.624895	0.494532	1.26361	0.20637	0.34939		ENSG00000029534	1712.2	0.624895	0.494532	1.26361	0.20637	0.34939
ENSG00000029559	56.4646	1.20889	0.669087	1.80678	0.0707964	0.153997		ENSG00000029559	56.4646	6.29558	0.135823	46.3514	0	0		ENSG00000029559	56.4646	6.29558	0.135823	46.3514	0	0		ENSG00000029559	56.4646	1.20889	0.669087	1.80678	0.0707964	0.153997		ENSG00000029559	56.4646	1.20889	0.669087	1.80678	0.0707964	0.153997
ENSG00000029639	194.419	-0.251888	0.0841589	-2.993	0.00276246	0.0110416		ENSG00000029639	194.419	0.444535	0.0169323	26.2537	6.49302e-152	2.11665e-151		ENSG00000029639	194.419	0.444535	0.0169323	26.2537	6.49302e-152	2.11665e-151		ENSG00000029639	194.419	-0.251888	0.0841589	-2.993	0.00276246	0.0110416		ENSG00000029639	194.419	-0.251888	0.0841589	-2.993	0.00276246	0.0110416
ENSG00000029725	3451.36	-0.126633	0.113846	-1.11232	0.266	0.422285		ENSG00000029725	3451.36	-1.00804	0.0230051	-43.8182	0	0		ENSG00000029725	3451.36	-1.00804	0.0230051	-43.8182	0	0		ENSG00000029725	3451.36	-0.126633	0.113846	-1.11232	0.266	0.422285		ENSG00000029725	3451.36	-0.126633	0.113846	-1.11232	0.266	0.422285
ENSG00000029993	563.655	0.0394579	0.226915	0.173888	0.861953	0.956064		ENSG00000029993	563.655	1.22014	0.0458854	26.591	8.61899e-156	2.84605e-155		ENSG00000029993	563.655	1.22014	0.0458854	26.591	8.61899e-156	2.84605e-155		ENSG00000029993	563.655	0.0394579	0.226915	0.173888	0.861953	0.956064		ENSG00000029993	563.655	0.0394579	0.226915	0.173888	0.861953	0.956064
ENSG00000030066	802.396	-0.158891	0.159357	-0.997077	0.318727	0.482416		ENSG00000030066	802.396	1.77028	0.0322264	54.9327	0	0		ENSG00000030066	802.396	1.77028	0.0322264	54.9327	0	0		ENSG00000030066	802.396	-0.158891	0.159357	-0.997077	0.318727	0.482416		ENSG00000030066	802.396	-0.158891	0.159357	-0.997077	0.318727	0.482416
ENSG00000030110	291.925	0.277728	0.102963	2.69737	0.00698898	0.0239272		ENSG00000030110	291.925	0.785089	0.0208765	37.6063	0	0		ENSG00000030110	291.925	0.785089	0.0208765	37.6063	0	0		ENSG00000030110	291.925	0.277728	0.102963	2.69737	0.00698898	0.0239272		ENSG00000030110	291.925	0.277728	0.102963	2.69737	0.00698898	0.0239272
ENSG00000030304	12.6149	-1.69413	0.548914	-3.08632	0.00202647	0.0085465		ENSG00000030304	12.6149	1.68994	0.109862	15.3824	2.14959e-53	4.60879e-53		ENSG00000030304	12.6149	1.68994	0.109862	15.3824	2.14959e-53	4.60879e-53		ENSG00000030304	12.6149	-1.69413	0.548914	-3.08632	0.00202647	0.0085465		ENSG00000030304	12.6149	-1.69413	0.548914	-3.08632	0.00202647	0.0085465
ENSG00000030419	243.513	-0.903629	0.194023	-4.65733	3.2e-06	3.75e-05		ENSG00000030419	243.513	1.15687	0.0391476	29.5515	6.28069e-192	2.3519e-191		ENSG00000030419	243.513	1.15687	0.0391476	29.5515	6.28069e-192	2.3519e-191		ENSG00000030419	243.513	-0.903629	0.194023	-4.65733	3.20331e-06	3.7529e-05		ENSG00000030419	243.513	-0.903629	0.194023	-4.65733	3.20331e-06	3.7529e-05
ENSG00000030582	1959.99	0.456046	0.158971	2.86873	0.00412122	0.0154103		ENSG00000030582	1959.99	2.46585	0.0321495	76.6994	0	0		ENSG00000030582	1959.99	2.46585	0.0321495	76.6994	0	0		ENSG00000030582	1959.99	0.456046	0.158971	2.86873	0.00412122	0.0154102		ENSG00000030582	1959.99	0.456046	0.158971	2.86873	0.00412122	0.0154102
ENSG00000031003	1307.19	-0.118675	0.138556	-0.856514	0.391714	0.560768		ENSG00000031003	1307.19	-0.247166	0.0280018	-8.8268	1.07717e-18	1.82285e-18		ENSG00000031003	1307.19	-0.247166	0.0280018	-8.8268	1.07717e-18	1.82285e-18		ENSG00000031003	1307.19	-0.118675	0.138556	-0.856514	0.391714	0.560768		ENSG00000031003	1307.19	-0.118675	0.138556	-0.856514	0.391714	0.560768
ENSG00000031081	1029.71	-0.712468	0.186756	-3.81497	0.0001362	0.00089082		ENSG00000031081	1029.71	1.85164	0.0377527	49.0466	0	0		ENSG00000031081	1029.71	1.85164	0.0377527	49.0466	0	0		ENSG00000031081	1029.71	-0.712468	0.186756	-3.81497	0.000136198	0.00089082		ENSG00000031081	1029.71	-0.712468	0.186756	-3.81497	0.000136198	0.00089082
ENSG00000031691	165.216	0.514941	0.192814	2.67066	0.00757013	0.0255612		ENSG00000031691	165.216	1.04404	0.0390657	26.7252	2.39836e-157	7.96304e-157		ENSG00000031691	165.216	1.04404	0.0390657	26.7252	2.39836e-157	7.96304e-157		ENSG00000031691	165.216	0.514941	0.192814	2.67066	0.00757013	0.0255612		ENSG00000031691	165.216	0.514941	0.192814	2.67066	0.00757013	0.0255612
ENSG00000031698	3761.15	0.0882242	0.117687	0.749653	0.453464	0.622229		ENSG00000031698	3761.15	0.503428	0.0237946	21.1573	2.36533e-99	6.29289e-99		ENSG00000031698	3761.15	0.503428	0.0237946	21.1573	2.36533e-99	6.29289e-99		ENSG00000031698	3761.15	0.0882242	0.117687	0.749653	0.453464	0.622229		ENSG00000031698	3761.15	0.0882242	0.117687	0.749653	0.453464	0.622229
ENSG00000031823	1810.33	0.143139	0.0653603	2.18999	0.0285246	0.0749815		ENSG00000031823	1810.33	0.0322798	0.0132196	2.44182	0.0146133	0.0192597		ENSG00000031823	1810.33	0.0322798	0.0132196	2.44182	0.0146133	0.0192597		ENSG00000031823	1810.33	0.143139	0.0653603	2.18999	0.0285247	0.0749815		ENSG00000031823	1810.33	0.143139	0.0653603	2.18999	0.0285247	0.0749815
ENSG00000032219	814.797	-0.0398938	0.117006	-0.340956	0.733137	0.864529		ENSG00000032219	814.797	-0.215259	0.0236439	-9.10423	8.68812e-20	1.48544e-19		ENSG00000032219	814.797	-0.215259	0.0236439	-9.10423	8.68812e-20	1.48544e-19		ENSG00000032219	814.797	-0.0398938	0.117006	-0.340956	0.733137	0.864529		ENSG00000032219	814.797	-0.0398938	0.117006	-0.340956	0.733137	0.864529
ENSG00000032389	884.498	-0.139023	0.11544	-1.20429	0.228479	0.376956		ENSG00000032389	884.498	0.239961	0.0233294	10.2858	8.16578e-25	1.4561e-24		ENSG00000032389	884.498	0.239961	0.0233294	10.2858	8.16578e-25	1.4561e-24		ENSG00000032389	884.498	-0.139023	0.11544	-1.20429	0.228479	0.376956		ENSG00000032389	884.498	-0.139023	0.11544	-1.20429	0.228479	0.376956
ENSG00000032444	2541.75	0.219878	0.105756	2.07911	0.0376074	0.0934267		ENSG00000032444	2541.75	-0.10954	0.0213847	-5.12237	3.01726e-07	4.44943e-07		ENSG00000032444	2541.75	-0.10954	0.0213847	-5.12237	3.01726e-07	4.44943e-07		ENSG00000032444	2541.75	0.219878	0.105756	2.07911	0.0376074	0.0934267		ENSG00000032444	2541.75	0.219878	0.105756	2.07911	0.0376074	0.0934267
ENSG00000032742	467.448	-0.274401	0.144451	-1.89961	0.0574848	0.130812		ENSG00000032742	467.448	0.21159	0.0291741	7.25266	4.08653e-13	6.51777e-13		ENSG00000032742	467.448	0.21159	0.0291741	7.25266	4.08653e-13	6.51777e-13		ENSG00000032742	467.448	-0.274401	0.144451	-1.89961	0.0574848	0.130812		ENSG00000032742	467.448	-0.274401	0.144451	-1.89961	0.0574848	0.130812
ENSG00000033011	479.408	-0.0858247	0.0804893	-1.06629	0.286294	0.445401		ENSG00000033011	479.408	0.221705	0.0162562	13.6381	2.37624e-42	4.77334e-42		ENSG00000033011	479.408	0.221705	0.0162562	13.6381	2.37624e-42	4.77334e-42		ENSG00000033011	479.408	-0.0858247	0.0804893	-1.06629	0.286294	0.445401		ENSG00000033011	479.408	-0.0858247	0.0804893	-1.06629	0.286294	0.445401
ENSG00000033030	606.127	-0.0872282	0.169179	-0.515597	0.606136	0.762222		ENSG00000033030	606.127	0.100808	0.0341949	2.94805	0.0031978	0.00430915		ENSG00000033030	606.127	0.100808	0.0341949	2.94805	0.0031978	0.00430915		ENSG00000033030	606.127	-0.0872282	0.169179	-0.515597	0.606136	0.762222		ENSG00000033030	606.127	-0.0872282	0.169179	-0.515597	0.606136	0.762222
ENSG00000033050	1269.63	-0.0802033	0.0866096	-0.926033	0.354429	0.521649		ENSG00000033050	1269.63	-0.857226	0.0174808	-49.0382	0	0		ENSG00000033050	1269.63	-0.857226	0.0174808	-49.0382	0	0		ENSG00000033050	1269.63	-0.0802033	0.0866096	-0.926033	0.354429	0.521649		ENSG00000033050	1269.63	-0.0802033	0.0866096	-0.926033	0.354429	0.521649
ENSG00000033100	819.097	-0.167257	0.142118	-1.17688	0.239242	0.390081		ENSG00000033100	819.097	1.97942	0.0287442	68.8631	0	0		ENSG00000033100	819.097	1.97942	0.0287442	68.8631	0	0		ENSG00000033100	819.097	-0.167257	0.142118	-1.17688	0.239242	0.390081		ENSG00000033100	819.097	-0.167257	0.142118	-1.17688	0.239242	0.390081
ENSG00000033122	966.503	-0.524533	0.381879	-1.37356	0.169579	0.300475		ENSG00000033122	966.503	-1.9278	0.0771433	-24.9899	7.86817e-138	2.43536e-137		ENSG00000033122	966.503	-1.9278	0.0771433	-24.9899	7.86817e-138	2.43536e-137		ENSG00000033122	966.503	-0.524533	0.381879	-1.37356	0.169579	0.300475		ENSG00000033122	966.503	-0.524533	0.381879	-1.37356	0.169579	0.300475
ENSG00000033170	1250.3	0.0693942	0.170438	0.407152	0.683896	0.827783		ENSG00000033170	1250.3	0.259899	0.0344596	7.54213	4.62359e-14	7.45887e-14		ENSG00000033170	1250.3	0.259899	0.0344596	7.54213	4.62359e-14	7.45887e-14		ENSG00000033170	1250.3	0.0693942	0.170438	0.407152	0.683896	0.827783		ENSG00000033170	1250.3	0.0693942	0.170438	0.407152	0.683896	0.827783
ENSG00000033178	1119.1	-0.325935	0.118057	-2.76084	0.00576536	0.020397		ENSG00000033178	1119.1	0.741888	0.0238591	31.0945	2.85603e-212	1.14092e-211		ENSG00000033178	1119.1	0.741888	0.0238591	31.0945	2.85603e-212	1.14092e-211		ENSG00000033178	1119.1	-0.325935	0.118057	-2.76084	0.00576536	0.0203971		ENSG00000033178	1119.1	-0.325935	0.118057	-2.76084	0.00576536	0.0203971
ENSG00000033327	3343.12	-0.2642	0.303078	-0.871725	0.383358	0.551837		ENSG00000033327	3343.12	-0.261988	0.06127	-4.27597	1.90308e-05	2.70993e-05		ENSG00000033327	3343.12	-0.261988	0.06127	-4.27597	1.90308e-05	2.70993e-05		ENSG00000033327	3343.12	-0.2642	0.303078	-0.871725	0.383358	0.551837		ENSG00000033327	3343.12	-0.2642	0.303078	-0.871725	0.383358	0.551837
ENSG00000033627	7220	0.350345	0.126349	2.77283	0.00555706	0.0197861		ENSG00000033627	7220	-1.24089	0.025546	-48.5747	0	0		ENSG00000033627	7220	-1.24089	0.025546	-48.5747	0	0		ENSG00000033627	7220	0.350345	0.126349	2.77283	0.00555706	0.0197861		ENSG00000033627	7220	0.350345	0.126349	2.77283	0.00555706	0.0197861
ENSG00000033800	1182.89	0.0730341	0.110902	0.658543	0.510189	0.676736		ENSG00000033800	1182.89	-0.396468	0.0224182	-17.6851	5.46134e-70	1.2759e-69		ENSG00000033800	1182.89	-0.396468	0.0224182	-17.6851	5.46134e-70	1.2759e-69		ENSG00000033800	1182.89	0.0730341	0.110902	0.658543	0.510189	0.676736		ENSG00000033800	1182.89	0.0730341	0.110902	0.658543	0.510189	0.676736
ENSG00000033867	484.938	-0.749178	0.182679	-4.10107	4.11e-05	0.00032281		ENSG00000033867	484.938	2.41775	0.0369352	65.4591	0	0		ENSG00000033867	484.938	2.41775	0.0369352	65.4591	0	0		ENSG00000033867	484.938	-0.749178	0.182679	-4.10107	4.11249e-05	0.00032281		ENSG00000033867	484.938	-0.749178	0.182679	-4.10107	4.11249e-05	0.00032281
ENSG00000034053	4439.6	-0.318963	0.185442	-1.72001	0.0854305	0.177917		ENSG00000034053	4439.6	-0.282683	0.0374861	-7.54102	4.66321e-14	7.52237e-14		ENSG00000034053	4439.6	-0.282683	0.0374861	-7.54102	4.66321e-14	7.52237e-14		ENSG00000034053	4439.6	-0.318963	0.185442	-1.72001	0.0854305	0.177917		ENSG00000034053	4439.6	-0.318963	0.185442	-1.72001	0.0854305	0.177917
ENSG00000034152	614.641	0.481812	0.196703	2.44944	0.0143078	0.0430544		ENSG00000034152	614.641	0.137538	0.0397893	3.45665	0.000546935	0.000753352		ENSG00000034152	614.641	0.137538	0.0397893	3.45665	0.000546935	0.000753352		ENSG00000034152	614.641	0.481811	0.196703	2.44944	0.0143078	0.0430544		ENSG00000034152	614.641	0.481811	0.196703	2.44944	0.0143078	0.0430544
ENSG00000034239	166.487	-1.72128	0.55482	-3.10241	0.00191949	0.00816801		ENSG00000034239	166.487	-1.60368	0.111374	-14.399	5.24656e-47	1.08396e-46		ENSG00000034239	166.487	-1.60368	0.111374	-14.399	5.24656e-47	1.08396e-46		ENSG00000034239	166.487	-1.72128	0.55482	-3.10241	0.00191949	0.00816801		ENSG00000034239	166.487	-1.72128	0.55482	-3.10241	0.00191949	0.00816801
ENSG00000034510	11101.9	0.202576	0.263819	0.767861	0.44257	0.611571		ENSG00000034510	11101.9	1.57924	0.053337	29.6087	1.15378e-192	4.32728e-192		ENSG00000034510	11101.9	1.57924	0.053337	29.6087	1.15378e-192	4.32728e-192		ENSG00000034510	11101.9	0.202576	0.263819	0.767861	0.44257	0.611571		ENSG00000034510	11101.9	0.202576	0.263819	0.767861	0.44257	0.611571
ENSG00000034533	331.448	-0.153724	0.0798445	-1.92529	0.0541936	0.124864		ENSG00000034533	331.448	-0.103717	0.0160717	-6.4534	1.09368e-10	1.69601e-10		ENSG00000034533	331.448	-0.103717	0.0160717	-6.4534	1.09368e-10	1.69601e-10		ENSG00000034533	331.448	-0.153724	0.0798445	-1.92529	0.0541936	0.124864		ENSG00000034533	331.448	-0.153724	0.0798445	-1.92529	0.0541936	0.124864
ENSG00000034677	1741.52	-0.109185	0.131363	-0.83117	0.405878	0.57486		ENSG00000034677	1741.52	1.38731	0.0265617	52.2296	0	0		ENSG00000034677	1741.52	1.38731	0.0265617	52.2296	0	0		ENSG00000034677	1741.52	-0.109185	0.131363	-0.83117	0.405878	0.57486		ENSG00000034677	1741.52	-0.109185	0.131363	-0.83117	0.405878	0.57486
ENSG00000034693	284.378	0.137328	0.0939693	1.46141	0.143902	0.265043		ENSG00000034693	284.378	0.421223	0.0190333	22.1308	1.59719e-108	4.41223e-108		ENSG00000034693	284.378	0.421223	0.0190333	22.1308	1.59719e-108	4.41223e-108		ENSG00000034693	284.378	0.137328	0.0939693	1.46141	0.143902	0.265043		ENSG00000034693	284.378	0.137328	0.0939693	1.46141	0.143902	0.265043
ENSG00000034713	5100.51	0.383597	0.123166	3.11448	0.00184272	0.00789627		ENSG00000034713	5100.51	-0.359542	0.0249038	-14.4372	3.01898e-47	6.24428e-47		ENSG00000034713	5100.51	-0.359542	0.0249038	-14.4372	3.01898e-47	6.24428e-47		ENSG00000034713	5100.51	0.383597	0.123166	3.11448	0.00184272	0.00789627		ENSG00000034713	5100.51	0.383597	0.123166	3.11448	0.00184272	0.00789627
ENSG00000034971	5.66293	-0.498915	0.500563	-0.996707	0.318907	0.482585		ENSG00000034971	5.66293	-1.44305	0.0956173	-15.0919	1.83052e-51	3.88279e-51		ENSG00000034971	5.66293	-1.44305	0.0956173	-15.0919	1.83052e-51	3.88279e-51		ENSG00000034971	5.66293	-0.498915	0.500563	-0.996707	0.318907	0.482585		ENSG00000034971	5.66293	-0.498915	0.500563	-0.996707	0.318907	0.482585
ENSG00000035115	1046.52	-0.178644	0.082992	-2.15254	0.0313548	0.0807348		ENSG00000035115	1046.52	-0.418513	0.0167446	-24.9939	7.11492e-138	2.20293e-137		ENSG00000035115	1046.52	-0.418513	0.0167446	-24.9939	7.11492e-138	2.20293e-137		ENSG00000035115	1046.52	-0.178644	0.082992	-2.15254	0.0313548	0.0807348		ENSG00000035115	1046.52	-0.178644	0.082992	-2.15254	0.0313548	0.0807348
ENSG00000035141	560.747	0.0771411	0.105666	0.730049	0.46536	0.633857		ENSG00000035141	560.747	0.487995	0.0213748	22.8304	2.28633e-115	6.50698e-115		ENSG00000035141	560.747	0.487995	0.0213748	22.8304	2.28633e-115	6.50698e-115		ENSG00000035141	560.747	0.0771411	0.105666	0.730049	0.46536	0.633857		ENSG00000035141	560.747	0.0771411	0.105666	0.730049	0.46536	0.633857
ENSG00000035403	1494.99	0.13744	0.144909	0.948461	0.342895	0.509096		ENSG00000035403	1494.99	1.33888	0.029304	45.6893	0	0		ENSG00000035403	1494.99	1.33888	0.029304	45.6893	0	0		ENSG00000035403	1494.99	0.13744	0.144909	0.948461	0.342895	0.509096		ENSG00000035403	1494.99	0.13744	0.144909	0.948461	0.342895	0.509096
ENSG00000035499	42.7857	-0.226719	0.298129	-0.760473	0.446972	0.616107		ENSG00000035499	42.7857	3.4992	0.0605449	57.7952	0	0		ENSG00000035499	42.7857	3.4992	0.0605449	57.7952	0	0		ENSG00000035499	42.7857	-0.226719	0.298129	-0.760473	0.446972	0.616107		ENSG00000035499	42.7857	-0.226719	0.298129	-0.760473	0.446972	0.616107
ENSG00000035664	306.419	0.152985	0.242707	0.630327	0.528481	0.693404		ENSG00000035664	306.419	-1.02898	0.0490605	-20.9736	1.1419e-97	3.01716e-97		ENSG00000035664	306.419	-1.02898	0.0490605	-20.9736	1.1419e-97	3.01716e-97		ENSG00000035664	306.419	0.152985	0.242707	0.630327	0.528481	0.693404		ENSG00000035664	306.419	0.152985	0.242707	0.630327	0.528481	0.693404
ENSG00000035681	861.653	0.0225571	0.108403	0.208085	0.835163	0.937414		ENSG00000035681	861.653	0.576207	0.0219218	26.2846	2.87467e-152	9.38388e-152		ENSG00000035681	861.653	0.576207	0.0219218	26.2846	2.87467e-152	9.38388e-152		ENSG00000035681	861.653	0.0225571	0.108403	0.208085	0.835163	0.937414		ENSG00000035681	861.653	0.0225571	0.108403	0.208085	0.835163	0.937414
ENSG00000035687	999.854	0.138092	0.127312	1.08467	0.278066	0.436112		ENSG00000035687	999.854	-0.294914	0.025741	-11.457	2.16936e-30	4.03034e-30		ENSG00000035687	999.854	-0.294914	0.025741	-11.457	2.16936e-30	4.03034e-30		ENSG00000035687	999.854	0.138092	0.127312	1.08467	0.278066	0.436112		ENSG00000035687	999.854	0.138092	0.127312	1.08467	0.278066	0.436112
ENSG00000035720	4.01809	-0.0826159	0.520034	-0.158866	0.873774	0.963808		ENSG00000035720	4.01809	1.03642	0.105388	9.83436	8.00748e-23	1.40475e-22		ENSG00000035720	4.01809	1.03642	0.105388	9.83436	8.00748e-23	1.40475e-22		ENSG00000035720	4.01809	-0.0826159	0.520034	-0.158866	0.873774	0.963808		ENSG00000035720	4.01809	-0.0826159	0.520034	-0.158866	0.873774	0.963808
ENSG00000035862	6581.91	0.899328	0.256567	3.50524	0.0004562	0.00246305		ENSG00000035862	6581.91	0.533626	0.0518725	10.2873	8.04328e-25	1.43435e-24		ENSG00000035862	6581.91	0.533626	0.0518725	10.2873	8.04328e-25	1.43435e-24		ENSG00000035862	6581.91	0.899328	0.256567	3.50524	0.000456199	0.00246305		ENSG00000035862	6581.91	0.899328	0.256567	3.50524	0.000456199	0.00246305
ENSG00000035928	1171.52	-0.0995008	0.0958202	-1.03841	0.299079	0.460123		ENSG00000035928	1171.52	0.875936	0.0193748	45.21	0	0		ENSG00000035928	1171.52	0.875936	0.0193748	45.21	0	0		ENSG00000035928	1171.52	-0.0995008	0.0958202	-1.03841	0.299079	0.460123		ENSG00000035928	1171.52	-0.0995008	0.0958202	-1.03841	0.299079	0.460123
ENSG00000036054	759.434	0.149656	0.092287	1.62164	0.104881	0.208367		ENSG00000036054	759.434	0.906085	0.0186779	48.5112	0	0		ENSG00000036054	759.434	0.906085	0.0186779	48.5112	0	0		ENSG00000036054	759.434	0.149656	0.092287	1.62164	0.104881	0.208367		ENSG00000036054	759.434	0.149656	0.092287	1.62164	0.104881	0.208367
ENSG00000036257	1598.85	0.0879591	0.0740466	1.18789	0.234877	0.384889		ENSG00000036257	1598.85	-0.139773	0.0149708	-9.33637	9.96917e-21	1.71885e-20		ENSG00000036257	1598.85	-0.139773	0.0149708	-9.33637	9.96917e-21	1.71885e-20		ENSG00000036257	1598.85	0.0879591	0.0740466	1.18789	0.234877	0.384889		ENSG00000036257	1598.85	0.0879591	0.0740466	1.18789	0.234877	0.384889
ENSG00000036448	457.872	-0.0947309	0.204464	-0.463314	0.64314	0.794496		ENSG00000036448	457.872	-0.619095	0.0413086	-14.9871	8.91976e-51	1.8838e-50		ENSG00000036448	457.872	-0.619095	0.0413086	-14.9871	8.91976e-51	1.8838e-50		ENSG00000036448	457.872	-0.0947309	0.204464	-0.463314	0.64314	0.794496		ENSG00000036448	457.872	-0.0947309	0.204464	-0.463314	0.64314	0.794496
ENSG00000036473	5.19134	-0.0312938	0.337431	-0.0927415	0.926109	0.996702		ENSG00000036473	5.19134	-0.222634	0.0675018	-3.2982	0.000973069	0.00133102		ENSG00000036473	5.19134	-0.222634	0.0675018	-3.2982	0.000973069	0.00133102		ENSG00000036473	5.19134	-0.0312938	0.337431	-0.0927415	0.926109	0.996702		ENSG00000036473	5.19134	-0.0312938	0.337431	-0.0927415	0.926109	0.996702
ENSG00000036530	3057.56	0.605959	0.357164	1.69658	0.0897757	0.184877		ENSG00000036530	3057.56	-3.42854	0.0722213	-47.4726	0	0		ENSG00000036530	3057.56	-3.42854	0.0722213	-47.4726	0	0		ENSG00000036530	3057.56	0.605959	0.357164	1.69658	0.0897757	0.184877		ENSG00000036530	3057.56	0.605959	0.357164	1.69658	0.0897757	0.184877
ENSG00000036549	823.838	-0.384036	0.101832	-3.77128	0.00016241	0.00103477		ENSG00000036549	823.838	1.03414	0.0205773	50.2564	0	0		ENSG00000036549	823.838	1.03414	0.0205773	50.2564	0	0		ENSG00000036549	823.838	-0.384036	0.101832	-3.77128	0.000162411	0.00103477		ENSG00000036549	823.838	-0.384036	0.101832	-3.77128	0.000162411	0.00103477
ENSG00000036565	9.345	-0.99777	0.616626	-1.61811	0.105639	0.209447		ENSG00000036565	9.345	2.54966	0.124596	20.4634	4.55955e-93	1.18147e-92		ENSG00000036565	9.345	2.54966	0.124596	20.4634	4.55955e-93	1.18147e-92		ENSG00000036565	9.345	-0.99777	0.616626	-1.61811	0.105639	0.209447		ENSG00000036565	9.345	-0.99777	0.616626	-1.61811	0.105639	0.209447
ENSG00000036672	953.76	-0.0828676	0.200782	-0.412725	0.679808	0.824488		ENSG00000036672	953.76	-0.762269	0.0405769	-18.7858	9.87315e-79	2.40271e-78		ENSG00000036672	953.76	-0.762269	0.0405769	-18.7858	9.87315e-79	2.40271e-78		ENSG00000036672	953.76	-0.0828676	0.200782	-0.412725	0.679808	0.824488		ENSG00000036672	953.76	-0.0828676	0.200782	-0.412725	0.679808	0.824488
ENSG00000036828	3.71717	0.0646312	0.822948	0.0785361	0.937402	1		ENSG00000036828	3.71717	-0.646876	0.166043	-3.89584	9.78588e-05	0.000137201		ENSG00000036828	3.71717	-0.646876	0.166043	-3.89584	9.78588e-05	0.000137201		ENSG00000036828	3.71717	0.0646312	0.822948	0.0785362	0.937402	1		ENSG00000036828	3.71717	0.0646312	0.822948	0.0785362	0.937402	1
ENSG00000037042	2952.19	0.142027	0.125729	1.12963	0.258633	0.413316		ENSG00000037042	2952.19	-1.67403	0.025413	-65.8729	0	0		ENSG00000037042	2952.19	-1.67403	0.025413	-65.8729	0	0		ENSG00000037042	2952.19	0.142027	0.125729	1.12963	0.258633	0.413316		ENSG00000037042	2952.19	0.142027	0.125729	1.12963	0.258633	0.413316
ENSG00000037241	277.913	0.256452	0.138216	1.85544	0.0635329	0.141355		ENSG00000037241	277.913	1.48396	0.0279984	53.0016	0	0		ENSG00000037241	277.913	1.48396	0.0279984	53.0016	0	0		ENSG00000037241	277.913	0.256452	0.138216	1.85544	0.0635329	0.141355		ENSG00000037241	277.913	0.256452	0.138216	1.85544	0.0635329	0.141355
ENSG00000037280	329.784	-0.77571	0.342328	-2.26599	0.0234523	0.0640011		ENSG00000037280	329.784	0.54473	0.0691636	7.87596	3.38128e-15	5.52415e-15		ENSG00000037280	329.784	0.54473	0.0691636	7.87596	3.38128e-15	5.52415e-15		ENSG00000037280	329.784	-0.77571	0.342328	-2.26599	0.0234523	0.0640011		ENSG00000037280	329.784	-0.77571	0.342328	-2.26599	0.0234523	0.0640011
ENSG00000037474	1151.89	-0.0800756	0.123341	-0.64922	0.516196	0.68245		ENSG00000037474	1151.89	0.147106	0.0249311	5.90051	3.62387e-09	5.50387e-09		ENSG00000037474	1151.89	0.147106	0.0249311	5.90051	3.62387e-09	5.50387e-09		ENSG00000037474	1151.89	-0.0800756	0.123341	-0.64922	0.516196	0.68245		ENSG00000037474	1151.89	-0.0800756	0.123341	-0.64922	0.516196	0.68245
ENSG00000037637	981.718	-0.133584	0.133993	-0.996943	0.318792	0.48247		ENSG00000037637	981.718	0.577723	0.0270873	21.3282	6.21374e-101	1.6627e-100		ENSG00000037637	981.718	0.577723	0.0270873	21.3282	6.21374e-101	1.6627e-100		ENSG00000037637	981.718	-0.133584	0.133993	-0.996943	0.318792	0.48247		ENSG00000037637	981.718	-0.133584	0.133993	-0.996943	0.318792	0.48247
ENSG00000037749	248.114	-0.416193	0.185129	-2.24812	0.0245685	0.0664996		ENSG00000037749	248.114	2.21989	0.0374495	59.2769	0	0		ENSG00000037749	248.114	2.21989	0.0374495	59.2769	0	0		ENSG00000037749	248.114	-0.416193	0.185129	-2.24812	0.0245685	0.0664996		ENSG00000037749	248.114	-0.416193	0.185129	-2.24812	0.0245685	0.0664996
ENSG00000037757	793.721	-0.112931	0.148801	-0.758937	0.44789	0.616833		ENSG00000037757	793.721	-1.13147	0.0300432	-37.6615	0	0		ENSG00000037757	793.721	-1.13147	0.0300432	-37.6615	0	0		ENSG00000037757	793.721	-0.112931	0.148801	-0.758937	0.44789	0.616833		ENSG00000037757	793.721	-0.112931	0.148801	-0.758937	0.44789	0.616833
ENSG00000037897	229.884	-0.65076	0.23287	-2.79453	0.00519758	0.0187073		ENSG00000037897	229.884	2.61261	0.047097	55.4729	0	0		ENSG00000037897	229.884	2.61261	0.047097	55.4729	0	0		ENSG00000037897	229.884	-0.65076	0.23287	-2.79453	0.00519758	0.0187073		ENSG00000037897	229.884	-0.65076	0.23287	-2.79453	0.00519758	0.0187073
ENSG00000037965	4.45296	-0.554217	0.662544	-0.836497	0.402875	0.571877		ENSG00000037965	4.45296	5.48684	0.137309	39.9599	0	0		ENSG00000037965	4.45296	5.48684	0.137309	39.9599	0	0		ENSG00000037965	4.45296	-0.554217	0.662544	-0.836497	0.402875	0.571877		ENSG00000037965	4.45296	-0.554217	0.662544	-0.836497	0.402875	0.571877
ENSG00000038002	315.777	0.133662	0.216559	0.617207	0.537098	0.701024		ENSG00000038002	315.777	1.26456	0.0438057	28.8676	3.04724e-183	1.10659e-182		ENSG00000038002	315.777	1.26456	0.0438057	28.8676	3.04724e-183	1.10659e-182		ENSG00000038002	315.777	0.133662	0.216559	0.617207	0.537098	0.701024		ENSG00000038002	315.777	0.133662	0.216559	0.617207	0.537098	0.701024
ENSG00000038210	202.343	0.403543	0.133029	3.03349	0.0024174	0.00985644		ENSG00000038210	202.343	1.17948	0.0269832	43.7115	0	0		ENSG00000038210	202.343	1.17948	0.0269832	43.7115	0	0		ENSG00000038210	202.343	0.403543	0.133029	3.03349	0.0024174	0.00985644		ENSG00000038210	202.343	0.403543	0.133029	3.03349	0.0024174	0.00985644
ENSG00000038219	1660.25	-0.405648	0.150563	-2.69421	0.00705564	0.0241164		ENSG00000038219	1660.25	0.20588	0.030427	6.76636	1.32063e-11	2.07094e-11		ENSG00000038219	1660.25	0.20588	0.030427	6.76636	1.32063e-11	2.07094e-11		ENSG00000038219	1660.25	-0.405648	0.150563	-2.69421	0.00705564	0.0241164		ENSG00000038219	1660.25	-0.405648	0.150563	-2.69421	0.00705564	0.0241164
ENSG00000038274	1454.52	0.412868	0.107063	3.85632	0.0001151	0.00077578		ENSG00000038274	1454.52	0.288381	0.0216596	13.3142	1.91409e-40	3.80268e-40		ENSG00000038274	1454.52	0.288381	0.0216596	13.3142	1.91409e-40	3.80268e-40		ENSG00000038274	1454.52	0.412868	0.107063	3.85632	0.000115105	0.000775778		ENSG00000038274	1454.52	0.412868	0.107063	3.85632	0.000115105	0.000775778
ENSG00000038295	185.09	-1.29318	0.537569	-2.4056	0.0161459	0.0474233		ENSG00000038295	185.09	-2.18646	0.107959	-20.2527	3.36252e-91	8.64428e-91		ENSG00000038295	185.09	-2.18646	0.107959	-20.2527	3.36252e-91	8.64428e-91		ENSG00000038295	185.09	-1.29318	0.537569	-2.4056	0.0161459	0.0474233		ENSG00000038295	185.09	-1.29318	0.537569	-2.4056	0.0161459	0.0474233
ENSG00000038358	2162.79	-0.512572	0.180529	-2.83928	0.00452151	0.0166522		ENSG00000038358	2162.79	-0.76703	0.0364738	-21.0296	3.5162e-98	9.31117e-98		ENSG00000038358	2162.79	-0.76703	0.0364738	-21.0296	3.5162e-98	9.31117e-98		ENSG00000038358	2162.79	-0.512572	0.180529	-2.83928	0.00452151	0.0166522		ENSG00000038358	2162.79	-0.512572	0.180529	-2.83928	0.00452151	0.0166522
ENSG00000038382	3980.76	-0.69148	0.206567	-3.34748	0.00081549	0.00400972		ENSG00000038382	3980.76	1.55254	0.0417601	37.1776	1.56861e-302	8.10317e-302		ENSG00000038382	3980.76	1.55254	0.0417601	37.1776	1.56861e-302	8.10317e-302		ENSG00000038382	3980.76	-0.69148	0.206567	-3.34748	0.000815489	0.00400972		ENSG00000038382	3980.76	-0.69148	0.206567	-3.34748	0.000815489	0.00400972
ENSG00000038427	3469.94	-0.847156	0.254364	-3.33049	0.00086693	0.00421886		ENSG00000038427	3469.94	3.42807	0.051427	66.659	0	0		ENSG00000038427	3469.94	3.42807	0.051427	66.659	0	0		ENSG00000038427	3469.94	-0.847156	0.254364	-3.33049	0.00086693	0.00421886		ENSG00000038427	3469.94	-0.847156	0.254364	-3.33049	0.00086693	0.00421886
ENSG00000038532	1372.19	-0.345262	0.110171	-3.13388	0.00172509	0.00748174		ENSG00000038532	1372.19	-0.0296539	0.0222512	-1.33269	0.182634	0.226848		ENSG00000038532	1372.19	-0.0296539	0.0222512	-1.33269	0.182634	0.226848		ENSG00000038532	1372.19	-0.345262	0.110171	-3.13388	0.00172509	0.00748174		ENSG00000038532	1372.19	-0.345262	0.110171	-3.13388	0.00172509	0.00748174
ENSG00000038945	459.249	0.323477	0.44636	0.724699	0.468637	0.636902		ENSG00000038945	459.249	4.09187	0.0902684	45.3301	0	0		ENSG00000038945	459.249	4.09187	0.0902684	45.3301	0	0		ENSG00000038945	459.249	0.323477	0.44636	0.724699	0.468637	0.636902		ENSG00000038945	459.249	0.323477	0.44636	0.724699	0.468637	0.636902
ENSG00000039068	94.1394	-1.3373	0.356714	-3.74894	0.00017758	0.00111626		ENSG00000039068	94.1394	0.722046	0.0718192	10.0537	8.85094e-24	1.56487e-23		ENSG00000039068	94.1394	0.722046	0.0718192	10.0537	8.85094e-24	1.56487e-23		ENSG00000039068	94.1394	-1.3373	0.356714	-3.74894	0.000177583	0.00111626		ENSG00000039068	94.1394	-1.3373	0.356714	-3.74894	0.000177583	0.00111626
ENSG00000039123	1527.82	-0.108854	0.0801631	-1.3579	0.174494	0.307134		ENSG00000039123	1527.82	-0.0436232	0.0161961	-2.69345	0.00707178	0.00942395		ENSG00000039123	1527.82	-0.0436232	0.0161961	-2.69345	0.00707178	0.00942395		ENSG00000039123	1527.82	-0.108854	0.0801631	-1.3579	0.174494	0.307134		ENSG00000039123	1527.82	-0.108854	0.0801631	-1.3579	0.174494	0.307134
ENSG00000039139	128.886	-1.08379	0.358898	-3.01978	0.00252955	0.0102369		ENSG00000039139	128.886	1.23911	0.0724571	17.1012	1.4528e-65	3.31926e-65		ENSG00000039139	128.886	1.23911	0.0724571	17.1012	1.4528e-65	3.31926e-65		ENSG00000039139	128.886	-1.08379	0.358898	-3.01978	0.00252955	0.0102369		ENSG00000039139	128.886	-1.08379	0.358898	-3.01978	0.00252955	0.0102369
ENSG00000039319	2107.22	-0.672123	0.181691	-3.69926	0.00021623	0.00131781		ENSG00000039319	2107.22	-0.4571	0.0367076	-12.4525	1.35588e-35	2.61033e-35		ENSG00000039319	2107.22	-0.4571	0.0367076	-12.4525	1.35588e-35	2.61033e-35		ENSG00000039319	2107.22	-0.672123	0.181691	-3.69926	0.00021623	0.00131781		ENSG00000039319	2107.22	-0.672123	0.181691	-3.69926	0.00021623	0.00131781
ENSG00000039523	3050.5	0.538812	0.140879	3.82466	0.00013095	0.0008615		ENSG00000039523	3050.5	-1.65045	0.0284923	-57.926	0	0		ENSG00000039523	3050.5	-1.65045	0.0284923	-57.926	0	0		ENSG00000039523	3050.5	0.538812	0.140879	3.82466	0.000130953	0.000861502		ENSG00000039523	3050.5	0.538812	0.140879	3.82466	0.000130953	0.000861502
ENSG00000039537	10.8727	0.855008	0.515793	1.65766	0.0973869	0.196656		ENSG00000039537	10.8727	0.524656	0.104957	4.99878	5.76946e-07	8.4615e-07		ENSG00000039537	10.8727	0.524656	0.104957	4.99878	5.76946e-07	8.4615e-07		ENSG00000039537	10.8727	0.855008	0.515793	1.65766	0.0973869	0.196656		ENSG00000039537	10.8727	0.855008	0.515793	1.65766	0.0973869	0.196656
ENSG00000039560	657.045	0.359226	0.290899	1.23488	0.216874	0.362618		ENSG00000039560	657.045	0.860023	0.0588225	14.6206	2.07438e-48	4.32151e-48		ENSG00000039560	657.045	0.860023	0.0588225	14.6206	2.07438e-48	4.32151e-48		ENSG00000039560	657.045	0.359226	0.290899	1.23488	0.216874	0.362618		ENSG00000039560	657.045	0.359226	0.290899	1.23488	0.216874	0.362618
ENSG00000039600	3.98819	0.698039	0.327789	2.12953	0.03321	0.0845481		ENSG00000039600	3.98819	0.321908	0.0686759	4.68734	2.76773e-06	4.00745e-06		ENSG00000039600	3.98819	0.321908	0.0686759	4.68734	2.76773e-06	4.00745e-06		ENSG00000039600	3.98819	0.698039	0.327789	2.12953	0.03321	0.0845481		ENSG00000039600	3.98819	0.698039	0.327789	2.12953	0.03321	0.0845481
ENSG00000039650	1839.95	-0.20403	0.101092	-2.01826	0.0435646	0.104999		ENSG00000039650	1839.95	-1.37919	0.0203963	-67.6196	0	0		ENSG00000039650	1839.95	-1.37919	0.0203963	-67.6196	0	0		ENSG00000039650	1839.95	-0.20403	0.101092	-2.01826	0.0435646	0.104999		ENSG00000039650	1839.95	-0.20403	0.101092	-2.01826	0.0435646	0.104999
ENSG00000039987	3.5797	-0.946283	0.395419	-2.39312	0.016706	0.0487586		ENSG00000039987	3.5797	0.91207	0.0763828	11.9408	7.25506e-33	1.37095e-32		ENSG00000039987	3.5797	0.91207	0.0763828	11.9408	7.25506e-33	1.37095e-32		ENSG00000039987	3.5797	-0.946283	0.395419	-2.39312	0.016706	0.0487586		ENSG00000039987	3.5797	-0.946283	0.395419	-2.39312	0.016706	0.0487586
ENSG00000040199	943.85	-0.550521	0.172352	-3.19418	0.00140231	0.00629054		ENSG00000040199	943.85	-0.449916	0.0347969	-12.9298	3.05703e-38	5.98551e-38		ENSG00000040199	943.85	-0.449916	0.0347969	-12.9298	3.05703e-38	5.98551e-38		ENSG00000040199	943.85	-0.550521	0.172352	-3.19418	0.00140231	0.00629054		ENSG00000040199	943.85	-0.550521	0.172352	-3.19418	0.00140231	0.00629054
ENSG00000040275	327.453	-0.0822185	0.197003	-0.417347	0.676425	0.82181		ENSG00000040275	327.453	0.441531	0.0398248	11.0868	1.45358e-28	2.66542e-28		ENSG00000040275	327.453	0.441531	0.0398248	11.0868	1.45358e-28	2.66542e-28		ENSG00000040275	327.453	-0.0822185	0.197003	-0.417347	0.676425	0.82181		ENSG00000040275	327.453	-0.0822185	0.197003	-0.417347	0.676425	0.82181
ENSG00000040341	1550.09	0.00491216	0.174465	0.0281556	0.977538	1		ENSG00000040341	1550.09	-0.584465	0.0352664	-16.5729	1.09488e-61	2.45212e-61		ENSG00000040341	1550.09	-0.584465	0.0352664	-16.5729	1.09488e-61	2.45212e-61		ENSG00000040341	1550.09	0.00491216	0.174465	0.0281556	0.977538	1		ENSG00000040341	1550.09	0.00491216	0.174465	0.0281556	0.977538	1
ENSG00000040487	544.576	-0.0120014	0.147578	-0.0813224	0.935186	1		ENSG00000040487	544.576	0.25253	0.029835	8.46422	2.57865e-17	4.30785e-17		ENSG00000040487	544.576	0.25253	0.029835	8.46422	2.57865e-17	4.30785e-17		ENSG00000040487	544.576	-0.0120014	0.147578	-0.0813224	0.935186	1		ENSG00000040487	544.576	-0.0120014	0.147578	-0.0813224	0.935186	1
ENSG00000040531	423.712	-0.0205043	0.132888	-0.154297	0.877375	0.966401		ENSG00000040531	423.712	1.1299	0.0268829	42.0305	0	0		ENSG00000040531	423.712	1.1299	0.0268829	42.0305	0	0		ENSG00000040531	423.712	-0.0205043	0.132888	-0.154297	0.877375	0.966401		ENSG00000040531	423.712	-0.0205043	0.132888	-0.154297	0.877375	0.966401
ENSG00000040608	1007.71	0.585561	0.398674	1.46877	0.141895	0.262333		ENSG00000040608	1007.71	-3.14353	0.0806285	-38.9878	0	0		ENSG00000040608	1007.71	-3.14353	0.0806285	-38.9878	0	0		ENSG00000040608	1007.71	0.585561	0.398674	1.46877	0.141895	0.262333		ENSG00000040608	1007.71	0.585561	0.398674	1.46877	0.141895	0.262333
ENSG00000040633	726.675	0.119552	0.101936	1.17281	0.24087	0.39207		ENSG00000040633	726.675	0.799129	0.0206248	38.746	0	0		ENSG00000040633	726.675	0.799129	0.0206248	38.746	0	0		ENSG00000040633	726.675	0.119552	0.101936	1.17281	0.24087	0.39207		ENSG00000040633	726.675	0.119552	0.101936	1.17281	0.24087	0.39207
ENSG00000040731	635.178	-0.802966	0.275979	-2.90952	0.0036198	0.0138453		ENSG00000040731	635.178	-0.146159	0.0557417	-2.62208	0.00873954	0.0116114		ENSG00000040731	635.178	-0.146159	0.0557417	-2.62208	0.00873954	0.0116114		ENSG00000040731	635.178	-0.802966	0.275979	-2.90952	0.0036198	0.0138453		ENSG00000040731	635.178	-0.802966	0.275979	-2.90952	0.0036198	0.0138453
ENSG00000040933	2159.79	-0.361823	0.191195	-1.89243	0.0584336	0.132472		ENSG00000040933	2159.79	-0.228798	0.0386436	-5.92073	3.20514e-09	4.87151e-09		ENSG00000040933	2159.79	-0.228798	0.0386436	-5.92073	3.20514e-09	4.87151e-09		ENSG00000040933	2159.79	-0.361823	0.191195	-1.89243	0.0584336	0.132472		ENSG00000040933	2159.79	-0.361823	0.191195	-1.89243	0.0584336	0.132472
ENSG00000041353	324.315	0.168169	0.455807	0.368947	0.712167	0.849214		ENSG00000041353	324.315	-0.424095	0.0921535	-4.60205	4.18344e-06	6.03508e-06		ENSG00000041353	324.315	-0.424095	0.0921535	-4.60205	4.18344e-06	6.03508e-06		ENSG00000041353	324.315	0.168169	0.455808	0.368947	0.712167	0.849214		ENSG00000041353	324.315	0.168169	0.455808	0.368947	0.712167	0.849214
ENSG00000041357	1431.04	0.583654	0.0960375	6.07735	1.22e-09	4.34e-08		ENSG00000041357	1431.04	0.5938	0.0194374	30.5494	5.76477e-205	2.24876e-204		ENSG00000041357	1431.04	0.5938	0.0194374	30.5494	5.76477e-205	2.24876e-204		ENSG00000041357	1431.04	0.583654	0.0960375	6.07735	1.22181e-09	4.33699e-08		ENSG00000041357	1431.04	0.583654	0.0960375	6.07735	1.22181e-09	4.33699e-08
ENSG00000041515	220.079	-1.20111	0.279859	-4.29184	1.77e-05	0.00015846		ENSG00000041515	220.079	1.36873	0.056497	24.2267	1.16519e-129	3.49386e-129		ENSG00000041515	220.079	1.36873	0.056497	24.2267	1.16519e-129	3.49386e-129		ENSG00000041515	220.079	-1.20111	0.279859	-4.29184	1.77201e-05	0.000158463		ENSG00000041515	220.079	-1.20111	0.279859	-4.29184	1.77201e-05	0.000158463
ENSG00000041802	781.713	-0.129434	0.0942562	-1.37321	0.169687	0.300595		ENSG00000041802	781.713	1.12977	0.0190627	59.2658	0	0		ENSG00000041802	781.713	1.12977	0.0190627	59.2658	0	0		ENSG00000041802	781.713	-0.129433	0.0942562	-1.37321	0.169687	0.300595		ENSG00000041802	781.713	-0.129433	0.0942562	-1.37321	0.169687	0.300595
ENSG00000041880	630.222	-0.0722249	0.157018	-0.459979	0.645531	0.796378		ENSG00000041880	630.222	0.386637	0.0317419	12.1807	3.94074e-34	7.51037e-34		ENSG00000041880	630.222	0.386637	0.0317419	12.1807	3.94074e-34	7.51037e-34		ENSG00000041880	630.222	-0.0722249	0.157018	-0.45998	0.645531	0.796378		ENSG00000041880	630.222	-0.0722249	0.157018	-0.45998	0.645531	0.796378
ENSG00000041982	4143.84	0.0646548	0.494822	0.130663	0.896042	0.978447		ENSG00000041982	4143.84	6.30671	0.100048	63.037	0	0		ENSG00000041982	4143.84	6.30671	0.100048	63.037	0	0		ENSG00000041982	4143.84	0.0646548	0.494822	0.130663	0.896042	0.978447		ENSG00000041982	4143.84	0.0646548	0.494822	0.130663	0.896042	0.978447
ENSG00000041988	1292.84	-0.222424	0.0982295	-2.26433	0.0235536	0.0642451		ENSG00000041988	1292.84	-1.21753	0.0198032	-61.4812	0	0		ENSG00000041988	1292.84	-1.21753	0.0198032	-61.4812	0	0		ENSG00000041988	1292.84	-0.222424	0.0982295	-2.26433	0.0235536	0.0642451		ENSG00000041988	1292.84	-0.222424	0.0982295	-2.26433	0.0235536	0.0642451
ENSG00000042062	238.507	-0.0630671	0.290639	-0.216994	0.828213	0.932608		ENSG00000042062	238.507	0.713652	0.0587627	12.1446	6.1258e-34	1.16554e-33		ENSG00000042062	238.507	0.713652	0.0587627	12.1446	6.1258e-34	1.16554e-33		ENSG00000042062	238.507	-0.0630671	0.290639	-0.216994	0.828213	0.932608		ENSG00000042062	238.507	-0.0630671	0.290639	-0.216994	0.828213	0.932608
ENSG00000042088	298.265	-0.117284	0.108299	-1.08297	0.278824	0.436927		ENSG00000042088	298.265	1.04996	0.0219085	47.9247	0	0		ENSG00000042088	298.265	1.04996	0.0219085	47.9247	0	0		ENSG00000042088	298.265	-0.117284	0.108299	-1.08297	0.278824	0.436927		ENSG00000042088	298.265	-0.117284	0.108299	-1.08297	0.278824	0.436927
ENSG00000042286	444.46	0.536021	0.137709	3.89243	9.92e-05	0.00068599		ENSG00000042286	444.46	-0.823372	0.0278972	-29.5145	1.87756e-191	7.01478e-191		ENSG00000042286	444.46	-0.823372	0.0278972	-29.5145	1.87756e-191	7.01478e-191		ENSG00000042286	444.46	0.536021	0.137709	3.89243	9.9245e-05	0.000685995		ENSG00000042286	444.46	0.536021	0.137709	3.89243	9.9245e-05	0.000685995
ENSG00000042304	3.23937	-1.17917	0.466044	-2.53018	0.0114005	0.0358511		ENSG00000042304	3.23937	0.650774	0.0881947	7.37884	1.59676e-13	2.55931e-13		ENSG00000042304	3.23937	0.650774	0.0881947	7.37884	1.59676e-13	2.55931e-13		ENSG00000042304	3.23937	-1.17917	0.466044	-2.53018	0.0114005	0.035851		ENSG00000042304	3.23937	-1.17917	0.466044	-2.53018	0.0114005	0.035851
ENSG00000042317	417.975	-0.145486	0.146986	-0.989795	0.322274	0.486248		ENSG00000042317	417.975	-0.0792684	0.0296888	-2.66997	0.0075857	0.0100978		ENSG00000042317	417.975	-0.0792684	0.0296888	-2.66997	0.0075857	0.0100978		ENSG00000042317	417.975	-0.145486	0.146986	-0.989795	0.322274	0.486248		ENSG00000042317	417.975	-0.145486	0.146986	-0.989795	0.322274	0.486248
ENSG00000042429	562.474	-0.650979	0.140165	-4.64436	3.41e-06	3.96e-05		ENSG00000042429	562.474	-1.55323	0.0280711	-55.3321	0	0		ENSG00000042429	562.474	-1.55323	0.0280711	-55.3321	0	0		ENSG00000042429	562.474	-0.650979	0.140165	-4.64436	3.4113e-06	3.95867e-05		ENSG00000042429	562.474	-0.650979	0.140165	-4.64436	3.4113e-06	3.95867e-05
ENSG00000042445	1379.12	-0.007585	0.120995	-0.0626885	0.950015	1		ENSG00000042445	1379.12	0.639886	0.0244645	26.1557	8.49539e-151	2.75765e-150		ENSG00000042445	1379.12	0.639886	0.0244645	26.1557	8.49539e-151	2.75765e-150		ENSG00000042445	1379.12	-0.00758503	0.120995	-0.0626885	0.950015	1		ENSG00000042445	1379.12	-0.00758503	0.120995	-0.0626885	0.950015	1
ENSG00000042493	1005.09	0.338099	0.303602	1.11363	0.26544	0.421609		ENSG00000042493	1005.09	2.46867	0.0613891	40.2135	0	0		ENSG00000042493	1005.09	2.46867	0.0613891	40.2135	0	0		ENSG00000042493	1005.09	0.338099	0.303602	1.11363	0.26544	0.421609		ENSG00000042493	1005.09	0.338099	0.303602	1.11363	0.26544	0.421609
ENSG00000042753	1700.13	0.331714	0.159796	2.07587	0.0379061	0.0939675		ENSG00000042753	1700.13	0.492612	0.0323131	15.245	1.77838e-52	3.79266e-52		ENSG00000042753	1700.13	0.492612	0.0323131	15.245	1.77838e-52	3.79266e-52		ENSG00000042753	1700.13	0.331714	0.159795	2.07587	0.0379061	0.0939675		ENSG00000042753	1700.13	0.331714	0.159795	2.07587	0.0379061	0.0939675
ENSG00000042781	22.7073	-1.43138	0.268383	-5.33334	9.64e-08	1.91e-06		ENSG00000042781	22.7073	0.739535	0.0524464	14.1008	3.7561e-45	7.67653e-45		ENSG00000042781	22.7073	0.739535	0.0524464	14.1008	3.7561e-45	7.67653e-45		ENSG00000042781	22.7073	-1.43138	0.268383	-5.33334	9.64233e-08	1.90644e-06		ENSG00000042781	22.7073	-1.43138	0.268383	-5.33334	9.64233e-08	1.90644e-06
ENSG00000042813	1.87269	-1.66283	0.685218	-2.42672	0.015236	0.0452936		ENSG00000042813	1.87269	-0.256695	0.116734	-2.19898	0.0278791	0.0363151		ENSG00000042813	1.87269	-0.256695	0.116734	-2.19898	0.0278791	0.0363151		ENSG00000042813	1.87269	-1.66283	0.685218	-2.42672	0.015236	0.0452937		ENSG00000042813	1.87269	-1.66283	0.685218	-2.42672	0.015236	0.0452937
ENSG00000042832	160.732	-1.23372	0.458234	-2.69235	0.00709513	0.0242304		ENSG00000042832	160.732	-1.03802	0.0922281	-11.255	2.18882e-29	4.03593e-29		ENSG00000042832	160.732	-1.03802	0.0922281	-11.255	2.18882e-29	4.03593e-29		ENSG00000042832	160.732	-1.23372	0.458234	-2.69235	0.00709513	0.0242304		ENSG00000042832	160.732	-1.23372	0.458234	-2.69235	0.00709513	0.0242304
ENSG00000042980	297.992	-0.0816581	0.408573	-0.199862	0.841589	0.941389		ENSG00000042980	297.992	1.54839	0.082611	18.7431	2.20212e-78	5.35086e-78		ENSG00000042980	297.992	1.54839	0.082611	18.7431	2.20212e-78	5.35086e-78		ENSG00000042980	297.992	-0.0816581	0.408573	-0.199862	0.841589	0.941389		ENSG00000042980	297.992	-0.0816581	0.408573	-0.199862	0.841589	0.941389
ENSG00000043039	25.9011	1.05893	0.44377	2.38621	0.0170232	0.0495008		ENSG00000043039	25.9011	-2.08156	0.0909019	-22.899	4.75767e-116	1.35741e-115		ENSG00000043039	25.9011	-2.08156	0.0909019	-22.899	4.75767e-116	1.35741e-115		ENSG00000043039	25.9011	1.05893	0.44377	2.38621	0.0170232	0.0495008		ENSG00000043039	25.9011	1.05893	0.44377	2.38621	0.0170232	0.0495008
ENSG00000043093	948.465	0.0929119	0.0963528	0.964288	0.334901	0.500296		ENSG00000043093	948.465	0.142164	0.0194847	7.29617	2.96074e-13	4.72929e-13		ENSG00000043093	948.465	0.142164	0.0194847	7.29617	2.96074e-13	4.72929e-13		ENSG00000043093	948.465	0.0929119	0.0963528	0.964288	0.334901	0.500296		ENSG00000043093	948.465	0.0929119	0.0963528	0.964288	0.334901	0.500296
ENSG00000043143	1545.08	0.191644	0.146129	1.31147	0.189698	0.327527		ENSG00000043143	1545.08	-0.61199	0.0295447	-20.714	2.59011e-95	6.77817e-95		ENSG00000043143	1545.08	-0.61199	0.0295447	-20.714	2.59011e-95	6.77817e-95		ENSG00000043143	1545.08	0.191644	0.146129	1.31147	0.189698	0.327527		ENSG00000043143	1545.08	0.191644	0.146129	1.31147	0.189698	0.327527
ENSG00000043355	1634.49	0.0700745	0.547384	0.128017	0.898135	0.979374		ENSG00000043355	1634.49	-2.78861	0.110654	-25.2012	3.88867e-140	1.21509e-139		ENSG00000043355	1634.49	-2.78861	0.110654	-25.2012	3.88867e-140	1.21509e-139		ENSG00000043355	1634.49	0.0700745	0.547384	0.128017	0.898135	0.979374		ENSG00000043355	1634.49	0.0700745	0.547384	0.128017	0.898135	0.979374
ENSG00000043462	318.692	0.748924	0.31097	2.40835	0.0160249	0.0471213		ENSG00000043462	318.692	1.5819	0.0629019	25.1486	1.46401e-139	4.56388e-139		ENSG00000043462	318.692	1.5819	0.0629019	25.1486	1.46401e-139	4.56388e-139		ENSG00000043462	318.692	0.748924	0.31097	2.40835	0.0160249	0.0471213		ENSG00000043462	318.692	0.748924	0.31097	2.40835	0.0160249	0.0471213
ENSG00000043514	461.58	-0.341359	0.131216	-2.60151	0.00928133	0.0302607		ENSG00000043514	461.58	0.608224	0.026503	22.9492	1.49933e-116	4.2852e-116		ENSG00000043514	461.58	0.608224	0.026503	22.9492	1.49933e-116	4.2852e-116		ENSG00000043514	461.58	-0.341359	0.131216	-2.60151	0.00928133	0.0302607		ENSG00000043514	461.58	-0.341359	0.131216	-2.60151	0.00928133	0.0302607
ENSG00000043591	260.785	0.259951	0.357187	0.727771	0.466754	0.63501		ENSG00000043591	260.785	-1.69307	0.0722137	-23.4453	1.47668e-121	4.29727e-121		ENSG00000043591	260.785	-1.69307	0.0722137	-23.4453	1.47668e-121	4.29727e-121		ENSG00000043591	260.785	0.259951	0.357187	0.727771	0.466754	0.63501		ENSG00000043591	260.785	0.259951	0.357187	0.727771	0.466754	0.63501
ENSG00000044012	0.189042	0.216401	1.31566	0.164481	0.869353	0.960783		ENSG00000044012	0.189042	-1.01313	0.265988	-3.80892	0.000139573	0.000195009		ENSG00000044012	0.189042	-1.01313	0.265988	-3.80892	0.000139573	0.000195009		ENSG00000044012	0.189042	0.216401	1.31566	0.164481	0.869353	0.960783		ENSG00000044012	0.189042	0.216401	1.31566	0.164481	0.869353	0.960783
ENSG00000044090	933.72	0.0876965	0.213504	0.410748	0.681257	0.8257		ENSG00000044090	933.72	-0.242408	0.043164	-5.61598	1.95451e-08	2.93686e-08		ENSG00000044090	933.72	-0.242408	0.043164	-5.61598	1.95451e-08	2.93686e-08		ENSG00000044090	933.72	0.0876965	0.213504	0.410748	0.681257	0.8257		ENSG00000044090	933.72	0.0876965	0.213504	0.410748	0.681257	0.8257
ENSG00000044115	6075.67	0.0281943	0.174791	0.161303	0.871855	0.962559		ENSG00000044115	6075.67	1.13952	0.0353386	32.2458	4.02533e-228	1.68764e-227		ENSG00000044115	6075.67	1.13952	0.0353386	32.2458	4.02533e-228	1.68764e-227		ENSG00000044115	6075.67	0.0281943	0.174791	0.161303	0.871855	0.962559		ENSG00000044115	6075.67	0.0281943	0.174791	0.161303	0.871855	0.962559
ENSG00000044446	898.811	-0.309955	0.146941	-2.10938	0.0349115	0.0880099		ENSG00000044446	898.811	-0.699163	0.029664	-23.5694	7.94708e-123	2.32326e-122		ENSG00000044446	898.811	-0.699163	0.029664	-23.5694	7.94708e-123	2.32326e-122		ENSG00000044446	898.811	-0.309955	0.146941	-2.10938	0.0349115	0.0880099		ENSG00000044446	898.811	-0.309955	0.146941	-2.10938	0.0349115	0.0880099
ENSG00000044459	235.929	-0.126438	0.189726	-0.666423	0.505141	0.671879		ENSG00000044459	235.929	1.08556	0.0383673	28.2938	4.11779e-176	1.46052e-175		ENSG00000044459	235.929	1.08556	0.0383673	28.2938	4.11779e-176	1.46052e-175		ENSG00000044459	235.929	-0.126438	0.189726	-0.666423	0.505141	0.671879		ENSG00000044459	235.929	-0.126438	0.189726	-0.666423	0.505141	0.671879
ENSG00000044524	182.165	0.748749	0.273712	2.73554	0.00622781	0.0217558		ENSG00000044524	182.165	2.78972	0.0554138	50.3435	0	0		ENSG00000044524	182.165	2.78972	0.0554138	50.3435	0	0		ENSG00000044524	182.165	0.748749	0.273712	2.73554	0.00622781	0.0217558		ENSG00000044524	182.165	0.748749	0.273712	2.73554	0.00622781	0.0217558
ENSG00000044574	6546.83	0.921725	0.215397	4.2792	1.88e-05	0.00016652		ENSG00000044574	6546.83	1.05631	0.0435494	24.2555	5.78852e-130	1.73762e-129		ENSG00000044574	6546.83	1.05631	0.0435494	24.2555	5.78852e-130	1.73762e-129		ENSG00000044574	6546.83	0.921726	0.215397	4.2792	1.87568e-05	0.000166517		ENSG00000044574	6546.83	0.921726	0.215397	4.2792	1.87568e-05	0.000166517
ENSG00000046604	41.0154	0.432356	0.436841	0.989733	0.322305	0.48625		ENSG00000046604	41.0154	3.41093	0.0885549	38.5177	0	0		ENSG00000046604	41.0154	3.41093	0.0885549	38.5177	0	0		ENSG00000046604	41.0154	0.432356	0.436841	0.989733	0.322305	0.48625		ENSG00000046604	41.0154	0.432356	0.436841	0.989733	0.322305	0.48625
ENSG00000046647	428.197	0.071551	0.120611	0.593238	0.553022	0.715621		ENSG00000046647	428.197	0.167413	0.0243907	6.86379	6.70553e-12	1.05527e-11		ENSG00000046647	428.197	0.167413	0.0243907	6.86379	6.70553e-12	1.05527e-11		ENSG00000046647	428.197	0.071551	0.120611	0.593238	0.553022	0.715621		ENSG00000046647	428.197	0.071551	0.120611	0.593238	0.553022	0.715621
ENSG00000046651	879.475	-0.347971	0.131266	-2.65089	0.00802799	0.02685		ENSG00000046651	879.475	-0.197987	0.0265037	-7.47017	8.00912e-14	1.28868e-13		ENSG00000046651	879.475	-0.197987	0.0265037	-7.47017	8.00912e-14	1.28868e-13		ENSG00000046651	879.475	-0.347971	0.131266	-2.65089	0.00802799	0.02685		ENSG00000046651	879.475	-0.347971	0.131266	-2.65089	0.00802799	0.02685
ENSG00000046653	22832.8	-0.106256	0.231341	-0.459305	0.646015	0.796775		ENSG00000046653	22832.8	0.222231	0.04677	4.75157	2.01841e-06	2.93049e-06		ENSG00000046653	22832.8	0.222231	0.04677	4.75157	2.01841e-06	2.93049e-06		ENSG00000046653	22832.8	-0.106256	0.231341	-0.459305	0.646015	0.796775		ENSG00000046653	22832.8	-0.106256	0.231341	-0.459305	0.646015	0.796775
ENSG00000046774	2.30595	0.976562	1.03689	0.94182	0.346285	0.512849		ENSG00000046774	2.30595	5.27286	0.213138	24.7391	4.05757e-135	1.2435e-134		ENSG00000046774	2.30595	5.27286	0.213138	24.7391	4.05757e-135	1.2435e-134		ENSG00000046774	2.30595	0.976562	1.03689	0.94182	0.346285	0.512849		ENSG00000046774	2.30595	0.976562	1.03689	0.94182	0.346285	0.512849
ENSG00000046889	1444.88	-1.28698	0.242956	-5.29719	1.18e-07	2.26e-06		ENSG00000046889	1444.88	0.300792	0.0490823	6.12832	8.88112e-10	1.36084e-09		ENSG00000046889	1444.88	0.300792	0.0490823	6.12832	8.88112e-10	1.36084e-09		ENSG00000046889	1444.88	-1.28698	0.242956	-5.29719	1.17601e-07	2.26185e-06		ENSG00000046889	1444.88	-1.28698	0.242956	-5.29719	1.17601e-07	2.26185e-06
ENSG00000047056	968.506	0.146281	0.127173	1.15025	0.250043	0.403039		ENSG00000047056	968.506	-0.558843	0.025711	-21.7355	9.46591e-105	2.57567e-104		ENSG00000047056	968.506	-0.558843	0.025711	-21.7355	9.46591e-105	2.57567e-104		ENSG00000047056	968.506	0.146281	0.127173	1.15025	0.250043	0.403039		ENSG00000047056	968.506	0.146281	0.127173	1.15025	0.250043	0.403039
ENSG00000047188	1129.58	-0.241771	0.164385	-1.47077	0.141354	0.261619		ENSG00000047188	1129.58	-0.0892051	0.03322	-2.68529	0.00724677	0.00965424		ENSG00000047188	1129.58	-0.0892051	0.03322	-2.68529	0.00724677	0.00965424		ENSG00000047188	1129.58	-0.241771	0.164385	-1.47077	0.141354	0.261619		ENSG00000047188	1129.58	-0.241771	0.164385	-1.47077	0.141354	0.261619
ENSG00000047230	509.394	-0.252381	0.133371	-1.89232	0.0584483	0.132498		ENSG00000047230	509.394	1.08054	0.0269622	40.0761	0	0		ENSG00000047230	509.394	1.08054	0.0269622	40.0761	0	0		ENSG00000047230	509.394	-0.252381	0.133371	-1.89232	0.0584483	0.132498		ENSG00000047230	509.394	-0.252381	0.133371	-1.89232	0.0584483	0.132498
ENSG00000047249	2672.29	0.19306	0.181288	1.06494	0.286904	0.446051		ENSG00000047249	2672.29	-0.823463	0.0366515	-22.4674	8.64978e-112	2.4206e-111		ENSG00000047249	2672.29	-0.823463	0.0366515	-22.4674	8.64978e-112	2.4206e-111		ENSG00000047249	2672.29	0.19306	0.181288	1.06494	0.286904	0.446051		ENSG00000047249	2672.29	0.19306	0.181288	1.06494	0.286904	0.446051
ENSG00000047315	2005.35	-0.323506	0.102161	-3.16665	0.00154208	0.00682302		ENSG00000047315	2005.35	0.751468	0.0206486	36.3932	5.44899e-290	2.72535e-289		ENSG00000047315	2005.35	0.751468	0.0206486	36.3932	5.44899e-290	2.72535e-289		ENSG00000047315	2005.35	-0.323506	0.102161	-3.16665	0.00154208	0.00682302		ENSG00000047315	2005.35	-0.323506	0.102161	-3.16665	0.00154208	0.00682302
ENSG00000047346	1042.02	-0.0659892	0.179605	-0.367413	0.713311	0.850072		ENSG00000047346	1042.02	-0.485233	0.0363005	-13.3671	9.41447e-41	1.87372e-40		ENSG00000047346	1042.02	-0.485233	0.0363005	-13.3671	9.41447e-41	1.87372e-40		ENSG00000047346	1042.02	-0.0659892	0.179605	-0.367413	0.713311	0.850072		ENSG00000047346	1042.02	-0.0659892	0.179605	-0.367413	0.713311	0.850072
ENSG00000047365	1736.75	-0.727871	0.246649	-2.95105	0.003167	0.0123876		ENSG00000047365	1736.75	0.597744	0.0498546	11.9897	4.02158e-33	7.61313e-33		ENSG00000047365	1736.75	0.597744	0.0498546	11.9897	4.02158e-33	7.61313e-33		ENSG00000047365	1736.75	-0.727871	0.246649	-2.95105	0.003167	0.0123876		ENSG00000047365	1736.75	-0.727871	0.246649	-2.95105	0.003167	0.0123876
ENSG00000047410	2285.36	-0.54471	0.11603	-4.69456	2.67e-06	3.23e-05		ENSG00000047410	2285.36	1.13384	0.0234522	48.347	0	0		ENSG00000047410	2285.36	1.13384	0.0234522	48.347	0	0		ENSG00000047410	2285.36	-0.54471	0.11603	-4.69456	2.67177e-06	3.23158e-05		ENSG00000047410	2285.36	-0.54471	0.11603	-4.69456	2.67177e-06	3.23158e-05
ENSG00000047457	1141.58	1.2334	0.4037	3.05524	0.00224882	0.00929383		ENSG00000047457	1141.58	1.11724	0.0816254	13.6874	1.20716e-42	2.42959e-42		ENSG00000047457	1141.58	1.11724	0.0816254	13.6874	1.20716e-42	2.42959e-42		ENSG00000047457	1141.58	1.2334	0.4037	3.05524	0.00224882	0.00929383		ENSG00000047457	1141.58	1.2334	0.4037	3.05524	0.00224882	0.00929383
ENSG00000047578	796.19	-0.571569	0.119698	-4.77508	1.8e-06	2.31e-05		ENSG00000047578	796.19	0.677967	0.024169	28.0511	3.86849e-173	1.35867e-172		ENSG00000047578	796.19	0.677967	0.024169	28.0511	3.86849e-173	1.35867e-172		ENSG00000047578	796.19	-0.571569	0.119698	-4.77508	1.79639e-06	2.30641e-05		ENSG00000047578	796.19	-0.571569	0.119698	-4.77508	1.79639e-06	2.30641e-05
ENSG00000047579	858.144	0.362616	0.213054	1.70199	0.0887564	0.183198		ENSG00000047579	858.144	-1.03291	0.0430837	-23.9744	5.14296e-127	1.52746e-126		ENSG00000047579	858.144	-1.03291	0.0430837	-23.9744	5.14296e-127	1.52746e-126		ENSG00000047579	858.144	0.362616	0.213054	1.70199	0.0887564	0.183198		ENSG00000047579	858.144	0.362616	0.213054	1.70199	0.0887564	0.183198
ENSG00000047597	227.65	0.545385	0.297872	1.83094	0.0671099	0.147614		ENSG00000047597	227.65	-1.64034	0.0602905	-27.2073	5.33061e-163	1.80836e-162		ENSG00000047597	227.65	-1.64034	0.0602905	-27.2073	5.33061e-163	1.80836e-162		ENSG00000047597	227.65	0.545385	0.297872	1.83094	0.0671099	0.147614		ENSG00000047597	227.65	0.545385	0.297872	1.83094	0.0671099	0.147614
ENSG00000047617	91.0961	-1.70843	0.269452	-6.34039	2.29e-10	1.02e-08		ENSG00000047617	91.0961	0.123946	0.0535536	2.31444	0.0206438	0.0270457		ENSG00000047617	91.0961	0.123946	0.0535536	2.31444	0.0206438	0.0270457		ENSG00000047617	91.0961	-1.70843	0.269452	-6.34039	2.29189e-10	1.01774e-08		ENSG00000047617	91.0961	-1.70843	0.269452	-6.34039	2.29189e-10	1.01774e-08
ENSG00000047621	513.761	-0.112295	0.117102	-0.958947	0.337585	0.503282		ENSG00000047621	513.761	0.831027	0.0236777	35.0975	7.36173e-270	3.48182e-269		ENSG00000047621	513.761	0.831027	0.0236777	35.0975	7.36173e-270	3.48182e-269		ENSG00000047621	513.761	-0.112295	0.117102	-0.958947	0.337585	0.503282		ENSG00000047621	513.761	-0.112295	0.117102	-0.958947	0.337585	0.503282
ENSG00000047634	392.34	0.124498	0.148241	0.839833	0.401002	0.570081		ENSG00000047634	392.34	-0.282783	0.0299732	-9.43455	3.92679e-21	6.79615e-21		ENSG00000047634	392.34	-0.282783	0.0299732	-9.43455	3.92679e-21	6.79615e-21		ENSG00000047634	392.34	0.124498	0.148241	0.839833	0.401002	0.570081		ENSG00000047634	392.34	0.124498	0.148241	0.839833	0.401002	0.570081
ENSG00000047644	1183.07	-0.0336122	0.144211	-0.233077	0.815702	0.924166		ENSG00000047644	1183.07	0.0350221	0.0291519	1.20136	0.22961	0.282907		ENSG00000047644	1183.07	0.0350221	0.0291519	1.20136	0.22961	0.282907		ENSG00000047644	1183.07	-0.0336122	0.144211	-0.233077	0.815702	0.924166		ENSG00000047644	1183.07	-0.0336122	0.144211	-0.233077	0.815702	0.924166
ENSG00000047648	258.139	-0.442872	0.304845	-1.45278	0.146286	0.268446		ENSG00000047648	258.139	0.410158	0.0615955	6.65889	2.75908e-11	4.31039e-11		ENSG00000047648	258.139	0.410158	0.0615955	6.65889	2.75908e-11	4.31039e-11		ENSG00000047648	258.139	-0.442872	0.304845	-1.45278	0.146286	0.268446		ENSG00000047648	258.139	-0.442872	0.304845	-1.45278	0.146286	0.268446
ENSG00000047662	780.51	-1.01226	0.137468	-7.36365	1.79e-13	2e-11		ENSG00000047662	780.51	-2.20104	0.0272941	-80.6415	0	0		ENSG00000047662	780.51	-2.20104	0.0272941	-80.6415	0	0		ENSG00000047662	780.51	-1.01226	0.137468	-7.36365	1.78955e-13	2.0008e-11		ENSG00000047662	780.51	-1.01226	0.137468	-7.36365	1.78955e-13	2.0008e-11
ENSG00000047849	25411.1	0.288282	0.25337	1.13779	0.255207	0.409125		ENSG00000047849	25411.1	-0.847672	0.0512239	-16.5484	1.64528e-61	3.68167e-61		ENSG00000047849	25411.1	-0.847672	0.0512239	-16.5484	1.64528e-61	3.68167e-61		ENSG00000047849	25411.1	0.288282	0.25337	1.13779	0.255207	0.409125		ENSG00000047849	25411.1	0.288282	0.25337	1.13779	0.255207	0.409125
ENSG00000047932	1176.49	0.244109	0.103961	2.34808	0.0188703	0.053789		ENSG00000047932	1176.49	-0.414871	0.0210263	-19.7311	1.16701e-86	2.94408e-86		ENSG00000047932	1176.49	-0.414871	0.0210263	-19.7311	1.16701e-86	2.94408e-86		ENSG00000047932	1176.49	0.244109	0.103961	2.34808	0.0188703	0.053789		ENSG00000047932	1176.49	0.244109	0.103961	2.34808	0.0188703	0.053789
ENSG00000047936	23.9089	2.57205	0.948791	2.71087	0.0067106	0.0231523		ENSG00000047936	23.9089	0.380552	0.192145	1.98055	0.0476422	0.0613732		ENSG00000047936	23.9089	0.380552	0.192145	1.98055	0.0476422	0.0613732		ENSG00000047936	23.9089	2.57205	0.948791	2.71087	0.0067106	0.0231523		ENSG00000047936	23.9089	2.57205	0.948791	2.71087	0.0067106	0.0231523
ENSG00000048028	681.158	-0.236848	0.244689	-0.967957	0.333066	0.498227		ENSG00000048028	681.158	0.248275	0.049459	5.01981	5.17236e-07	7.59315e-07		ENSG00000048028	681.158	0.248275	0.049459	5.01981	5.17236e-07	7.59315e-07		ENSG00000048028	681.158	-0.236848	0.244689	-0.967957	0.333066	0.498227		ENSG00000048028	681.158	-0.236848	0.244689	-0.967957	0.333066	0.498227
ENSG00000048052	639.936	-0.452707	0.197782	-2.28892	0.0220837	0.0609263		ENSG00000048052	639.936	1.24383	0.0399795	31.1118	1.66707e-212	6.66609e-212		ENSG00000048052	639.936	1.24383	0.0399795	31.1118	1.66707e-212	6.66609e-212		ENSG00000048052	639.936	-0.452707	0.197782	-2.28892	0.0220837	0.0609263		ENSG00000048052	639.936	-0.452707	0.197782	-2.28892	0.0220837	0.0609263
ENSG00000048140	990.147	0.145752	0.15587	0.935091	0.349741	0.516606		ENSG00000048140	990.147	0.412378	0.0315189	13.0835	4.0912e-39	8.05514e-39		ENSG00000048140	990.147	0.412378	0.0315189	13.0835	4.0912e-39	8.05514e-39		ENSG00000048140	990.147	0.145752	0.15587	0.935091	0.349741	0.516606		ENSG00000048140	990.147	0.145752	0.15587	0.935091	0.349741	0.516606
ENSG00000048162	627.391	-0.018516	0.0922107	-0.200801	0.840854	0.940904		ENSG00000048162	627.391	-0.954214	0.0185953	-51.3149	0	0		ENSG00000048162	627.391	-0.954214	0.0185953	-51.3149	0	0		ENSG00000048162	627.391	-0.018516	0.0922107	-0.200801	0.840854	0.940904		ENSG00000048162	627.391	-0.018516	0.0922107	-0.200801	0.840854	0.940904
ENSG00000048342	508.096	-0.710221	0.146286	-4.85501	1.2e-06	1.63e-05		ENSG00000048342	508.096	1.63245	0.0295586	55.2277	0	0		ENSG00000048342	508.096	1.63245	0.0295586	55.2277	0	0		ENSG00000048342	508.096	-0.710221	0.146286	-4.85501	1.2038e-06	1.63115e-05		ENSG00000048342	508.096	-0.710221	0.146286	-4.85501	1.2038e-06	1.63115e-05
ENSG00000048392	923.827	0.258997	0.142653	1.81557	0.069436	0.151745		ENSG00000048392	923.827	0.995549	0.0288545	34.5023	7.39939e-261	3.42073e-260		ENSG00000048392	923.827	0.995549	0.0288545	34.5023	7.39939e-261	3.42073e-260		ENSG00000048392	923.827	0.258997	0.142653	1.81557	0.069436	0.151745		ENSG00000048392	923.827	0.258997	0.142653	1.81557	0.069436	0.151745
ENSG00000048405	314.088	-0.147548	0.124455	-1.18555	0.235799	0.386052		ENSG00000048405	314.088	1.53075	0.0251849	60.7805	0	0		ENSG00000048405	314.088	1.53075	0.0251849	60.7805	0	0		ENSG00000048405	314.088	-0.147548	0.124455	-1.18555	0.235799	0.386052		ENSG00000048405	314.088	-0.147548	0.124455	-1.18555	0.235799	0.386052
ENSG00000048462	3.10117	0.741796	0.463175	1.60155	0.109256	0.215061		ENSG00000048462	3.10117	1.23554	0.0958145	12.8951	4.79675e-38	9.38221e-38		ENSG00000048462	3.10117	1.23554	0.0958145	12.8951	4.79675e-38	9.38221e-38		ENSG00000048462	3.10117	0.741796	0.463175	1.60155	0.109256	0.215061		ENSG00000048462	3.10117	0.741796	0.463175	1.60155	0.109256	0.215061
ENSG00000048471	957.822	-0.152757	0.141487	-1.07965	0.280296	0.438502		ENSG00000048471	957.822	0.648982	0.0286023	22.6899	5.64054e-114	1.59708e-113		ENSG00000048471	957.822	0.648982	0.0286023	22.6899	5.64054e-114	1.59708e-113		ENSG00000048471	957.822	-0.152757	0.141487	-1.07965	0.280296	0.438502		ENSG00000048471	957.822	-0.152757	0.141487	-1.07965	0.280296	0.438502
ENSG00000048540	3913.99	-0.188889	0.364476	-0.518249	0.604284	0.760883		ENSG00000048540	3913.99	-1.35844	0.073681	-18.4368	6.65457e-76	1.59897e-75		ENSG00000048540	3913.99	-1.35844	0.073681	-18.4368	6.65457e-76	1.59897e-75		ENSG00000048540	3913.99	-0.188889	0.364476	-0.518249	0.604284	0.760883		ENSG00000048540	3913.99	-0.188889	0.364476	-0.518249	0.604284	0.760883
ENSG00000048544	714.615	0.321499	0.102286	3.14314	0.00167144	0.00728419		ENSG00000048544	714.615	0.659647	0.020706	31.8577	1.02936e-222	4.24132e-222		ENSG00000048544	714.615	0.659647	0.020706	31.8577	1.02936e-222	4.24132e-222		ENSG00000048544	714.615	0.321499	0.102286	3.14314	0.00167144	0.00728419		ENSG00000048544	714.615	0.321499	0.102286	3.14314	0.00167144	0.00728419
ENSG00000048545	113.841	-0.203761	0.611796	-0.333054	0.739093	0.86881		ENSG00000048545	113.841	-6.80756	0.117741	-57.8182	0	0		ENSG00000048545	113.841	-6.80756	0.117741	-57.8182	0	0		ENSG00000048545	113.841	-0.203761	0.611796	-0.333054	0.739093	0.86881		ENSG00000048545	113.841	-0.203761	0.611796	-0.333054	0.739093	0.86881
ENSG00000048649	1479.37	-0.331447	0.0985267	-3.36403	0.00076812	0.00381041		ENSG00000048649	1479.37	0.529838	0.019908	26.6143	4.63523e-156	1.53199e-155		ENSG00000048649	1479.37	0.529838	0.019908	26.6143	4.63523e-156	1.53199e-155		ENSG00000048649	1479.37	-0.331447	0.0985267	-3.36403	0.000768119	0.00381041		ENSG00000048649	1479.37	-0.331447	0.0985267	-3.36403	0.000768119	0.00381041
ENSG00000048707	2906.8	-0.93283	0.129372	-7.21042	5.58e-13	5.45e-11		ENSG00000048707	2906.8	0.790827	0.0261409	30.2524	4.84891e-201	1.86864e-200		ENSG00000048707	2906.8	0.790827	0.0261409	30.2524	4.84891e-201	1.86864e-200		ENSG00000048707	2906.8	-0.93283	0.129372	-7.21042	5.57789e-13	5.44815e-11		ENSG00000048707	2906.8	-0.93283	0.129372	-7.21042	5.57789e-13	5.44815e-11
ENSG00000048740	3514.84	0.155611	0.177942	0.874505	0.381844	0.550214		ENSG00000048740	3514.84	-0.473432	0.0359749	-13.1601	1.48964e-39	2.9407e-39		ENSG00000048740	3514.84	-0.473432	0.0359749	-13.1601	1.48964e-39	2.9407e-39		ENSG00000048740	3514.84	0.155611	0.177942	0.874505	0.381844	0.550214		ENSG00000048740	3514.84	0.155611	0.177942	0.874505	0.381844	0.550214
ENSG00000048828	2536.4	0.185567	0.0665148	2.78987	0.00527298	0.0189215		ENSG00000048828	2536.4	0.660992	0.0134556	49.1239	0	0		ENSG00000048828	2536.4	0.660992	0.0134556	49.1239	0	0		ENSG00000048828	2536.4	0.185567	0.0665148	2.78987	0.00527298	0.0189215		ENSG00000048828	2536.4	0.185567	0.0665148	2.78987	0.00527298	0.0189215
ENSG00000048991	2134.64	0.285089	0.247347	1.15259	0.249079	0.402103		ENSG00000048991	2134.64	-1.09686	0.0500081	-21.9337	1.23984e-106	3.40003e-106		ENSG00000048991	2134.64	-1.09686	0.0500081	-21.9337	1.23984e-106	3.40003e-106		ENSG00000048991	2134.64	0.285089	0.247347	1.15259	0.249079	0.402103		ENSG00000048991	2134.64	0.285089	0.247347	1.15259	0.249079	0.402103
ENSG00000049089	2733.85	-0.44649	0.333879	-1.33728	0.181131	0.316157		ENSG00000049089	2733.85	-1.23682	0.0674875	-18.3267	5.07161e-75	1.21324e-74		ENSG00000049089	2733.85	-1.23682	0.0674875	-18.3267	5.07161e-75	1.21324e-74		ENSG00000049089	2733.85	-0.44649	0.333879	-1.33728	0.181131	0.316157		ENSG00000049089	2733.85	-0.44649	0.333879	-1.33728	0.181131	0.316157
ENSG00000049130	420.789	-0.103073	0.262033	-0.393359	0.694054	0.835395		ENSG00000049130	420.789	1.39538	0.0529837	26.3361	7.41271e-153	2.42402e-152		ENSG00000049130	420.789	1.39538	0.0529837	26.3361	7.41271e-153	2.42402e-152		ENSG00000049130	420.789	-0.103073	0.262033	-0.393359	0.694054	0.835395		ENSG00000049130	420.789	-0.103073	0.262033	-0.393359	0.694054	0.835395
ENSG00000049167	209.986	-0.311457	0.0966316	-3.22314	0.00126793	0.00579514		ENSG00000049167	209.986	1.55957	0.0195533	79.7599	0	0		ENSG00000049167	209.986	1.55957	0.0195533	79.7599	0	0		ENSG00000049167	209.986	-0.311457	0.0966316	-3.22314	0.00126793	0.00579514		ENSG00000049167	209.986	-0.311457	0.0966316	-3.22314	0.00126793	0.00579514
ENSG00000049192	83.4641	-0.93284	0.30603	-3.04819	0.00230221	0.00946826		ENSG00000049192	83.4641	3.15723	0.0619164	50.9917	0	0		ENSG00000049192	83.4641	3.15723	0.0619164	50.9917	0	0		ENSG00000049192	83.4641	-0.93284	0.30603	-3.04819	0.00230221	0.00946826		ENSG00000049192	83.4641	-0.93284	0.30603	-3.04819	0.00230221	0.00946826
ENSG00000049239	1283.5	0.0925064	0.136878	0.675832	0.499148	0.666159		ENSG00000049239	1283.5	1.40597	0.0276818	50.7906	0	0		ENSG00000049239	1283.5	1.40597	0.0276818	50.7906	0	0		ENSG00000049239	1283.5	0.0925064	0.136878	0.675832	0.499148	0.666159		ENSG00000049239	1283.5	0.0925064	0.136878	0.675832	0.499148	0.666159
ENSG00000049245	2619.26	0.408711	0.232043	1.76136	0.078178	0.166079		ENSG00000049245	2619.26	0.281871	0.046916	6.00799	1.87833e-09	2.86467e-09		ENSG00000049245	2619.26	0.281871	0.046916	6.00799	1.87833e-09	2.86467e-09		ENSG00000049245	2619.26	0.408711	0.232043	1.76136	0.078178	0.166079		ENSG00000049245	2619.26	0.408711	0.232043	1.76136	0.078178	0.166079
ENSG00000049246	1972.93	-0.0776207	0.232993	-0.333145	0.739025	0.868753		ENSG00000049246	1972.93	-2.19059	0.0470819	-46.5272	0	0		ENSG00000049246	1972.93	-2.19059	0.0470819	-46.5272	0	0		ENSG00000049246	1972.93	-0.0776207	0.232993	-0.333145	0.739025	0.868753		ENSG00000049246	1972.93	-0.0776207	0.232993	-0.333145	0.739025	0.868753
ENSG00000049247	306.636	1.85932	0.321943	5.77531	7.68e-09	2.13e-07		ENSG00000049247	306.636	-6.22814	0.0684352	-91.0078	0	0		ENSG00000049247	306.636	-6.22814	0.0684352	-91.0078	0	0		ENSG00000049247	306.636	1.85932	0.321943	5.77531	7.68136e-09	2.1308e-07		ENSG00000049247	306.636	1.85932	0.321943	5.77531	7.68136e-09	2.1308e-07
ENSG00000049249	5.48601	1.36324	0.620064	2.19855	0.0279101	0.0736781		ENSG00000049249	5.48601	3.48805	0.12688	27.491	2.25189e-166	7.73252e-166		ENSG00000049249	5.48601	3.48805	0.12688	27.491	2.25189e-166	7.73252e-166		ENSG00000049249	5.48601	1.36324	0.620064	2.19855	0.0279101	0.0736781		ENSG00000049249	5.48601	1.36324	0.620064	2.19855	0.0279101	0.0736781
ENSG00000049283	68.8466	-0.126135	0.396159	-0.318396	0.750185	0.876402		ENSG00000049283	68.8466	-1.50851	0.079838	-18.8947	1.26154e-79	3.08365e-79		ENSG00000049283	68.8466	-1.50851	0.079838	-18.8947	1.26154e-79	3.08365e-79		ENSG00000049283	68.8466	-0.126135	0.396159	-0.318396	0.750185	0.876402		ENSG00000049283	68.8466	-0.126135	0.396159	-0.318396	0.750185	0.876402
ENSG00000049323	630.563	0.436053	0.318747	1.36802	0.171305	0.302888		ENSG00000049323	630.563	2.44068	0.0644566	37.8654	0	0		ENSG00000049323	630.563	2.44068	0.0644566	37.8654	0	0		ENSG00000049323	630.563	0.436053	0.318747	1.36802	0.171305	0.302888		ENSG00000049323	630.563	0.436053	0.318747	1.36802	0.171305	0.302888
ENSG00000049449	1266.62	0.657481	0.177144	3.71157	0.00020598	0.00126355		ENSG00000049449	1266.62	-0.318495	0.0358303	-8.88899	6.16691e-19	1.04628e-18		ENSG00000049449	1266.62	-0.318495	0.0358303	-8.88899	6.16691e-19	1.04628e-18		ENSG00000049449	1266.62	0.657481	0.177144	3.71157	0.000205979	0.00126355		ENSG00000049449	1266.62	0.657481	0.177144	3.71157	0.000205979	0.00126355
ENSG00000049540	1560.5	-0.0227859	0.336897	-0.0676345	0.946077	1		ENSG00000049540	1560.5	1.89458	0.0681138	27.8149	2.86668e-170	9.96758e-170		ENSG00000049540	1560.5	1.89458	0.0681138	27.8149	2.86668e-170	9.96758e-170		ENSG00000049540	1560.5	-0.0227859	0.336897	-0.0676345	0.946077	1		ENSG00000049540	1560.5	-0.0227859	0.336897	-0.0676345	0.946077	1
ENSG00000049541	503.803	-0.232536	0.0911299	-2.5517	0.0107199	0.0340339		ENSG00000049541	503.803	2.16723	0.0184552	117.432	0	0		ENSG00000049541	503.803	2.16723	0.0184552	117.432	0	0		ENSG00000049541	503.803	-0.232536	0.0911299	-2.5517	0.0107199	0.0340339		ENSG00000049541	503.803	-0.232536	0.0911299	-2.5517	0.0107199	0.0340339
ENSG00000049618	1872.25	-0.284419	0.134461	-2.11525	0.0344084	0.0869856		ENSG00000049618	1872.25	0.461006	0.0271781	16.9624	1.55879e-64	3.5445e-64		ENSG00000049618	1872.25	0.461006	0.0271781	16.9624	1.55879e-64	3.5445e-64		ENSG00000049618	1872.25	-0.284418	0.134461	-2.11525	0.0344084	0.0869856		ENSG00000049618	1872.25	-0.284418	0.134461	-2.11525	0.0344084	0.0869856
ENSG00000049656	1399.47	0.155021	0.0851438	1.82069	0.0686536	0.150326		ENSG00000049656	1399.47	0.8642	0.0172254	50.1701	0	0		ENSG00000049656	1399.47	0.8642	0.0172254	50.1701	0	0		ENSG00000049656	1399.47	0.155021	0.0851438	1.82069	0.0686536	0.150326		ENSG00000049656	1399.47	0.155021	0.0851438	1.82069	0.0686536	0.150326
ENSG00000049759	2394.76	0.279016	0.218381	1.27766	0.201369	0.342928		ENSG00000049759	2394.76	-0.822678	0.0441522	-18.6328	1.74215e-77	4.21483e-77		ENSG00000049759	2394.76	-0.822678	0.0441522	-18.6328	1.74215e-77	4.21483e-77		ENSG00000049759	2394.76	0.279016	0.218381	1.27766	0.201369	0.342928		ENSG00000049759	2394.76	0.279016	0.218381	1.27766	0.201369	0.342928
ENSG00000049768	35.9824	1.21161	0.161506	7.50195	6.29e-14	7.91e-12		ENSG00000049768	35.9824	-1.13688	0.0341502	-33.2907	5.26115e-243	2.30491e-242		ENSG00000049768	35.9824	-1.13688	0.0341502	-33.2907	5.26115e-243	2.30491e-242		ENSG00000049768	35.9824	1.21161	0.161506	7.50195	6.28764e-14	7.91362e-12		ENSG00000049768	35.9824	1.21161	0.161506	7.50195	6.28764e-14	7.91362e-12
ENSG00000049769	1437.51	0.0901107	0.142489	0.632402	0.527124	0.692462		ENSG00000049769	1437.51	-2.29925	0.0287788	-79.8937	0	0		ENSG00000049769	1437.51	-2.29925	0.0287788	-79.8937	0	0		ENSG00000049769	1437.51	0.0901107	0.142489	0.632402	0.527124	0.692462		ENSG00000049769	1437.51	0.0901107	0.142489	0.632402	0.527124	0.692462
ENSG00000049860	1129.3	0.699775	0.11877	5.89184	3.82e-09	1.15e-07		ENSG00000049860	1129.3	1.32981	0.0240353	55.3274	0	0		ENSG00000049860	1129.3	1.32981	0.0240353	55.3274	0	0		ENSG00000049860	1129.3	0.699775	0.11877	5.89184	3.81908e-09	1.15214e-07		ENSG00000049860	1129.3	0.699775	0.11877	5.89184	3.81908e-09	1.15214e-07
ENSG00000049883	388.693	-0.0714409	0.084326	-0.847199	0.396884	0.565871		ENSG00000049883	388.693	0.320043	0.0170369	18.7853	9.95919e-79	2.42355e-78		ENSG00000049883	388.693	0.320043	0.0170369	18.7853	9.95919e-79	2.42355e-78		ENSG00000049883	388.693	-0.0714409	0.084326	-0.847199	0.396884	0.565871		ENSG00000049883	388.693	-0.0714409	0.084326	-0.847199	0.396884	0.565871
ENSG00000050030	335.632	-0.773337	0.294028	-2.63015	0.0085347	0.0282415		ENSG00000050030	335.632	0.326503	0.0593819	5.49835	3.83354e-08	5.73104e-08		ENSG00000050030	335.632	0.326503	0.0593819	5.49835	3.83354e-08	5.73104e-08		ENSG00000050030	335.632	-0.773337	0.294028	-2.63015	0.0085347	0.0282415		ENSG00000050030	335.632	-0.773337	0.294028	-2.63015	0.0085347	0.0282415
ENSG00000050130	1009.2	0.260001	0.106045	2.45181	0.014214	0.0428482		ENSG00000050130	1009.2	0.123251	0.0214527	5.74526	9.17796e-09	1.38641e-08		ENSG00000050130	1009.2	0.123251	0.0214527	5.74526	9.17796e-09	1.38641e-08		ENSG00000050130	1009.2	0.260001	0.106045	2.45181	0.014214	0.0428482		ENSG00000050130	1009.2	0.260001	0.106045	2.45181	0.014214	0.0428482
ENSG00000050165	14272.3	0.46381	0.20025	2.31615	0.0205501	0.0574872		ENSG00000050165	14272.3	-0.960587	0.0404857	-23.7266	1.91768e-124	5.64005e-124		ENSG00000050165	14272.3	-0.960587	0.0404857	-23.7266	1.91768e-124	5.64005e-124		ENSG00000050165	14272.3	0.46381	0.20025	2.31615	0.0205501	0.0574872		ENSG00000050165	14272.3	0.46381	0.20025	2.31615	0.0205501	0.0574872
ENSG00000050327	79.1148	1.12695	0.359442	3.13527	0.00171694	0.00745594		ENSG00000050327	79.1148	-1.80411	0.0731143	-24.6752	1.97696e-134	6.04125e-134		ENSG00000050327	79.1148	-1.80411	0.0731143	-24.6752	1.97696e-134	6.04125e-134		ENSG00000050327	79.1148	1.12695	0.359442	3.13527	0.00171694	0.00745594		ENSG00000050327	79.1148	1.12695	0.359442	3.13527	0.00171694	0.00745594
ENSG00000050344	257.819	0.453433	0.283957	1.59684	0.110302	0.216606		ENSG00000050344	257.819	0.0886798	0.0574418	1.54382	0.122632	0.154289		ENSG00000050344	257.819	0.0886798	0.0574418	1.54382	0.122632	0.154289		ENSG00000050344	257.819	0.453433	0.283957	1.59684	0.110302	0.216606		ENSG00000050344	257.819	0.453433	0.283957	1.59684	0.110302	0.216606
ENSG00000050393	1135.63	0.184475	0.128807	1.43218	0.152093	0.276317		ENSG00000050393	1135.63	0.088477	0.0260478	3.39671	0.000682012	0.000936934		ENSG00000050393	1135.63	0.088477	0.0260478	3.39671	0.000682012	0.000936934		ENSG00000050393	1135.63	0.184475	0.128807	1.43218	0.152093	0.276317		ENSG00000050393	1135.63	0.184475	0.128807	1.43218	0.152093	0.276317
ENSG00000050405	2037.8	-0.0344823	0.341648	-0.100929	0.919607	0.992153		ENSG00000050405	2037.8	1.11219	0.0690723	16.1018	2.47971e-58	5.45931e-58		ENSG00000050405	2037.8	1.11219	0.0690723	16.1018	2.47971e-58	5.45931e-58		ENSG00000050405	2037.8	-0.0344823	0.341648	-0.100929	0.919607	0.992153		ENSG00000050405	2037.8	-0.0344823	0.341648	-0.100929	0.919607	0.992153
ENSG00000050426	1592.54	-0.0024786	0.0835091	-0.0296802	0.976322	1		ENSG00000050426	1592.54	-0.635653	0.0168709	-37.6775	0	0		ENSG00000050426	1592.54	-0.635653	0.0168709	-37.6775	0	0		ENSG00000050426	1592.54	-0.00247857	0.0835091	-0.0296802	0.976322	1		ENSG00000050426	1592.54	-0.00247857	0.0835091	-0.0296802	0.976322	1
ENSG00000050438	1977.49	-0.52464	0.186616	-2.81134	0.0049336	0.0178963		ENSG00000050438	1977.49	0.0192646	0.0377148	0.510796	0.609494	0.701485		ENSG00000050438	1977.49	0.0192646	0.0377148	0.510796	0.609494	0.701485		ENSG00000050438	1977.49	-0.52464	0.186616	-2.81134	0.0049336	0.0178963		ENSG00000050438	1977.49	-0.52464	0.186616	-2.81134	0.0049336	0.0178963
ENSG00000050555	306.35	-0.358007	0.270516	-1.32342	0.185695	0.32224		ENSG00000050555	306.35	1.70947	0.0546956	31.2543	1.95211e-214	7.84628e-214		ENSG00000050555	306.35	1.70947	0.0546956	31.2543	1.95211e-214	7.84628e-214		ENSG00000050555	306.35	-0.358007	0.270516	-1.32342	0.185695	0.32224		ENSG00000050555	306.35	-0.358007	0.270516	-1.32342	0.185695	0.32224
ENSG00000050628	85.9352	0.629966	0.602187	1.04613	0.295501	0.456052		ENSG00000050628	85.9352	-2.61033	0.12193	-21.4083	1.11779e-101	3.00084e-101		ENSG00000050628	85.9352	-2.61033	0.12193	-21.4083	1.11779e-101	3.00084e-101		ENSG00000050628	85.9352	0.629966	0.602187	1.04613	0.295501	0.456052		ENSG00000050628	85.9352	0.629966	0.602187	1.04613	0.295501	0.456052
ENSG00000050730	4.02725	2.25461	0.537292	4.19625	2.71e-05	0.00022764		ENSG00000050730	4.02725	0.0784818	0.112153	0.699771	0.48407	0.572121		ENSG00000050730	4.02725	0.0784818	0.112153	0.699771	0.48407	0.572121		ENSG00000050730	4.02725	2.25461	0.537292	4.19625	2.71372e-05	0.000227644		ENSG00000050730	4.02725	2.25461	0.537292	4.19625	2.71372e-05	0.000227644
ENSG00000050748	3215.27	0.409197	0.170087	2.4058	0.0161369	0.0474056		ENSG00000050748	3215.27	-1.51598	0.0343914	-44.0803	0	0		ENSG00000050748	3215.27	-1.51598	0.0343914	-44.0803	0	0		ENSG00000050748	3215.27	0.409197	0.170087	2.4058	0.0161369	0.0474056		ENSG00000050748	3215.27	0.409197	0.170087	2.4058	0.0161369	0.0474056
ENSG00000050767	197.083	-0.417106	0.341491	-1.22143	0.221924	0.368938		ENSG00000050767	197.083	0.580455	0.0690083	8.41138	4.05212e-17	6.75566e-17		ENSG00000050767	197.083	0.580455	0.0690083	8.41138	4.05212e-17	6.75566e-17		ENSG00000050767	197.083	-0.417106	0.341491	-1.22143	0.221924	0.368938		ENSG00000050767	197.083	-0.417106	0.341491	-1.22143	0.221924	0.368938
ENSG00000050820	2335.12	0.0900598	0.161718	0.556894	0.5776	0.737161		ENSG00000050820	2335.12	-0.243151	0.0326945	-7.43704	1.02963e-13	1.65414e-13		ENSG00000050820	2335.12	-0.243151	0.0326945	-7.43704	1.02963e-13	1.65414e-13		ENSG00000050820	2335.12	0.0900598	0.161718	0.556894	0.5776	0.737161		ENSG00000050820	2335.12	0.0900598	0.161718	0.556894	0.5776	0.737161
ENSG00000051009	876.787	-0.0759779	0.120398	-0.631055	0.528004	0.693026		ENSG00000051009	876.787	-0.0245132	0.0243316	-1.00746	0.313711	0.381301		ENSG00000051009	876.787	-0.0245132	0.0243316	-1.00746	0.313711	0.381301		ENSG00000051009	876.787	-0.0759779	0.120398	-0.631055	0.528004	0.693026		ENSG00000051009	876.787	-0.0759779	0.120398	-0.631055	0.528004	0.693026
ENSG00000051108	2080.25	0.179564	0.149944	1.19754	0.231096	0.380191		ENSG00000051108	2080.25	0.549833	0.0303184	18.1353	1.67773e-73	3.98641e-73		ENSG00000051108	2080.25	0.549833	0.0303184	18.1353	1.67773e-73	3.98641e-73		ENSG00000051108	2080.25	0.179564	0.149944	1.19754	0.231096	0.380191		ENSG00000051108	2080.25	0.179564	0.149944	1.19754	0.231096	0.380191
ENSG00000051128	1253.47	0.229996	0.251165	0.915717	0.359815	0.527404		ENSG00000051128	1253.47	-1.26337	0.0507786	-24.88	1.22447e-136	3.77372e-136		ENSG00000051128	1253.47	-1.26337	0.0507786	-24.88	1.22447e-136	3.77372e-136		ENSG00000051128	1253.47	0.229996	0.251165	0.915717	0.359815	0.527404		ENSG00000051128	1253.47	0.229996	0.251165	0.915717	0.359815	0.527404
ENSG00000051180	33.8873	0.0739557	0.182773	0.404631	0.685749	0.829295		ENSG00000051180	33.8873	3.67291	0.037621	97.629	0	0		ENSG00000051180	33.8873	3.67291	0.037621	97.629	0	0		ENSG00000051180	33.8873	0.0739557	0.182773	0.404631	0.685749	0.829295		ENSG00000051180	33.8873	0.0739557	0.182773	0.404631	0.685749	0.829295
ENSG00000051341	44.983	-0.911644	0.305764	-2.98153	0.00286815	0.0113978		ENSG00000051341	44.983	3.97538	0.0620506	64.0667	0	0		ENSG00000051341	44.983	3.97538	0.0620506	64.0667	0	0		ENSG00000051341	44.983	-0.911644	0.305764	-2.98153	0.00286815	0.0113978		ENSG00000051341	44.983	-0.911644	0.305764	-2.98153	0.00286815	0.0113978
ENSG00000051382	1165.69	0.217765	0.133029	1.63698	0.101635	0.203245		ENSG00000051382	1165.69	-0.360742	0.0269001	-13.4104	5.25412e-41	1.04734e-40		ENSG00000051382	1165.69	-0.360742	0.0269001	-13.4104	5.25412e-41	1.04734e-40		ENSG00000051382	1165.69	0.217765	0.133029	1.63698	0.101635	0.203245		ENSG00000051382	1165.69	0.217765	0.133029	1.63698	0.101635	0.203245
ENSG00000051523	760.515	0.254045	0.325999	0.779281	0.435814	0.604854		ENSG00000051523	760.515	2.09087	0.0659176	31.7195	8.36734e-221	3.42991e-220		ENSG00000051523	760.515	2.09087	0.0659176	31.7195	8.36734e-221	3.42991e-220		ENSG00000051523	760.515	0.254045	0.325999	0.779281	0.435814	0.604854		ENSG00000051523	760.515	0.254045	0.325999	0.779281	0.435814	0.604854
ENSG00000051596	452.578	0.0585518	0.223331	0.262175	0.793186	0.907987		ENSG00000051596	452.578	-0.91278	0.0451357	-20.223	6.14071e-91	1.57638e-90		ENSG00000051596	452.578	-0.91278	0.0451357	-20.223	6.14071e-91	1.57638e-90		ENSG00000051596	452.578	0.0585518	0.223331	0.262175	0.793186	0.907987		ENSG00000051596	452.578	0.0585518	0.223331	0.262175	0.793186	0.907987
ENSG00000051620	771.644	0.297	0.175464	1.69265	0.0905214	0.18603		ENSG00000051620	771.644	0.303155	0.0354864	8.54285	1.30952e-17	2.19341e-17		ENSG00000051620	771.644	0.303155	0.0354864	8.54285	1.30952e-17	2.19341e-17		ENSG00000051620	771.644	0.297	0.175464	1.69265	0.0905214	0.18603		ENSG00000051620	771.644	0.297	0.175464	1.69265	0.0905214	0.18603
ENSG00000051825	535.452	-0.907311	0.186899	-4.85454	1.21e-06	1.63e-05		ENSG00000051825	535.452	0.974673	0.0377417	25.8248	4.66451e-147	1.49386e-146		ENSG00000051825	535.452	0.974673	0.0377417	25.8248	4.66451e-147	1.49386e-146		ENSG00000051825	535.452	-0.907311	0.186899	-4.85454	1.20665e-06	1.6335e-05		ENSG00000051825	535.452	-0.907311	0.186899	-4.85454	1.20665e-06	1.6335e-05
ENSG00000052126	863.987	-0.575765	0.186521	-3.08687	0.00202276	0.0085341		ENSG00000052126	863.987	0.0866758	0.0376768	2.30051	0.0214194	0.0280433		ENSG00000052126	863.987	0.0866758	0.0376768	2.30051	0.0214194	0.0280433		ENSG00000052126	863.987	-0.575765	0.186521	-3.08687	0.00202276	0.0085341		ENSG00000052126	863.987	-0.575765	0.186521	-3.08687	0.00202276	0.0085341
ENSG00000052344	20.9225	-1.99464	0.479312	-4.16146	3.16e-05	0.00025843		ENSG00000052344	20.9225	-1.09444	0.090168	-12.1378	6.65727e-34	1.26628e-33		ENSG00000052344	20.9225	-1.09444	0.090168	-12.1378	6.65727e-34	1.26628e-33		ENSG00000052344	20.9225	-1.99464	0.479312	-4.16146	3.16214e-05	0.000258433		ENSG00000052344	20.9225	-1.99464	0.479312	-4.16146	3.16214e-05	0.000258433
ENSG00000052723	720.503	-0.106455	0.102567	-1.03791	0.299313	0.460404		ENSG00000052723	720.503	1.05333	0.0207429	50.7804	0	0		ENSG00000052723	720.503	1.05333	0.0207429	50.7804	0	0		ENSG00000052723	720.503	-0.106455	0.102567	-1.03791	0.299313	0.460404		ENSG00000052723	720.503	-0.106455	0.102567	-1.03791	0.299313	0.460404
ENSG00000052749	807.909	-0.0812657	0.158531	-0.512617	0.608219	0.764042		ENSG00000052749	807.909	0.019714	0.0320429	0.615236	0.538399	0.629734		ENSG00000052749	807.909	0.019714	0.0320429	0.615236	0.538399	0.629734		ENSG00000052749	807.909	-0.0812657	0.158531	-0.512617	0.608219	0.764042		ENSG00000052749	807.909	-0.0812657	0.158531	-0.512617	0.608219	0.764042
ENSG00000052795	1028.6	-0.275519	0.140751	-1.95749	0.0502897	0.117823		ENSG00000052795	1028.6	0.60808	0.0284482	21.375	2.28238e-101	6.11955e-101		ENSG00000052795	1028.6	0.60808	0.0284482	21.375	2.28238e-101	6.11955e-101		ENSG00000052795	1028.6	-0.275519	0.140751	-1.95749	0.0502897	0.117823		ENSG00000052795	1028.6	-0.275519	0.140751	-1.95749	0.0502897	0.117823
ENSG00000052802	1774.06	0.103119	0.233552	0.441524	0.658834	0.807543		ENSG00000052802	1774.06	-0.198336	0.0472176	-4.20046	2.66372e-05	3.78179e-05		ENSG00000052802	1774.06	-0.198336	0.0472176	-4.20046	2.66372e-05	3.78179e-05		ENSG00000052802	1774.06	0.103119	0.233552	0.441524	0.658834	0.807543		ENSG00000052802	1774.06	0.103119	0.233552	0.441524	0.658834	0.807543
ENSG00000052841	1535.95	-0.195349	0.133071	-1.468	0.142104	0.262564		ENSG00000052841	1535.95	0.464207	0.0268988	17.2575	9.82145e-67	2.25615e-66		ENSG00000052841	1535.95	0.464207	0.0268988	17.2575	9.82145e-67	2.25615e-66		ENSG00000052841	1535.95	-0.195349	0.133071	-1.468	0.142104	0.262564		ENSG00000052841	1535.95	-0.195349	0.133071	-1.468	0.142104	0.262564
ENSG00000052850	24.5704	0.225944	0.447835	0.504525	0.613893	0.769217		ENSG00000052850	24.5704	1.69824	0.0907367	18.7161	3.65835e-78	8.88106e-78		ENSG00000052850	24.5704	1.69824	0.0907367	18.7161	3.65835e-78	8.88106e-78		ENSG00000052850	24.5704	0.225944	0.447835	0.504525	0.613893	0.769217		ENSG00000052850	24.5704	0.225944	0.447835	0.504525	0.613893	0.769217
ENSG00000053108	301.434	0.329704	0.384989	0.856398	0.391778	0.560841		ENSG00000053108	301.434	-2.19227	0.0778431	-28.1627	1.67478e-174	5.90773e-174		ENSG00000053108	301.434	-2.19227	0.0778431	-28.1627	1.67478e-174	5.90773e-174		ENSG00000053108	301.434	0.329704	0.384989	0.856398	0.391778	0.560841		ENSG00000053108	301.434	0.329704	0.384989	0.856398	0.391778	0.560841
ENSG00000053254	1958.58	-0.162258	0.252479	-0.642658	0.520446	0.686145		ENSG00000053254	1958.58	-0.237483	0.0510393	-4.65295	3.27227e-06	4.73167e-06		ENSG00000053254	1958.58	-0.237483	0.0510393	-4.65295	3.27227e-06	4.73167e-06		ENSG00000053254	1958.58	-0.162258	0.252479	-0.642658	0.520446	0.686145		ENSG00000053254	1958.58	-0.162258	0.252479	-0.642658	0.520446	0.686145
ENSG00000053328	27.9673	0.163156	0.205951	0.792207	0.42824	0.597553		ENSG00000053328	27.9673	0.148898	0.041775	3.56429	0.000364847	0.000504722		ENSG00000053328	27.9673	0.148898	0.041775	3.56429	0.000364847	0.000504722		ENSG00000053328	27.9673	0.163156	0.205951	0.792207	0.42824	0.597553		ENSG00000053328	27.9673	0.163156	0.205951	0.792207	0.42824	0.597553
ENSG00000053371	969.983	-0.0108328	0.158324	-0.0684216	0.94545	1		ENSG00000053371	969.983	0.790908	0.0320125	24.7063	9.16143e-135	2.80406e-134		ENSG00000053371	969.983	0.790908	0.0320125	24.7063	9.16143e-135	2.80406e-134		ENSG00000053371	969.983	-0.0108328	0.158324	-0.0684216	0.94545	1		ENSG00000053371	969.983	-0.0108328	0.158324	-0.0684216	0.94545	1
ENSG00000053372	887.165	0.0101669	0.141201	0.072003	0.9426	1		ENSG00000053372	887.165	0.938708	0.0285537	32.8752	4.96525e-237	2.13888e-236		ENSG00000053372	887.165	0.938708	0.0285537	32.8752	4.96525e-237	2.13888e-236		ENSG00000053372	887.165	0.0101669	0.141201	0.072003	0.9426	1		ENSG00000053372	887.165	0.0101669	0.141201	0.072003	0.9426	1
ENSG00000053438	4573.49	-1.41299	0.474234	-2.97952	0.00288698	0.0114644		ENSG00000053438	4573.49	-1.51634	0.0958524	-15.8195	2.28355e-56	4.97874e-56		ENSG00000053438	4573.49	-1.51634	0.0958524	-15.8195	2.28355e-56	4.97874e-56		ENSG00000053438	4573.49	-1.41299	0.474234	-2.97952	0.00288698	0.0114644		ENSG00000053438	4573.49	-1.41299	0.474234	-2.97952	0.00288698	0.0114644
ENSG00000053501	746.166	0.305469	0.124705	2.44953	0.0143043	0.0430498		ENSG00000053501	746.166	-0.0650617	0.0252294	-2.5788	0.00991446	0.013145		ENSG00000053501	746.166	-0.0650617	0.0252294	-2.5788	0.00991446	0.013145		ENSG00000053501	746.166	0.305469	0.124705	2.44953	0.0143043	0.0430498		ENSG00000053501	746.166	0.305469	0.124705	2.44953	0.0143043	0.0430498
ENSG00000053524	1505.56	-0.623046	0.280876	-2.21822	0.0265397	0.0707381		ENSG00000053524	1505.56	-2.42188	0.0566963	-42.7166	0	0		ENSG00000053524	1505.56	-2.42188	0.0566963	-42.7166	0	0		ENSG00000053524	1505.56	-0.623046	0.280876	-2.21822	0.0265397	0.0707381		ENSG00000053524	1505.56	-0.623046	0.280876	-2.21822	0.0265397	0.0707381
ENSG00000053702	809.818	-0.159692	0.351297	-0.454579	0.649412	0.799666		ENSG00000053702	809.818	-2.61051	0.0709588	-36.7891	2.76225e-296	1.40444e-295		ENSG00000053702	809.818	-2.61051	0.0709588	-36.7891	2.76225e-296	1.40444e-295		ENSG00000053702	809.818	-0.159692	0.351297	-0.454579	0.649412	0.799666		ENSG00000053702	809.818	-0.159692	0.351297	-0.454579	0.649412	0.799666
ENSG00000053747	282.82	-0.248458	0.300813	-0.825953	0.408831	0.578021		ENSG00000053747	282.82	-0.740382	0.0607565	-12.186	3.68878e-34	7.03087e-34		ENSG00000053747	282.82	-0.740382	0.0607565	-12.186	3.68878e-34	7.03087e-34		ENSG00000053747	282.82	-0.248458	0.300813	-0.825953	0.408831	0.578021		ENSG00000053747	282.82	-0.248458	0.300813	-0.825953	0.408831	0.578021
ENSG00000053770	1223.66	-0.0843206	0.0918197	-0.918329	0.358447	0.525879		ENSG00000053770	1223.66	0.123809	0.0185564	6.67201	2.52316e-11	3.94494e-11		ENSG00000053770	1223.66	0.123809	0.0185564	6.67201	2.52316e-11	3.94494e-11		ENSG00000053770	1223.66	-0.0843206	0.0918197	-0.918329	0.358447	0.525879		ENSG00000053770	1223.66	-0.0843206	0.0918197	-0.918329	0.358447	0.525879
ENSG00000053900	868.797	-0.0360396	0.105923	-0.340244	0.733672	0.864723		ENSG00000053900	868.797	-0.279656	0.0214017	-13.067	5.08446e-39	1.0006e-38		ENSG00000053900	868.797	-0.279656	0.0214017	-13.067	5.08446e-39	1.0006e-38		ENSG00000053900	868.797	-0.0360396	0.105923	-0.340244	0.733672	0.864723		ENSG00000053900	868.797	-0.0360396	0.105923	-0.340244	0.733672	0.864723
ENSG00000053918	84.3029	0.670217	0.294767	2.27371	0.0229832	0.0629191		ENSG00000053918	84.3029	1.96832	0.0597227	32.9576	3.2938e-238	1.424e-237		ENSG00000053918	84.3029	1.96832	0.0597227	32.9576	3.2938e-238	1.424e-237		ENSG00000053918	84.3029	0.670217	0.294767	2.27371	0.0229832	0.0629191		ENSG00000053918	84.3029	0.670217	0.294767	2.27371	0.0229832	0.0629191
ENSG00000054116	1138.88	0.193691	0.0803416	2.41084	0.0159156	0.0468586		ENSG00000054116	1138.88	0.792452	0.0162592	48.7386	0	0		ENSG00000054116	1138.88	0.792452	0.0162592	48.7386	0	0		ENSG00000054116	1138.88	0.193691	0.0803416	2.41084	0.0159156	0.0468586		ENSG00000054116	1138.88	0.193691	0.0803416	2.41084	0.0159156	0.0468586
ENSG00000054118	2608.97	-0.128482	0.0731066	-1.75746	0.0788398	0.167235		ENSG00000054118	2608.97	0.699914	0.0147796	47.3569	0	0		ENSG00000054118	2608.97	0.699914	0.0147796	47.3569	0	0		ENSG00000054118	2608.97	-0.128482	0.0731066	-1.75746	0.0788398	0.167235		ENSG00000054118	2608.97	-0.128482	0.0731066	-1.75746	0.0788398	0.167235
ENSG00000054148	2059.73	0.260788	0.138502	1.88293	0.0597102	0.134631		ENSG00000054148	2059.73	0.349632	0.0280064	12.484	9.13145e-36	1.76022e-35		ENSG00000054148	2059.73	0.349632	0.0280064	12.484	9.13145e-36	1.76022e-35		ENSG00000054148	2059.73	0.260788	0.138502	1.88293	0.0597102	0.134631		ENSG00000054148	2059.73	0.260788	0.138502	1.88293	0.0597102	0.134631
ENSG00000054179	389.578	-0.366742	0.321634	-1.14025	0.254183	0.407936		ENSG00000054179	389.578	-0.139077	0.0649934	-2.13987	0.0323653	0.0420309		ENSG00000054179	389.578	-0.139077	0.0649934	-2.13987	0.0323653	0.0420309		ENSG00000054179	389.578	-0.366742	0.321634	-1.14025	0.254183	0.407936		ENSG00000054179	389.578	-0.366742	0.321634	-1.14025	0.254183	0.407936
ENSG00000054219	100.707	1.03282	0.26348	3.91993	8.86e-05	0.00062469		ENSG00000054219	100.707	-0.234369	0.0534761	-4.38268	1.17227e-05	1.67643e-05		ENSG00000054219	100.707	-0.234369	0.0534761	-4.38268	1.17227e-05	1.67643e-05		ENSG00000054219	100.707	1.03282	0.26348	3.91993	8.85749e-05	0.00062469		ENSG00000054219	100.707	1.03282	0.26348	3.91993	8.85749e-05	0.00062469
ENSG00000054267	1842.25	-0.286901	0.0975388	-2.94141	0.00326726	0.0127166		ENSG00000054267	1842.25	-0.462067	0.0196954	-23.4607	1.02867e-121	2.99548e-121		ENSG00000054267	1842.25	-0.462067	0.0196954	-23.4607	1.02867e-121	2.99548e-121		ENSG00000054267	1842.25	-0.286901	0.0975388	-2.94141	0.00326726	0.0127166		ENSG00000054267	1842.25	-0.286901	0.0975388	-2.94141	0.00326726	0.0127166
ENSG00000054277	301.646	0.143574	0.340898	0.421165	0.673634	0.819734		ENSG00000054277	301.646	-2.57098	0.0688672	-37.3324	4.89526e-305	2.54622e-304		ENSG00000054277	301.646	-2.57098	0.0688672	-37.3324	4.89526e-305	2.54622e-304		ENSG00000054277	301.646	0.143574	0.340898	0.421165	0.673634	0.819734		ENSG00000054277	301.646	0.143574	0.340898	0.421165	0.673634	0.819734
ENSG00000054282	938.141	-0.593253	0.0977882	-6.06672	1.31e-09	4.59e-08		ENSG00000054282	938.141	0.495194	0.0197297	25.0989	5.10816e-139	1.58931e-138		ENSG00000054282	938.141	0.495194	0.0197297	25.0989	5.10816e-139	1.58931e-138		ENSG00000054282	938.141	-0.593253	0.0977882	-6.06672	1.30548e-09	4.59328e-08		ENSG00000054282	938.141	-0.593253	0.0977882	-6.06672	1.30548e-09	4.59328e-08
ENSG00000054356	4300.24	0.740966	0.335231	2.21032	0.0270831	0.0719435		ENSG00000054356	4300.24	-2.06637	0.0677801	-30.4864	3.95053e-204	1.53677e-203		ENSG00000054356	4300.24	-2.06637	0.0677801	-30.4864	3.95053e-204	1.53677e-203		ENSG00000054356	4300.24	0.740966	0.335231	2.21032	0.0270831	0.0719435		ENSG00000054356	4300.24	0.740966	0.335231	2.21032	0.0270831	0.0719435
ENSG00000054392	127.656	0.049995	0.260584	0.191858	0.847854	0.945922		ENSG00000054392	127.656	0.738947	0.0527079	14.0197	1.18185e-44	2.40803e-44		ENSG00000054392	127.656	0.738947	0.0527079	14.0197	1.18185e-44	2.40803e-44		ENSG00000054392	127.656	0.049995	0.260584	0.191858	0.847853	0.945922		ENSG00000054392	127.656	0.049995	0.260584	0.191858	0.847853	0.945922
ENSG00000054523	12135	-0.509238	0.115494	-4.40923	1.04e-05	0.00010087		ENSG00000054523	12135	-0.227511	0.0233452	-9.74552	1.9278e-22	3.37256e-22		ENSG00000054523	12135	-0.227511	0.0233452	-9.74552	1.9278e-22	3.37256e-22		ENSG00000054523	12135	-0.509238	0.115494	-4.40923	1.03741e-05	0.000100866		ENSG00000054523	12135	-0.509238	0.115494	-4.40923	1.03741e-05	0.000100866
ENSG00000054598	276.685	0.63524	0.285126	2.22792	0.0258855	0.0693835		ENSG00000054598	276.685	-0.227218	0.0576901	-3.93859	8.19627e-05	0.000115133		ENSG00000054598	276.685	-0.227218	0.0576901	-3.93859	8.19627e-05	0.000115133		ENSG00000054598	276.685	0.63524	0.285126	2.22792	0.0258855	0.0693835		ENSG00000054598	276.685	0.63524	0.285126	2.22792	0.0258855	0.0693835
ENSG00000054611	681.093	0.15003	0.117883	1.27271	0.203122	0.345248		ENSG00000054611	681.093	0.081796	0.0238419	3.43076	0.000601884	0.000828065		ENSG00000054611	681.093	0.081796	0.0238419	3.43076	0.000601884	0.000828065		ENSG00000054611	681.093	0.15003	0.117883	1.27271	0.203122	0.345248		ENSG00000054611	681.093	0.15003	0.117883	1.27271	0.203122	0.345248
ENSG00000054654	1718.52	-1.43558	0.267888	-5.35887	8.37e-08	1.68e-06		ENSG00000054654	1718.52	1.87509	0.0541487	34.6284	9.43172e-263	4.38109e-262		ENSG00000054654	1718.52	1.87509	0.0541487	34.6284	9.43172e-263	4.38109e-262		ENSG00000054654	1718.52	-1.43558	0.267888	-5.35887	8.37425e-08	1.68445e-06		ENSG00000054654	1718.52	-1.43558	0.267888	-5.35887	8.37425e-08	1.68445e-06
ENSG00000054690	6252.48	0.196835	0.303191	0.64921	0.516203	0.68245		ENSG00000054690	6252.48	-2.54486	0.0612944	-41.5186	0	0		ENSG00000054690	6252.48	-2.54486	0.0612944	-41.5186	0	0		ENSG00000054690	6252.48	0.196835	0.303191	0.64921	0.516203	0.68245		ENSG00000054690	6252.48	0.196835	0.303191	0.64921	0.516203	0.68245
ENSG00000054793	7069.65	-0.172521	0.138518	-1.24548	0.212956	0.357709		ENSG00000054793	7069.65	-0.392218	0.0280014	-14.0071	1.41095e-44	2.87361e-44		ENSG00000054793	7069.65	-0.392218	0.0280014	-14.0071	1.41095e-44	2.87361e-44		ENSG00000054793	7069.65	-0.172521	0.138518	-1.24548	0.212956	0.357709		ENSG00000054793	7069.65	-0.172521	0.138518	-1.24548	0.212956	0.357709
ENSG00000054796	0.126601	-0.977899	1.80386	-0.542114	0.58774	NA		ENSG00000054796	0.126601	0.255639	0.363237	0.70378	0.48157	0.56947		ENSG00000054796	0.126601	0.255639	0.363237	0.70378	0.48157	0.56947		ENSG00000054796	0.126601	-0.977899	1.80386	-0.542114	0.58774	NA		ENSG00000054796	0.126601	-0.977899	1.80386	-0.542114	0.58774	NA
ENSG00000054803	334.144	0.946813	0.619837	1.52752	0.126632	0.240494		ENSG00000054803	334.144	-1.52857	0.125358	-12.1937	3.35939e-34	6.40433e-34		ENSG00000054803	334.144	-1.52857	0.125358	-12.1937	3.35939e-34	6.40433e-34		ENSG00000054803	334.144	0.946813	0.619837	1.52752	0.126632	0.240494		ENSG00000054803	334.144	0.946813	0.619837	1.52752	0.126632	0.240494
ENSG00000054938	17.1676	1.75006	0.337149	5.19078	2.09e-07	3.68e-06		ENSG00000054938	17.1676	2.09141	0.0689335	30.3395	3.45318e-202	1.33471e-201		ENSG00000054938	17.1676	2.09141	0.0689335	30.3395	3.45318e-202	1.33471e-201		ENSG00000054938	17.1676	1.75006	0.337149	5.19078	2.0942e-07	3.6827e-06		ENSG00000054938	17.1676	1.75006	0.337149	5.19078	2.0942e-07	3.6827e-06
ENSG00000054965	6058.7	-0.39825	0.100228	-3.97344	7.08e-05	0.00051462		ENSG00000054965	6058.7	0.145468	0.0202578	7.18085	6.92803e-13	1.10234e-12		ENSG00000054965	6058.7	0.145468	0.0202578	7.18085	6.92803e-13	1.10234e-12		ENSG00000054965	6058.7	-0.39825	0.100228	-3.97344	7.08425e-05	0.000514625		ENSG00000054965	6058.7	-0.39825	0.100228	-3.97344	7.08425e-05	0.000514625
ENSG00000054967	440.17	-0.272431	0.173177	-1.57314	0.115687	0.224597		ENSG00000054967	440.17	0.00979698	0.0349779	0.280091	0.779408	0.840025		ENSG00000054967	440.17	0.00979698	0.0349779	0.280091	0.779408	0.840025		ENSG00000054967	440.17	-0.272431	0.173177	-1.57314	0.115687	0.224597		ENSG00000054967	440.17	-0.272431	0.173177	-1.57314	0.115687	0.224597
ENSG00000054983	1226.92	0.185165	0.128605	1.4398	0.149924	0.273334		ENSG00000054983	1226.92	0.409033	0.0260079	15.7273	9.83662e-56	2.13645e-55		ENSG00000054983	1226.92	0.409033	0.0260079	15.7273	9.83662e-56	2.13645e-55		ENSG00000054983	1226.92	0.185165	0.128605	1.4398	0.149924	0.273334		ENSG00000054983	1226.92	0.185165	0.128605	1.4398	0.149924	0.273334
ENSG00000055044	983.853	-0.0145515	0.12428	-0.117086	0.906792	0.984841		ENSG00000055044	983.853	-0.290592	0.0251176	-11.5692	5.901e-31	1.10145e-30		ENSG00000055044	983.853	-0.290592	0.0251176	-11.5692	5.901e-31	1.10145e-30		ENSG00000055044	983.853	-0.0145515	0.12428	-0.117086	0.906792	0.984841		ENSG00000055044	983.853	-0.0145515	0.12428	-0.117086	0.906792	0.984841
ENSG00000055070	1886.36	0.235044	0.1403	1.6753	0.0938751	0.191201		ENSG00000055070	1886.36	0.486415	0.0283702	17.1453	6.81487e-66	1.55956e-65		ENSG00000055070	1886.36	0.486415	0.0283702	17.1453	6.81487e-66	1.55956e-65		ENSG00000055070	1886.36	0.235044	0.1403	1.6753	0.0938751	0.191201		ENSG00000055070	1886.36	0.235044	0.1403	1.6753	0.0938751	0.191201
ENSG00000055118	1412.03	-0.299698	0.274812	-1.09056	0.275469	0.432911		ENSG00000055118	1412.03	-0.514253	0.0555467	-9.25804	2.08223e-20	3.57937e-20		ENSG00000055118	1412.03	-0.514253	0.0555467	-9.25804	2.08223e-20	3.57937e-20		ENSG00000055118	1412.03	-0.299698	0.274812	-1.09056	0.275469	0.432911		ENSG00000055118	1412.03	-0.299698	0.274812	-1.09056	0.275469	0.432911
ENSG00000055130	1776.29	0.0275465	0.0752203	0.366212	0.714207	0.850634		ENSG00000055130	1776.29	0.518692	0.0152111	34.0995	7.4947e-255	3.40072e-254		ENSG00000055130	1776.29	0.518692	0.0152111	34.0995	7.4947e-255	3.40072e-254		ENSG00000055130	1776.29	0.0275465	0.0752203	0.366212	0.714207	0.850634		ENSG00000055130	1776.29	0.0275465	0.0752203	0.366212	0.714207	0.850634
ENSG00000055147	397.647	-0.0269019	0.096113	-0.279899	0.779555	0.898393		ENSG00000055147	397.647	1.62466	0.0194682	83.4519	0	0		ENSG00000055147	397.647	1.62466	0.0194682	83.4519	0	0		ENSG00000055147	397.647	-0.0269019	0.096113	-0.279899	0.779555	0.898393		ENSG00000055147	397.647	-0.0269019	0.096113	-0.279899	0.779555	0.898393
ENSG00000055163	6974.15	0.0779213	0.194381	0.400869	0.688517	0.83135		ENSG00000055163	6974.15	-1.53796	0.0392959	-39.138	0	0		ENSG00000055163	6974.15	-1.53796	0.0392959	-39.138	0	0		ENSG00000055163	6974.15	0.0779213	0.194381	0.400869	0.688517	0.83135		ENSG00000055163	6974.15	0.0779213	0.194381	0.400869	0.688517	0.83135
ENSG00000055208	1832.3	0.477889	0.136171	3.50949	0.00044897	0.00243058		ENSG00000055208	1832.3	0.47859	0.02754	17.378	1.21111e-67	2.79734e-67		ENSG00000055208	1832.3	0.47859	0.02754	17.378	1.21111e-67	2.79734e-67		ENSG00000055208	1832.3	0.477889	0.136171	3.50949	0.000448972	0.00243058		ENSG00000055208	1832.3	0.477889	0.136171	3.50949	0.000448972	0.00243058
ENSG00000055211	1069.84	0.580829	0.123394	4.7071	2.51e-06	3.07e-05		ENSG00000055211	1069.84	-0.133165	0.0249713	-5.3327	9.67621e-08	1.43803e-07		ENSG00000055211	1069.84	-0.133165	0.0249713	-5.3327	9.67621e-08	1.43803e-07		ENSG00000055211	1069.84	0.580829	0.123394	4.7071	2.51271e-06	3.06529e-05		ENSG00000055211	1069.84	0.580829	0.123394	4.7071	2.51271e-06	3.06529e-05
ENSG00000055332	1645.75	-0.190128	0.110169	-1.72578	0.0843877	0.17627		ENSG00000055332	1645.75	1.09592	0.0222741	49.2014	0	0		ENSG00000055332	1645.75	1.09592	0.0222741	49.2014	0	0		ENSG00000055332	1645.75	-0.190128	0.110169	-1.72578	0.0843877	0.17627		ENSG00000055332	1645.75	-0.190128	0.110169	-1.72578	0.0843877	0.17627
ENSG00000055483	1520.38	0.193464	0.164303	1.17749	0.239002	0.38981		ENSG00000055483	1520.38	-0.364251	0.0332199	-10.9648	5.64051e-28	1.02946e-27		ENSG00000055483	1520.38	-0.364251	0.0332199	-10.9648	5.64051e-28	1.02946e-27		ENSG00000055483	1520.38	0.193464	0.164303	1.17749	0.239002	0.38981		ENSG00000055483	1520.38	0.193464	0.164303	1.17749	0.239002	0.38981
ENSG00000055609	3292.03	-1.15503	0.169588	-6.81081	9.7e-12	6.17e-10		ENSG00000055609	3292.03	1.39602	0.0342774	40.7272	0	0		ENSG00000055609	3292.03	1.39602	0.0342774	40.7272	0	0		ENSG00000055609	3292.03	-1.15503	0.169588	-6.81081	9.70493e-12	6.16886e-10		ENSG00000055609	3292.03	-1.15503	0.169588	-6.81081	9.70493e-12	6.16886e-10
ENSG00000055732	27.1111	0.713866	0.517955	1.37824	0.16813	0.298547		ENSG00000055732	27.1111	-0.188788	0.104998	-1.79801	0.0721754	0.0920682		ENSG00000055732	27.1111	-0.188788	0.104998	-1.79801	0.0721754	0.0920682		ENSG00000055732	27.1111	0.713866	0.517955	1.37824	0.16813	0.298547		ENSG00000055732	27.1111	0.713866	0.517955	1.37824	0.16813	0.298547
ENSG00000055813	509.821	-0.219733	0.319709	-0.68729	0.4919	0.659084		ENSG00000055813	509.821	-3.72716	0.064349	-57.9211	0	0		ENSG00000055813	509.821	-3.72716	0.064349	-57.9211	0	0		ENSG00000055813	509.821	-0.219733	0.319709	-0.68729	0.4919	0.659084		ENSG00000055813	509.821	-0.219733	0.319709	-0.68729	0.4919	0.659084
ENSG00000055917	3092.41	0.18367	0.108546	1.6921	0.0906268	0.186178		ENSG00000055917	3092.41	0.142848	0.0219478	6.50852	7.58928e-11	1.17881e-10		ENSG00000055917	3092.41	0.142848	0.0219478	6.50852	7.58928e-11	1.17881e-10		ENSG00000055917	3092.41	0.18367	0.108546	1.6921	0.0906268	0.186178		ENSG00000055917	3092.41	0.18367	0.108546	1.6921	0.0906268	0.186178
ENSG00000055950	1210.37	0.366638	0.100657	3.64247	0.00027004	0.00159264		ENSG00000055950	1210.37	-0.628267	0.0203659	-30.849	5.78457e-209	2.28647e-208		ENSG00000055950	1210.37	-0.628267	0.0203659	-30.849	5.78457e-209	2.28647e-208		ENSG00000055950	1210.37	0.366638	0.100657	3.64247	0.000270038	0.00159264		ENSG00000055950	1210.37	0.366638	0.100657	3.64247	0.000270038	0.00159264
ENSG00000055955	322.147	-1.10255	0.242344	-4.54953	5.38e-06	5.8e-05		ENSG00000055955	322.147	-5.08192	0.0431856	-117.676	0	0		ENSG00000055955	322.147	-5.08192	0.0431856	-117.676	0	0		ENSG00000055955	322.147	-1.10255	0.242344	-4.54953	5.37661e-06	5.7965e-05		ENSG00000055955	322.147	-1.10255	0.242344	-4.54953	5.37661e-06	5.7965e-05
ENSG00000055957	4.69728	0.553821	0.430843	1.28543	0.19864	0.339265		ENSG00000055957	4.69728	2.24409	0.0886133	25.3245	1.71731e-141	5.39629e-141		ENSG00000055957	4.69728	2.24409	0.0886133	25.3245	1.71731e-141	5.39629e-141		ENSG00000055957	4.69728	0.553821	0.430843	1.28543	0.19864	0.339265		ENSG00000055957	4.69728	0.553821	0.430843	1.28543	0.19864	0.339265
ENSG00000056050	566.675	0.352318	0.109078	3.22997	0.00123805	0.00568276		ENSG00000056050	566.675	0.159749	0.0220842	7.23362	4.70275e-13	7.49539e-13		ENSG00000056050	566.675	0.159749	0.0220842	7.23362	4.70275e-13	7.49539e-13		ENSG00000056050	566.675	0.352318	0.109078	3.22997	0.00123805	0.00568276		ENSG00000056050	566.675	0.352318	0.109078	3.22997	0.00123805	0.00568276
ENSG00000056097	4007.77	0.00077708	0.0894007	0.00869212	0.993065	1		ENSG00000056097	4007.77	0.295401	0.0180744	16.3436	4.8288e-60	1.07256e-59		ENSG00000056097	4007.77	0.295401	0.0180744	16.3436	4.8288e-60	1.07256e-59		ENSG00000056097	4007.77	0.000777081	0.0894007	0.00869212	0.993065	1		ENSG00000056097	4007.77	0.000777081	0.0894007	0.00869212	0.993065	1
ENSG00000056277	116.656	-0.511333	0.123986	-4.12411	3.72e-05	0.00029798		ENSG00000056277	116.656	1.00149	0.0249523	40.1361	0	0		ENSG00000056277	116.656	1.00149	0.0249523	40.1361	0	0		ENSG00000056277	116.656	-0.511333	0.123986	-4.12411	3.72178e-05	0.000297979		ENSG00000056277	116.656	-0.511333	0.123986	-4.12411	3.72178e-05	0.000297979
ENSG00000056291	6.45114	-0.0449224	0.697218	-0.0644308	0.948627	1		ENSG00000056291	6.45114	-2.02464	0.139057	-14.5598	5.06306e-48	1.05226e-47		ENSG00000056291	6.45114	-2.02464	0.139057	-14.5598	5.06306e-48	1.05226e-47		ENSG00000056291	6.45114	-0.0449224	0.697218	-0.0644308	0.948627	1		ENSG00000056291	6.45114	-0.0449224	0.697218	-0.0644308	0.948627	1
ENSG00000056487	296.768	-0.719474	0.243417	-2.95572	0.0031194	0.0122351		ENSG00000056487	296.768	0.220747	0.0491281	4.49329	7.01297e-06	1.00697e-05		ENSG00000056487	296.768	0.220747	0.0491281	4.49329	7.01297e-06	1.00697e-05		ENSG00000056487	296.768	-0.719474	0.243417	-2.95572	0.0031194	0.0122351		ENSG00000056487	296.768	-0.719474	0.243417	-2.95572	0.0031194	0.0122351
ENSG00000056558	594.536	0.23258	0.191215	1.21633	0.223859	0.371387		ENSG00000056558	594.536	-0.303562	0.038667	-7.85067	4.13815e-15	6.75471e-15		ENSG00000056558	594.536	-0.303562	0.038667	-7.85067	4.13815e-15	6.75471e-15		ENSG00000056558	594.536	0.23258	0.191215	1.21633	0.223859	0.371387		ENSG00000056558	594.536	0.23258	0.191215	1.21633	0.223859	0.371387
ENSG00000056586	1372.52	-0.366216	0.107893	-3.39425	0.00068817	0.00348125		ENSG00000056586	1372.52	0.778441	0.0218042	35.7015	3.75102e-279	1.82013e-278		ENSG00000056586	1372.52	0.778441	0.0218042	35.7015	3.75102e-279	1.82013e-278		ENSG00000056586	1372.52	-0.366216	0.107893	-3.39425	0.000688174	0.00348125		ENSG00000056586	1372.52	-0.366216	0.107893	-3.39425	0.000688174	0.00348125
ENSG00000056736	957.021	-0.0730874	0.187348	-0.390116	0.696451	0.837341		ENSG00000056736	957.021	-0.275837	0.0378679	-7.2842	3.23591e-13	5.16654e-13		ENSG00000056736	957.021	-0.275837	0.0378679	-7.2842	3.23591e-13	5.16654e-13		ENSG00000056736	957.021	-0.0730874	0.187348	-0.390116	0.696451	0.837341		ENSG00000056736	957.021	-0.0730874	0.187348	-0.390116	0.696451	0.837341
ENSG00000056972	498.578	0.0687348	0.194675	0.353074	0.724033	0.858021		ENSG00000056972	498.578	1.24946	0.0393719	31.7349	5.13245e-221	2.10508e-220		ENSG00000056972	498.578	1.24946	0.0393719	31.7349	5.13245e-221	2.10508e-220		ENSG00000056972	498.578	0.0687348	0.194675	0.353074	0.724033	0.858021		ENSG00000056972	498.578	0.0687348	0.194675	0.353074	0.724033	0.858021
ENSG00000056998	559.855	0.237121	0.32541	0.728683	0.466195	0.634588		ENSG00000056998	559.855	0.679893	0.0657972	10.3332	4.9888e-25	8.90976e-25		ENSG00000056998	559.855	0.679893	0.0657972	10.3332	4.9888e-25	8.90976e-25		ENSG00000056998	559.855	0.237121	0.32541	0.728683	0.466195	0.634588		ENSG00000056998	559.855	0.237121	0.32541	0.728683	0.466195	0.634588
ENSG00000057019	687.744	0.866579	0.17991	4.81675	1.46e-06	1.92e-05		ENSG00000057019	687.744	1.93282	0.0364008	53.0982	0	0		ENSG00000057019	687.744	1.93282	0.0364008	53.0982	0	0		ENSG00000057019	687.744	0.866579	0.17991	4.81675	1.45918e-06	1.92431e-05		ENSG00000057019	687.744	0.866579	0.17991	4.81675	1.45918e-06	1.92431e-05
ENSG00000057149	2.25991	1.65121	0.703087	2.34852	0.0188482	0.053749		ENSG00000057149	2.25991	-3.35159	0.159284	-21.0416	2.73121e-98	7.23612e-98		ENSG00000057149	2.25991	-3.35159	0.159284	-21.0416	2.73121e-98	7.23612e-98		ENSG00000057149	2.25991	1.65121	0.703087	2.34852	0.0188482	0.053749		ENSG00000057149	2.25991	1.65121	0.703087	2.34852	0.0188482	0.053749
ENSG00000057252	595.303	0.0193432	0.166315	0.116305	0.907411	0.985196		ENSG00000057252	595.303	2.1357	0.0336446	63.4783	0	0		ENSG00000057252	595.303	2.1357	0.0336446	63.4783	0	0		ENSG00000057252	595.303	0.0193432	0.166315	0.116305	0.907411	0.985196		ENSG00000057252	595.303	0.0193432	0.166315	0.116305	0.907411	0.985196
ENSG00000057294	134.124	-0.245187	0.34585	-0.70894	0.478362	0.64635		ENSG00000057294	134.124	-0.805795	0.0698068	-11.5432	7.9887e-31	1.48977e-30		ENSG00000057294	134.124	-0.805795	0.0698068	-11.5432	7.9887e-31	1.48977e-30		ENSG00000057294	134.124	-0.245187	0.34585	-0.70894	0.478362	0.64635		ENSG00000057294	134.124	-0.245187	0.34585	-0.70894	0.478362	0.64635
ENSG00000057468	28.6401	-1.5095	0.379032	-3.98252	6.82e-05	0.00049814		ENSG00000057468	28.6401	-0.50197	0.0740246	-6.78113	1.19243e-11	1.87067e-11		ENSG00000057468	28.6401	-0.50197	0.0740246	-6.78113	1.19243e-11	1.87067e-11		ENSG00000057468	28.6401	-1.5095	0.379032	-3.98252	6.8189e-05	0.000498142		ENSG00000057468	28.6401	-1.5095	0.379032	-3.98252	6.8189e-05	0.000498142
ENSG00000057593	38.8209	-0.25442	0.324683	-0.783594	0.433278	0.602416		ENSG00000057593	38.8209	-1.97945	0.0645079	-30.6854	8.9169e-207	3.49737e-206		ENSG00000057593	38.8209	-1.97945	0.0645079	-30.6854	8.9169e-207	3.49737e-206		ENSG00000057593	38.8209	-0.25442	0.324683	-0.783594	0.433278	0.602416		ENSG00000057593	38.8209	-0.25442	0.324683	-0.783594	0.433278	0.602416
ENSG00000057608	2862.71	0.122338	0.108777	1.12467	0.26073	0.415987		ENSG00000057608	2862.71	1.00911	0.021996	45.877	0	0		ENSG00000057608	2862.71	1.00911	0.021996	45.877	0	0		ENSG00000057608	2862.71	0.122338	0.108777	1.12467	0.26073	0.415987		ENSG00000057608	2862.71	0.122338	0.108777	1.12467	0.26073	0.415987
ENSG00000057657	154.302	0.470536	0.263428	1.7862	0.0740665	0.159319		ENSG00000057657	154.302	1.33798	0.0533219	25.0925	6.00459e-139	1.86771e-138		ENSG00000057657	154.302	1.33798	0.0533219	25.0925	6.00459e-139	1.86771e-138		ENSG00000057657	154.302	0.470536	0.263428	1.7862	0.0740665	0.159319		ENSG00000057657	154.302	0.470536	0.263428	1.7862	0.0740665	0.159319
ENSG00000057663	653.293	0.137185	0.0978428	1.40209	0.160887	0.28859		ENSG00000057663	653.293	0.699217	0.0197998	35.3143	3.53746e-273	1.69007e-272		ENSG00000057663	653.293	0.699217	0.0197998	35.3143	3.53746e-273	1.69007e-272		ENSG00000057663	653.293	0.137185	0.0978428	1.40209	0.160887	0.28859		ENSG00000057663	653.293	0.137185	0.0978428	1.40209	0.160887	0.28859
ENSG00000057704	839.188	-0.218731	0.321105	-0.681183	0.495756	0.662959		ENSG00000057704	839.188	0.129853	0.0649112	2.00047	0.0454501	0.0586216		ENSG00000057704	839.188	0.129853	0.0649112	2.00047	0.0454501	0.0586216		ENSG00000057704	839.188	-0.218731	0.321105	-0.681183	0.495756	0.662959		ENSG00000057704	839.188	-0.218731	0.321105	-0.681183	0.495756	0.662959
ENSG00000057757	2864.18	0.130899	0.122876	1.06529	0.286747	0.445954		ENSG00000057757	2864.18	-0.863336	0.0248404	-34.7553	1.15209e-264	5.38202e-264		ENSG00000057757	2864.18	-0.863336	0.0248404	-34.7553	1.15209e-264	5.38202e-264		ENSG00000057757	2864.18	0.130899	0.122876	1.06529	0.286747	0.445954		ENSG00000057757	2864.18	0.130899	0.122876	1.06529	0.286747	0.445954
ENSG00000057935	1842.69	-0.133806	0.147031	-0.910058	0.362792	0.530625		ENSG00000057935	1842.69	-0.571822	0.0297145	-19.2439	1.58834e-82	3.93371e-82		ENSG00000057935	1842.69	-0.571822	0.0297145	-19.2439	1.58834e-82	3.93371e-82		ENSG00000057935	1842.69	-0.133807	0.147031	-0.910058	0.362792	0.530625		ENSG00000057935	1842.69	-0.133807	0.147031	-0.910058	0.362792	0.530625
ENSG00000058056	476.274	-0.267408	0.121284	-2.20481	0.0274674	0.0727581		ENSG00000058056	476.274	0.872674	0.0245108	35.6037	1.2287e-277	5.93949e-277		ENSG00000058056	476.274	0.872674	0.0245108	35.6037	1.2287e-277	5.93949e-277		ENSG00000058056	476.274	-0.267408	0.121284	-2.20481	0.0274674	0.0727581		ENSG00000058056	476.274	-0.267408	0.121284	-2.20481	0.0274674	0.0727581
ENSG00000058063	668.959	-0.179354	0.163699	-1.09564	0.273238	0.430579		ENSG00000058063	668.959	0.90881	0.0330948	27.4608	5.16069e-166	1.7707e-165		ENSG00000058063	668.959	0.90881	0.0330948	27.4608	5.16069e-166	1.7707e-165		ENSG00000058063	668.959	-0.179354	0.163699	-1.09564	0.273238	0.430579		ENSG00000058063	668.959	-0.179354	0.163699	-1.09564	0.273238	0.430579
ENSG00000058085	101.756	0.146722	0.513064	0.285972	0.7749	0.89462		ENSG00000058085	101.756	-1.31191	0.103704	-12.6505	1.11142e-36	2.15611e-36		ENSG00000058085	101.756	-1.31191	0.103704	-12.6505	1.11142e-36	2.15611e-36		ENSG00000058085	101.756	0.146722	0.513064	0.285972	0.7749	0.89462		ENSG00000058085	101.756	0.146722	0.513064	0.285972	0.7749	0.89462
ENSG00000058091	1900.03	-0.368841	0.216685	-1.7022	0.0887185	0.183137		ENSG00000058091	1900.03	0.563377	0.0438029	12.8616	7.39931e-38	1.4454e-37		ENSG00000058091	1900.03	0.563377	0.0438029	12.8616	7.39931e-38	1.4454e-37		ENSG00000058091	1900.03	-0.368841	0.216685	-1.7022	0.0887185	0.183137		ENSG00000058091	1900.03	-0.368841	0.216685	-1.7022	0.0887185	0.183137
ENSG00000058262	3735.74	0.166697	0.110311	1.51116	0.130748	0.246502		ENSG00000058262	3735.74	1.88737	0.0223069	84.6092	0	0		ENSG00000058262	3735.74	1.88737	0.0223069	84.6092	0	0		ENSG00000058262	3735.74	0.166697	0.110311	1.51116	0.130748	0.246502		ENSG00000058262	3735.74	0.166697	0.110311	1.51116	0.130748	0.246502
ENSG00000058272	1449.97	-0.17195	0.100232	-1.71552	0.0862497	0.179242		ENSG00000058272	1449.97	0.530018	0.0202598	26.1611	7.37525e-151	2.39473e-150		ENSG00000058272	1449.97	0.530018	0.0202598	26.1611	7.37525e-151	2.39473e-150		ENSG00000058272	1449.97	-0.17195	0.100232	-1.71552	0.0862497	0.179242		ENSG00000058272	1449.97	-0.17195	0.100232	-1.71552	0.0862497	0.179242
ENSG00000058335	2590.21	1.18641	0.374552	3.16755	0.00153729	0.00680526		ENSG00000058335	2590.21	-4.09795	0.0757823	-54.0753	0	0		ENSG00000058335	2590.21	-4.09795	0.0757823	-54.0753	0	0		ENSG00000058335	2590.21	1.18641	0.374552	3.16755	0.00153729	0.00680526		ENSG00000058335	2590.21	1.18641	0.374552	3.16755	0.00153729	0.00680526
ENSG00000058404	10045.2	0.460069	0.288339	1.59558	0.110582	0.216972		ENSG00000058404	10045.2	-3.23019	0.0582958	-55.4102	0	0		ENSG00000058404	10045.2	-3.23019	0.0582958	-55.4102	0	0		ENSG00000058404	10045.2	0.460069	0.288339	1.59558	0.110582	0.216972		ENSG00000058404	10045.2	0.460069	0.288339	1.59558	0.110582	0.216972
ENSG00000058453	1760.85	-0.761609	0.260425	-2.92448	0.00345034	0.0133162		ENSG00000058453	1760.85	-1.28864	0.052606	-24.4961	1.62581e-132	4.92989e-132		ENSG00000058453	1760.85	-1.28864	0.052606	-24.4961	1.62581e-132	4.92989e-132		ENSG00000058453	1760.85	-0.761609	0.260425	-2.92448	0.00345034	0.0133162		ENSG00000058453	1760.85	-0.761609	0.260425	-2.92448	0.00345034	0.0133162
ENSG00000058600	928.184	-0.570689	0.117926	-4.8394	1.3e-06	1.74e-05		ENSG00000058600	928.184	0.173605	0.0237978	7.29501	2.98642e-13	4.77018e-13		ENSG00000058600	928.184	0.173605	0.0237978	7.29501	2.98642e-13	4.77018e-13		ENSG00000058600	928.184	-0.570689	0.117926	-4.8394	1.30235e-06	1.74323e-05		ENSG00000058600	928.184	-0.570689	0.117926	-4.8394	1.30235e-06	1.74323e-05
ENSG00000058668	3934.81	-0.288969	0.175074	-1.65055	0.0988295	0.198973		ENSG00000058668	3934.81	1.3768	0.035395	38.8982	0	0		ENSG00000058668	3934.81	1.3768	0.035395	38.8982	0	0		ENSG00000058668	3934.81	-0.28897	0.175074	-1.65055	0.0988295	0.198973		ENSG00000058668	3934.81	-0.28897	0.175074	-1.65055	0.0988295	0.198973
ENSG00000058673	3371.13	-2.26488	0.270506	-8.37276	5.63e-17	1.48e-14		ENSG00000058673	3371.13	-7.45001	0.0470784	-158.247	0	0		ENSG00000058673	3371.13	-7.45001	0.0470784	-158.247	0	0		ENSG00000058673	3371.13	-2.26488	0.270506	-8.37276	5.62829e-17	1.48462e-14		ENSG00000058673	3371.13	-2.26488	0.270506	-8.37276	5.62829e-17	1.48462e-14
ENSG00000058729	371.399	0.0899851	0.0794733	1.13227	0.257522	0.411954		ENSG00000058729	371.399	0.625305	0.0160975	38.8448	0	0		ENSG00000058729	371.399	0.625305	0.0160975	38.8448	0	0		ENSG00000058729	371.399	0.0899851	0.0794734	1.13227	0.257522	0.411954		ENSG00000058729	371.399	0.0899851	0.0794734	1.13227	0.257522	0.411954
ENSG00000058799	534.184	0.298023	0.123954	2.40431	0.016203	0.0475521		ENSG00000058799	534.184	0.911053	0.0250895	36.3121	1.04337e-288	5.19675e-288		ENSG00000058799	534.184	0.911053	0.0250895	36.3121	1.04337e-288	5.19675e-288		ENSG00000058799	534.184	0.298023	0.123954	2.40431	0.016203	0.0475521		ENSG00000058799	534.184	0.298023	0.123954	2.40431	0.016203	0.0475521
ENSG00000058804	354.202	-0.158504	0.0839598	-1.88786	0.0590449	0.133514		ENSG00000058804	354.202	1.91847	0.017019	112.726	0	0		ENSG00000058804	354.202	1.91847	0.017019	112.726	0	0		ENSG00000058804	354.202	-0.158504	0.0839598	-1.88786	0.0590449	0.133514		ENSG00000058804	354.202	-0.158504	0.0839598	-1.88786	0.0590449	0.133514
ENSG00000058866	1249.33	-0.963521	0.29293	-3.28926	0.00100453	0.00476374		ENSG00000058866	1249.33	0.668047	0.0592045	11.2837	1.57948e-29	2.91537e-29		ENSG00000058866	1249.33	0.668047	0.0592045	11.2837	1.57948e-29	2.91537e-29		ENSG00000058866	1249.33	-0.963521	0.29293	-3.28926	0.00100453	0.00476374		ENSG00000058866	1249.33	-0.963521	0.29293	-3.28926	0.00100453	0.00476374
ENSG00000059122	2818.13	0.0104956	0.155543	0.0674773	0.946202	1		ENSG00000059122	2818.13	-1.29482	0.0314386	-41.1856	0	0		ENSG00000059122	2818.13	-1.29482	0.0314386	-41.1856	0	0		ENSG00000059122	2818.13	0.0104956	0.155543	0.0674773	0.946202	1		ENSG00000059122	2818.13	0.0104956	0.155543	0.0674773	0.946202	1
ENSG00000059145	1225.86	-0.304438	0.155212	-1.96144	0.049828	0.116934		ENSG00000059145	1225.86	-1.39609	0.0313268	-44.5653	0	0		ENSG00000059145	1225.86	-1.39609	0.0313268	-44.5653	0	0		ENSG00000059145	1225.86	-0.304438	0.155212	-1.96144	0.049828	0.116934		ENSG00000059145	1225.86	-0.304438	0.155212	-1.96144	0.049828	0.116934
ENSG00000059377	283.549	0.10732	0.356898	0.300702	0.763641	0.886011		ENSG00000059377	283.549	2.61436	0.0721812	36.2195	3.00688e-287	1.49131e-286		ENSG00000059377	283.549	2.61436	0.0721812	36.2195	3.00688e-287	1.49131e-286		ENSG00000059377	283.549	0.10732	0.356898	0.300702	0.763641	0.886011		ENSG00000059377	283.549	0.10732	0.356898	0.300702	0.763641	0.886011
ENSG00000059378	365.271	-0.11531	0.26393	-0.436896	0.662187	0.81021		ENSG00000059378	365.271	1.5378	0.0533697	28.814	1.4306e-182	5.18429e-182		ENSG00000059378	365.271	1.5378	0.0533697	28.814	1.4306e-182	5.18429e-182		ENSG00000059378	365.271	-0.11531	0.26393	-0.436896	0.662187	0.81021		ENSG00000059378	365.271	-0.11531	0.26393	-0.436896	0.662187	0.81021
ENSG00000059573	845.604	0.0820411	0.0835749	0.981648	0.326273	0.490501		ENSG00000059573	845.604	1.19627	0.016916	70.7184	0	0		ENSG00000059573	845.604	1.19627	0.016916	70.7184	0	0		ENSG00000059573	845.604	0.0820411	0.0835748	0.981648	0.326273	0.490501		ENSG00000059573	845.604	0.0820411	0.0835748	0.981648	0.326273	0.490501
ENSG00000059588	2100.66	-0.569656	0.230696	-2.46929	0.0135382	0.041203		ENSG00000059588	2100.66	-1.32289	0.0466078	-28.3834	3.2392e-177	1.15282e-176		ENSG00000059588	2100.66	-1.32289	0.0466078	-28.3834	3.2392e-177	1.15282e-176		ENSG00000059588	2100.66	-0.569656	0.230696	-2.46929	0.0135382	0.041203		ENSG00000059588	2100.66	-0.569656	0.230696	-2.46929	0.0135382	0.041203
ENSG00000059691	986.466	0.0465154	0.175788	0.264611	0.791309	0.906485		ENSG00000059691	986.466	-0.364995	0.0355358	-10.2712	9.50073e-25	1.69284e-24		ENSG00000059691	986.466	-0.364995	0.0355358	-10.2712	9.50073e-25	1.69284e-24		ENSG00000059691	986.466	0.0465154	0.175788	0.264611	0.791309	0.906485		ENSG00000059691	986.466	0.0465154	0.175788	0.264611	0.791309	0.906485
ENSG00000059728	864.907	0.282436	0.168503	1.67615	0.0937095	0.190996		ENSG00000059728	864.907	-0.367634	0.0340758	-10.7887	3.89245e-27	7.06001e-27		ENSG00000059728	864.907	-0.367634	0.0340758	-10.7887	3.89245e-27	7.06001e-27		ENSG00000059728	864.907	0.282436	0.168503	1.67615	0.0937095	0.190996		ENSG00000059728	864.907	0.282436	0.168503	1.67615	0.0937095	0.190996
ENSG00000059758	1817.62	-0.146322	0.165016	-0.886714	0.375233	0.543408		ENSG00000059758	1817.62	-0.278252	0.033354	-8.34237	7.28135e-17	1.21056e-16		ENSG00000059758	1817.62	-0.278252	0.033354	-8.34237	7.28135e-17	1.21056e-16		ENSG00000059758	1817.62	-0.146322	0.165016	-0.886714	0.375233	0.543408		ENSG00000059758	1817.62	-0.146322	0.165016	-0.886714	0.375233	0.543408
ENSG00000059769	237.76	0.503376	0.140842	3.57404	0.00035151	0.00198367		ENSG00000059769	237.76	-0.356649	0.02856	-12.4877	8.7112e-36	1.67955e-35		ENSG00000059769	237.76	-0.356649	0.02856	-12.4877	8.7112e-36	1.67955e-35		ENSG00000059769	237.76	0.503376	0.140842	3.57404	0.000351514	0.00198367		ENSG00000059769	237.76	0.503376	0.140842	3.57404	0.000351514	0.00198367
ENSG00000059804	2465.31	0.46065	0.236353	1.94899	0.0512961	0.119684		ENSG00000059804	2465.31	0.150741	0.0477878	3.15438	0.00160837	0.0021874		ENSG00000059804	2465.31	0.150741	0.0477878	3.15438	0.00160837	0.0021874		ENSG00000059804	2465.31	0.46065	0.236353	1.94899	0.0512961	0.119684		ENSG00000059804	2465.31	0.46065	0.236353	1.94899	0.0512961	0.119684
ENSG00000059915	11832.4	1.03779	0.361437	2.87129	0.00408798	0.0153093		ENSG00000059915	11832.4	-4.24037	0.0730844	-58.0201	0	0		ENSG00000059915	11832.4	-4.24037	0.0730844	-58.0201	0	0		ENSG00000059915	11832.4	1.03779	0.361437	2.87129	0.00408798	0.0153093		ENSG00000059915	11832.4	1.03779	0.361437	2.87129	0.00408798	0.0153093
ENSG00000060069	502.385	-0.160839	0.100861	-1.59466	0.110789	0.217213		ENSG00000060069	502.385	0.517659	0.0203799	25.4004	2.49355e-142	7.86e-142		ENSG00000060069	502.385	0.517659	0.0203799	25.4004	2.49355e-142	7.86e-142		ENSG00000060069	502.385	-0.160839	0.100861	-1.59466	0.110789	0.217213		ENSG00000060069	502.385	-0.160839	0.100861	-1.59466	0.110789	0.217213
ENSG00000060138	1345.73	0.858293	0.344492	2.49147	0.0127215	0.0392076		ENSG00000060138	1345.73	0.819723	0.069654	11.7685	5.67257e-32	1.06633e-31		ENSG00000060138	1345.73	0.819723	0.069654	11.7685	5.67257e-32	1.06633e-31		ENSG00000060138	1345.73	0.858293	0.344492	2.49147	0.0127215	0.0392076		ENSG00000060138	1345.73	0.858293	0.344492	2.49147	0.0127215	0.0392076
ENSG00000060140	103.909	0.586796	0.566392	1.03603	0.30019	0.461378		ENSG00000060140	103.909	-2.60415	0.114651	-22.7136	3.28443e-114	9.30652e-114		ENSG00000060140	103.909	-2.60415	0.114651	-22.7136	3.28443e-114	9.30652e-114		ENSG00000060140	103.909	0.586796	0.566392	1.03603	0.30019	0.461378		ENSG00000060140	103.909	0.586796	0.566392	1.03603	0.30019	0.461378
ENSG00000060237	11339.1	-0.068522	0.237691	-0.288281	0.773131	0.893234		ENSG00000060237	11339.1	-0.677959	0.0480532	-14.1085	3.36626e-45	6.88248e-45		ENSG00000060237	11339.1	-0.677959	0.0480532	-14.1085	3.36626e-45	6.88248e-45		ENSG00000060237	11339.1	-0.068522	0.237691	-0.288281	0.773131	0.893234		ENSG00000060237	11339.1	-0.068522	0.237691	-0.288281	0.773131	0.893234
ENSG00000060303	1.30997	-1.37786	0.366736	-3.75709	0.0001719	0.00108594		ENSG00000060303	1.30997	3.91222	0.076149	51.3759	0	0		ENSG00000060303	1.30997	3.91222	0.076149	51.3759	0	0		ENSG00000060303	1.30997	-1.37786	0.366736	-3.75709	0.000171898	0.00108594		ENSG00000060303	1.30997	-1.37786	0.366736	-3.75709	0.000171898	0.00108594
ENSG00000060339	1549.6	0.149527	0.104413	1.43207	0.152123	0.276337		ENSG00000060339	1549.6	-0.45245	0.0211105	-21.4324	6.66351e-102	1.79023e-101		ENSG00000060339	1549.6	-0.45245	0.0211105	-21.4324	6.66351e-102	1.79023e-101		ENSG00000060339	1549.6	0.149527	0.104413	1.43207	0.152123	0.276337		ENSG00000060339	1549.6	0.149527	0.104413	1.43207	0.152123	0.276337
ENSG00000060491	1983.16	0.0246142	0.145533	0.169132	0.865693	0.958475		ENSG00000060491	1983.16	-0.579588	0.0294182	-19.7016	2.08747e-86	5.26227e-86		ENSG00000060491	1983.16	-0.579588	0.0294182	-19.7016	2.08747e-86	5.26227e-86		ENSG00000060491	1983.16	0.0246142	0.145533	0.169132	0.865693	0.958475		ENSG00000060491	1983.16	0.0246142	0.145533	0.169132	0.865693	0.958475
ENSG00000060558	130.841	0.687178	0.292737	2.34742	0.0189039	0.0538657		ENSG00000060558	130.841	1.38061	0.0592646	23.2957	4.90126e-120	1.41926e-119		ENSG00000060558	130.841	1.38061	0.0592646	23.2957	4.90126e-120	1.41926e-119		ENSG00000060558	130.841	0.687178	0.292737	2.34742	0.0189039	0.0538657		ENSG00000060558	130.841	0.687178	0.292737	2.34742	0.0189039	0.0538657
ENSG00000060566	19.2688	1.14843	0.51729	2.2201	0.0264123	0.0705144		ENSG00000060566	19.2688	-4.78287	0.111836	-42.7669	0	0		ENSG00000060566	19.2688	-4.78287	0.111836	-42.7669	0	0		ENSG00000060566	19.2688	1.14843	0.51729	2.2201	0.0264123	0.0705144		ENSG00000060566	19.2688	1.14843	0.51729	2.2201	0.0264123	0.0705144
ENSG00000060642	322.2	-0.0356487	0.11442	-0.311559	0.755376	0.87978		ENSG00000060642	322.2	0.716046	0.0231434	30.9395	3.51669e-210	1.39427e-209		ENSG00000060642	322.2	0.716046	0.0231434	30.9395	3.51669e-210	1.39427e-209		ENSG00000060642	322.2	-0.0356487	0.11442	-0.311559	0.755376	0.87978		ENSG00000060642	322.2	-0.0356487	0.11442	-0.311559	0.755376	0.87978
ENSG00000060656	923.939	1.22723	0.242285	5.06522	4.08e-07	6.5e-06		ENSG00000060656	923.939	-0.768751	0.0490186	-15.6828	1.98204e-55	4.29708e-55		ENSG00000060656	923.939	-0.768751	0.0490186	-15.6828	1.98204e-55	4.29708e-55		ENSG00000060656	923.939	1.22723	0.242285	5.06522	4.07922e-07	6.49653e-06		ENSG00000060656	923.939	1.22723	0.242285	5.06522	4.07922e-07	6.49653e-06
ENSG00000060688	619.118	-0.190978	0.120273	-1.58788	0.112314	0.219432		ENSG00000060688	619.118	1.73433	0.0243295	71.2853	0	0		ENSG00000060688	619.118	1.73433	0.0243295	71.2853	0	0		ENSG00000060688	619.118	-0.190978	0.120273	-1.58788	0.112314	0.219432		ENSG00000060688	619.118	-0.190978	0.120273	-1.58788	0.112314	0.219432
ENSG00000060709	985.706	0.640461	0.379906	1.68584	0.0918263	0.188132		ENSG00000060709	985.706	-2.77341	0.076835	-36.0957	2.65232e-285	1.30868e-284		ENSG00000060709	985.706	-2.77341	0.076835	-36.0957	2.65232e-285	1.30868e-284		ENSG00000060709	985.706	0.640461	0.379906	1.68584	0.0918263	0.188132		ENSG00000060709	985.706	0.640461	0.379906	1.68584	0.0918263	0.188132
ENSG00000060718	699.243	0.488803	0.338224	1.44521	0.1484	0.271237		ENSG00000060718	699.243	1.36596	0.0683901	19.9731	9.44177e-89	2.40316e-88		ENSG00000060718	699.243	1.36596	0.0683901	19.9731	9.44177e-89	2.40316e-88		ENSG00000060718	699.243	0.488803	0.338224	1.44521	0.1484	0.271237		ENSG00000060718	699.243	0.488803	0.338224	1.44521	0.1484	0.271237
ENSG00000060749	839.979	-0.365435	0.154219	-2.36958	0.0178083	0.0513096		ENSG00000060749	839.979	1.36638	0.0311775	43.826	0	0		ENSG00000060749	839.979	1.36638	0.0311775	43.826	0	0		ENSG00000060749	839.979	-0.365435	0.154219	-2.36958	0.0178083	0.0513096		ENSG00000060749	839.979	-0.365435	0.154219	-2.36958	0.0178083	0.0513096
ENSG00000060762	1798.42	0.207204	0.171477	1.20835	0.226914	0.374993		ENSG00000060762	1798.42	-0.0333189	0.034671	-0.961003	0.336551	0.407688		ENSG00000060762	1798.42	-0.0333189	0.034671	-0.961003	0.336551	0.407688		ENSG00000060762	1798.42	0.207204	0.171477	1.20835	0.226914	0.374993		ENSG00000060762	1798.42	0.207204	0.171477	1.20835	0.226914	0.374993
ENSG00000060971	1991.71	0.297053	0.0923039	3.2182	0.00128997	0.00587455		ENSG00000060971	1991.71	-0.870492	0.0186679	-46.6303	0	0		ENSG00000060971	1991.71	-0.870492	0.0186679	-46.6303	0	0		ENSG00000060971	1991.71	0.297053	0.0923039	3.2182	0.00128997	0.00587455		ENSG00000060971	1991.71	0.297053	0.0923039	3.2182	0.00128997	0.00587455
ENSG00000060982	1187.52	-0.572215	0.293573	-1.94914	0.051279	0.119651		ENSG00000060982	1187.52	2.48512	0.0593545	41.869	0	0		ENSG00000060982	1187.52	2.48512	0.0593545	41.869	0	0		ENSG00000060982	1187.52	-0.572215	0.293573	-1.94914	0.051279	0.119651		ENSG00000060982	1187.52	-0.572215	0.293573	-1.94914	0.051279	0.119651
ENSG00000061273	1740.76	0.135843	0.131942	1.02956	0.303215	0.464799		ENSG00000061273	1740.76	-0.247	0.0266763	-9.25919	2.05998e-20	3.54132e-20		ENSG00000061273	1740.76	-0.247	0.0266763	-9.25919	2.05998e-20	3.54132e-20		ENSG00000061273	1740.76	0.135843	0.131942	1.02956	0.303215	0.464799		ENSG00000061273	1740.76	0.135843	0.131942	1.02956	0.303215	0.464799
ENSG00000061337	1499.45	0.183437	0.402406	0.45585	0.648498	0.798808		ENSG00000061337	1499.45	0.30484	0.0813565	3.74697	0.000178982	0.000249488		ENSG00000061337	1499.45	0.30484	0.0813565	3.74697	0.000178982	0.000249488		ENSG00000061337	1499.45	0.183437	0.402406	0.45585	0.648498	0.798808		ENSG00000061337	1499.45	0.183437	0.402406	0.45585	0.648498	0.798808
ENSG00000061455	39.388	-0.30961	0.254447	-1.2168	0.223682	0.371181		ENSG00000061455	39.388	-0.177177	0.051087	-3.46814	0.000524071	0.000722309		ENSG00000061455	39.388	-0.177177	0.051087	-3.46814	0.000524071	0.000722309		ENSG00000061455	39.388	-0.30961	0.254447	-1.2168	0.223682	0.371181		ENSG00000061455	39.388	-0.30961	0.254447	-1.2168	0.223682	0.371181
ENSG00000061492	11.1076	-0.917794	0.475057	-1.93196	0.0533639	0.123446		ENSG00000061492	11.1076	-2.17073	0.08699	-24.9538	1.94204e-137	6.00259e-137		ENSG00000061492	11.1076	-2.17073	0.08699	-24.9538	1.94204e-137	6.00259e-137		ENSG00000061492	11.1076	-0.917794	0.475057	-1.93196	0.0533639	0.123446		ENSG00000061492	11.1076	-0.917794	0.475057	-1.93196	0.0533639	0.123446
ENSG00000061656	82.0049	0.603654	0.2626	2.29875	0.0215189	0.0597224		ENSG00000061656	82.0049	1.73367	0.0532298	32.5695	1.11034e-232	4.72382e-232		ENSG00000061656	82.0049	1.73367	0.0532298	32.5695	1.11034e-232	4.72382e-232		ENSG00000061656	82.0049	0.603654	0.2626	2.29875	0.0215189	0.0597224		ENSG00000061656	82.0049	0.603654	0.2626	2.29875	0.0215189	0.0597224
ENSG00000061676	5376.97	0.0136262	0.124349	0.109581	0.912742	0.988123		ENSG00000061676	5376.97	0.221562	0.0251397	8.81321	1.2161e-18	2.05661e-18		ENSG00000061676	5376.97	0.221562	0.0251397	8.81321	1.2161e-18	2.05661e-18		ENSG00000061676	5376.97	0.0136262	0.124349	0.109581	0.912742	0.988123		ENSG00000061676	5376.97	0.0136262	0.124349	0.109581	0.912742	0.988123
ENSG00000061794	905.992	0.0605064	0.0879135	0.688249	0.491296	0.658642		ENSG00000061794	905.992	0.735674	0.0177847	41.3655	0	0		ENSG00000061794	905.992	0.735674	0.0177847	41.3655	0	0		ENSG00000061794	905.992	0.0605064	0.0879135	0.688249	0.491296	0.658642		ENSG00000061794	905.992	0.0605064	0.0879135	0.688249	0.491296	0.658642
ENSG00000061918	1797.18	0.250691	0.248793	1.00763	0.313632	0.476539		ENSG00000061918	1797.18	-1.47169	0.050299	-29.2588	3.47002e-188	1.28308e-187		ENSG00000061918	1797.18	-1.47169	0.050299	-29.2588	3.47002e-188	1.28308e-187		ENSG00000061918	1797.18	0.250691	0.248793	1.00763	0.313632	0.476539		ENSG00000061918	1797.18	0.250691	0.248793	1.00763	0.313632	0.476539
ENSG00000061936	2075.49	-0.328762	0.122826	-2.67664	0.00743643	0.0251831		ENSG00000061936	2075.49	-0.737827	0.0248077	-29.7418	2.21276e-194	8.35413e-194		ENSG00000061936	2075.49	-0.737827	0.0248077	-29.7418	2.21276e-194	8.35413e-194		ENSG00000061936	2075.49	-0.328762	0.122826	-2.67664	0.00743643	0.0251831		ENSG00000061936	2075.49	-0.328762	0.122826	-2.67664	0.00743643	0.0251831
ENSG00000061938	8101.46	-0.0964084	0.155139	-0.621434	0.534314	0.698429		ENSG00000061938	8101.46	-1.74842	0.0313583	-55.7563	0	0		ENSG00000061938	8101.46	-1.74842	0.0313583	-55.7563	0	0		ENSG00000061938	8101.46	-0.0964084	0.155139	-0.621434	0.534314	0.698429		ENSG00000061938	8101.46	-0.0964084	0.155139	-0.621434	0.534314	0.698429
[truncated: 56,727 more rows]

## Sheet: Table_S3
Filtered Identified immunopeptides in BT67 AAVS1, PSME1KO, and PSME2KO
[truncated: 792 more rows]

## Sheet: Table_S4
Differentially expressed genes in single cell clusters from GL261 Scramble, PSME1KD, and PSME2KD tumors
[truncated: 15,595 more rows]
[truncated: 173 more columns]

[truncated: 6 more sheets: Table_S5, Table_S6, Table_S7, Table_S8, Table_S9, Table_S10]
